# Supplementary material for: RETRACTED: METTL3-mediated m6A modification of circNOTCH2 attenuates osteogenic impairment of PDLSCs in inflammatory microenvironment via the miR-193b-3p/KCNJ2/NLRP3 axis
Source: Research Square preprint supplement (doi:10.21203/rs.3.rs-7971329/v1), 2025-12-17
Supplement: Supplementary file 1 [file 44ea3fe5e9eeec0019aac779.docx]

| Gene name | Sequence (5'~3') |
| --- | --- |
| hsa_circ_0005737-F | 5'-GTCGGCAGACTGGTGACTT-3' |
| hsa_circ_0005737-R | 5'-CACAGGGGTCTCGATGTTG-3' |
| NOTCH2-F | 5'-GTGCCTATGTCCATCTGGATGG-3' |
| NOTCH2-R | 5'-AGACACCTGAGTGCTGGCACAA-3' |
| RUNX2-F | 5'-CGAATGGCTAGCACGCTATTAA-3' |
| RUNX2-R | 5'-GTCGCCATAACAGATTCATCCA-3' |
| OPN- F | 5'-CTCCATTGACTCGAACGACTC-3' |
| OPN- R | 5'-CAGGTCTGCGAAACTTCTTAGAT-3' |
| OCN-F | 5'-GGCGCTACCTGTATCAATGG-3' |
| OCN-R | 5'-GTGGTCAGCCAACTCGTCA-3' |
| KCNJ2-F | 5'-GTGCGAACCAACCGCTACA-3' |
| KCNJ2-R | 5'-CCAGCGAATGTCCACACAC-3' |
| hsa_circ_0005737-m6A-F | 5'-ACCCCTGTGAGAAGAACCG-3' |
| hsa_circ_0005737-m6A-R | 5'-CCTGTAAACCCTGAGGCAC-3' |
| Stem-loop primer | 5'-GTCGTATCCAGTGCAGGGTCCGAGGTATTCGCACTGGATACGAC-3' |
| mQ primer Reverse | 5'-=AGTGCAGGGTCCGAGGTATT-3' |
| hsa-miR-1260a-F | 5'-GCGCGATCCCACCTCTG-3' |
| hsa-miR-146b-3p-F | 5'-GCGTGCCCTGTGGACTCAG-3' |
| hsa-miR-193b-3p-F | 5'-GCGAACTGGCCCTCAAAGT-3' |
| hsa-miR-582-3p-F | 5'-GCGCGTAACTGGTTGAACAAC-3' |
| hsa-miR-125a-5p-F | 5'-GCGTCCCTGAGACCCTTTAAC-3' |
| hsa-miR-101-3p-F | 5'-GCGCGCGTACAGTACTGTGATA-3' |
| si-1#-hsa_circ_0005737-S | 5'-CCUUCCAGAUGUCCAGAAGTT-3' |
| si-1#-hsa_circ_0005737-AS | 5'-CUUCUGGACAUCUGGAAGGTT-3' |
| si-2#-hsa_circ_0005737-S | 5'-CCAGAUGUCCAGAAGGCUUTT-3' |
| si-2#-hsa_circ_0005737-AS | 5'-AAGCCUUCUGGACAUCUGGTI-3' |
| si-3#-hsa_circ_0005737-S | 5'-AGAUGUCCAGAAGGCUUCUUGTT-3' |
| si-3#-hsa_circ_0005737-AS | 5'-CAAGAAGCCUUCUGGACAUCUTT-3' |
| si-Nagative control-S | 5'-UUC UCC GAA CGU GUC ACG UTT-3' |
| si-Nagative control-AS | 5'-ACG UGA CAC GUU CGG AGA ATT-3' |
| si-METTL3-S | 5'- GCAGUUCCUGAAUUAGCUACA-3' |
| si-METTL3-AS | 5'- UGUAGCUAAUUCAGGAACUGC-3' |
| hsa-miR-1260a mimics-S | 5'-AUCCCACCUCUGCCACCA-3' |
| hsa-miR-1260a mimics-AS | 5'-GUGGCAGAGGUGGGAUUU-3' |
| hsa-miR-193b-3p mimics-S | 5'-AACUGGCCCUCAAAGUCCCGCU-3' |
| hsa-miR-193b-3p mimics-AS | 5'-CGGGACUUUGAGGGCCAGUUUU-3' |
| hsa-miR-1260a inhibitor-S | 5'-UGGUGGCAGAGGUGGGAU-3' |
| hsa-miR-193b-3p inhibitor-S | 5'-AGCGGGACUUUGAGGGCCAGUU-3' |
| mircoRNA inhibitor NC | 5'-CAGUACUUUUGUGUAGUACAA-3' |
| si-1#-KCNJ2-S | 5'-GCCGCUUUGUGAAGAAAGATT-3' |
| si-1#-KCNJ2-AS | 5'-UCUUUCUUCACAAAGCGGCTT-3' |
| si-2#-KCNJ2-S | 5'-GGUGUCCCCAAUCACUAUATT-3' |
| si-2#-KCNJ2-AS | 5'-UAUAGUGAUUGGGGACACCTT-3' |
| si-3#-KCNJ2-S | 5'-GCUCUUAUCUAGCAAAUGATT-3' |
| si-3#-KCNJ2-AS | 5'-UCAUUUGCUAGAUAAGAGCTT-3' |

Table1 RT-qPCR experimental primers and associated siRNA sequences
