# Supplementary material for: RETRACTED: METTL3-mediated m6A modification of circNOTCH2 attenuates osteogenic impairment of PDLSCs in inflammatory microenvironment via the miR-193b-3p/KCNJ2/NLRP3 axis
Source: Research Square preprint supplement (doi:10.21203/rs.3.rs-7971329/v1), 2025-12-17
Supplement: Supplementary file 2 [file 5e1bd7c493f2a356fcd6f3c0.xlsx]

## Sheet: miRDB
Predicting downstream targets of miR-193b-3p
Target Rank	Target Score	miRNA Name	Gene Symbol	Gene Description
1	99	hsa-miR-193b-3p	MAPK10	mitogen-activated protein kinase 10
2	98	hsa-miR-193b-3p	PIGA	phosphatidylinositol glycan anchor biosynthesis class A
3	97	hsa-miR-193b-3p	DCAF7	DDB1 and CUL4 associated factor 7
4	97	hsa-miR-193b-3p	RAPGEF6	Rap guanine nucleotide exchange factor 6
5	95	hsa-miR-193b-3p	ERBB4	erb-b2 receptor tyrosine kinase 4
6	95	hsa-miR-193b-3p	ABI2	abl interactor 2
7	94	hsa-miR-193b-3p	DMXL2	Dmx like 2
8	94	hsa-miR-193b-3p	FLI1	Fli-1 proto-oncogene, ETS transcription factor
9	93	hsa-miR-193b-3p	PLAG1	PLAG1 zinc finger
10	93	hsa-miR-193b-3p	VN1R1	vomeronasal 1 receptor 1
11	93	hsa-miR-193b-3p	SOS2	SOS Ras/Rho guanine nucleotide exchange factor 2
12	92	hsa-miR-193b-3p	KCNJ2	potassium voltage-gated channel subfamily J member 2
13	92	hsa-miR-193b-3p	IL17RD	interleukin 17 receptor D
14	92	hsa-miR-193b-3p	FHDC1	FH2 domain containing 1
15	91	hsa-miR-193b-3p	LYRM2	LYR motif containing 2
16	91	hsa-miR-193b-3p	CARF	calcium responsive transcription factor
17	90	hsa-miR-193b-3p	ARHGEF12	Rho guanine nucleotide exchange factor 12
18	90	hsa-miR-193b-3p	MARF1	meiosis regulator and mRNA stability factor 1
19	90	hsa-miR-193b-3p	RRAS2	RAS related 2
20	90	hsa-miR-193b-3p	SLC10A6	solute carrier family 10 member 6
21	90	hsa-miR-193b-3p	SIAH1	siah E3 ubiquitin protein ligase 1
22	89	hsa-miR-193b-3p	SLC16A6	solute carrier family 16 member 6
23	89	hsa-miR-193b-3p	TAPT1	transmembrane anterior posterior transformation 1
24	89	hsa-miR-193b-3p	NT5E	5'-nucleotidase ecto
25	89	hsa-miR-193b-3p	PLAU	plasminogen activator, urokinase
26	89	hsa-miR-193b-3p	TAOK1	TAO kinase 1
27	88	hsa-miR-193b-3p	IGFBP5	insulin like growth factor binding protein 5
28	88	hsa-miR-193b-3p	CYREN	cell cycle regulator of NHEJ
29	88	hsa-miR-193b-3p	CLTC	clathrin heavy chain
30	88	hsa-miR-193b-3p	HNRNPUL2	heterogeneous nuclear ribonucleoprotein U like 2
31	88	hsa-miR-193b-3p	FAT4	FAT atypical cadherin 4
32	88	hsa-miR-193b-3p	CADM1	cell adhesion molecule 1
33	88	hsa-miR-193b-3p	CNOT6	CCR4-NOT transcription complex subunit 6
34	87	hsa-miR-193b-3p	CCND1	cyclin D1
35	87	hsa-miR-193b-3p	EPHA5	EPH receptor A5
36	87	hsa-miR-193b-3p	CLOCK	clock circadian regulator
37	87	hsa-miR-193b-3p	WDR82	WD repeat domain 82
38	87	hsa-miR-193b-3p	AP2M1	adaptor related protein complex 2 subunit mu 1
39	87	hsa-miR-193b-3p	GPR20	G protein-coupled receptor 20
40	86	hsa-miR-193b-3p	TSC1	TSC complex subunit 1
41	86	hsa-miR-193b-3p	CCDC28A	coiled-coil domain containing 28A
42	86	hsa-miR-193b-3p	ETS1	ETS proto-oncogene 1, transcription factor
43	86	hsa-miR-193b-3p	HEG1	heart development protein with EGF like domains 1
44	86	hsa-miR-193b-3p	UPRT	uracil phosphoribosyltransferase homolog
45	86	hsa-miR-193b-3p	ATF7IP2	activating transcription factor 7 interacting protein 2
46	86	hsa-miR-193b-3p	ST6GALNAC5	ST6 N-acetylgalactosaminide alpha-2,6-sialyltransferase 5
47	85	hsa-miR-193b-3p	LAMC2	laminin subunit gamma 2
48	85	hsa-miR-193b-3p	KIT	KIT proto-oncogene receptor tyrosine kinase
49	85	hsa-miR-193b-3p	KRAS	KRAS proto-oncogene, GTPase
50	85	hsa-miR-193b-3p	RGMA	repulsive guidance molecule BMP co-receptor a
51	85	hsa-miR-193b-3p	RUNX1T1	RUNX1 translocation partner 1
52	85	hsa-miR-193b-3p	INO80D	INO80 complex subunit D
53	85	hsa-miR-193b-3p	AREL1	apoptosis resistant E3 ubiquitin protein ligase 1
54	85	hsa-miR-193b-3p	LAMC1	laminin subunit gamma 1
55	84	hsa-miR-193b-3p	HOXD13	homeobox D13
56	84	hsa-miR-193b-3p	TGFBR3	transforming growth factor beta receptor 3
57	84	hsa-miR-193b-3p	AIMP2	aminoacyl tRNA synthetase complex interacting multifunctional protein 2
58	84	hsa-miR-193b-3p	YWHAZ	tyrosine 3-monooxygenase/tryptophan 5-monooxygenase activation protein zeta
59	84	hsa-miR-193b-3p	UBP1	upstream binding protein 1
60	84	hsa-miR-193b-3p	P2RX5	purinergic receptor P2X 5
61	83	hsa-miR-193b-3p	ZMAT3	zinc finger matrin-type 3
62	83	hsa-miR-193b-3p	CREBRF	CREB3 regulatory factor
63	83	hsa-miR-193b-3p	ETV1	ETS variant 1
64	83	hsa-miR-193b-3p	TIMM8B	translocase of inner mitochondrial membrane 8 homolog B
65	83	hsa-miR-193b-3p	PLCH1	phospholipase C eta 1
66	83	hsa-miR-193b-3p	EARS2	glutamyl-tRNA synthetase 2, mitochondrial
67	83	hsa-miR-193b-3p	LRP4	LDL receptor related protein 4
68	83	hsa-miR-193b-3p	ZNF618	zinc finger protein 618
69	83	hsa-miR-193b-3p	NAV3	neuron navigator 3
70	83	hsa-miR-193b-3p	ADGRE5	adhesion G protein-coupled receptor E5
71	83	hsa-miR-193b-3p	RBMXL1	RBMX like 1
72	83	hsa-miR-193b-3p	OSMR	oncostatin M receptor
73	83	hsa-miR-193b-3p	ADARB1	adenosine deaminase, RNA specific B1
74	82	hsa-miR-193b-3p	CBX7	chromobox 7
75	82	hsa-miR-193b-3p	AAK1	AP2 associated kinase 1
76	82	hsa-miR-193b-3p	DNAAF4	dynein axonemal assembly factor 4
77	81	hsa-miR-193b-3p	MSANTD2	Myb/SANT DNA binding domain containing 2
78	81	hsa-miR-193b-3p	SRSF2	serine and arginine rich splicing factor 2
79	81	hsa-miR-193b-3p	ZBTB25	zinc finger and BTB domain containing 25
80	81	hsa-miR-193b-3p	AJUBA	ajuba LIM protein
81	81	hsa-miR-193b-3p	PLXNC1	plexin C1
82	80	hsa-miR-193b-3p	ABCB8	ATP binding cassette subfamily B member 8
83	80	hsa-miR-193b-3p	NF2	neurofibromin 2
84	80	hsa-miR-193b-3p	USP53	ubiquitin specific peptidase 53
85	79	hsa-miR-193b-3p	TGFB2	transforming growth factor beta 2
86	79	hsa-miR-193b-3p	TNFRSF21	TNF receptor superfamily member 21
87	79	hsa-miR-193b-3p	ERBIN	erbb2 interacting protein
88	79	hsa-miR-193b-3p	KLF7	Kruppel like factor 7
89	79	hsa-miR-193b-3p	FAM122C	family with sequence similarity 122C
90	79	hsa-miR-193b-3p	NSF	N-ethylmaleimide sensitive factor, vesicle fusing ATPase
91	78	hsa-miR-193b-3p	TP53INP1	tumor protein p53 inducible nuclear protein 1
92	78	hsa-miR-193b-3p	MCL1	MCL1, BCL2 family apoptosis regulator
93	77	hsa-miR-193b-3p	PTPN9	protein tyrosine phosphatase, non-receptor type 9
94	77	hsa-miR-193b-3p	SLC39A5	solute carrier family 39 member 5
95	77	hsa-miR-193b-3p	CLSTN1	calsyntenin 1
96	77	hsa-miR-193b-3p	SKAP2	src kinase associated phosphoprotein 2
97	77	hsa-miR-193b-3p	TMEM30A	transmembrane protein 30A
98	77	hsa-miR-193b-3p	H2AFJ	H2A histone family member J
99	77	hsa-miR-193b-3p	ADCY9	adenylate cyclase 9
100	76	hsa-miR-193b-3p	FCHSD2	FCH and double SH3 domains 2
101	76	hsa-miR-193b-3p	AFF4	AF4/FMR2 family member 4
102	76	hsa-miR-193b-3p	F9	coagulation factor IX
103	76	hsa-miR-193b-3p	RALGAPB	Ral GTPase activating protein non-catalytic beta subunit
104	75	hsa-miR-193b-3p	RTN4IP1	reticulon 4 interacting protein 1
105	75	hsa-miR-193b-3p	ING5	inhibitor of growth family member 5
106	75	hsa-miR-193b-3p	POLR2J3	RNA polymerase II subunit J3
107	75	hsa-miR-193b-3p	TBL1XR1	transducin beta like 1 X-linked receptor 1
108	75	hsa-miR-193b-3p	MARCKSL1	MARCKS like 1
109	75	hsa-miR-193b-3p	SLC20A2	solute carrier family 20 member 2
110	75	hsa-miR-193b-3p	45903	septin 3
111	74	hsa-miR-193b-3p	DIO2	iodothyronine deiodinase 2
112	74	hsa-miR-193b-3p	ARMC1	armadillo repeat containing 1
113	74	hsa-miR-193b-3p	ANK3	ankyrin 3
114	74	hsa-miR-193b-3p	SLC23A2	solute carrier family 23 member 2
115	74	hsa-miR-193b-3p	PER3	period circadian regulator 3
116	74	hsa-miR-193b-3p	LRRC8A	leucine rich repeat containing 8 VRAC subunit A
117	74	hsa-miR-193b-3p	TRIB2	tribbles pseudokinase 2
118	74	hsa-miR-193b-3p	BAZ2A	bromodomain adjacent to zinc finger domain 2A
119	73	hsa-miR-193b-3p	ATXN1	ataxin 1
120	73	hsa-miR-193b-3p	ADAMTSL3	ADAMTS like 3
121	73	hsa-miR-193b-3p	LIMS1	LIM zinc finger domain containing 1
122	73	hsa-miR-193b-3p	CAB39	calcium binding protein 39
123	73	hsa-miR-193b-3p	TXLNA	taxilin alpha
124	73	hsa-miR-193b-3p	COMMD9	COMM domain containing 9
125	73	hsa-miR-193b-3p	DLST	dihydrolipoamide S-succinyltransferase
126	73	hsa-miR-193b-3p	ZNF582	zinc finger protein 582
127	73	hsa-miR-193b-3p	E2F6	E2F transcription factor 6
128	73	hsa-miR-193b-3p	NQO2	N-ribosyldihydronicotinamide:quinone reductase 2
129	73	hsa-miR-193b-3p	PDCD2	programmed cell death 2
130	73	hsa-miR-193b-3p	IRF2BPL	interferon regulatory factor 2 binding protein like
131	73	hsa-miR-193b-3p	ARID3B	AT-rich interaction domain 3B
132	73	hsa-miR-193b-3p	KMT2A	lysine methyltransferase 2A
133	72	hsa-miR-193b-3p	NOVA1	NOVA alternative splicing regulator 1
134	72	hsa-miR-193b-3p	JMY	junction mediating and regulatory protein, p53 cofactor
135	72	hsa-miR-193b-3p	CHD2	chromodomain helicase DNA binding protein 2
136	72	hsa-miR-193b-3p	CAMTA1	calmodulin binding transcription activator 1
137	71	hsa-miR-193b-3p	CSTF1	cleavage stimulation factor subunit 1
138	71	hsa-miR-193b-3p	FLRT3	fibronectin leucine rich transmembrane protein 3
139	71	hsa-miR-193b-3p	PHF6	PHD finger protein 6
140	71	hsa-miR-193b-3p	RGL1	ral guanine nucleotide dissociation stimulator like 1
141	71	hsa-miR-193b-3p	KIAA1549L	KIAA1549 like
142	71	hsa-miR-193b-3p	KDM7A	lysine demethylase 7A
143	70	hsa-miR-193b-3p	FAM84A	family with sequence similarity 84 member A
144	70	hsa-miR-193b-3p	CECR2	CECR2, histone acetyl-lysine reader
145	70	hsa-miR-193b-3p	PSRC1	proline and serine rich coiled-coil 1
146	70	hsa-miR-193b-3p	MMP19	matrix metallopeptidase 19
147	70	hsa-miR-193b-3p	ALKBH5	alkB homolog 5, RNA demethylase
148	70	hsa-miR-193b-3p	PXYLP1	2-phosphoxylose phosphatase 1
149	69	hsa-miR-193b-3p	DCTN5	dynactin subunit 5
150	69	hsa-miR-193b-3p	ZBTB6	zinc finger and BTB domain containing 6
151	69	hsa-miR-193b-3p	R3HDM1	R3H domain containing 1
152	69	hsa-miR-193b-3p	TMPPE	transmembrane protein with metallophosphoesterase domain
153	69	hsa-miR-193b-3p	RSF1	remodeling and spacing factor 1
154	69	hsa-miR-193b-3p	ZNF37A	zinc finger protein 37A
155	69	hsa-miR-193b-3p	NECAP2	NECAP endocytosis associated 2
156	69	hsa-miR-193b-3p	ZNF71	zinc finger protein 71
157	69	hsa-miR-193b-3p	ZNF385B	zinc finger protein 385B
158	69	hsa-miR-193b-3p	DEF8	differentially expressed in FDCP 8 homolog
159	68	hsa-miR-193b-3p	LPAR1	lysophosphatidic acid receptor 1
160	68	hsa-miR-193b-3p	EIF2AK1	eukaryotic translation initiation factor 2 alpha kinase 1
161	68	hsa-miR-193b-3p	SLC10A7	solute carrier family 10 member 7
162	68	hsa-miR-193b-3p	ANKRD13A	ankyrin repeat domain 13A
163	67	hsa-miR-193b-3p	RAB6B	RAB6B, member RAS oncogene family
164	67	hsa-miR-193b-3p	SIRT7	sirtuin 7
165	67	hsa-miR-193b-3p	ING1	inhibitor of growth family member 1
166	66	hsa-miR-193b-3p	MYCN	MYCN proto-oncogene, bHLH transcription factor
167	66	hsa-miR-193b-3p	CAPRIN1	cell cycle associated protein 1
168	66	hsa-miR-193b-3p	RPL27A	ribosomal protein L27a
169	66	hsa-miR-193b-3p	DOK6	docking protein 6
170	66	hsa-miR-193b-3p	CHST9	carbohydrate sulfotransferase 9
171	66	hsa-miR-193b-3p	ZBTB5	zinc finger and BTB domain containing 5
172	66	hsa-miR-193b-3p	NRIP1	nuclear receptor interacting protein 1
173	65	hsa-miR-193b-3p	ZNF710	zinc finger protein 710
174	65	hsa-miR-193b-3p	TAF7L	TATA-box binding protein associated factor 7 like
175	65	hsa-miR-193b-3p	GNAO1	G protein subunit alpha o1
176	65	hsa-miR-193b-3p	RSRC2	arginine and serine rich coiled-coil 2
177	65	hsa-miR-193b-3p	CD244	CD244 molecule
178	65	hsa-miR-193b-3p	ZNF736	zinc finger protein 736
179	65	hsa-miR-193b-3p	XPNPEP1	X-prolyl aminopeptidase 1
180	65	hsa-miR-193b-3p	RNF222	ring finger protein 222
181	64	hsa-miR-193b-3p	PEX13	peroxisomal biogenesis factor 13
182	64	hsa-miR-193b-3p	PRR14L	proline rich 14 like
183	63	hsa-miR-193b-3p	IGF2BP1	insulin like growth factor 2 mRNA binding protein 1
184	63	hsa-miR-193b-3p	CKAP2L	cytoskeleton associated protein 2 like
185	63	hsa-miR-193b-3p	ZNF510	zinc finger protein 510
186	63	hsa-miR-193b-3p	CBFB	core-binding factor subunit beta
187	63	hsa-miR-193b-3p	HHAT	hedgehog acyltransferase
188	63	hsa-miR-193b-3p	MOCS2	molybdenum cofactor synthesis 2
189	63	hsa-miR-193b-3p	EN2	engrailed homeobox 2
190	62	hsa-miR-193b-3p	HACE1	HECT domain and ankyrin repeat containing E3 ubiquitin protein ligase 1
191	62	hsa-miR-193b-3p	PRKACB	protein kinase cAMP-activated catalytic subunit beta
192	62	hsa-miR-193b-3p	STMN1	stathmin 1
193	62	hsa-miR-193b-3p	UNC13C	unc-13 homolog C
194	62	hsa-miR-193b-3p	FAM114A2	family with sequence similarity 114 member A2
195	62	hsa-miR-193b-3p	SPOPL	speckle type BTB/POZ protein like
196	62	hsa-miR-193b-3p	STX16	syntaxin 16
197	62	hsa-miR-193b-3p	SCYL3	SCY1 like pseudokinase 3
198	62	hsa-miR-193b-3p	KCNQ5	potassium voltage-gated channel subfamily Q member 5
199	62	hsa-miR-193b-3p	ZBTB40	zinc finger and BTB domain containing 40
200	62	hsa-miR-193b-3p	MED21	mediator complex subunit 21
201	61	hsa-miR-193b-3p	OSTF1	osteoclast stimulating factor 1
202	61	hsa-miR-193b-3p	PHLDA2	pleckstrin homology like domain family A member 2
203	61	hsa-miR-193b-3p	ACVR2A	activin A receptor type 2A
204	61	hsa-miR-193b-3p	LPCAT1	lysophosphatidylcholine acyltransferase 1
205	61	hsa-miR-193b-3p	CTAG1A	cancer/testis antigen 1A
206	61	hsa-miR-193b-3p	SYT1	synaptotagmin 1
207	61	hsa-miR-193b-3p	CHTF8	chromosome transmission fidelity factor 8
208	61	hsa-miR-193b-3p	LOC388813	uncharacterized protein ENSP00000383407-like
209	61	hsa-miR-193b-3p	C16orf70	chromosome 16 open reading frame 70
210	61	hsa-miR-193b-3p	CLDN19	claudin 19
211	61	hsa-miR-193b-3p	NUP50	nucleoporin 50
212	61	hsa-miR-193b-3p	JADE2	jade family PHD finger 2
213	61	hsa-miR-193b-3p	USP32	ubiquitin specific peptidase 32
214	61	hsa-miR-193b-3p	TANGO2	transport and golgi organization 2 homolog
215	60	hsa-miR-193b-3p	SELENON	selenoprotein N
216	60	hsa-miR-193b-3p	ARHGAP19	Rho GTPase activating protein 19
217	60	hsa-miR-193b-3p	N4BP3	NEDD4 binding protein 3
218	60	hsa-miR-193b-3p	DENND5B	DENN domain containing 5B
219	60	hsa-miR-193b-3p	PLEKHA5	pleckstrin homology domain containing A5
220	60	hsa-miR-193b-3p	IBTK	inhibitor of Bruton tyrosine kinase
221	60	hsa-miR-193b-3p	USP6	ubiquitin specific peptidase 6
222	60	hsa-miR-193b-3p	ABCB10	ATP binding cassette subfamily B member 10
223	60	hsa-miR-193b-3p	TCF4	transcription factor 4
224	60	hsa-miR-193b-3p	MYO18B	myosin XVIIIB
225	60	hsa-miR-193b-3p	PAK4	p21 (RAC1) activated kinase 4
226	60	hsa-miR-193b-3p	MAPK8	mitogen-activated protein kinase 8
227	60	hsa-miR-193b-3p	ICOS	inducible T cell costimulator
228	60	hsa-miR-193b-3p	SMAP1	small ArfGAP 1
229	60	hsa-miR-193b-3p	SPX	spexin hormone
230	60	hsa-miR-193b-3p	DKK2	dickkopf WNT signaling pathway inhibitor 2
231	60	hsa-miR-193b-3p	HSBP1	heat shock factor binding protein 1
232	59	hsa-miR-193b-3p	ALCAM	activated leukocyte cell adhesion molecule
233	59	hsa-miR-193b-3p	MB21D2	Mab-21 domain containing 2
234	59	hsa-miR-193b-3p	CTAG2	cancer/testis antigen 2
235	59	hsa-miR-193b-3p	SVEP1	sushi, von Willebrand factor type A, EGF and pentraxin domain containing 1
236	59	hsa-miR-193b-3p	ALOX5	arachidonate 5-lipoxygenase
237	59	hsa-miR-193b-3p	MICAL2	microtubule associated monooxygenase, calponin and LIM domain containing 2
238	59	hsa-miR-193b-3p	STKLD1	serine/threonine kinase like domain containing 1
239	58	hsa-miR-193b-3p	NAGA	alpha-N-acetylgalactosaminidase
240	58	hsa-miR-193b-3p	ATF6	activating transcription factor 6
241	58	hsa-miR-193b-3p	TMEM63A	transmembrane protein 63A
242	58	hsa-miR-193b-3p	GARNL3	GTPase activating Rap/RanGAP domain like 3
243	58	hsa-miR-193b-3p	DAAM2	dishevelled associated activator of morphogenesis 2
244	58	hsa-miR-193b-3p	IDE	insulin degrading enzyme
245	58	hsa-miR-193b-3p	THUMPD2	THUMP domain containing 2
246	58	hsa-miR-193b-3p	EIF4EBP2	eukaryotic translation initiation factor 4E binding protein 2
247	58	hsa-miR-193b-3p	DUSP22	dual specificity phosphatase 22
248	58	hsa-miR-193b-3p	POLR2J2	RNA polymerase II subunit J2
249	57	hsa-miR-193b-3p	LDB1	LIM domain binding 1
250	57	hsa-miR-193b-3p	GBA2	glucosylceramidase beta 2
251	57	hsa-miR-193b-3p	EBAG9	estrogen receptor binding site associated, antigen, 9
252	57	hsa-miR-193b-3p	SCP2	sterol carrier protein 2
253	57	hsa-miR-193b-3p	WSB2	WD repeat and SOCS box containing 2
254	57	hsa-miR-193b-3p	SYF2	SYF2 pre-mRNA splicing factor
255	57	hsa-miR-193b-3p	SRSF6	serine and arginine rich splicing factor 6
256	57	hsa-miR-193b-3p	TNFAIP1	TNF alpha induced protein 1
257	57	hsa-miR-193b-3p	C5orf63	chromosome 5 open reading frame 63
258	57	hsa-miR-193b-3p	ZNF780B	zinc finger protein 780B
259	57	hsa-miR-193b-3p	ARFIP1	ADP ribosylation factor interacting protein 1
260	56	hsa-miR-193b-3p	PAK3	p21 (RAC1) activated kinase 3
261	56	hsa-miR-193b-3p	FARP1	FERM, ARH/RhoGEF and pleckstrin domain protein 1
262	56	hsa-miR-193b-3p	PLEKHA2	pleckstrin homology domain containing A2
263	56	hsa-miR-193b-3p	CALB1	calbindin 1
264	56	hsa-miR-193b-3p	TESK2	testis associated actin remodelling kinase 2
265	56	hsa-miR-193b-3p	NLGN1	neuroligin 1
266	56	hsa-miR-193b-3p	IFNAR1	interferon alpha and beta receptor subunit 1
267	55	hsa-miR-193b-3p	STARD7	StAR related lipid transfer domain containing 7
268	55	hsa-miR-193b-3p	MDH2	malate dehydrogenase 2
269	55	hsa-miR-193b-3p	ARNT	aryl hydrocarbon receptor nuclear translocator
270	55	hsa-miR-193b-3p	CTDSPL2	CTD small phosphatase like 2
271	55	hsa-miR-193b-3p	OLFM1	olfactomedin 1
272	55	hsa-miR-193b-3p	TPP1	tripeptidyl peptidase 1
273	55	hsa-miR-193b-3p	BRWD3	bromodomain and WD repeat domain containing 3
274	55	hsa-miR-193b-3p	TMEM104	transmembrane protein 104
275	55	hsa-miR-193b-3p	ABHD18	abhydrolase domain containing 18
276	55	hsa-miR-193b-3p	BICD2	BICD cargo adaptor 2
277	55	hsa-miR-193b-3p	ISLR2	immunoglobulin superfamily containing leucine rich repeat 2
278	55	hsa-miR-193b-3p	ELMO2	engulfment and cell motility 2
279	55	hsa-miR-193b-3p	TRIM62	tripartite motif containing 62
280	54	hsa-miR-193b-3p	VASH2	vasohibin 2
281	54	hsa-miR-193b-3p	SLC2A13	solute carrier family 2 member 13
282	54	hsa-miR-193b-3p	DHRS7B	dehydrogenase/reductase 7B
283	54	hsa-miR-193b-3p	TWISTNB	TWIST neighbor
284	54	hsa-miR-193b-3p	AQP7	aquaporin 7
285	54	hsa-miR-193b-3p	MGAT4A	alpha-1,3-mannosyl-glycoprotein 4-beta-N-acetylglucosaminyltransferase A
286	54	hsa-miR-193b-3p	DNAJB9	DnaJ heat shock protein family (Hsp40) member B9
287	54	hsa-miR-193b-3p	G6PC2	glucose-6-phosphatase catalytic subunit 2
288	54	hsa-miR-193b-3p	DDX43	DEAD-box helicase 43
289	54	hsa-miR-193b-3p	LPP	LIM domain containing preferred translocation partner in lipoma
290	54	hsa-miR-193b-3p	ZNF346	zinc finger protein 346
291	54	hsa-miR-193b-3p	CCNJL	cyclin J like
292	54	hsa-miR-193b-3p	TXNRD2	thioredoxin reductase 2
293	54	hsa-miR-193b-3p	SCIMP	SLP adaptor and CSK interacting membrane protein
294	53	hsa-miR-193b-3p	GDF11	growth differentiation factor 11
295	53	hsa-miR-193b-3p	ERC1	ELKS/RAB6-interacting/CAST family member 1
296	53	hsa-miR-193b-3p	HEMK1	HemK methyltransferase family member 1
297	53	hsa-miR-193b-3p	SLC9A7	solute carrier family 9 member A7
298	53	hsa-miR-193b-3p	C12orf74	chromosome 12 open reading frame 74
299	53	hsa-miR-193b-3p	SLC15A1	solute carrier family 15 member 1
300	53	hsa-miR-193b-3p	MKLN1	muskelin 1
301	52	hsa-miR-193b-3p	AQP2	aquaporin 2
302	52	hsa-miR-193b-3p	ZKSCAN2	zinc finger with KRAB and SCAN domains 2
303	52	hsa-miR-193b-3p	SLC30A7	solute carrier family 30 member 7
304	52	hsa-miR-193b-3p	NFATC4	nuclear factor of activated T cells 4
305	52	hsa-miR-193b-3p	CAMK2N2	calcium/calmodulin dependent protein kinase II inhibitor 2
306	52	hsa-miR-193b-3p	PRSS12	serine protease 12
307	52	hsa-miR-193b-3p	SHMT2	serine hydroxymethyltransferase 2
308	52	hsa-miR-193b-3p	PIK3R1	phosphoinositide-3-kinase regulatory subunit 1
309	52	hsa-miR-193b-3p	XPR1	xenotropic and polytropic retrovirus receptor 1
310	52	hsa-miR-193b-3p	SREK1IP1	SREK1 interacting protein 1
311	52	hsa-miR-193b-3p	USP13	ubiquitin specific peptidase 13
312	52	hsa-miR-193b-3p	MPPED2	metallophosphoesterase domain containing 2
313	52	hsa-miR-193b-3p	RHAG	Rh associated glycoprotein
314	52	hsa-miR-193b-3p	CSRNP1	cysteine and serine rich nuclear protein 1
315	52	hsa-miR-193b-3p	ARPC5	actin related protein 2/3 complex subunit 5
316	52	hsa-miR-193b-3p	KMT2E	lysine methyltransferase 2E
317	51	hsa-miR-193b-3p	SNX1	sorting nexin 1
318	51	hsa-miR-193b-3p	FAM126B	family with sequence similarity 126 member B
319	51	hsa-miR-193b-3p	SF3B1	splicing factor 3b subunit 1
320	51	hsa-miR-193b-3p	HYOU1	hypoxia up-regulated 1
321	51	hsa-miR-193b-3p	NIPA1	NIPA magnesium transporter 1
322	51	hsa-miR-193b-3p	CEP70	centrosomal protein 70
323	51	hsa-miR-193b-3p	HPRT1	hypoxanthine phosphoribosyltransferase 1
324	51	hsa-miR-193b-3p	UBA52	ubiquitin A-52 residue ribosomal protein fusion product 1
325	50	hsa-miR-193b-3p	RNH1	ribonuclease/angiogenin inhibitor 1
326	50	hsa-miR-193b-3p	DNAJC13	DnaJ heat shock protein family (Hsp40) member C13
327	50	hsa-miR-193b-3p	ST3GAL4	ST3 beta-galactoside alpha-2,3-sialyltransferase 4
328	50	hsa-miR-193b-3p	SNX27	sorting nexin family member 27
329	50	hsa-miR-193b-3p	SPECC1L	sperm antigen with calponin homology and coiled-coil domains 1 like
330	50	hsa-miR-193b-3p	AKAP4	A-kinase anchoring protein 4
331	50	hsa-miR-193b-3p	ADRA2B	adrenoceptor alpha 2B
332	50	hsa-miR-193b-3p	GSDMD	gasdermin D

## Sheet: miRWalk
Predicting downstream targets of miR-193b-3p
mirnaid	refseqid	genesymbol	duplex	start	end	bindingp	energy	seed	accessibility	au	phylopstem	phylopflank	me	number_of_pairings	binding_region_length	longest_consecutive_pairings	position	validated	TargetScan	miRDB
hsa-miR-193b-3p	NM_001349342	FOXP1	AACTGGCCCTCAAAGTCCCGCT#GGGAGTTAACGAGGGCTGAGTTC#(((((((((((.((.((((...#)))).))...))))))).)))).	3349	3372	0.9538461538461539	-23.8	1	7.955918e-05	0.647	0.3526046666666666	0.0971379	-8.01983	17	23	7	3UTR		0	0
hsa-miR-193b-3p	NM_015962	FCF1	AACTGGCCCTCAAAGTCCCGCT#GCGGGGGTTGGGGGG#......(((((((..((((((.#)))))).))))))).	866	881	0.9538461538461539	-23	0	3.677459e-05	0.456	-0.661145	0.005529487499999975	-17.1588	13	15	7	3UTR		0	0
hsa-miR-193b-3p	NM_001191323	GREM1	AACTGGCCCTCAAAGTCCCGCT#GGCAGAATTTTGAGGGTGGGA#..((.(((((((((((.(.(((#))).).))))))))))).)).	2624	2645	0.9538461538461539	-22.6	0	0.146346	0.588	1.371420818181818	1.85556	-9.07604	17	21	11	3UTR		1	0
hsa-miR-193b-3p	NM_001261413	DCTN2	AACTGGCCCTCAAAGTCCCGCT#AGTGGTAGCTAGGGGTTGGTTA#((((((((((...(((.(((((#)))))..))).)))))))))).	1505	1527	0.9538461538461539	-19.4	1	0.000298725	0.471	4.430255799999999	3.70136	-11.3983	18	22	10	3UTR		0	0
hsa-miR-193b-3p	NM_001278458	COBLL1	AACTGGCCCTCAAAGTCCCGCT#GGATTTAGGGGGCTATGTA#.((((((((((.((((((....#)))))).)))))))).)).	6200	6219	0.9538461538461539	-21.8	1	0.000198482	0.691	4.068891181818182	2.80491	-7.14013	16	19	8	3UTR		0	0
hsa-miR-193b-3p	NM_001286137	NQO1	AACTGGCCCTCAAAGTCCCGCT#GCTAAACTGATGACTTACTATGGGATGGGGTCCAGTC#.(((((((((....((((((..#.)))))))))).))))).	1830	1867	0.9538461538461539	-21.4	1	6.479049e-05	0.544	4.03427	3.1717590437500003	-12.1109	15	18	10	3UTR		0	0
hsa-miR-193b-3p	NM_207370	GPR153	AACTGGCCCTCAAAGTCCCGCT#GCGGGAGGGGCCAT#...(((((((.....((((((.#))))))))))))).	3754	3768	0.9538461538461539	-24.7	0	1.076255e-08	0.353	0	0	-15.5675	13	14	13	3UTR		0	0
hsa-miR-193b-3p	NM_001304508	ZBTB25	AACTGGCCCTCAAAGTCCCGCT#GGCGGCTGATGAGGTCCAGC#..((((.(((((.((..(((((#)))))))..))))).)))).	1063	1083	0.9538461538461539	-21.3	0	9.472812e-06	0.471	1.30118	1.3026249450000003	-8.02287	16	20	7	3UTR		0	1
hsa-miR-193b-3p	NM_001318508	FCF1	AACTGGCCCTCAAAGTCCCGCT#GCGGGGGTTGGGGGG#......(((((((..((((((.#)))))).))))))).	925	940	0.9538461538461539	-23	0	3.677459e-05	0.456	-0.661145	0.005529487499999975	-17.1588	13	15	7	3UTR		0	0
hsa-miR-193b-3p	NM_000612	IGF2	AACTGGCCCTCAAAGTCCCGCT#GGCGGTTGGAGGGGTGGGTGGGGGGCAGTGGGGGCTGGG#..((((((((((..(((((.(.#.).)))))..)))))))))).	3893	3932	0.9538461538461539	-29.7	1	0.00147541	0.265	0	0	-7.10297	16	21	10	3UTR		0	0
hsa-miR-193b-3p	NM_001347721	DYRK1A	AACTGGCCCTCAAAGTCCCGCT#GTGGGGATTATGGGGGCTAC#...(((((((((.((((((((.#))))).))).))))))))).	16155	16175	0.9615384615384616	-25.3	0	0.00261946	0.471	0.08071477777777777	-0.108617	-7.80367	17	20	9	3UTR		1	0
hsa-miR-193b-3p	NM_001347722	DYRK1A	AACTGGCCCTCAAAGTCCCGCT#GTGGGGATTATGGGGGCTAC#...(((((((((.((((((((.#))))).))).))))))))).	15412	15432	0.9615384615384616	-25.3	0	0.00261946	0.471	0.08071477777777777	-0.108617	-7.80367	17	20	9	3UTR		1	0
hsa-miR-193b-3p	NM_001347723	DYRK1A	AACTGGCCCTCAAAGTCCCGCT#GTGGGGATTATGGGGGCTAC#...(((((((((.((((((((.#))))).))).))))))))).	16069	16089	0.9615384615384616	-25.3	0	0.00261946	0.471	0	0	-7.80367	17	20	9	3UTR		1	0
hsa-miR-193b-3p	NM_001348991	NXPE3	AACTGGCCCTCAAAGTCCCGCT#AGCACTTTGGGAGGCCAGG#..((((((((((((((...(((#))))))))))).)))))).	4018	4037	0.9615384615384616	-24.3	1	1.808972e-06	0.441	0	0	-4.957	17	19	11	3UTR		0	0
hsa-miR-193b-3p	NM_001348998	NXPE3	AACTGGCCCTCAAAGTCCCGCT#AGCACTTTGGGAGGCCAGG#..((((((((((((((...(((#))))))))))).)))))).	3777	3796	0.9615384615384616	-24.3	1	1.808972e-06	0.441	0.05104859999999999	-0.0117301	-4.957	17	19	11	3UTR		0	0
hsa-miR-193b-3p	NM_001351447	IL1RL2	AACTGGCCCTCAAAGTCCCGCT#GGAGGGTGAGGGCTGGTC#.(((((((((((....(((.((#)).)))))))))))))).	1662	1680	0.9615384615384616	-23	1	0.00960251	0.353	0.4865020909090909	-0.22959	-6.90779	16	18	14	3UTR		0	0
hsa-miR-193b-3p	NM_001354564	NDRG2	AACTGGCCCTCAAAGTCCCGCT#GGGGGAGACTTGCTGGTGGGTTAGTG#.((((((((((((((((((.((#)).)).)))))..))).)))))))).	1629	1655	0.9615384615384616	-23.7	1	0.00110604	0.5	4.624187954545454	4.660998500000001	-3.79332	20	26	8	3UTR		0	0
hsa-miR-193b-3p	NM_001354924	IRF1	AACTGGCCCTCAAAGTCCCGCT#GGCCGGGCATGGTGGCTTATGCCTGTAATCCTGGCACTTTGGGAGGCCAA#...(((((((((((((.(((..#.))).)))))))).))))).	2386	2436	0.9615384615384616	-23.5	0	1.162015e-06	0.441	0	0	-6.51454	16	20	8	3UTR	MIRT727422	0	0
hsa-miR-193b-3p	NM_001354925	IRF1	AACTGGCCCTCAAAGTCCCGCT#GGCCGGGCATGGTGGCTTATGCCTGTAATCCTGGCACTTTGGGAGGCCAA#...(((((((((((((.(((..#.))).)))))))).))))).	2323	2373	0.9615384615384616	-23.5	0	1.162015e-06	0.441	0	0	-6.51454	16	20	8	3UTR	MIRT727422	0	0
hsa-miR-193b-3p	NM_001367639	SUN1	AACTGGCCCTCAAAGTCCCGCT#GGACTTTTGGAGGGCAGA#..((.(((((((((((((....#)))))))..)))))))).	2605	2623	0.9615384615384616	-21.2	0	5.419227e-07	0.588	0	0	-9.07604	15	18	8	3UTR	MIRT041459	0	0
hsa-miR-193b-3p	NM_001369057	DEFB112	AACTGGCCCTCAAAGTCCCGCT#TGGGACCGCTAAGTTTAGTGAGATTCTGGGGCCAA#...((((((.((.((((.((((#.)))).)))).)))))))).	581	616	0.9615384615384616	-21.3	0	0.00914306	0.618	0	0	-9.04618	16	20	8	3UTR		0	0
hsa-miR-193b-3p	XM_047416331	CBR4	AACTGGCCCTCAAAGTCCCGCT#GGATCTTGAGCTCCAGA#..((((..(((((.((((....#)))).)))))..)))).	730	747	0.9615384615384616	-17	0	0.00118787	0.603	0	0	-9.67116	13	17	5	3UTR		0	0
hsa-miR-193b-3p	XM_047417258	SAR1B	AACTGGCCCTCAAAGTCCCGCT#GTGGGATTGGCCT#....((((.....((((((((.#)))))))))))).	1232	1245	0.9615384615384616	-18.7	0	4.095678e-05	0.515	0	0	-19.3062	12	13	12	3UTR		0	0
hsa-miR-193b-3p	XM_047439070	PRKACA	AACTGGCCCTCAAAGTCCCGCT#TGGGCTTTGAAAGCCAGA#..(((((..((((((.((((..#))))))))))..))))).	1711	1729	0.9615384615384616	-22.1	0	1.35181e-05	0.441	0	0	-8.56007	15	18	10	3UTR		0	0
hsa-miR-193b-3p	NM_172083	CAMK2B	AACTGGCCCTCAAAGTCCCGCT#AGTGGGAGTGCCTTTGGAATCTGGGCCGGG#..((((((((((((((((((((#)))))))....)))))).....))))))).	2882	2912	0.9615384615384616	-27.7	1	0.000321779	0.456	3.340923062068967	2.9519724825000004	-4.957	20	30	7	3UTR		0	0
hsa-miR-193b-3p	NM_173566	PRR14L	AACTGGCCCTCAAAGTCCCGCT#AGTGGGATCTCAAAAATCCCCAGCCAGCCTTCTTTGAGGGCCAC#...(((((((((((((((((((#)))))))........................)))))))))))).	7849	7893	0.9615384615384616	-30.2	0	1.311871e-06	0.471	0	0	-6.51454	19	44	12	3UTR		1	1
hsa-miR-193b-3p	NM_173625	C17orf78	AACTGGCCCTCAAAGTCCCGCT#AGTGGGACTCCTGATCTCCCTGGTTG#((((((...(((.(((((((((#)))))))))..))).....)))))).	1353	1379	0.9615384615384616	-18.5	0	0.0147295	0.588	0.13839861111111113	0.05435749749999996	-10.1404	18	26	9	3UTR		0	0
hsa-miR-193b-3p	NM_177996	EPB41L1	AACTGGCCCTCAAAGTCCCGCT#GGTGGGAGGGGAGGGCGGA#...(.((((((....(((((((#)))))))...)))))).).	4596	4615	0.9615384615384616	-25.2	0	0.0112011	0.426	0.4830728571428572	0.23782735749999998	-16.8618	14	19	7	3UTR		0	0
hsa-miR-193b-3p	NM_183006	DLGAP4	AACTGGCCCTCAAAGTCCCGCT#AGCGGCTTTCTGGGTCTCAGCCCTCTCTGCGGTTGAGGGCCCAGA#..(((((((((((....((((.#.))))))))))))).)).	2637	2682	0.9615384615384616	-24.4	1	0.000319648	0.382	1.6261550083333332	0.4161689251249999	-6.78234	15	18	13	3UTR		0	0
hsa-miR-193b-3p	NM_201535	NDRG2	AACTGGCCCTCAAAGTCCCGCT#GGGGGAGACTTGCTGGTGGGTTAGTG#.((((((((((((((((((.((#)).)).)))))..))).)))))))).	1743	1769	0.9615384615384616	-23.7	1	0.00110604	0.5	5.918199772727274	4.3189424372500005	-3.79332	20	26	8	3UTR		0	0
hsa-miR-193b-3p	NM_201538	NDRG2	AACTGGCCCTCAAAGTCCCGCT#GGGGGAGACTTGCTGGTGGGTTAGTG#.((((((((((((((((((.((#)).)).)))))..))).)))))))).	1591	1617	0.9615384615384616	-23.7	1	0.00110604	0.5	5.250535454545454	4.25304	-3.79332	20	26	8	3UTR		0	0
hsa-miR-193b-3p	NM_201539	NDRG2	AACTGGCCCTCAAAGTCCCGCT#GGGGGAGACTTGCTGGTGGGTTAGTG#.((((((((((((((((((.((#)).)).)))))..))).)))))))).	1633	1659	0.9615384615384616	-23.7	1	0.00110604	0.5	4.624187954545454	4.660998500000001	-3.79332	20	26	8	3UTR		0	0
hsa-miR-193b-3p	NM_201541	NDRG2	AACTGGCCCTCAAAGTCCCGCT#GGGGGAGACTTGCTGGTGGGTTAGTG#.((((((((((((((((((.((#)).)).)))))..))).)))))))).	1658	1684	0.9615384615384616	-23.7	1	0.00110604	0.5	4.602483954545455	3.9473555750000004	-3.79332	20	26	8	3UTR		0	0
hsa-miR-193b-3p	NM_001371193	CCL24	AACTGGCCCTCAAAGTCCCGCT#TGGGGTGAAGGGCCAGC#..((((((((((...(((((..#)))))))).))))))).	1140	1157	0.9615384615384616	-22.6	1	1.468323e-05	0.515	0	0	-7.83842	15	17	8	3UTR		0	0
hsa-miR-193b-3p	NM_001394334	SNURF	AACTGGCCCTCAAAGTCCCGCT#GCTTTCGAAAAATAAAGGGCCAGTTA#((((((((((............#.)))))))))).	817	843	0.9615384615384616	-19	1	0.151098	0.721	0	0	-13.2236	10	12	10	3UTR		0	0
hsa-miR-193b-3p	NM_001400021	G3BP2	AACTGGCCCTCAAAGTCCCGCT#GTGGGGAGAGGGAAGGAGGAAGTCAGTTA#(((((((((((....((((.((#.)).))))..))))..))))))).	2678	2707	0.9615384615384616	-21.2	1	0.010163	0.544	0	0	-10.1658	17	24	7	3UTR		0	0
hsa-miR-193b-3p	NM_001400022	G3BP2	AACTGGCCCTCAAAGTCCCGCT#GTGGGGAGAGGGAAGGAGGAAGTCAGTTA#(((((((((((....((((.((#.)).))))..))))..))))))).	2579	2608	0.9615384615384616	-21.2	1	0.010163	0.544	0	0	-10.1658	17	24	7	3UTR		0	0
hsa-miR-193b-3p	NM_014746	RNF144A	AACTGGCCCTCAAAGTCCCGCT#GGCCTCTTGGCAGAGGCTGGAGGACTCTGGGGGCTAGG#..((((((((((.(((((((((#.)))..).))))).)))))))))).	2274	2312	0.9615384615384616	-28.5	1	4.431958e-05	0.441	-0.0118205	-0.235557	-6.24613	19	25	10	3UTR		0	0
hsa-miR-193b-3p	NM_015275	WASHC4	AACTGGCCCTCAAAGTCCCGCT#GCCTGGACTTGAGGGTA#.....((((((.((((((.((.#))..)))))))))))).	3808	3825	0.9615384615384616	-21.6	0	0.000297365	0.676	0.8076530000000001	0.44528719000000005	-17.0124	14	17	12	3UTR		0	0
hsa-miR-193b-3p	NM_015920	RPS27L	AACTGGCCCTCAAAGTCCCGCT#GTGGGAATCTTTAGAGGGCCAT#...((((((((((((((((((.#))))))..)))).)))))))).	4649	4671	0.9615384615384616	-29.1	0	0.00899694	0.574	0	0	-6.51454	18	22	8	3UTR		0	0
hsa-miR-193b-3p	NM_016103	SAR1B	AACTGGCCCTCAAAGTCCCGCT#GTGGGATTGGCCT#....((((.....((((((((.#)))))))))))).	1510	1523	0.9615384615384616	-18.7	0	4.095678e-05	0.515	-0.129091	-0.086789	-19.3062	12	13	12	3UTR		0	0
hsa-miR-193b-3p	NM_017733	PIGG	AACTGGCCCTCAAAGTCCCGCT#AGCACTTTGGGAGGCCAGA#..((((((((((((((...(((#))))))))))).)))))).	3599	3618	0.9615384615384616	-23.8	1	9.179432e-07	0.5	0	0	-4.957	17	19	11	3UTR		0	0
hsa-miR-193b-3p	NM_001256629	BRSK2	AACTGGCCCTCAAAGTCCCGCT#GCTGGGGCAGGGCCAGG#..((((((((....(((((((.#)).))))))))))))).	3205	3222	0.9615384615384616	-26.8	1	4.074449e-06	0.353	0.248847	0.5817293037499996	-13.2745	15	17	13	3UTR		0	0
hsa-miR-193b-3p	NM_001256630	BRSK2	AACTGGCCCTCAAAGTCCCGCT#GCTGGGGCAGGGCCAGG#..((((((((....(((((((.#)).))))))))))))).	3620	3637	0.9615384615384616	-26.8	1	4.074449e-06	0.353	0.248847	0.5817293037499996	-13.2745	15	17	13	3UTR		0	0
hsa-miR-193b-3p	NM_001257180	SLC20A2	AACTGGCCCTCAAAGTCCCGCT#AGCAGGGGAATCATTGGCCAGTG#.(((((((.......(((((((#))).)))).......))))))).	3124	3147	0.9615384615384616	-21.8	1	0.00128305	0.529	6.39401	5.252833696249998	-15.1452	14	23	7	3UTR		0	1
hsa-miR-193b-3p	NM_001257181	SLC20A2	AACTGGCCCTCAAAGTCCCGCT#AGCAGGGGAATCATTGGCCAGTG#.(((((((.......(((((((#))).)))).......))))))).	2984	3007	0.9615384615384616	-21.8	1	0.00128305	0.529	5.5607162500000005	5.547264553749999	-15.1452	14	23	7	3UTR		0	1
hsa-miR-193b-3p	NM_001258329	EPB41L1	AACTGGCCCTCAAAGTCCCGCT#GGTGGGAGGGGAGGGCGGA#...(.((((((....(((((((#)))))))...)))))).).	4956	4975	0.9615384615384616	-25.2	0	0.0112011	0.426	0.4830728571428572	0.23782735749999998	-16.8618	14	19	7	3UTR		0	0
hsa-miR-193b-3p	NM_001258330	EPB41L1	AACTGGCCCTCAAAGTCCCGCT#GGTGGGAGGGGAGGGCGGA#...(.((((((....(((((((#)))))))...)))))).).	4374	4393	0.9615384615384616	-25.2	0	0.0112011	0.426	0.4830728571428572	0.23782735749999998	-16.8618	14	19	7	3UTR		0	0
hsa-miR-193b-3p	NM_001258331	EPB41L1	AACTGGCCCTCAAAGTCCCGCT#GGTGGGAGGGGAGGGCGGA#...(.((((((....(((((((#)))))))...)))))).).	4691	4710	0.9615384615384616	-25.2	0	0.0112011	0.426	0.4830728571428572	0.23782735749999998	-16.8618	14	19	7	3UTR		0	0
hsa-miR-193b-3p	NM_001267706	CD274	AACTGGCCCTCAAAGTCCCGCT#AGCAAATCATCCATTGCTCATCCTAGGAAGACGGGTTGAGAATCCCTAATTTGAGGGTCAGTTC#((((((((((((((..((((((#.)).))))..............)))))))))))))).	890	954	0.9615384615384616	-27.2	1	3.653212e-05	0.485	-0.0575837	-0.0717447	-4.90607	20	37	14	3UTR		0	0
hsa-miR-193b-3p	NM_001280789	SURF4	AACTGGCCCTCAAAGTCCCGCT#GTGGGGGTACAGGAGGGGGCCT#....(((((((..(.((((((.#)))))).)......))))))).	854	876	0.9615384615384616	-22.5	0	1.50742e-05	0.515	0	0	-14.9179	14	22	7	3UTR	MIRT016415	0	0
hsa-miR-193b-3p	NM_001280790	SURF4	AACTGGCCCTCAAAGTCCCGCT#GTGGGGGTACAGGAGGGGGCCT#....(((((((..(.((((((.#)))))).)......))))))).	1363	1385	0.9615384615384616	-22.5	0	1.50742e-05	0.515	0	0	-14.9179	14	22	7	3UTR	MIRT016415	0	0
hsa-miR-193b-3p	NM_001282211	NDRG2	AACTGGCCCTCAAAGTCCCGCT#GGGGGAGACTTGCTGGTGGGTTAGTG#.((((((((((((((((((.((#)).)).)))))..))).)))))))).	1603	1629	0.9615384615384616	-23.7	1	0.00110604	0.5	3.6870217272727275	4.56571	-3.79332	20	26	8	3UTR		0	0
hsa-miR-193b-3p	NM_001282211	NDRG2	AACTGGCCCTCAAAGTCCCGCT#GGAGGGGATTTGGGGCTGGG#..((((((((..(((((((.((#.))))))))))))))))).	1502	1522	0.9615384615384616	-23.1	1	8.893732e-05	0.441	4.51822	3.22771	-11.1286	17	19	17	3UTR		0	0
hsa-miR-193b-3p	NM_001282218	BRSK2	AACTGGCCCTCAAAGTCCCGCT#GCTGGGGCAGGGCCAGG#..((((((((....(((((((.#)).))))))))))))).	3200	3217	0.9615384615384616	-26.8	1	4.074449e-06	0.353	0.248847	0.5817293037499996	-13.2745	15	17	13	3UTR		0	0
hsa-miR-193b-3p	NM_001286563	GRAMD1B	AACTGGCCCTCAAAGTCCCGCT#GGCCTGGGGCTTGGGTGCCACGTG#.((((((.(((.((((((((((#)))..)))))))))).)))).)).	7431	7455	0.9615384615384616	-22.9	1	4.231046e-06	0.441	0.13098406666666668	0.606854	-9.45376	19	24	10	3UTR		0	0
hsa-miR-193b-3p	NM_001286564	GRAMD1B	AACTGGCCCTCAAAGTCCCGCT#GGCCTGGGGCTTGGGTGCCACGTG#.((((((.(((.((((((((((#)))..)))))))))).)))).)).	7130	7154	0.9615384615384616	-22.9	1	4.231046e-06	0.441	0.13098406666666668	0.606854	-9.45376	19	24	10	3UTR		0	0
hsa-miR-193b-3p	NM_001287142	TPD52	AACTGGCCCTCAAAGTCCCGCT#GGTGGGTATTGGGGGTGGC#...(.((((((((...((((((#))))))..)))))))).).	3087	3106	0.9615384615384616	-21.6	0	0.0162764	0.544	0.9476003375000002	1.3761734637499998	-12.4589	15	19	8	3UTR		0	0
hsa-miR-193b-3p	NM_001287246	BLM	AACTGGCCCTCAAAGTCCCGCT#AGCACTTTGGGAGGCCGAGG#..((((((((((((((...(((#))))))))))).)))).)).	5013	5033	0.9615384615384616	-20.5	1	5.703674e-07	0.368	0	0	-4.957	17	20	11	3UTR	MIRT016590	0	0
hsa-miR-193b-3p	NM_001289051	PIGG	AACTGGCCCTCAAAGTCCCGCT#AGCACTTTGGGAGGCCAGA#..((((((((((((((...(((#))))))))))).)))))).	3432	3451	0.9615384615384616	-23.8	1	9.179432e-07	0.5	0	0	-4.957	17	19	11	3UTR		0	0
hsa-miR-193b-3p	NM_001289052	PIGG	AACTGGCCCTCAAAGTCCCGCT#AGCACTTTGGGAGGCCAGA#..((((((((((((((...(((#))))))))))).)))))).	3224	3243	0.9615384615384616	-23.8	1	9.179432e-07	0.5	0	0	-4.957	17	19	11	3UTR		0	0
hsa-miR-193b-3p	NM_020716	GRAMD1B	AACTGGCCCTCAAAGTCCCGCT#GGCCTGGGGCTTGGGTGCCACGTG#.((((((.(((.((((((((((#)))..)))))))))).)))).)).	7410	7434	0.9615384615384616	-22.9	1	4.231046e-06	0.441	0.13098406666666668	0.606854	-9.45376	19	24	10	3UTR		0	0
hsa-miR-193b-3p	NM_024508	ZBED2	AACTGGCCCTCAAAGTCCCGCT#GGTGGAGCTGACGATTTTGAGGGCTGAGG#..((((((((((((((((((((#))))).......))))))))))))).)).	1911	1940	0.9615384615384616	-25.9	1	0.00115051	0.485	-0.274133	-0.0552984	-4.957	20	29	13	3UTR		0	0
hsa-miR-193b-3p	NM_025061	LRRC8E	AACTGGCCCTCAAAGTCCCGCT#AGGAGGTTTGGTTGGGGGCCAGG#..(((((((((((...((..((#))..)).....))))))))))).	3058	3081	0.9615384615384616	-24.1	1	1.894848e-05	0.5	0.5656133636363637	0.46422847750000007	-6.78234	15	23	11	3UTR		0	0
hsa-miR-193b-3p	NM_001144830	FMO5	AACTGGCCCTCAAAGTCCCGCT#AGTGGGATGGGGCTC#....((((((....((((((((#)))))))))))))).	1395	1410	0.9615384615384616	-21.4	0	0.00607587	0.456	3.8599787500000002	2.99273	-17.8641	14	15	14	3UTR		0	0
hsa-miR-193b-3p	NM_001146008	SLCO5A1	AACTGGCCCTCAAAGTCCCGCT#TGGGATGATTGGGCCAGA#..(((((((.....((((((..#))))))....))))))).	5439	5457	0.9615384615384616	-24.2	1	9.904093e-06	0.529	1.6415258571428573	1.3213	-14.5171	13	18	7	3UTR		0	0
hsa-miR-193b-3p	NM_001161501	ZNF611	AACTGGCCCTCAAAGTCCCGCT#GGGATATGAGGCCAGG#..((((.(((((..(((((...#))))).))))))))).	3293	3309	0.9615384615384616	-22.9	0	0.00294137	0.588	1.0349179999999998	-1.45742	-8.64666	14	16	9	3UTR		0	0
hsa-miR-193b-3p	NM_001162536	RBMXL1	AACTGGCCCTCAAAGTCCCGCT#GGTACTTTTTGGCCAGTTG#((((((((...(((((.((...#)).)))))..)))))))).	4623	4642	0.9615384615384616	-20	1	0.00278922	0.618	0.580247	0.9559898774999999	-9.06125	15	19	8	3UTR		0	1
hsa-miR-193b-3p	NM_001167911	VEPH1	AACTGGCCCTCAAAGTCCCGCT#GCCCTCAGATAGTGTGGGGCCAGG#..((((((((((..(((.....#.)))..)).)))))))).	2918	2942	0.9615384615384616	-19.8	1	0.000352917	0.515	2.7465549636363633	2.3004039849999995	-7.10297	13	18	8	3UTR		0	0
hsa-miR-193b-3p	NM_001167912	VEPH1	AACTGGCCCTCAAAGTCCCGCT#GCCCTCAGATAGTGTGGGGCCAGG#..((((((((((..(((.....#.)))..)).)))))))).	3053	3077	0.9615384615384616	-19.8	1	0.000352917	0.515	2.7465549636363633	2.3004039849999995	-7.10297	13	18	8	3UTR		0	0
hsa-miR-193b-3p	NM_001177591	PPP2R2A	AACTGGCCCTCAAAGTCCCGCT#AGTCAGTTTGGGGTCAGTG#.((((((((.((((.(...(((#))).).)))))))))))).	1976	1995	0.9615384615384616	-18	1	0.0248469	0.603	4.483795000000001	3.30677	-5.77128	16	19	12	3UTR		0	0
hsa-miR-193b-3p	NM_004837	GGPS1	AACTGGCCCTCAAAGTCCCGCT#AGCACTTTGGGAGGCCGAGG#..((((((((((((((...(((#))))))))))).)))).)).	1668	1688	0.9615384615384616	-20.5	1	2.330775e-06	0.368	0	0	-4.957	17	20	11	3UTR		0	0
hsa-miR-193b-3p	NM_005433	YES1	AACTGGCCCTCAAAGTCCCGCT#GCATGGACATGGGCCAGG#..(((((((.....((((.((.#))..))))..))))))).	2299	2317	0.9615384615384616	-21.9	1	0.0020846	0.647	1.64278	0.713427	-14.5171	13	18	7	3UTR		0	0
hsa-miR-193b-3p	NM_005888	SLC25A3	AACTGGCCCTCAAAGTCCCGCT#GGCTGGGATTAGAGGGCTGAGC#..(((((((((..(((((((((#))).)))))).))))))).)).	4646	4668	0.9615384615384616	-24.5	1	9.125605e-06	0.485	0	0	-9.59293	18	22	7	3UTR		0	0
hsa-miR-193b-3p	NM_006391	IPO7	AACTGGCCCTCAAAGTCCCGCT#AGCGGGATTTTGGGGGTGGGG#..((.(((((((((((((((((#))))))))))))))))).)).	3406	3427	0.9615384615384616	-35.3	0	0.00510201	0.441	1.4416867529411759	2.34699	-9.07604	19	21	17	3UTR		0	0
hsa-miR-193b-3p	NM_006547	IGF2BP3	AACTGGCCCTCAAAGTCCCGCT#AGTGGTCGCAGGAGATTTTGGAACGGCTGGTTT#((((((((.((((((((((((.#.)).)).))))))))...)))))))).	3010	3043	0.9615384615384616	-22.2	1	0.00546665	0.574	5.2179560714285715	5.43427	-4.99396	20	27	8	3UTR		0	0
hsa-miR-193b-3p	NM_007054	KIF3A	AACTGGCCCTCAAAGTCCCGCT#GCAGGGAAGTTGGGGGAACAGTTC#(((((.(((((((..((((((.#)).))))..)))))))..))))).	2467	2491	0.9615384615384616	-25.4	0	0.0044636	0.603	0.10597642857142854	0.466836	-7.43082	18	24	7	3UTR		0	0
hsa-miR-193b-3p	NM_007076	FICD	AACTGGCCCTCAAAGTCCCGCT#GTGGGACGGGGCCCAGA#..((((((((....(((((((.#))))))))))))).)).	1868	1885	0.9615384615384616	-25	1	3.29605e-06	0.368	-0.296002	0.13290304249999985	-13.2745	15	17	13	3UTR		0	0
hsa-miR-193b-3p	NM_007107	SSR3	AACTGGCCCTCAAAGTCCCGCT#AGCAGAGGAATTAATAGATTAGGAGGGTCTTTTGGGGGGTTGGTTT#(((((((((((((((.(((.((#.)).))).))))..))))))))))).	4118	4164	0.9615384615384616	-23.4	1	0.000814119	0.588	4.62948505882353	4.852752198749998	-4.17062	20	26	11	3UTR		0	0
hsa-miR-193b-3p	NM_007137	ZNF81	AACTGGCCCTCAAAGTCCCGCT#GGCCATGAATCCCTGGGTCTTGAGGGTGGGA#..((.((((((.(((.((((..#.)))).))))))))).)).	6003	6034	0.9615384615384616	-23.5	0	1.310719e-05	0.5	1.0457457666666665	0.07337348124999998	-12.6559	15	19	9	3UTR		0	0
hsa-miR-193b-3p	NM_007220	CA5B	AACTGGCCCTCAAAGTCCCGCT#GGCGGGTAGCTCACTTGAGGTCAGG#..((((.(((((((((((((((#))))))..)))...)))))))))).	1985	2010	0.9615384615384616	-23.8	0	9.231579e-05	0.426	-0.0530949	0.0008661024999999656	-6.50069	19	25	10	3UTR		0	0
hsa-miR-193b-3p	NM_012123	MTO1	AACTGGCCCTCAAAGTCCCGCT#AGCACTTTGGGAGGCCAGG#..((((((((((((((...(((#))))))))))).)))))).	6103	6122	0.9615384615384616	-24.3	1	2.536944e-07	0.441	0.08081573333333335	0.04252781874999999	-4.957	17	19	11	3UTR		0	0
hsa-miR-193b-3p	NM_012156	EPB41L1	AACTGGCCCTCAAAGTCCCGCT#GGTGGGAGGGGAGGGCGGA#...(.((((((....(((((((#)))))))...)))))).).	4905	4924	0.9615384615384616	-25.2	0	0.0112011	0.426	0.4830728571428572	0.23782735749999998	-16.8618	14	19	7	3UTR		0	0
hsa-miR-193b-3p	NM_012308	KDM2A	AACTGGCCCTCAAAGTCCCGCT#TGGGGTTGAAACTTTGAGGAAATGCCAGTG#.(((((((((((((((((((..#))))......)))))))))....)))))).	6216	6246	0.9615384615384616	-25.1	1	0.0225486	0.544	1.5812600303448276	1.6573438362500001	-3.79332	19	30	9	3UTR		0	0
hsa-miR-193b-3p	NM_001632	ALPP	AACTGGCCCTCAAAGTCCCGCT#GTGGGACTTGAGGACTCGGG#..((((.((((.(((((((((.#))))))))))))).).))).	2046	2066	0.9615384615384616	-25.4	0	0.000940479	0.456	3.5547044555555556	3.3403643825000002	-9.84749	17	20	13	3UTR		0	0
hsa-miR-193b-3p	NM_001724	BPGM	AACTGGCCCTCAAAGTCCCGCT#AGTGGGGCTTAATGAAGGTCAT#...(((((.(((((((((((((#))))))))))..))).))))).	1168	1190	0.9615384615384616	-24.2	0	0.0018903	0.588	3.8787152000000007	4.7709889937500005	-7.57093	18	22	10	3UTR		0	0
hsa-miR-193b-3p	NM_002198	IRF1	AACTGGCCCTCAAAGTCCCGCT#GGCCGGGCATGGTGGCTTATGCCTGTAATCCTGGCACTTTGGGAGGCCAA#...(((((((((((((.(((..#.))).)))))))).))))).	2509	2559	0.9615384615384616	-23.5	0	1.162015e-06	0.441	0	0	-6.51454	16	20	8	3UTR	MIRT727422	0	0
hsa-miR-193b-3p	NM_002635	SLC25A3	AACTGGCCCTCAAAGTCCCGCT#GGCTGGGATTAGAGGGCTGAGC#..(((((((((..(((((((((#))).)))))).))))))).)).	4643	4665	0.9615384615384616	-24.5	1	9.125605e-06	0.485	0	0	-9.59293	18	22	7	3UTR		0	0
hsa-miR-193b-3p	NM_002843	PTPRJ	AACTGGCCCTCAAAGTCCCGCT#GCATCCTGAAAAGGGCTGGGGACAGGGCCAGTG#.(((((((((....((((((((#.)))..)))))))))))))).	6913	6946	0.9615384615384616	-28	1	3.019253e-05	0.456	0	0	-12.1109	17	21	14	3UTR		0	0
hsa-miR-193b-3p	NM_003322	TULP1	AACTGGCCCTCAAAGTCCCGCT#GGCGGGCTAGGAGGAGGGGGTAGGTGATGGGGGACGAGGGCCAGG#..(((((((((...(((((.(.#.).)))))))))))))).	2039	2084	0.9615384615384616	-30.9	1	5.125815e-05	0.353	0.47400888888888887	0.5496766487499999	-10.4498	15	18	14	3UTR		0	0
hsa-miR-193b-3p	NM_003413	ZIC3	AACTGGCCCTCAAAGTCCCGCT#AGTGGTGATGAGTAAGGCCAGTTG#((((((((((((...(((((((#))))).))))))...)))))))).	3309	3333	0.9615384615384616	-23.3	1	0.000862843	0.603	4.427747333333333	4.590505875000002	-6.81899	19	24	8	3UTR		0	0
hsa-miR-193b-3p	NM_003761	VAMP8	AACTGGCCCTCAAAGTCCCGCT#AGCATGTGGCTGGGAAACTGTTGGTGGCCAGTG#.(((((((.((((..(((((((#.))).)))).....)))).))))))).	619	652	0.9615384615384616	-25.3	1	0.000556657	0.47	4.372	4.519937431500001	-6.442	18	27	7	3UTR	MIRT016522	0	0
hsa-miR-193b-3p	NM_003854	IL1RL2	AACTGGCCCTCAAAGTCCCGCT#GGAGGGTGAGGGCTGGTC#.(((((((((((....(((.((#)).)))))))))))))).	2050	2068	0.9615384615384616	-23	1	0.00960251	0.353	0	0	-6.90779	16	18	14	3UTR		0	0
hsa-miR-193b-3p	NM_003957	BRSK2	AACTGGCCCTCAAAGTCCCGCT#GCTGGGGCAGGGCCAGG#..((((((((....(((((((.#)).))))))))))))).	3158	3175	0.9615384615384616	-26.8	1	4.074449e-06	0.353	0	0	-13.2745	15	17	13	3UTR		0	0
hsa-miR-193b-3p	NM_004307	APBB2	AACTGGCCCTCAAAGTCCCGCT#GGTGGGGGACAGGGGGACCGGA#..(((((((((....(((((((#)))))))....))))).)))).	4889	4911	0.9615384615384616	-25.2	1	0.000494743	0.471	3.4005808200000005	2.8517580244999996	-11.1852	16	22	7	3UTR		0	0
hsa-miR-193b-3p	NM_207518	PRKACA	AACTGGCCCTCAAAGTCCCGCT#TGGGCTTTGAAAGCCAGA#..(((((..((((((.((((..#))))))))))..))))).	1876	1894	0.9615384615384616	-22.1	0	1.35181e-05	0.441	0	0	-8.56007	15	18	10	3UTR		0	0
hsa-miR-193b-3p	NM_213611	SLC25A3	AACTGGCCCTCAAAGTCCCGCT#GGCTGGGATTAGAGGGCTGAGC#..(((((((((..(((((((((#))).)))))).))))))).)).	4877	4899	0.9615384615384616	-24.5	1	9.125605e-06	0.485	0	0	-9.59293	18	22	7	3UTR		0	0
hsa-miR-193b-3p	XM_006723977	DYRK1A	AACTGGCCCTCAAAGTCCCGCT#GTGGGGATTATGGGGGCTAC#...(((((((((.((((((((.#))))).))).))))))))).	15439	15459	0.9615384615384616	-25.3	0	0.00261946	0.471	0	0	-7.80367	17	20	9	3UTR		1	0
hsa-miR-193b-3p	XM_017008783	CBR4	AACTGGCCCTCAAAGTCCCGCT#GGATCTTGAGCTCCAGA#..((((..(((((.((((....#)))).)))))..)))).	760	777	0.9615384615384616	-17	0	0.00118787	0.603	0	0	-9.67116	13	17	5	3UTR		0	0
hsa-miR-193b-3p	NM_001042519	C2orf88	AACTGGCCCTCAAAGTCCCGCT#AGAGGTACAGAGGGCTGGA#..(((((((((...((.((.((#)).)).)).))))))))).	1526	1545	0.9615384615384616	-19.1	1	0.000131373	0.632	0.42784506666666666	0.33176529374999997	-10.4498	15	19	9	3UTR		0	0
hsa-miR-193b-3p	NM_001042521	C2orf88	AACTGGCCCTCAAAGTCCCGCT#AGAGGTACAGAGGGCTGGA#..(((((((((...((.((.((#)).)).)).))))))))).	1477	1496	0.9615384615384616	-19.1	1	0.000131373	0.632	1.7396666666666667	2.96525	-10.4498	15	19	9	3UTR		0	0
hsa-miR-193b-3p	NM_001122672	KYAT1	AACTGGCCCTCAAAGTCCCGCT#GGTGGGTTTGTAGGGTCTTGTG#.((.((((((((((..((((((#)))))))))).))))))..)).	1417	1439	0.9615384615384616	-21.2	0	0.00521603	0.426	1.1933364545454546	3.91953	-7.79385	18	22	10	3UTR	MIRT041469	0	0
hsa-miR-193b-3p	NM_001123226	MTO1	AACTGGCCCTCAAAGTCCCGCT#AGCACTTTGGGAGGCCAGG#..((((((((((((((...(((#))))))))))).)))))).	6223	6242	0.9615384615384616	-24.3	1	2.536944e-07	0.441	0.08081573333333335	0.04252781874999999	-4.957	17	19	11	3UTR		0	0
hsa-miR-193b-3p	NM_001134456	NXPE3	AACTGGCCCTCAAAGTCCCGCT#AGCACTTTGGGAGGCCAGG#..((((((((((((((...(((#))))))))))).)))))).	3984	4003	0.9615384615384616	-24.3	1	1.808972e-06	0.441	0.018854733333333328	0.10899839124999999	-4.957	17	19	11	3UTR		0	0
hsa-miR-193b-3p	NM_032288	FYTTD1	AACTGGCCCTCAAAGTCCCGCT#GGCGGGCGGATCATGAGGCCAGG#..((((.(((((..(.((((((#)))))))......))))))))).	3700	3723	0.9615384615384616	-23.7	0	0.00227735	0.382	-0.209481	-0.168561	-8.87971	16	23	9	3UTR		0	0
hsa-miR-193b-3p	NM_032303	HSDL2	AACTGGCCCTCAAAGTCCCGCT#GGCTGGGAGGGTTGAGGGGAAGA#..((..(((((((..(((((((#))).))))...)))))))..)).	2518	2541	0.9615384615384616	-21.8	0	0.0528887	0.603	-0.0505043	0.114946	-12.5693	16	23	7	3UTR		0	0
hsa-miR-193b-3p	NM_032999	GTF2I	AACTGGCCCTCAAAGTCCCGCT#GTGGGTCTGGAATGGCTGGTG#.(((((((.....((.(((((.#))))).)).....))))))).	3535	3556	0.9615384615384616	-21.5	1	0.00140487	0.559	2.206092571428571	2.5989643124999997	-13.786	14	21	7	3UTR		0	0
hsa-miR-193b-3p	NM_033000	GTF2I	AACTGGCCCTCAAAGTCCCGCT#GTGGGTCTGGAATGGCTGGTG#.(((((((.....((.(((((.#))))).)).....))))))).	3475	3496	0.9615384615384616	-21.5	1	0.00140487	0.559	2.206092571428571	2.5989643124999997	-13.786	14	21	7	3UTR		0	0
hsa-miR-193b-3p	NM_033001	GTF2I	AACTGGCCCTCAAAGTCCCGCT#GTGGGTCTGGAATGGCTGGTG#.(((((((.....((.(((((.#))))).)).....))))))).	3472	3493	0.9615384615384616	-21.5	1	0.00140487	0.559	2.206092571428571	2.5989643124999997	-13.786	14	21	7	3UTR		0	0
hsa-miR-193b-3p	NM_052876	NACC1	AACTGGCCCTCAAAGTCCCGCT#AGGGGGATTTTAGGAGATGGGGTGGGGGCCAGC#..(((((((((((((((((.((#)).)))))))............)))))))))).	3357	3390	0.9615384615384616	-29.8	1	5.950725e-05	0.412	-0.0474584	-0.135164	-4.957	19	33	10	3UTR		0	0
hsa-miR-193b-3p	NM_133645	MTO1	AACTGGCCCTCAAAGTCCCGCT#AGCACTTTGGGAGGCCAGG#..((((((((((((((...(((#))))))))))).)))))).	6178	6197	0.9615384615384616	-24.3	1	2.536944e-07	0.441	0.08081573333333335	0.04252781874999999	-4.957	17	19	11	3UTR		0	0
hsa-miR-193b-3p	NM_001293640	WASHC4	AACTGGCCCTCAAAGTCCCGCT#GCCTGGACTTGAGGGTA#.....((((((.((((((.((.#))..)))))))))))).	3811	3828	0.9615384615384616	-21.6	0	0.000297365	0.676	0.8076530000000001	0.44528719000000005	-17.0124	14	17	12	3UTR		0	0
hsa-miR-193b-3p	NM_001300803	MAJIN	AACTGGCCCTCAAAGTCCCGCT#TGAGGGCCGGTTT#((((((((((((..........#)))))))))))).	1050	1063	0.9615384615384616	-22.3	1	0.000372012	0.529	-1.45594	-0.316556	-7.05204	12	13	12	3UTR		0	0
hsa-miR-193b-3p	NM_001308197	SSR3	AACTGGCCCTCAAAGTCCCGCT#AGCAGAGGAATTAATAGATTAGGAGGGTCTTTTGGGGGGTTGGTTT#(((((((((((((((.(((.((#.)).))).))))..))))))))))).	4157	4203	0.9615384615384616	-23.4	1	0.000814119	0.588	4.62948505882353	4.852752198749998	-4.17062	20	26	11	3UTR		0	0
hsa-miR-193b-3p	NM_001321202	COA1	AACTGGCCCTCAAAGTCCCGCT#GGATGGGTGCACTTTTGGGTCAGG#..(((((((..(((((((((((#)).))))...))))).))))))).	1242	1266	0.9615384615384616	-20.8	1	0.00077162	0.456	-0.905469	-0.0613116	-9.02428	18	24	7	3UTR		0	0
hsa-miR-193b-3p	NM_001321399	C17orf78	AACTGGCCCTCAAAGTCCCGCT#AGTGGGACTCCTGATCTCCCTGGTTG#((((((...(((.(((((((((#)))))))))..))).....)))))).	1111	1137	0.9615384615384616	-18.5	0	0.0147295	0.588	-0.0448624	0.221058	-10.1404	18	26	9	3UTR		0	0
hsa-miR-193b-3p	NM_001329606	CSNK1G1	AACTGGCCCTCAAAGTCCCGCT#AGGGGGATGGGGCCGGC#..((((((((....(((((.((#)).))))))))))))).	2441	2458	0.9615384615384616	-25.5	1	2.862407e-06	0.471	0.395469	0.4033294091249999	-13.2745	15	17	13	3UTR		0	0
hsa-miR-193b-3p	NM_000286	PEX12	AACTGGCCCTCAAAGTCCCGCT#AGCTGCTTAAAGTAGAAGGATCAGGACTGGCAGGGGATATGAGGGCCAGTG#.(((((((((((...(((((((#.))).))))...))))))))))).	1836	1887	0.9615384615384616	-32.1	1	0.000119575	0.559	5.148098909090909	4.36182	-6.67474	18	24	11	3UTR		0	0
hsa-miR-193b-3p	NM_001008274	TRIM72	AACTGGCCCTCAAAGTCCCGCT#GGAGGGACAGGGCCAGG#..((((((((....(((((.((#)).))))))))))))).	2232	2249	0.9615384615384616	-25.9	1	0.0018176	0.441	0	0	-13.2745	15	17	13	3UTR		0	0
hsa-miR-193b-3p	NM_001011537	FYTTD1	AACTGGCCCTCAAAGTCCCGCT#GGCGGGCGGATCATGAGGCCAGG#..((((.(((((..(.((((((#)))))))......))))))))).	3791	3814	0.9615384615384616	-23.7	0	0.00227735	0.382	0	0	-8.87971	16	23	9	3UTR		0	0
hsa-miR-193b-3p	NM_001018053	PFKFB2	AACTGGCCCTCAAAGTCCCGCT#GGCTAGAACAGGAAGTTAAGTGGGAACTGGACTTTGGGGGCCAC#...(((((((((((((((((((#.)))))))......)))))))))))).	1600	1644	0.9615384615384616	-31	0	1.676161e-05	0.471	0	0	-6.51454	19	27	12	3UTR		0	0
hsa-miR-193b-3p	NM_001033503	SAR1B	AACTGGCCCTCAAAGTCCCGCT#GTGGGATTGGCCT#....((((.....((((((((.#)))))))))))).	1629	1642	0.9615384615384616	-18.7	0	4.095678e-05	0.515	0	0	-19.3062	12	13	12	3UTR		0	0
hsa-miR-193b-3p	NM_001037277	GGPS1	AACTGGCCCTCAAAGTCCCGCT#AGCACTTTGGGAGGCCGAGG#..((((((((((((((...(((#))))))))))).)))).)).	1520	1540	0.9615384615384616	-20.5	1	2.330775e-06	0.368	0.11806693750000005	-0.0420181	-4.957	17	20	11	3UTR		0	0
hsa-miR-193b-3p	NM_001037278	GGPS1	AACTGGCCCTCAAAGTCCCGCT#AGCACTTTGGGAGGCCGAGG#..((((((((((((((...(((#))))))))))).)))).)).	1575	1595	0.9615384615384616	-20.5	1	2.330775e-06	0.368	0	0	-4.957	17	20	11	3UTR		0	0
hsa-miR-193b-3p	NM_001039570	KREMEN1	AACTGGCCCTCAAAGTCCCGCT#GGCAGGACTGCCACCCCAGGCCCCGTGGGAGGCCTGCTGAGGGCACAGA#..((((((((((.((((((((.#.))))))...))..))))))).))).	3765	3814	0.9615384615384616	-27.4	1	9.783043e-07	0.338	0	0	-6.24613	18	26	7	3UTR	MIRT041497	0	0
hsa-miR-193b-3p	NM_001039770	TMPPE	AACTGGCCCTCAAAGTCCCGCT#GGTGGGGCGGGGAGGAGCAGG#..(((..((((...((((((((#))))))))...))))..))).	2251	2272	0.9615384615384616	-25.9	0	0.000623014	0.515	0	0	-13.8944	15	21	8	3UTR	MIRT512632	0	1
hsa-miR-193b-3p	NM_001354564	NDRG2	AACTGGCCCTCAAAGTCCCGCT#AGTGGGACTGGGGAGGGAGCTAAGCTTGGGCTGGG#..(((((((((..(((((((((#)))))))))..))..............))))))).	1813	1848	0.9692307692307692	-25.9	1	4.910949e-06	0.382	3.278433444444445	2.85359	-9.59293	18	35	9	3UTR		0	0
hsa-miR-193b-3p	NM_178422	PAQR7	AACTGGCCCTCAAAGTCCCGCT#AGTGGGGTTGGGGCTGGG#..(((((((.(((..(((((((#))))))))))))))))).	2619	2637	0.9692307692307692	-23.7	1	0.0117287	0.471	0	0	-7.7918	17	18	17	3UTR		0	0
hsa-miR-193b-3p	NM_201537	NDRG2	AACTGGCCCTCAAAGTCCCGCT#AGTGGGACTGGGGAGGGAGCTAAGCTTGGGCTGGG#..(((((((((..(((((((((#)))))))))..))..............))))))).	1860	1895	0.9692307692307692	-25.9	1	4.910949e-06	0.382	3.411724444444444	3.1644298500000003	-9.59293	18	35	9	3UTR		0	0
hsa-miR-193b-3p	NM_201538	NDRG2	AACTGGCCCTCAAAGTCCCGCT#AGTGGGACTGGGGAGGGAGCTAAGCTTGGGCTGGG#..(((((((((..(((((((((#)))))))))..))..............))))))).	1775	1810	0.9692307692307692	-25.9	1	4.910949e-06	0.382	2.755763111111111	3.16612	-9.59293	18	35	9	3UTR		0	0
hsa-miR-193b-3p	NM_201539	NDRG2	AACTGGCCCTCAAAGTCCCGCT#AGTGGGACTGGGGAGGGAGCTAAGCTTGGGCTGGG#..(((((((((..(((((((((#)))))))))..))..............))))))).	1817	1852	0.9692307692307692	-25.9	1	4.910949e-06	0.382	3.278433444444445	2.27216	-9.59293	18	35	9	3UTR		0	0
hsa-miR-193b-3p	NM_201541	NDRG2	AACTGGCCCTCAAAGTCCCGCT#AGTGGGACTGGGGAGGGAGCTAAGCTTGGGCTGGG#..(((((((((..(((((((((#)))))))))..))..............))))))).	1842	1877	0.9692307692307692	-25.9	1	4.910949e-06	0.382	3.3396100000000004	2.6520839374999996	-9.59293	18	35	9	3UTR		0	0
hsa-miR-193b-3p	NM_014583	LMCD1	AACTGGCCCTCAAAGTCCCGCT#GGTGGTAGATCCTTGAGGGTCAGTA#.((((((((((((.((((((((#)))))..)))..)))))))))))).	1388	1413	0.9692307692307692	-27	1	0.000429026	0.618	0.6826317833333334	0.26727203000000005	-4.65016	20	25	12	3UTR	MIRT016355	0	0
hsa-miR-193b-3p	NM_016250	NDRG2	AACTGGCCCTCAAAGTCCCGCT#AGTGGGACTGGGGAGGGAGCTAAGCTTGGGCTGGG#..(((((((((..(((((((((#)))))))))..))..............))))))).	1885	1920	0.9692307692307692	-25.9	1	4.910949e-06	0.382	3.5799930111111116	2.0044100100000004	-9.59293	18	35	9	3UTR		0	0
hsa-miR-193b-3p	NM_001277074	CCDC12	AACTGGCCCTCAAAGTCCCGCT#GGCAGGGATGGGGGCTAGG#..((((((((((...(((((((#))).)))))))))))))).	570	589	0.9692307692307692	-26.8	1	0.0218722	0.412	0	0	-7.83842	17	19	14	3UTR		0	0
hsa-miR-193b-3p	NM_001278233	LMCD1	AACTGGCCCTCAAAGTCCCGCT#GGTGGTAGATCCTTGAGGGTCAGTA#.((((((((((((.((((((((#)))))..)))..)))))))))))).	1299	1324	0.9692307692307692	-27	1	0.000429026	0.618	0.6826317833333334	0.26727203000000005	-4.65016	20	25	12	3UTR	MIRT016355	0	0
hsa-miR-193b-3p	NM_001278234	LMCD1	AACTGGCCCTCAAAGTCCCGCT#GGTGGTAGATCCTTGAGGGTCAGTA#.((((((((((((.((((((((#)))))..)))..)))))))))))).	1132	1157	0.9692307692307692	-27	1	0.000429026	0.618	0.30801161666666665	0.2588433374999999	-4.65016	20	25	12	3UTR	MIRT016355	0	0
hsa-miR-193b-3p	NM_001282211	NDRG2	AACTGGCCCTCAAAGTCCCGCT#AGTGGGACTGGGGAGGGAGCTAAGCTTGGGCTGGG#..(((((((((..(((((((((#)))))))))..))..............))))))).	1787	1822	0.9692307692307692	-25.9	1	4.910949e-06	0.382	3.0999614444444443	2.7736985274999997	-9.59293	18	35	9	3UTR		0	0
hsa-miR-193b-3p	NM_001282215	NDRG2	AACTGGCCCTCAAAGTCCCGCT#AGTGGGACTGGGGAGGGAGCTAAGCTTGGGCTGGG#..(((((((((..(((((((((#)))))))))..))..............))))))).	1827	1862	0.9692307692307692	-25.9	1	4.910949e-06	0.382	3.411724444444444	3.1644298500000003	-9.59293	18	35	9	3UTR		0	0
hsa-miR-193b-3p	NM_001282216	NDRG2	AACTGGCCCTCAAAGTCCCGCT#AGTGGGACTGGGGAGGGAGCTAAGCTTGGGCTGGG#..(((((((((..(((((((((#)))))))))..))..............))))))).	1758	1793	0.9692307692307692	-25.9	1	4.910949e-06	0.382	2.755763111111111	3.1596444674999997	-9.59293	18	35	9	3UTR		0	0
hsa-miR-193b-3p	NM_020993	BCL7A	AACTGGCCCTCAAAGTCCCGCT#GGTGGGGTCATGGGTTTTGTTGTTTTTGGGGGCTAA#...(((((((((((((((((((#)))))))................)))))))))))).	2387	2423	0.9692307692307692	-24.8	0	0.0233999	0.515	0.023310542857142836	1.1153453837499998	-6.51454	19	36	12	3UTR		0	0
hsa-miR-193b-3p	NM_012171	TSPAN17	AACTGGCCCTCAAAGTCCCGCT#GGTGGGATGGGGGTCAGG#..((((((((((...(((((((#))))))))))))))))).	1482	1500	0.9692307692307692	-28.3	1	0.00316506	0.441	-0.4479	0.04417500000000001	-7.83842	17	18	17	3UTR		0	0
hsa-miR-193b-3p	NM_130465	TSPAN17	AACTGGCCCTCAAAGTCCCGCT#GGTGGGATGGGGGTCAGG#..((((((((((...(((((((#))))))))))))))))).	1473	1491	0.9692307692307692	-28.3	1	0.00316506	0.441	-0.4479	0.04417500000000001	-7.83842	17	18	17	3UTR		0	0
hsa-miR-193b-3p	NM_001006616	TSPAN17	AACTGGCCCTCAAAGTCCCGCT#GGTGGGATGGGGGTCAGG#..((((((((((...(((((((#))))))))))))))))).	1441	1459	0.9692307692307692	-28.3	1	0.00316506	0.441	0	0	-7.83842	17	18	17	3UTR		0	0
hsa-miR-193b-3p	NM_001351773	ZNF320	AACTGGCCCTCAAAGTCCCGCT#AGCACTTTGAGAGGCCAA#...(((((((((((((...(((#))))))))))).))))).	1777	1795	0.9743589743589743	-22	0	0.00996281	0.515	0.3007749999999999	-0.118513	-6.51454	16	18	11	3UTR		0	0
hsa-miR-193b-3p	XM_024454106	OCIAD1	AACTGGCCCTCAAAGTCCCGCT#AGCACTTTGGGAGGCCGA#...(((((((((((((...(((#))))))))))).))))).	1485	1503	0.9743589743589743	-20.4	0	3.855434e-07	0.456	0	0	-6.51454	16	18	11	3UTR		0	0
hsa-miR-193b-3p	XM_024454107	OCIAD1	AACTGGCCCTCAAAGTCCCGCT#AGCACTTTGGGAGGCCGA#...(((((((((((((...(((#))))))))))).))))).	1518	1536	0.9743589743589743	-20.4	0	3.855434e-07	0.456	0	0	-6.51454	16	18	11	3UTR		0	0
hsa-miR-193b-3p	XM_024454108	OCIAD1	AACTGGCCCTCAAAGTCCCGCT#AGCACTTTGGGAGGCCGA#...(((((((((((((...(((#))))))))))).))))).	1547	1565	0.9743589743589743	-20.4	0	3.855434e-07	0.456	0	0	-6.51454	16	18	11	3UTR		0	0
hsa-miR-193b-3p	XM_047417799	ATG10	AACTGGCCCTCAAAGTCCCGCT#GCTGTACTCTTTGAGGGCTC#....(((((((((((..(.((.#)).)....))))))))))).	1925	1945	0.9743589743589743	-20	0	2.564658e-05	0.471	0	0	-9.77961	14	20	11	3UTR		0	0
hsa-miR-193b-3p	XM_047433396	SLC12A6	AACTGGCCCTCAAAGTCCCGCT#GTGGCTCACACCTGTAATCCCAGCACTTTGGGAGGCCAA#...(((((((((((((...(((#.))))))))))).))))).	4659	4698	0.9743589743589743	-21.4	0	2.953523e-06	0.456	0	0	-6.51454	16	19	11	3UTR		0	0
hsa-miR-193b-3p	NM_173557	RNF152	AACTGGCCCTCAAAGTCCCGCT#TGGGATGTAGGGCTAGTA#.(((((((((....((((((..#))))))..))))))))).	7229	7247	0.9743589743589743	-24.1	1	7.457197e-05	0.574	0	0	-12.1109	15	18	9	3UTR		0	0
hsa-miR-193b-3p	NM_001382289	FSHB	AACTGGCCCTCAAAGTCCCGCT#TGAGAGTGCTGGGGGCCAGG#..((((((((((.(.((.((..#)).)).)..)))))))))).	619	639	0.9743589743589743	-22.3	1	3.830157e-07	0.485	0	0	-6.98158	15	20	10	3UTR		0	0
hsa-miR-193b-3p	NM_001385284	KIT	AACTGGCCCTCAAAGTCCCGCT#AGAGGGAGGTATGGACTGGGGGCCAGA#..(((((((((..(((((.(((#.)))..)))))))))))))).	3251	3278	0.9743589743589743	-26.2	1	0.000205172	0.485	0.7896611555555555	0.21736473499999998	-9.59293	17	21	14	3UTR	MIRT734593	1	1
hsa-miR-193b-3p	NM_001385286	KIT	AACTGGCCCTCAAAGTCCCGCT#AGAGGGAGGTATGGACTGGGGGCCAGA#..(((((((((..(((((.(((#.)))..)))))))))))))).	3233	3260	0.9743589743589743	-26.2	1	0.000205172	0.485	0.3464384888888889	0.14751658000000004	-9.59293	17	21	14	3UTR	MIRT734593	1	1
hsa-miR-193b-3p	NM_001385290	KIT	AACTGGCCCTCAAAGTCCCGCT#AGAGGGAGGTATGGACTGGGGGCCAGA#..(((((((((..(((((.(((#.)))..)))))))))))))).	3248	3275	0.9743589743589743	-26.2	1	0.000205172	0.485	0.14918897777777776	0.16537154624999997	-9.59293	17	21	14	3UTR	MIRT734593	1	1
hsa-miR-193b-3p	NM_001385292	KIT	AACTGGCCCTCAAAGTCCCGCT#AGAGGGAGGTATGGACTGGGGGCCAGA#..(((((((((..(((((.(((#.)))..)))))))))))))).	3236	3263	0.9743589743589743	-26.2	1	0.000205172	0.485	0.3464384888888889	0.14751658000000004	-9.59293	17	21	14	3UTR	MIRT734593	1	1
hsa-miR-193b-3p	NM_001387571	ZNF320	AACTGGCCCTCAAAGTCCCGCT#AGCACTTTGGGAGGCCAA#...(((((((((((((...(((#))))))))))).))))).	3099	3117	0.9743589743589743	-21.1	0	2.327616e-05	0.456	0	0	-6.51454	16	18	11	3UTR		0	0
hsa-miR-193b-3p	NM_001394009	CCDC181	AACTGGCCCTCAAAGTCCCGCT#GACTTTGATGGAACAGA#..(((..((((((((((.....#)))))))).))..))).	1632	1649	0.9743589743589743	-17.4	0	0.00173228	0.705	0	0	-8.40165	13	17	8	3UTR		0	0
hsa-miR-193b-3p	NM_017688	BSPRY	AACTGGCCCTCAAAGTCCCGCT#AGCTGAGGGAGTTAAGAGGGCCAA#...((((((((.((.(((((((#)))...)))).))..)))))))).	2265	2289	0.9743589743589743	-25.7	0	0.0149056	0.515	0.454774	0.3329572000645161	-10.5968	17	24	8	3UTR		0	0
hsa-miR-193b-3p	NM_001197104	KMT2A	AACTGGCCCTCAAAGTCCCGCT#AGCGGGTCATTGCAAAGGGCTGGG#..(((((((((((.(.((((((#)))))).).)))...)))))))).	15579	15603	0.9743589743589743	-26.2	1	0.00547155	0.647	4.542204999999999	2.1561803362500003	-6.04689	18	24	8	3UTR		1	1
hsa-miR-193b-3p	NM_001256674	STOML1	AACTGGCCCTCAAAGTCCCGCT#GCGGGCATTTGAGGGGCAGG#..(((.((((((((..(((((.#)))))..)))))))).))).	3498	3518	0.9743589743589743	-31.3	0	0.00717393	0.515	0.0591742	-0.35551	-7.82646	16	20	8	3UTR		0	0
hsa-miR-193b-3p	NM_020459	PAIP2B	AACTGGCCCTCAAAGTCCCGCT#AGCATGGACACTGAGGGCTGGC#..((((((((((..((((.(((#)))..))))..)))))))))).	2615	2637	0.9743589743589743	-26.3	1	3.913252e-08	0.544	0.057056510000000026	0.0814406	-7.10297	17	22	10	3UTR		0	0
hsa-miR-193b-3p	NM_021116	ADCY1	AACTGGCCCTCAAAGTCCCGCT#TGGAGACTTTGAGGGCAGA#..((.(((((((((((((((..#))).)))))))))))))).	5563	5582	0.9743589743589743	-26.7	0	9.112556e-05	0.397	0.11488690624999998	-0.116247	-9.07604	17	19	14	3UTR		0	0
hsa-miR-193b-3p	NM_024960	PANK2	AACTGGCCCTCAAAGTCCCGCT#AGTGAGGAAACCCGAGGGCCAA#...((((((((....(((((((#)))).))).....)))))))).	5469	5491	0.9743589743589743	-24.1	0	0.00150781	0.5	0.14785578749999997	1.12927	-12.7428	15	22	8	3UTR		0	0
hsa-miR-193b-3p	NM_001142961	LPAR5	AACTGGCCCTCAAAGTCCCGCT#CGTGGACTTCCTCAGAGGGTTGGTC#.((((((((((.((((((((..#)).)))))).....)))))))))).	2530	2555	0.9743589743589743	-22.3	1	1.437129e-07	0.515	0.12820089000000004	-0.0907206	-7.14013	18	25	10	3UTR		0	0
hsa-miR-193b-3p	NM_004809	STOML1	AACTGGCCCTCAAAGTCCCGCT#GCGGGCATTTGAGGGGCAGG#..(((.((((((((..(((((.#)))))..)))))))).))).	3651	3671	0.9743589743589743	-31.3	0	0.00717393	0.515	0.08705158750000001	-0.388964	-7.82646	16	20	8	3UTR		0	0
hsa-miR-193b-3p	NM_005658	TRAF1	AACTGGCCCTCAAAGTCCCGCT#GGCGGGGCTCCTGAGGGAGCTCCAACTCAGAAGGGAGCTAGCCAGA#..((((((((((.(((((((((#)))))))))..)))))........................))))).	1728	1774	0.9743589743589743	-28.4	1	0.0094333	0.382	-0.319072	0.007148222499999996	-6.24613	19	46	9	3UTR		0	0
hsa-miR-193b-3p	NM_005933	KMT2A	AACTGGCCCTCAAAGTCCCGCT#AGCGGGTCATTGCAAAGGGCTGGG#..(((((((((((.(.((((((#)))))).).)))...)))))))).	15570	15594	0.9743589743589743	-26.2	1	0.00547155	0.647	4.542204999999999	2.1561803362500003	-6.04689	18	24	8	3UTR		1	1
hsa-miR-193b-3p	NM_001537	HSBP1	AACTGGCCCTCAAAGTCCCGCT#TGGGACGGGGGCTGGA#..(((((((((...((((((..#))))))))))))))).	8147	8163	0.9743589743589743	-23.9	1	6.079427e-05	0.618	0	0	-10.4498	15	16	15	3UTR		0	1
hsa-miR-193b-3p	NM_003044	SLC6A12	AACTGGCCCTCAAAGTCCCGCT#AGTTCACATGGGGACCCCCTTCTTGGGGGCCAGA#..(((((((((((.(((((...#.))))).......))))))))))).	3624	3658	0.9743589743589743	-27.9	1	2.355887e-09	0.515	0.027262690909090906	-0.297051	-5.81384	16	25	11	3UTR		0	0
hsa-miR-193b-3p	NM_003722	TP63	AACTGGCCCTCAAAGTCCCGCT#GGTACTTTCTGTTATGGGCTTTTGGGGAGCCAGA#..(((((((((((((.((((..#.)))).)))))))).))))).	4834	4868	0.9743589743589743	-25.7	1	6.980907e-08	0.559	0	0	-5.19005	17	21	8	3UTR		0	0
hsa-miR-193b-3p	XM_005268908	NFYB	AACTGGCCCTCAAAGTCCCGCT#AGCACTTTGGGAGGCCAA#...(((((((((((((...(((#))))))))))).))))).	2919	2937	0.9743589743589743	-21.1	0	3.060184e-05	0.485	0	0	-6.51454	16	18	11	3UTR		0	0
hsa-miR-193b-3p	XM_017007425	USP13	AACTGGCCCTCAAAGTCCCGCT#CTCTATTTTGCTTTGGGGGTCAGTG#.(((((((((((((((......#.))))))))))))))).	2837	2862	0.9743589743589743	-25.6	1	2.140424e-06	0.5	0	0	-3.79332	15	17	15	3UTR		0	1
hsa-miR-193b-3p	XM_017007427	USP13	AACTGGCCCTCAAAGTCCCGCT#CTCTATTTTGCTTTGGGGGTCAGTG#.(((((((((((((((......#.))))))))))))))).	2523	2548	0.9743589743589743	-25.6	1	2.140424e-06	0.5	0	0	-3.79332	15	17	15	3UTR		0	1
hsa-miR-193b-3p	NM_001043229	CSKMT	AACTGGCCCTCAAAGTCCCGCT#AGCACTTTGGGAGGCCAA#...(((((((((((((...(((#))))))))))).))))).	1766	1784	0.9743589743589743	-21.1	0	6.658318e-05	0.471	0.03174085714285712	-0.482805	-6.51454	16	18	11	3UTR		0	0
hsa-miR-193b-3p	NM_001114978	TP63	AACTGGCCCTCAAAGTCCCGCT#GGTACTTTCTGTTATGGGCTTTTGGGGAGCCAGA#..(((((((((((((.((((..#.)))).)))))))).))))).	4740	4774	0.9743589743589743	-25.7	1	6.980907e-08	0.559	0.7858031357142856	1.40826	-5.19005	17	21	8	3UTR		0	0
hsa-miR-193b-3p	NM_001114980	TP63	AACTGGCCCTCAAAGTCCCGCT#GGTACTTTCTGTTATGGGCTTTTGGGGAGCCAGA#..(((((((((((((.((((..#.)))).)))))))).))))).	4567	4601	0.9743589743589743	-25.7	1	6.980907e-08	0.559	0.7858031357142856	1.40826	-5.19005	17	21	8	3UTR		0	0
hsa-miR-193b-3p	NM_001114981	TP63	AACTGGCCCTCAAAGTCCCGCT#GGTACTTTCTGTTATGGGCTTTTGGGGAGCCAGA#..(((((((((((((.((((..#.)))).)))))))).))))).	4473	4507	0.9743589743589743	-25.7	1	6.980907e-08	0.559	0.7858031357142856	1.40826	-5.19005	17	21	8	3UTR		0	0
hsa-miR-193b-3p	NM_001122848	SLC6A12	AACTGGCCCTCAAAGTCCCGCT#AGTTCACATGGGGACCCCCTTCTTGGGGGCCAGA#..(((((((((((.(((((...#.))))).......))))))))))).	3083	3117	0.9743589743589743	-27.9	1	2.355887e-09	0.515	0	0	-5.81384	16	25	11	3UTR		0	0
hsa-miR-193b-3p	NM_001129883	PATE3	AACTGGCCCTCAAAGTCCCGCT#AGCTTTCTTGAGACTTGGGGGCCTGGG#..(((((((((.(((((.((..#.)).)))))))))))).)).	1233	1260	0.9743589743589743	-21.3	1	1.955302e-05	0.471	0.014641280000000024	-0.286701	-8.3038	16	20	12	3UTR		0	0
hsa-miR-193b-3p	NM_001308424	ZNF473	AACTGGCCCTCAAAGTCCCGCT#AGCCATTGGGTGTGGGGGCAGTC#.(((.(((((((....((((..#.))))..)))))))))).	4323	4346	0.9743589743589743	-20.1	0	0.000113691	0.471	-0.180024	-0.289781	-11.0268	14	18	10	3UTR		0	0
hsa-miR-193b-3p	NM_001318824	GATD1	AACTGGCCCTCAAAGTCCCGCT#GGTGGGTTTTGGGGGGACGTGCTCAGG#..(((((((((((((.((((((#))))))))))))))).......)))).	3829	3856	0.9743589743589743	-23.6	1	8.175247e-05	0.412	3.1111185200000007	3.1706823487499993	-5.19005	19	27	15	3UTR		0	0
hsa-miR-193b-3p	NM_001329144	TP63	AACTGGCCCTCAAAGTCCCGCT#GGTACTTTCTGTTATGGGCTTTTGGGGAGCCAGA#..(((((((((((((.((((..#.)))).)))))))).))))).	4595	4629	0.9743589743589743	-25.7	1	6.980907e-08	0.559	0.7858031357142856	1.40826	-5.19005	17	21	8	3UTR		0	0
hsa-miR-193b-3p	NM_001329145	TP63	AACTGGCCCTCAAAGTCCCGCT#GGTACTTTCTGTTATGGGCTTTTGGGGAGCCAGA#..(((((((((((((.((((..#.)))).)))))))).))))).	4328	4362	0.9743589743589743	-25.7	1	6.980907e-08	0.559	0.7858031357142856	1.40826	-5.19005	17	21	8	3UTR		0	0
hsa-miR-193b-3p	NM_001329146	TP63	AACTGGCCCTCAAAGTCCCGCT#GGTACTTTCTGTTATGGGCTTTTGGGGAGCCAGA#..(((((((((((((.((((..#.)))).)))))))).))))).	4312	4346	0.9743589743589743	-25.7	1	6.980907e-08	0.559	0.7858031357142856	1.40826	-5.19005	17	21	8	3UTR		0	0
hsa-miR-193b-3p	NM_001329148	TP63	AACTGGCCCTCAAAGTCCCGCT#GGTACTTTCTGTTATGGGCTTTTGGGGAGCCAGA#..(((((((((((((.((((..#.)))).)))))))).))))).	4822	4856	0.9743589743589743	-25.7	1	6.980907e-08	0.559	0.7858031357142856	1.40826	-5.19005	17	21	8	3UTR		0	0
hsa-miR-193b-3p	NM_000348	SRD5A2	AACTGGCCCTCAAAGTCCCGCT#AGCCATCTCATTTTGTCCCTTTGAGGGTCAGA#..(((((((((((((.......#.))))))))))))).	3555	3587	0.9743589743589743	-23.3	1	7.711064e-06	0.515	0	0	-5.19005	13	15	13	3UTR		0	0
hsa-miR-193b-3p	NM_000510	FSHB	AACTGGCCCTCAAAGTCCCGCT#TGAGAGTGCTGGGGGCCAGG#..((((((((((.(.((.((..#)).)).)..)))))))))).	618	638	0.9743589743589743	-22.3	1	3.830157e-07	0.485	0	0	-6.98158	15	20	10	3UTR		0	0
hsa-miR-193b-3p	NM_001001414	NCCRP1	AACTGGCCCTCAAAGTCCCGCT#GGATGCTGAGGGCTGGTC#.(((((((((((..((((....#))))..))))))))))).	1126	1144	0.9743589743589743	-25.4	1	7.78391e-06	0.5	0	0	-5.9393	15	18	11	3UTR		0	0
hsa-miR-193b-3p	NM_001006656	ZNF473	AACTGGCCCTCAAAGTCCCGCT#AGCCATTGGGTGTGGGGGCAGTC#.(((.(((((((....((((..#.))))..)))))))))).	4401	4424	0.9743589743589743	-20.1	0	0.000113691	0.471	0	0	-11.0268	14	18	10	3UTR		0	0
hsa-miR-193b-3p	NM_001018080	FSHB	AACTGGCCCTCAAAGTCCCGCT#TGAGAGTGCTGGGGGCCAGG#..((((((((((.(.((.((..#)).)).)..)))))))))).	588	608	0.9743589743589743	-22.3	1	3.830157e-07	0.485	0	0	-6.98158	15	20	10	3UTR		0	0
hsa-miR-193b-3p	NM_001034025	ERP29	AACTGGCCCTCAAAGTCCCGCT#AGCTACCCAGTCTTCTACCTCTTCCGGGATGGGGACTTTGAGAACCCAGTCCCATACACTGGGGCAGTTA#(((((.(((((((((((((...#.))))))))))...................))).))))).	240	310	0.9743589743589743	-27.4	0	0.000871316	0.426	0	0	-5.83853	18	40	10	3UTR		0	0
hsa-miR-193b-3p	NM_001042497	SLC12A6	AACTGGCCCTCAAAGTCCCGCT#GTGGCTCACACCTGTAATCCCAGCACTTTGGGAGGCCAA#...(((((((((((((...(((#.))))))))))).))))).	5108	5147	0.9743589743589743	-21.4	0	2.953523e-06	0.456	0	0	-6.51454	16	19	11	3UTR		0	0
hsa-miR-193b-3p	NM_001363771	GGA1	AACTGGCCCTCAAAGTCCCGCT#GGCCCCCTGAGGGACTGTGGGGGCTCAAGGGTA#.(((((((((((.((((((.(.#.).)))))).))))))))....))).	2619	2652	0.9743589743589745	-26.6	1	6.336499e-06	0.309	0	0	-5.08246	18	26	8	3UTR		0	0
hsa-miR-193b-3p	NM_182663	RASSF5	AACTGGCCCTCAAAGTCCCGCT#AGCGGGGGAGAGAGGGTGAGA#..((.((((((....(((((((#)))))))....)))))).)).	3676	3697	0.9743589743589745	-26.9	0	0.00118703	0.441	0	0	-15.3043	15	21	7	3UTR	MIRT041417	0	0
hsa-miR-193b-3p	NM_001378191	ROBO2	AACTGGCCCTCAAAGTCCCGCT#GGGATTTTGTGGCCGT#...(((((..(((((((((...#))))))))).))))).	8580	8596	0.9743589743589745	-22.7	0	0.0131188	0.662	0	0	-8.81344	14	16	9	3UTR		0	0
hsa-miR-193b-3p	NM_001378193	ROBO2	AACTGGCCCTCAAAGTCCCGCT#GGGATTTTGTGGCCGT#...(((((..(((((((((...#))))))))).))))).	8782	8798	0.9743589743589745	-22.7	0	0.0131188	0.662	0	0	-8.81344	14	16	9	3UTR		0	0
hsa-miR-193b-3p	NM_001378196	ROBO2	AACTGGCCCTCAAAGTCCCGCT#GGGATTTTGTGGCCGT#...(((((..(((((((((...#))))))))).))))).	8298	8314	0.9743589743589745	-22.7	0	0.0131188	0.662	0	0	-8.81344	14	16	9	3UTR		0	0
hsa-miR-193b-3p	NM_001378197	ROBO2	AACTGGCCCTCAAAGTCCCGCT#GGGATTTTGTGGCCGT#...(((((..(((((((((...#))))))))).))))).	8635	8651	0.9743589743589745	-22.7	0	0.0131188	0.662	0	0	-8.81344	14	16	9	3UTR		0	0
hsa-miR-193b-3p	NM_001378199	ROBO2	AACTGGCCCTCAAAGTCCCGCT#GGGATTTTGTGGCCGT#...(((((..(((((((((...#))))))))).))))).	8302	8318	0.9743589743589745	-22.7	0	0.0131188	0.662	0	0	-8.81344	14	16	9	3UTR		0	0
hsa-miR-193b-3p	NM_001386771	DTNA	AACTGGCCCTCAAAGTCCCGCT#AGCACCAGAGCCTTTCGGCTCCGGGAGACGAGAGGGTCAT#...((((((((....(((((..#.))))).....)))))))).	2529	2569	0.9743589743589745	-22.8	0	0.000288982	0.544	0	0	-12.7428	13	20	8	3UTR		0	0
hsa-miR-193b-3p	NM_001394353	SPRY3	AACTGGCCCTCAAAGTCCCGCT#GGTGATATATGGGTATGAGGTTTGAACACTGAGGACTGACAGGGCCAGC#..((((((((...(((((((..#.)).)))))...)))))))).	1623	1672	0.9743589743589745	-25.3	1	0.0019387	0.441	0	0	-12.4177	15	21	8	3UTR		0	0
hsa-miR-193b-3p	NM_001395656	ROBO2	AACTGGCCCTCAAAGTCCCGCT#GGGATTTTGTGGCCGT#...(((((..(((((((((...#))))))))).))))).	8794	8810	0.9743589743589745	-22.7	0	0.0131188	0.662	0	0	-8.81344	14	16	9	3UTR		0	0
hsa-miR-193b-3p	NM_014663	KDM4A	AACTGGCCCTCAAAGTCCCGCT#GGTGGGACTAGAGGGCA#.....((((((..(((((((((#))))))))).)))))).	4260	4277	0.9743589743589745	-27.6	0	0.0254705	0.471	1.4189718888888894	1.38431	-18.3015	15	17	9	3UTR		0	0
hsa-miR-193b-3p	NM_001198941	DTNA	AACTGGCCCTCAAAGTCCCGCT#AGCACCAGAGCCTTTCGGCTCCGGGAGACGAGAGGGTCAT#...((((((((....(((((..#.))))).....)))))))).	2349	2389	0.9743589743589745	-22.8	0	0.000288982	0.544	0.34119251250000004	0.011683396250000047	-12.7428	13	20	8	3UTR		0	0
hsa-miR-193b-3p	NM_001198945	DTNA	AACTGGCCCTCAAAGTCCCGCT#AGCACCAGAGCCTTTCGGCTCCGGGAGACGAGAGGGTCAT#...((((((((....(((((..#.))))).....)))))))).	1959	1999	0.9743589743589745	-22.8	0	0.000288982	0.544	0.34119251250000004	0.011683396250000047	-12.7428	13	20	8	3UTR		0	0
hsa-miR-193b-3p	NM_001277285	IGSF9B	AACTGGCCCTCAAAGTCCCGCT#GGCGGGGTCTGTGCCCTCCTTTGAGGTGCTTAGTC#.(((((((((((((((((((((#)))))))...........)))))))).))).))).	7944	7979	0.9743589743589745	-26.4	1	0.0019755	0.382	-0.0840247	0.15818251499999997	-3.79332	21	35	8	3UTR		0	0
hsa-miR-193b-3p	NM_001286517	SLC35B2	AACTGGCCCTCAAAGTCCCGCT#GGTTTTGGGGAGTTTGGGGTCAA#...((((((.((((.((((...#.)))).)))))))))).	1461	1484	0.9743589743589745	-23.8	0	0.00769501	0.5	0	0	-8.4925	14	17	10	3UTR		0	0
hsa-miR-193b-3p	NM_001286519	SLC35B2	AACTGGCCCTCAAAGTCCCGCT#GGTTTTGGGGAGTTTGGGGTCAA#...((((((.((((.((((...#.)))).)))))))))).	1306	1329	0.9743589743589745	-23.8	0	0.00769501	0.5	0	0	-8.4925	14	17	10	3UTR		0	0
hsa-miR-193b-3p	NM_001290040	ROBO2	AACTGGCCCTCAAAGTCCCGCT#GGGATTTTGTGGCCGT#...(((((..(((((((((...#))))))))).))))).	8704	8720	0.9743589743589745	-22.7	0	0.0131188	0.662	0	0	-8.81344	14	16	9	3UTR		0	0
hsa-miR-193b-3p	NM_002942	ROBO2	AACTGGCCCTCAAAGTCCCGCT#GGGATTTTGTGGCCGT#...(((((..(((((((((...#))))))))).))))).	8509	8525	0.9743589743589745	-22.7	0	0.0131188	0.662	0	0	-8.81344	14	16	9	3UTR		0	0
hsa-miR-193b-3p	NM_001128929	ROBO2	AACTGGCCCTCAAAGTCCCGCT#GGGATTTTGTGGCCGT#...(((((..(((((((((...#))))))))).))))).	8169	8185	0.9743589743589745	-22.7	0	0.0131188	0.662	0	0	-8.81344	14	16	9	3UTR		0	0
hsa-miR-193b-3p	NM_032978	DTNA	AACTGGCCCTCAAAGTCCCGCT#AGCACCAGAGCCTTTCGGCTCCGGGAGACGAGAGGGTCAT#...((((((((....(((((..#.))))).....)))))))).	2520	2560	0.9743589743589745	-22.8	0	0.000288982	0.544	0.34119251250000004	0.011683396250000047	-12.7428	13	20	8	3UTR		0	0
hsa-miR-193b-3p	NM_032979	DTNA	AACTGGCCCTCAAAGTCCCGCT#AGCACCAGAGCCTTTCGGCTCCGGGAGACGAGAGGGTCAT#...((((((((....(((((..#.))))).....)))))))).	2538	2578	0.9743589743589745	-22.8	0	0.000288982	0.544	0.34119251250000004	0.011683396250000047	-12.7428	13	20	8	3UTR		0	0
hsa-miR-193b-3p	NM_032981	DTNA	AACTGGCCCTCAAAGTCCCGCT#AGCACCAGAGCCTTTCGGCTCCGGGAGACGAGAGGGTCAT#...((((((((....(((((..#.))))).....)))))))).	1591	1631	0.9743589743589745	-22.8	0	0.000288982	0.544	0.34119251250000004	0.011683396250000047	-12.7428	13	20	8	3UTR		0	0
hsa-miR-193b-3p	NM_001304990	SPRY3	AACTGGCCCTCAAAGTCCCGCT#GGTGATATATGGGTATGAGGTTTGAACACTGAGGACTGACAGGGCCAGC#..((((((((...(((((((..#.)).)))))...)))))))).	1464	1513	0.9743589743589745	-25.3	1	0.0019387	0.441	0	0	-12.4177	15	21	8	3UTR		0	0
hsa-miR-193b-3p	NM_001001560	GGA1	AACTGGCCCTCAAAGTCCCGCT#GGCCCCCTGAGGGACTGTGGGGGCTCAAGGGTA#.(((((((((((.((((((.(.#.).)))))).))))))))....))).	2307	2340	0.9743589743589745	-26.6	1	6.336499e-06	0.309	0	0	-5.08246	18	26	8	3UTR		0	0
hsa-miR-193b-3p	NM_198955	MGAT5B	AACTGGCCCTCAAAGTCCCGCT#AGAGGGGCAGGGGGCTGGG#..(((((((((...(((((.((#)).))))).))))))))).	3083	3102	0.978021978021978	-25	1	0.00149514	0.397	-0.110043	-0.248358	-10.4498	16	19	9	3UTR		0	0
hsa-miR-193b-3p	NM_004983	KCNJ9	AACTGGCCCTCAAAGTCCCGCT#GTGGCAGACCGGGGGCCAGA#..(((((((((...(((((((.#))))..))).))))))))).	1476	1496	0.978021978021978	-26	1	0.00235802	0.397	0.2189352888888889	0.9441083500000003	-10.4498	16	20	9	3UTR		0	0
hsa-miR-193b-3p	NM_001365874	CNR1	AACTGGCCCTCAAAGTCCCGCT#GGGACAATGGGGCTG#....(((((.((..(((((...#)))))..))))))).	4033	4048	0.9807692307692307	-20.8	0	0.281882	0.676	0	0	-12.935	12	15	7	3UTR		0	0
hsa-miR-193b-3p	XM_047418084	GNG4	AACTGGCCCTCAAAGTCCCGCT#AGCAGAAAAACTGGGATTTGAGGGCAGGCAGC#..(((((((((.((((((((..#.))))))))))))))...))).	2032	2064	0.9807692307692307	-24.3	1	0.000847715	0.412	0	0	-8.3038	17	22	14	3UTR		0	0
hsa-miR-193b-3p	XM_047418831	HDGF	AACTGGCCCTCAAAGTCCCGCT#GCGGGGTGGGGGCAGCACAGG#..((((((((((...((((((.#)))))))))))))....))).	1536	1557	0.9807692307692307	-24.7	1	0.000284124	0.324	0	0	-7.83842	16	21	13	3UTR	MIRT041514	0	0
hsa-miR-193b-3p	XM_047431601	PSEN1	AACTGGCCCTCAAAGTCCCGCT#GCTGGGGTGAGGGTTTCAGTG#.(((((((((((...((((((.#)).)))))))))))..)))).	5765	5786	0.9807692307692307	-22.4	1	0.00126728	0.485	0	0	-6.67474	17	21	11	3UTR		1	0
hsa-miR-193b-3p	XM_047431602	PSEN1	AACTGGCCCTCAAAGTCCCGCT#GCTGGGGTGAGGGTTTCAGTG#.(((((((((((...((((((.#)).)))))))))))..)))).	5756	5777	0.9807692307692307	-22.4	1	0.00126728	0.485	0	0	-6.67474	17	21	11	3UTR		1	0
hsa-miR-193b-3p	NM_152485	C1orf74	AACTGGCCCTCAAAGTCCCGCT#AGTGGGACAGGATGGCCAGTTG#((((((((.((...((((((((#))))))))..)).)))))))).	2317	2339	0.9807692307692307	-29.2	1	0.00159587	0.544	0.322652	-0.00542482	-10.4867	18	22	8	3UTR		0	0
hsa-miR-193b-3p	NM_177441	TMUB2	AACTGGCCCTCAAAGTCCCGCT#GGCCCTAGGCTCTTGCTTCTGGGGCTATTGGAGGGTCAGTG#.((((((((((..(((((((..#.)))))))....)))))))))).	2348	2389	0.9807692307692307	-29.2	1	0.000878987	0.515	0	0	-8.42926	17	23	10	3UTR		0	0
hsa-miR-193b-3p	NM_199004	ARRB2	AACTGGCCCTCAAAGTCCCGCT#GGTTGGGAGAGGTGAGGGCAGG#..((.(((((((...(((((((#))).))))....))))))))).	1305	1327	0.9807692307692307	-22.9	0	0.0714662	0.441	2.8874526250000003	1.53551	-11.9575	16	22	9	3UTR		0	0
hsa-miR-193b-3p	NM_001395325	PDE4DIP	AACTGGCCCTCAAAGTCCCGCT#GGCTTAACCATCAGATTAGAAAAGAGGGAAGCAGAGGGCCAGG#..(((((((((....((((.((#.)).))))....))))))))).	5550	5593	0.9807692307692307	-28.3	1	0.00276621	0.471	0	0	-11.1852	15	22	9	3UTR		0	0
hsa-miR-193b-3p	NM_001395326	PDE4DIP	AACTGGCCCTCAAAGTCCCGCT#GCTAAGGGCTTAACCATCAGATTAGAAAAGAGGGAAGCAGAGGGCCAGG#..(((((((((....((((.((#.)).))))....))))))))).	5526	5575	0.9807692307692307	-28.3	1	0.00276621	0.471	0	0	-11.1852	15	22	9	3UTR		0	0
hsa-miR-193b-3p	NM_014324	AMACR	AACTGGCCCTCAAAGTCCCGCT#GGTGGGGCAGGAGGATCACTTGAGCCCAGGAATTTGAGGCCACAGTG#.(((((.(((((((((((((((#))))))))........................))))))).).)))).	3135	3182	0.9807692307692307	-23.4	0	0.00404793	0.485	2.6827807348717942	3.79097	-5.33701	20	47	8	3UTR	MIRT041573	0	0
hsa-miR-193b-3p	NM_017790	RGS3	AACTGGCCCTCAAAGTCCCGCT#GCCCTGGAAACTGACTTCGCATGCTTTCCATGGGGCTTCCGAGGGCCAGG#..(((((((((.((((((((..#.))))))))..))))))))).	3303	3353	0.9807692307692307	-31.6	1	6.483619e-05	0.353	0	0	-8.3038	17	21	9	3UTR		0	0
hsa-miR-193b-3p	NM_018195	NKAPD1	AACTGGCCCTCAAAGTCCCGCT#TGGGATTAGTGGGGGTCT#....((((((((.(((((((..#)))))))..)))))))).	3037	3055	0.9807692307692307	-22.1	0	0.00215895	0.647	0.0569582	0.8389350812499998	-10.8357	15	18	8	3UTR		0	0
hsa-miR-193b-3p	NM_001193536	DOCK8	AACTGGCCCTCAAAGTCCCGCT#GGCGGGATGGAGGATGGGTACTCAGG#..(((((((((...((((((((#))))))))....)).))))...))).	6400	6426	0.9807692307692307	-24	1	0.00381682	0.5	-0.227624	0.2586216913749997	-10.4498	17	26	8	3UTR		0	0
hsa-miR-193b-3p	NM_020127	TUFT1	AACTGGCCCTCAAAGTCCCGCT#TGAGGCTTTGGGGTCAGA#..(((((((.(((((((.((..#)).)))))))))))))).	2292	2310	0.9807692307692307	-22.4	1	6.016438e-05	0.529	-0.41769	-0.191044	-6.19951	16	18	14	3UTR		0	0
hsa-miR-193b-3p	NM_022119	PRSS22	AACTGGCCCTCAAAGTCCCGCT#AGCGGGACGCGGGGCTCGGATCTGAAAGGCGGCCAGA#..(((((((((...((((((((#))))))))...)))................)))))).	1025	1062	0.9807692307692307	-27.8	1	2.16061e-05	0.324	1.43953	0.6121574474999999	-10.4498	17	37	8	3UTR		0	0
hsa-miR-193b-3p	NM_024015	HOXB4	AACTGGCCCTCAAAGTCCCGCT#GGCAGGGTGAGGGGCCAGTTG#((((((((((((....((((((#))).))))))))).)))))).	1616	1637	0.9807692307692307	-25.6	1	0.000566577	0.382	2.861822538461538	2.5072916749999994	-7.05204	18	21	9	3UTR		0	0
hsa-miR-193b-3p	NM_025240	CD276	AACTGGCCCTCAAAGTCCCGCT#AGCCTGGGGCAGGGCAGGGCCAGG#..(((((((((...((((((((#)))..)))))...).)))))))).	2354	2378	0.9807692307692307	-27.3	1	8.203405e-06	0.338	0.24924243399999996	0.030772209999999987	-10.4498	17	24	8	3UTR		0	0
hsa-miR-193b-3p	NM_007318	PSEN1	AACTGGCCCTCAAAGTCCCGCT#GCTGGGGTGAGGGTTTCAGTG#.(((((((((((...((((((.#)).)))))))))))..)))).	5801	5822	0.9807692307692307	-22.4	1	0.00126728	0.485	-0.227099	0.17616709625000013	-6.67474	17	21	11	3UTR		1	0
hsa-miR-193b-3p	NM_002481	PPP1R12B	AACTGGCCCTCAAAGTCCCGCT#AGTGGGAATGAGAGGGCCGGG#..(((((((((....(((((((#)))))))....))))))))).	13256	13277	0.9807692307692307	-31.1	1	0.00157649	0.441	0	0	-11.1852	16	21	9	3UTR		0	0
hsa-miR-193b-3p	NM_002994	CXCL5	AACTGGCCCTCAAAGTCCCGCT#GGTGGGACACACTGGGGTTGGGGGTGGGG#..((.((((((((.((((((((#)))))))).........)))))))).)).	1806	1835	0.9807692307692307	-26.5	0	0.0198227	0.441	0	0	-9.93288	18	29	8	3UTR		0	0
hsa-miR-193b-3p	NM_003285	TNR	AACTGGCCCTCAAAGTCCCGCT#GGTTTAACCATTTTATAGAAGAGGGAAGGGAGGGCCAGG#..(((((((((....((((.((#.)).))))...))))))))).	10854	10893	0.9807692307692307	-28.7	1	0.000607733	0.559	0	0	-11.1852	15	21	9	3UTR		0	0
hsa-miR-193b-3p	NM_004561	OVOL1	AACTGGCCCTCAAAGTCCCGCT#GGCCTGATGCTGAGAGTGTGTCCTCCTGGGGCTTTAGGGGGCAGG#..(((.((((.(((((((((..#.))))))))).)))).))).	2136	2181	0.9807692307692307	-26.9	0	0.00040498	0.412	2.8142961111111116	3.6982018617499994	-9.68273	16	20	9	3UTR		0	0
hsa-miR-193b-3p	XM_005267864	PSEN1	AACTGGCCCTCAAAGTCCCGCT#GCTGGGGTGAGGGTTTCAGTG#.(((((((((((...((((((.#)).)))))))))))..)))).	5809	5830	0.9807692307692307	-22.4	1	0.00126728	0.485	0	0	-6.67474	17	21	11	3UTR		1	0
hsa-miR-193b-3p	XM_005267866	PSEN1	AACTGGCCCTCAAAGTCCCGCT#GCTGGGGTGAGGGTTTCAGTG#.(((((((((((...((((((.#)).)))))))))))..)))).	5797	5818	0.9807692307692307	-22.4	1	0.00126728	0.485	0	0	-6.67474	17	21	11	3UTR		1	0
hsa-miR-193b-3p	XM_011544167	GNG4	AACTGGCCCTCAAAGTCCCGCT#AGCAGAAAAACTGGGATTTGAGGGCAGGCAGC#..(((((((((.((((((((..#.))))))))))))))...))).	1916	1948	0.9807692307692307	-24.3	1	0.000847715	0.412	0	0	-8.3038	17	22	14	3UTR		0	0
hsa-miR-193b-3p	NM_001082970	NKAPD1	AACTGGCCCTCAAAGTCCCGCT#TGGGATTAGTGGGGGTCT#....((((((((.(((((((..#)))))))..)))))))).	3034	3052	0.9807692307692307	-22.1	0	0.00215895	0.647	0.0569582	0.8389350812499998	-10.8357	15	18	8	3UTR		0	0
hsa-miR-193b-3p	NM_001098721	GNG4	AACTGGCCCTCAAAGTCCCGCT#AGCAGAAAAACTGGGATTTGAGGGCAGGCAGC#..(((((((((.((((((((..#.))))))))))))))...))).	2069	2101	0.9807692307692307	-24.3	1	0.000847715	0.412	0	0	-8.3038	17	22	14	3UTR		0	0
hsa-miR-193b-3p	NM_001126337	TUFT1	AACTGGCCCTCAAAGTCCCGCT#TGAGGCTTTGGGGTCAGA#..(((((((.(((((((.((..#)).)))))))))))))).	2217	2235	0.9807692307692307	-22.4	1	6.016438e-05	0.529	-0.41769	-0.191044	-6.19951	16	18	14	3UTR		0	0
hsa-miR-193b-3p	NM_033181	CNR1	AACTGGCCCTCAAAGTCCCGCT#GGGACAATGGGGCTG#....(((((.((..(((((...#)))))..))))))).	3866	3881	0.9807692307692307	-20.8	0	0.281882	0.676	0.8006118000000001	1.2557542375000001	-12.935	12	15	7	3UTR		0	0
hsa-miR-193b-3p	NM_001301017	NKAPD1	AACTGGCCCTCAAAGTCCCGCT#TGGGATTAGTGGGGGTCT#....((((((((.(((((((..#)))))))..)))))))).	2476	2494	0.9807692307692307	-22.1	0	0.00215895	0.647	0.0569582	0.8389350812499998	-10.8357	15	18	8	3UTR		0	0
hsa-miR-193b-3p	NM_001301019	NKAPD1	AACTGGCCCTCAAAGTCCCGCT#TGGGATTAGTGGGGGTCT#....((((((((.(((((((..#)))))))..)))))))).	2520	2538	0.9807692307692307	-22.1	0	0.00215895	0.647	0.0569582	0.8389350812499998	-10.8357	15	18	8	3UTR		0	0
hsa-miR-193b-3p	NM_001329629	CD276	AACTGGCCCTCAAAGTCCCGCT#AGCCTGGGGCAGGGCAGGGCCAGG#..(((((((((...((((((((#)))..)))))...).)))))))).	2875	2899	0.9807692307692307	-27.3	1	8.203405e-06	0.338	0.29187070000000004	-0.167906	-10.4498	17	24	8	3UTR		0	0
hsa-miR-193b-3p	NM_000021	PSEN1	AACTGGCCCTCAAAGTCCCGCT#GCTGGGGTGAGGGTTTCAGTG#.(((((((((((...((((((.#)).)))))))))))..)))).	5813	5834	0.9807692307692307	-22.4	1	0.00126728	0.485	0	0	-6.67474	17	21	11	3UTR		1	0
hsa-miR-193b-3p	NM_000742	CHRNA2	AACTGGCCCTCAAAGTCCCGCT#GGTCAACCAGGGGGACAGTGGGGCCAGG#..(((((((.((..(((((.((#.)).)))))..))))))))).	2479	2507	0.9807692307692307	-30.5	1	0.0013328	0.412	0	0	-8.34548	16	21	9	3UTR		0	0
hsa-miR-193b-3p	NM_001007530	CDRT15	AACTGGCCCTCAAAGTCCCGCT#AGTGGGTGAGGGGACCAGG#..((((((((((....((((((#))))))))))))..)))).	605	624	0.9807692307692307	-23.4	1	0.000454896	0.412	0	0	-8.07147	16	19	12	3UTR		0	0
hsa-miR-193b-3p	NM_001024736	CD276	AACTGGCCCTCAAAGTCCCGCT#AGCCTGGGGCAGGGCAGGGCCAGG#..(((((((((...((((((((#)))..)))))...).)))))))).	3008	3032	0.9807692307692307	-27.3	1	8.203405e-06	0.338	0	0	-10.4498	17	24	8	3UTR		0	0
hsa-miR-193b-3p	NM_001029882	AHDC1	AACTGGCCCTCAAAGTCCCGCT#AGCGGGGCCCCGAGGTGTCCAGA#..(((((((((...((((((((#))))))))...)))).).)))).	5985	6008	0.9807692307692307	-27.4	1	0.000526941	0.426	0.8544302272727272	0.429417	-10.4498	17	23	8	3UTR	MIRT041200	0	0
hsa-miR-193b-3p	XM_047438833	LIG1	AACTGGCCCTCAAAGTCCCGCT#GGCTGTGGATTTTGAGAGTCAGG#..(((((.((((((((((((((#))).).)))))))))).))))).	2411	2434	0.9846153846153847	-24.6	0	0.00784592	0.426	0	0	-7.27064	19	23	10	3UTR		0	0
hsa-miR-193b-3p	NM_001289063	LIG1	AACTGGCCCTCAAAGTCCCGCT#GGCTGTGGATTTTGAGAGTCAGG#..(((((.((((((((((((((#))).).)))))))))).))))).	2921	2944	0.9846153846153847	-24.6	0	0.00784592	0.426	0	0	-7.27064	19	23	10	3UTR		0	0
hsa-miR-193b-3p	NM_001289064	LIG1	AACTGGCCCTCAAAGTCCCGCT#GGCTGTGGATTTTGAGAGTCAGG#..(((((.((((((((((((((#))).).)))))))))).))))).	2810	2833	0.9846153846153847	-24.6	0	0.00784592	0.426	-0.492489	-0.0249052	-7.27064	19	23	10	3UTR		0	0
hsa-miR-193b-3p	NM_007264	GPR182	AACTGGCCCTCAAAGTCCCGCT#GGGACAAGAGGCCAGA#..((((.((((...(((((...#)))))..)))))))).	1848	1864	0.9846153846153847	-22.2	0	0.000286592	0.382	1.4290664999999998	0.5585701999999998	-11.9935	13	16	8	3UTR		0	0
hsa-miR-193b-3p	NM_001320970	LIG1	AACTGGCCCTCAAAGTCCCGCT#GGCTGTGGATTTTGAGAGTCAGG#..(((((.((((((((((((((#))).).)))))))))).))))).	3011	3034	0.9846153846153847	-24.6	0	0.00784592	0.426	-0.492489	-0.0249052	-7.27064	19	23	10	3UTR		0	0
hsa-miR-193b-3p	NM_001320971	LIG1	AACTGGCCCTCAAAGTCCCGCT#GGCTGTGGATTTTGAGAGTCAGG#..(((((.((((((((((((((#))).).)))))))))).))))).	2924	2947	0.9846153846153847	-24.6	0	0.00784592	0.426	0	0	-7.27064	19	23	10	3UTR		0	0
hsa-miR-193b-3p	NM_000234	LIG1	AACTGGCCCTCAAAGTCCCGCT#GGCTGTGGATTTTGAGAGTCAGG#..(((((.((((((((((((((#))).).)))))))))).))))).	3014	3037	0.9846153846153847	-24.6	0	0.00784592	0.426	-0.492489	-0.0249052	-7.27064	19	23	10	3UTR		0	0
hsa-miR-193b-3p	NM_001160423	IGF2BP1	AACTGGCCCTCAAAGTCCCGCT#GGTGGGAAAGGCTTTGGGGGCTG#....((((((((((((((((((#))))))....)))))))))))).	3571	3594	0.9871794871794872	-28.4	0	0.000116743	0.412	0.8088952954545455	0.8734921149999997	-9.54656	18	23	12	3UTR		0	1
hsa-miR-193b-3p	NM_006546	IGF2BP1	AACTGGCCCTCAAAGTCCCGCT#GGTGGGAAAGGCTTTGGGGGCTG#....((((((((((((((((((#))))))....)))))))))))).	3988	4011	0.9871794871794872	-28.4	0	0.000116743	0.412	0.8088952954545455	0.8734921149999997	-9.54656	18	23	12	3UTR		0	1
hsa-miR-193b-3p	NM_001370181	GSTCD	AACTGGCCCTCAAAGTCCCGCT#AGCACTTTGAGAGGCCAA#...(((((((((((((...(((#))))))))))).))))).	2747	2765	0.9914529914529915	-22	0	0.0015125	0.485	0	0	-6.51454	16	18	11	3UTR		0	0
hsa-miR-193b-3p	NM_001136216	TMEM51	AACTGGCCCTCAAAGTCCCGCT#GTTGTTCTTTGAGGGCTT#....(((((((((((..(.((.#)).)..))))))))))).	1785	1803	0.9914529914529915	-20.8	0	0.00183475	0.456	1.0629057272727274	-0.34079	-9.77961	14	18	11	3UTR		0	0
hsa-miR-193b-3p	NM_001136217	TMEM51	AACTGGCCCTCAAAGTCCCGCT#GTTGTTCTTTGAGGGCTT#....(((((((((((..(.((.#)).)..))))))))))).	1712	1730	0.9914529914529915	-20.8	0	0.00183475	0.456	0.07451636363636362	-0.0156279	-9.77961	14	18	11	3UTR		0	0
hsa-miR-193b-3p	NM_001330439	SMARCD2	AACTGGCCCTCAAAGTCCCGCT#TGGGGCGAGGGTCAGA#..(((((((((...((((((..#))))))))))))))).	1798	1814	1	-25.1	1	1.200674e-05	0.397	1.6289228555555555	4.006858229999999	-10.4498	15	16	15	3UTR		0	0
hsa-miR-193b-3p	NM_001330449	AMDHD2	AACTGGCCCTCAAAGTCCCGCT#AGCGGGATGCCATCAGGGCCGGG#..((((((((....((((((((#))))))))......)))))))).	1350	1373	1	-30.1	1	7.879921e-06	0.309	1.1316229624999998	-0.000939185	-13.2745	16	23	8	3UTR		0	0
hsa-miR-193b-3p	NM_001330453	TTYH2	AACTGGCCCTCAAAGTCCCGCT#AGTGAGGAGGGGGCCAGG#..(((((((((....(((((((#)))).)))))))))))).	1877	1895	1	-25.2	1	0.000144086	0.353	-0.0139963	-0.331655	-11.1852	16	18	12	3UTR		0	0
hsa-miR-193b-3p	NM_001330457	CD300A	AACTGGCCCTCAAAGTCCCGCT#AGCTTGATTGGCTTCCCCGAGGGCCAGC#..(((((((((.(((((.....#.)))))....))))))))).	679	707	1	-22.3	1	0.000394729	0.338	0.12252222222222225	-0.22812	-8.3038	14	20	9	3UTR		0	0
hsa-miR-193b-3p	NM_001330461	ATL2	AACTGGCCCTCAAAGTCCCGCT#AGCAGGACCGTCTGGGCCGGTC#.((((((((.....((((.(((#))).)))).....)))))))).	1583	1605	1	-25.6	1	2.942756e-06	0.544	3.34655	1.98818	-13.3534	15	22	8	3UTR		0	0
hsa-miR-193b-3p	NM_001330508	CCDC40	AACTGGCCCTCAAAGTCCCGCT#AGACGGGGTTTCACCATGTGGGCCAGG#..(((((((.((((((((((((#)).)))))))).....)).))))))).	2297	2324	1	-24.1	1	0.000180331	0.5	0.05769544444444447	-0.0826307	-6.19951	19	27	8	3UTR		0	0
hsa-miR-193b-3p	NM_001330543	EPSTI1	AACTGGCCCTCAAAGTCCCGCT#TGGGGTTTTGAAATTCTTGGGCCAA#...(((((((((((((((((..#))))))))))).......)))))).	2148	2173	1	-21.8	0	0.000823405	0.559	1.3866084166666666	2.11627	-6.51454	17	25	11	3UTR		0	0
hsa-miR-193b-3p	NM_001330552	NLRC5	AACTGGCCCTCAAAGTCCCGCT#AGTCCAGGGGCTCAAGGGCCAGG#..((((((((...((((((...#.))))))..)))))))).	6269	6292	1	-27.2	1	9.016402e-06	0.382	-0.0780729	-0.146778	-12.4177	14	18	8	3UTR		0	0
hsa-miR-193b-3p	NM_001330576	CDH11	AACTGGCCCTCAAAGTCCCGCT#GGTGGGACTGACTGCCCCACTAGAATGTAAGCTCCATGAGGGCAGGG#..((.(((((((.(((((((((#)))))))))...........................))))))).)).	6179	6226	1	-25.8	0	7.681062e-05	0.559	0.7515921888888889	0.7587460725000001	-10.3652	18	47	9	3UTR		0	0
hsa-miR-193b-3p	NM_001330589	CPT2	AACTGGCCCTCAAAGTCCCGCT#GGCGGGTGGATCACTTGAGGTCAGG#..((((.((((.((((((((((#))))))......)))))))))))).	2129	2154	1	-22.3	0	0.000140525	0.456	0.26603923124999995	0.11690932624999997	-9.84749	18	25	12	3UTR		0	0
hsa-miR-193b-3p	NM_001330603	CELF4	AACTGGCCCTCAAAGTCCCGCT#AGACGGGGAGGCTGAAGGGCTGGG#..((((((((((...(((((((#)).)))))....))).))))))).	1939	1963	1	-22.6	1	5.306775e-05	0.397	2.3942432727272727	2.4253209487499996	-7.83842	17	24	7	3UTR		0	0
hsa-miR-193b-3p	NM_001330624	CUL4B	AACTGGCCCTCAAAGTCCCGCT#TGGGGGAGGGCATGGTTA#((((.((((((....(((((..#)))))))))))..)))).	5070	5088	1	-19.3	0	0.0835569	0.529	0	0	-14.2848	15	18	11	3UTR		0	0
hsa-miR-193b-3p	NM_001330654	EIF4B	AACTGGCCCTCAAAGTCCCGCT#TTTTGGGGGCCAGC#..(((((((((((((.......#))))))))))))).	2284	2298	1	-22.7	1	0.000169002	0.588	0.9671112153846154	1.0878127812499998	-5.19005	13	14	13	3UTR	MIRT016421	0	0
hsa-miR-193b-3p	NM_001330665	NTNG1	AACTGGCCCTCAAAGTCCCGCT#AGGGGTAGGAAGGAGATAGACAAGGGCTACCACGAGGCTGGGGGCCAGTA#.((((((((((..((((.((..#.)).)))))))))))))).	5440	5490	1	-25.7	1	2.254562e-05	0.5	0.11554226000000001	-0.119916	-8.42926	16	19	14	3UTR		0	0
hsa-miR-193b-3p	NM_001330689	PIP5K1A	AACTGGCCCTCAAAGTCCCGCT#AGTGGGACATGGGGTA#.....((((.((..((((((((#)))))))).)))))).	2844	2860	1	-20.9	0	0.0990663	0.574	0.9312208375000001	0.43091419499999994	-17.0541	14	16	8	3UTR		0	0
hsa-miR-193b-3p	NM_001330696	RBMS3	AACTGGCCCTCAAAGTCCCGCT#GCGTGTTTGGGGGGCAGA#..(((.((((((((....(((.#)))..)))))))).))).	2551	2569	1	-21.7	0	0.00484568	0.632	0	0	-7.82646	14	18	8	3UTR		0	0
hsa-miR-193b-3p	NM_001330723	SNX27	AACTGGCCCTCAAAGTCCCGCT#GGCGGGGTTTCACCATGATGGCCAGG#..((((((.(((((((((((((#)))))))))).....))).)))))).	4196	4222	1	-25.7	1	0.0020508	0.529	0.054947333333333334	-0.0547795	-6.01339	19	26	10	3UTR		1	1
hsa-miR-193b-3p	NM_001330728	SIRPA	AACTGGCCCTCAAAGTCCCGCT#GGCGGTGCAGGCTCTGGGACCCAGGGGCCAGG#..((((((((....((((((((#.)))...)))))...)))))))).	1987	2019	1	-27	1	2.050363e-09	0.265	0.3290458636363637	0.5005990124999999	-13.2745	16	24	8	3UTR		0	0
hsa-miR-193b-3p	NM_001330741	SLAMF8	AACTGGCCCTCAAAGTCCCGCT#GCTTCCTGAGGGCCAA#...(((((((((((((......#))))..))))))))).	1051	1067	1	-19.7	0	0.000185414	0.529	0.038780853333333344	0.0026663999999999993	-6.51454	13	16	9	3UTR		0	0
hsa-miR-193b-3p	NM_001330753	PPARGC1A	AACTGGCCCTCAAAGTCCCGCT#GTGAGGACTGGGGGCA#.....((((((..((((((((.#))).))))))))))).	2906	2922	1	-22.2	0	0.00372603	0.441	3.204597777777778	2.98388	-18.3015	14	16	11	3UTR		1	0
hsa-miR-193b-3p	NM_001330760	TMEM268	AACTGGCCCTCAAAGTCCCGCT#GGTGGGGCTTTCAGGGTA#.....(((((.(((((((((((#))))))))))).))))).	3861	3879	1	-25.8	0	1.077565e-05	0.485	0.04970945454545457	-0.246312	-16.4904	16	18	11	3UTR		0	0
hsa-miR-193b-3p	NM_001331029	PPP1R12B	AACTGGCCCTCAAAGTCCCGCT#AGTGGGAATGAGAGGGCCGGG#..(((((((((....(((((((#)))))))....))))))))).	13439	13460	1	-31.1	1	0.00157649	0.441	-0.656602	0.6333812624999999	-11.1852	16	21	9	3UTR		0	0
hsa-miR-193b-3p	NM_001331029	PPP1R12B	AACTGGCCCTCAAAGTCCCGCT#AGTGGTCTGTGGGGAGCCAGTTG#((((((((((((.((..(((((#))))).)).))))).))))))).	14774	14797	1	-26.1	1	1.983415e-05	0.368	1.6369290015384612	0.644375	-5.45975	19	23	7	3UTR		0	0
hsa-miR-193b-3p	NM_001331034	TMCC2	AACTGGCCCTCAAAGTCCCGCT#GGCTGGGCTCTGCAGGCCAGG#..((((((..((.(((((.(((#))).))))).))..)))))).	2159	2180	1	-24.7	1	9.939738e-06	0.397	-0.294475	0.14721	-8.54503	16	21	6	3UTR		0	0
hsa-miR-193b-3p	NM_001331039	TRMT2A	AACTGGCCCTCAAAGTCCCGCT#AGCCAAGGCTGTGAGGGCCAGA#..((((((((((.((((..(((#)))...)))).)))))))))).	2472	2494	1	-27.7	1	1.795425e-05	0.485	-0.318682	0.7557244870000004	-6.24613	17	22	10	3UTR	MIRT041422	0	0
hsa-miR-193b-3p	NM_001346011	GZMB	AACTGGCCCTCAAAGTCCCGCT#AGCCAAGTCCAGATTTACACTGGGAGAGGTGCCAGC#..(((((((((....(((((..#.))))))))).))))).	835	871	1	-21.7	1	1.012761e-05	0.515	0.6543770799999999	0.546442	-11.1852	14	17	9	3UTR		0	0
hsa-miR-193b-3p	NM_001346143	FLRT2	AACTGGCCCTCAAAGTCCCGCT#GCAGTACTTTGGGAGGCCAA#...(((((((((((((.(.((.#)).).)))))))).))))).	13053	13073	1	-22.7	0	3.155102e-05	0.485	0	0	-6.51454	16	20	8	3UTR		0	0
hsa-miR-193b-3p	NM_001346146	FLRT2	AACTGGCCCTCAAAGTCCCGCT#GCAGTACTTTGGGAGGCCAA#...(((((((((((((.(.((.#)).).)))))))).))))).	12544	12564	1	-22.7	0	3.155102e-05	0.485	0	0	-6.51454	16	20	8	3UTR		0	0
hsa-miR-193b-3p	NM_001346450	TCF7	AACTGGCCCTCAAAGTCCCGCT#GCGGGACAGAGGACCAT#...(((.((((...(((((((.#))))))).)))).))).	2224	2241	1	-24.8	0	0.00429397	0.441	0	0	-13.551	14	17	7	3UTR		0	0
hsa-miR-193b-3p	NM_001346744	CBX7	AACTGGCCCTCAAAGTCCCGCT#GGCTTGGGGTGGGACTTCCAGAGATAGGGATGGGTTGGGGGCGGGG#..((.(((((((((((((((((#.))))))))))..................))))))).)).	750	796	1	-30.3	0	0.0103446	0.544	-0.501282	-0.306251	-9.07604	19	40	10	3UTR		1	1
hsa-miR-193b-3p	NM_001347217	WDR13	AACTGGCCCTCAAAGTCCCGCT#GGTGGTCATGCTGAGGGCCGGC#..((((((((((..((.(((((#)))))..))..)))))))))).	1692	1714	1	-26.3	1	3.439417e-05	0.397	0.0759802	0.293324	-7.10297	17	22	10	3UTR		0	0
hsa-miR-193b-3p	NM_001347217	WDR13	AACTGGCCCTCAAAGTCCCGCT#TGGGACCTTAGGGTCAGTC#.(((((((((.((.((((((..#)))))).))))))))))).	3367	3386	1	-25	1	2.34584e-07	0.426	0.12221871111111114	0.060386134999999994	-7.47494	17	19	11	3UTR		0	0
hsa-miR-193b-3p	NM_001347723	DYRK1A	AACTGGCCCTCAAAGTCCCGCT#GGTGGGGCCTGGAGCTCTGTTTTCTGAAACTTTGCGGGCCAT#...((((((.((((((((((((#))))))......................)))))).)))))).	9077	9119	1	-25.6	0	0.00100953	0.412	0	0	-7.75705	18	42	6	3UTR		1	0
hsa-miR-193b-3p	NM_001347884	GVQW3	AACTGGCCCTCAAAGTCCCGCT#AGCTGGGAGTCATCCATGGAGAGGGTGATGGAAACTGTGGGCCAGG#..(((((((.((...(((((((#.))))..)))...)).))))))).	1437	1483	1	-23.4	1	0.00116708	0.441	1.5414802222222221	0.964403	-9.08093	16	24	7	3UTR		0	0
hsa-miR-193b-3p	NM_001348119	TRIM16	AACTGGCCCTCAAAGTCCCGCT#GGGTGATTTGGGGGCAGA#..((.(((((((((..(((...#)))...))))))))))).	2766	2784	1	-21.3	0	0.00047844	0.559	0.46949500666666666	0.30990523350000004	-10.0445	14	18	11	3UTR		0	0
hsa-miR-193b-3p	NM_001348122	TRIM16	AACTGGCCCTCAAAGTCCCGCT#TGGGATTTGCATTTTAGGGTGATTTGGGGGCAGA#..((.(((((((((..(((...#.)))...))))))))))).	1544	1578	1	-21	0	0.00047844	0.559	1.5439776666666665	2.24563	-10.0445	14	19	11	3UTR		0	0
hsa-miR-193b-3p	NM_001348124	TRIM16	AACTGGCCCTCAAAGTCCCGCT#TGGGATTTGCATTTTAGGGTGATTTGGGGGCAGA#..((.(((((((((..(((...#.)))...))))))))))).	1891	1925	1	-21	0	0.00047844	0.559	0.4155113177777778	0.15276067150000008	-10.0445	14	19	11	3UTR		0	0
hsa-miR-193b-3p	NM_001348190	LHX6	AACTGGCCCTCAAAGTCCCGCT#AGTGGTGCTTGGGCCAGG#..(((((((...((((.(((((#))))).))))))))))).	1960	1978	1	-24.4	1	0.000213783	0.485	0.7811732857142858	1.5388576074999998	-12.3711	16	18	11	3UTR		0	0
hsa-miR-193b-3p	NM_001348233	OR6J1	AACTGGCCCTCAAAGTCCCGCT#GGCTGGAGTGGCCACTTTGGGTGCCAGG#..(((((.((((((((.(((((#.)))))..)))))))).))))).	2130	2158	1	-25.8	0	1.331896e-05	0.485	0	0	-7.27064	18	23	8	3UTR		0	0
hsa-miR-193b-3p	NM_001348367	SERPINB8	AACTGGCCCTCAAAGTCCCGCT#AGGGCCAGTG#.(((((((((............#))))))))).	1338	1348	1	-17.9	1	0.000336874	0.574	-0.0344243	-0.285828	-13.0794	9	10	9	3UTR		0	0
hsa-miR-193b-3p	NM_001348487	RIMS2	AACTGGCCCTCAAAGTCCCGCT#GGCGGGAATCAGAGCAGTCAGTC#.((((((.(((....(((((((#)))))))....)))..)))))).	4858	4881	1	-22.9	1	0.0129326	0.426	0.35685019999999995	0.6399516725000002	-12.3352	16	23	7	3UTR		0	0
hsa-miR-193b-3p	NM_001348488	RIMS2	AACTGGCCCTCAAAGTCCCGCT#GGCGGGAATCAGAGCAGTCAGTC#.((((((.(((....(((((((#)))))))....)))..)))))).	4912	4935	1	-22.9	1	0.0129326	0.426	0.7082116285714285	0.8333838425000003	-12.3352	16	23	7	3UTR		0	0
hsa-miR-193b-3p	NM_001348489	RIMS2	AACTGGCCCTCAAAGTCCCGCT#GGCGGGAATCAGAGCAGTCAGTC#.((((((.(((....(((((((#)))))))....)))..)))))).	5428	5451	1	-22.9	1	0.0129326	0.426	0.35685019999999995	0.6399516725000002	-12.3352	16	23	7	3UTR		0	0
hsa-miR-193b-3p	NM_001348490	RIMS2	AACTGGCCCTCAAAGTCCCGCT#GGCGGGAATCAGAGCAGTCAGTC#.((((((.(((....(((((((#)))))))....)))..)))))).	5341	5364	1	-22.9	1	0.0129326	0.426	1.95261	1.7979790487499998	-12.3352	16	23	7	3UTR		0	0
hsa-miR-193b-3p	NM_001348494	RIMS2	AACTGGCCCTCAAAGTCCCGCT#GGCGGGAATCAGAGCAGTCAGTC#.((((((.(((....(((((((#)))))))....)))..)))))).	4987	5010	1	-22.9	1	0.0129326	0.426	1.5426950000000001	1.0127238850000002	-12.3352	16	23	7	3UTR		0	0
hsa-miR-193b-3p	NM_001348501	RIMS2	AACTGGCCCTCAAAGTCCCGCT#GGCGGGAATCAGAGCAGTCAGTC#.((((((.(((....(((((((#)))))))....)))..)))))).	4617	4640	1	-22.9	1	0.0129326	0.426	1.9965356285714289	2.681872566249999	-12.3352	16	23	7	3UTR		0	0
hsa-miR-193b-3p	NM_001348509	RIMS2	AACTGGCCCTCAAAGTCCCGCT#GGCGGGAATCAGAGCAGTCAGTC#.((((((.(((....(((((((#)))))))....)))..)))))).	4860	4883	1	-22.9	1	0.0129326	0.426	1.1631039428571428	1.60847	-12.3352	16	23	7	3UTR		0	0
hsa-miR-193b-3p	NM_001348688	ZNF726	AACTGGCCCTCAAAGTCCCGCT#GGTGGATCCCTTCTGTAAAACCAGGATTTTGAGAGGCCGGG#..((((((((((((((((....#.)))))))))).)))))).	1518	1559	1	-27.6	1	0.000670342	0.515	-0.277834	0.034675873750000044	-4.957	16	19	10	3UTR		0	0
hsa-miR-193b-3p	NM_001348731	KIDINS220	AACTGGCCCTCAAAGTCCCGCT#CGGGGCTGTCCTGAGCTGTTAGGAGAGTAGATGCGGGGAGGGCTGGTG#.((((((((((.....(((((.#.))))))))))))))).	6053	6101	1	-26.7	1	0.000352948	0.441	0	0	-10.2546	15	17	15	3UTR		0	0
hsa-miR-193b-3p	NM_001348800	ZBTB20	AACTGGCCCTCAAAGTCCCGCT#GCCTCTCTATCTCAAATCATTGCCTTCTTAGGGACTGGGGGCCAA#...((((((((..((((((...#.)))))))))))))).	23342	23387	1	-26.8	0	0.000395332	0.515	0	0	-11.1505	14	16	14	3UTR		0	0
hsa-miR-193b-3p	NM_001348803	ZBTB20	AACTGGCCCTCAAAGTCCCGCT#GCCTCTCTATCTCAAATCATTGCCTTCTTAGGGACTGGGGGCCAA#...((((((((..((((((...#.)))))))))))))).	23465	23510	1	-26.8	0	0.000395332	0.515	0	0	-11.1505	14	16	14	3UTR		0	0
hsa-miR-193b-3p	NM_001349074	TBC1D5	AACTGGCCCTCAAAGTCCCGCT#AGCCCTGGGGTTGCTAAGGAAGCTGCTTCAGGGAGTTGGGGGTTAGTTG#(((((((((((((..((((...#.)))).))))))))))))).	5768	5817	1	-26.3	1	0.0248772	0.456	0	0	-5.52986	17	20	13	3UTR		0	0
hsa-miR-193b-3p	NM_001349180	XYLB	AACTGGCCCTCAAAGTCCCGCT#GGCGGGCACATCACGAGGTCAGG#..((((.((((...((((((((#)))))).)).....)))))))).	502	525	1	-21	0	0.0139935	0.456	-0.153071	-0.0614438	-11.9935	16	23	8	3UTR		0	0
hsa-miR-193b-3p	NM_001349247	TRAK1	AACTGGCCCTCAAAGTCCCGCT#AGCTTACGGTGAGGACTGGAGGGGGGCCGGTTG#(((((((((((..(((((((((#.)))).)))))....))))))))))).	3056	3089	1	-32.8	1	6.796714e-07	0.397	-0.267116	1.2943	-8.57351	20	27	11	3UTR		0	0
hsa-miR-193b-3p	NM_001349337	FOXP1	AACTGGCCCTCAAAGTCCCGCT#GGCCCTGGGCTTTGGGGGGGTCCCAA#...(((((((((((((((.(((#)))...))))))))))))....))).	3461	3487	1	-24.4	0	1.795105e-06	0.515	1.032684157894737	0.4379952549999999	-6.51454	18	26	12	3UTR		0	0
hsa-miR-193b-3p	NM_001349337	FOXP1	AACTGGCCCTCAAAGTCCCGCT#GGGAGTTAACGAGGGCTGAGTTC#(((((((((((.((.((((...#)))).))...))))))).)))).	3328	3351	1	-23.8	1	7.955918e-05	0.647	0.1126640166666667	0.6528834549999999	-8.01983	17	23	7	3UTR		0	0
hsa-miR-193b-3p	NM_001349340	FOXP1	AACTGGCCCTCAAAGTCCCGCT#GGGAGTTAACGAGGGCTGAGTTC#(((((((((((.((.((((...#)))).))...))))))).)))).	3931	3954	1	-23.8	1	7.955918e-05	0.647	3.94466	3.1902584999999997	-8.01983	17	23	7	3UTR		0	0
hsa-miR-193b-3p	NM_001349342	FOXP1	AACTGGCCCTCAAAGTCCCGCT#GGCCCTGGGCTTTGGGGGGGTCCCAA#...(((((((((((((((.(((#)))...))))))))))))....))).	3482	3508	1	-24.4	0	1.795105e-06	0.515	0.4800032421052631	0.7396857325000001	-6.51454	18	26	12	3UTR		0	0
hsa-miR-193b-3p	NM_001349343	FOXP1	AACTGGCCCTCAAAGTCCCGCT#GGCCCTGGGCTTTGGGGGGGTCCCAA#...(((((((((((((((.(((#)))...))))))))))))....))).	3479	3505	1	-24.4	0	1.795105e-06	0.515	0.6137163789473683	0.660293	-6.51454	18	26	12	3UTR		0	0
hsa-miR-193b-3p	NM_001349343	FOXP1	AACTGGCCCTCAAAGTCCCGCT#GGGAGTTAACGAGGGCTGAGTTC#(((((((((((.((.((((...#)))).))...))))))).)))).	3346	3369	1	-23.8	1	7.955918e-05	0.647	0.13383477499999996	0.21781412124999994	-8.01983	17	23	7	3UTR		0	0
hsa-miR-193b-3p	NM_001349344	FOXP1	AACTGGCCCTCAAAGTCCCGCT#GGCCCTGGGCTTTGGGGGGGTCCCAA#...(((((((((((((((.(((#)))...))))))))))))....))).	3371	3397	1	-24.4	0	1.795105e-06	0.515	0.2482340631578947	0.14159789375000004	-6.51454	18	26	12	3UTR		0	0
hsa-miR-193b-3p	NM_001349344	FOXP1	AACTGGCCCTCAAAGTCCCGCT#GGGAGTTAACGAGGGCTGAGTTC#(((((((((((.((.((((...#)))).))...))))))).)))).	3238	3261	1	-23.8	1	7.955918e-05	0.647	0.14181257500000002	1.1076212675000003	-8.01983	17	23	7	3UTR		0	0
hsa-miR-193b-3p	NM_001349370	SETD2	AACTGGCCCTCAAAGTCCCGCT#GGTGGGAGGATGGGTGGTCAGG#..((((((((((...(((((((#)))))))...)))).)))))).	7880	7902	1	-26.3	1	0.00165491	0.441	0	0	-7.83842	17	22	7	3UTR		0	0
hsa-miR-193b-3p	NM_001349442	NEIL2	AACTGGCCCTCAAAGTCCCGCT#GGCAGGGACGGGGTACAGAGGATAGTGTGGGTCAGAGGTGCCAGTA#.((((((((((...(.(((((.#.))))).).)))).)))))).	1320	1366	1	-26.8	1	0.000852106	0.515	0	0	-9.51915	16	21	6	3UTR	MIRT041564	0	0
hsa-miR-193b-3p	NM_001349514	PXK	AACTGGCCCTCAAAGTCCCGCT#GGAACTTTGAGGAAAGCCAA#...(((((((((((((.((...#)).)))))))))...)))).	1762	1782	1	-21.8	0	0.00639471	0.559	3.6973560625000004	3.24154	-6.51454	15	20	9	3UTR		0	0
hsa-miR-193b-3p	NM_001349547	ARHGAP26	AACTGGCCCTCAAAGTCCCGCT#GCAGGATGAAGAGGGTTAA#...((((((((...((((.((.#)).))))...)))))))).	2681	2700	1	-21	0	0.00420428	0.588	0.990311	0.8834067400000003	-12.0073	14	19	8	3UTR		0	0
hsa-miR-193b-3p	NM_001349683	HSPB7	AACTGGCCCTCAAAGTCCCGCT#AGTACAGGGGCTGGGGTCAGG#..((((((((...((((((...#.)))))))))))))).	844	865	1	-24.3	1	4.529882e-06	0.456	0.372695	-0.132675	-12.4177	14	16	14	3UTR		0	0
hsa-miR-193b-3p	NM_001349723	DNAJB5	AACTGGCCCTCAAAGTCCCGCT#AGCCTTCATCAGGAAGGGAAAGGGCTTTGGGGTCAGG#..(((((((.((((((((....#.))))))))))))))).	2252	2289	1	-26.1	1	0.000272582	0.441	0	0	-6.19951	15	17	15	3UTR		0	0
hsa-miR-193b-3p	NM_001349724	DNAJB5	AACTGGCCCTCAAAGTCCCGCT#AGGGAAAGGGCTTTGGGGTCAGG#..(((((((.((((((((....#.))))))))))))))).	2065	2088	1	-26.1	1	0.000272582	0.441	1.2787052250000002	1.0200089287499998	-6.19951	15	17	15	3UTR		0	0
hsa-miR-193b-3p	NM_001349772	RUBCNL	AACTGGCCCTCAAAGTCCCGCT#GGGGCCTTGAGGCTGGG#..((((.((((((.(((((...#))))).)))))))))).	3214	3231	1	-22.9	0	1.923232e-05	0.515	0	0	-7.35753	15	17	10	3UTR		0	0
hsa-miR-193b-3p	NM_001349807	ZNF7	AACTGGCCCTCAAAGTCCCGCT#GGCGGGCACATCACGAGGTCAGG#..((((.((((...((((((((#)))))).)).....)))))))).	2342	2365	1	-21	0	0.0149002	0.412	0	0	-11.9935	16	23	8	3UTR		0	0
hsa-miR-193b-3p	NM_001349999	RBFOX2	AACTGGCCCTCAAAGTCCCGCT#GCAGATTTTCCCCCAGATACTAGGAGGAAAGGGACTTTGGGGGGTGGG#..(((.(((((((((((((...#.))))))))))))).))).	5374	5422	1	-29.5	0	0.0261052	0.471	0	0	-6.85796	16	19	13	3UTR		0	0
hsa-miR-193b-3p	NM_001350134	ZNF654	AACTGGCCCTCAAAGTCCCGCT#GTGGGGAGGGGGGCTGGTTT#(((((((((((....((((((.#))))))..))))))))))).	3818	3838	1	-27	1	0.000781568	0.662	0.2685919454545455	1.1327	-10.1658	17	20	11	3UTR		0	0
hsa-miR-193b-3p	NM_001350306	EPB41L2	AACTGGCCCTCAAAGTCCCGCT#AGGGGGAGGGGGCTGTGGTG#.((((((((((....((((.((#)).)))))))))))..))).	3903	3923	1	-21.4	1	0.00154346	0.471	1.20066	1.4912121487500003	-10.0215	16	20	11	3UTR		0	0
hsa-miR-193b-3p	NM_001350309	EPB41L2	AACTGGCCCTCAAAGTCCCGCT#AGGGGGAGGGGGCTGTGGTG#.((((((((((....((((.((#)).)))))))))))..))).	3645	3665	1	-21.4	1	0.00154346	0.471	1.2895664083333334	1.5142461000000003	-10.0215	16	20	11	3UTR		0	0
hsa-miR-193b-3p	NM_001350494	NT5DC4	AACTGGCCCTCAAAGTCCCGCT#AGCTGATGACAATGGCTGAAAGGGCCAGG#..((((((((...((((.....#.))))...)))))))).	1439	1468	1	-21.6	1	1.362206e-06	0.559	0.29942314999999997	0.07005756375000001	-12.4177	12	17	8	3UTR		0	0
hsa-miR-193b-3p	NM_001350849	UCHL5	AACTGGCCCTCAAAGTCCCGCT#AGTGGTGATGGGGGTCT#....((((((((...(((((((#))))).)))))))))).	1773	1790	1	-19.9	0	0.000288446	0.647	0.027976337500000004	0.22621596249999998	-12.428	15	17	10	3UTR		0	0
hsa-miR-193b-3p	NM_001350994	SMIM32	AACTGGCCCTCAAAGTCCCGCT#AGCACGGGCAGTGGGAGGCCGGTG#.(((((((((((..((((.(((#)))..))))..)))).))))))).	1591	1615	1	-26	1	6.320641e-07	0.338	0.07605108333333331	0.050144378749999996	-5.9393	18	24	7	3UTR		0	0
hsa-miR-193b-3p	NM_001351021	VPS33A	AACTGGCCCTCAAAGTCCCGCT#AGCAGGGACATGTTGGGTTGGTA#.((((((((.....((((((((#))).))))).....)))))))).	1125	1148	1	-22.9	1	0.0119398	0.5	3.781993333333334	3.41878	-13.3534	16	23	8	3UTR		0	0
hsa-miR-193b-3p	NM_001351144	PRMT7	AACTGGCCCTCAAAGTCCCGCT#AGCACAGGGAGCTTGTGGGGCTGGCCGGTG#.(((((((.....((((((((.#.))))))))))))))).	2693	2723	1	-25.5	1	2.357892e-06	0.294	0	0	-13.5529	15	17	15	3UTR		0	0
hsa-miR-193b-3p	NM_001351144	PRMT7	AACTGGCCCTCAAAGTCCCGCT#AGTGGCCTGAGGGCTGGG#..((((((((((.....(((((#)))))..)))))))))).	2398	2416	1	-22.2	1	4.772808e-06	0.441	0	0	-8.07147	15	18	10	3UTR		0	0
hsa-miR-193b-3p	NM_001351148	TESPA1	AACTGGCCCTCAAAGTCCCGCT#GGCAGAGACAAAAGGGCTAGG#..((((((((....((((.(((#))).).)))...)))))))).	2904	2925	1	-20	1	0.0329353	0.588	4.96556	2.9298266437499993	-13.2745	15	21	8	3UTR		0	0
hsa-miR-193b-3p	NM_001351278	TMEM107	AACTGGCCCTCAAAGTCCCGCT#GGGGCAAGGGCCGC#...(((((((....(((((...#))))).))))))).	551	565	1	-20.7	0	1.003839e-06	0.426	0.13866899999999996	-0.0238743	-14.8321	12	14	7	3UTR		0	0
hsa-miR-193b-3p	NM_001351289	MGAT4C	AACTGGCCCTCAAAGTCCCGCT#GGTGGGACACAGGCCAA#...(((((......((((((((#))))))))...))))).	20429	20446	1	-21	0	0.000556148	0.618	-0.0132909	-0.0740306	-17.131	13	17	8	3UTR		0	0
hsa-miR-193b-3p	NM_001351291	MGAT4C	AACTGGCCCTCAAAGTCCCGCT#GGTGGGACACAGGCCAA#...(((((......((((((((#))))))))...))))).	21453	21470	1	-21	0	0.000556148	0.618	-0.152678	0.13683060100000005	-17.131	13	17	8	3UTR		0	0
hsa-miR-193b-3p	NM_001351447	IL1RL2	AACTGGCCCTCAAAGTCCCGCT#GGTGGGTGAGGGCGGGTG#.(((.(((((((....((((((#))))))))))))).))).	1768	1786	1	-26.8	0	0.00183531	0.397	0.33041871428571434	-0.390364	-11.0268	16	18	13	3UTR		0	0
hsa-miR-193b-3p	NM_001351472	ELAVL2	AACTGGCCCTCAAAGTCCCGCT#GGTTGGGGAAGGGGGGGCTAC#...((((((((....(((((((#))).))))....)))))))).	2063	2084	1	-21.2	0	0.00833706	0.618	2.95874	2.6816267889999996	-12.7428	15	21	8	3UTR		0	0
hsa-miR-193b-3p	NM_001351611	POLI	AACTGGCCCTCAAAGTCCCGCT#TGGGACATGGTGGGGGCTT#....((((((((..((((((..#))))))....)))))))).	5621	5640	1	-23.2	0	0.000303516	0.603	0	0	-11.6925	14	19	8	3UTR		0	0
hsa-miR-193b-3p	NM_001351613	POLI	AACTGGCCCTCAAAGTCCCGCT#TGGGACATGGTGGGGGCTT#....((((((((..((((((..#))))))....)))))))).	5441	5460	1	-23.2	0	0.000303516	0.603	-0.343873	0.11093093462499998	-11.6925	14	19	8	3UTR		0	0
hsa-miR-193b-3p	NM_001351615	POLI	AACTGGCCCTCAAAGTCCCGCT#TGGGACATGGTGGGGGCTT#....((((((((..((((((..#))))))....)))))))).	5828	5847	1	-23.2	0	0.000303516	0.603	-0.343873	0.11093093462499998	-11.6925	14	19	8	3UTR		0	0
hsa-miR-193b-3p	NM_001351624	MAPK10	AACTGGCCCTCAAAGTCCCGCT#GTGGGACCAATGGCCAGTA#.(((((((......(((((((.#)))))))....))))))).	6095	6114	1	-25.4	1	0.00212707	0.618	2.343958571428572	2.1219077724999997	-14.4098	14	19	7	3UTR		1	1
hsa-miR-193b-3p	NM_001351625	MAPK10	AACTGGCCCTCAAAGTCCCGCT#GTGGGACCAATGGCCAGTA#.(((((((......(((((((.#)))))))....))))))).	6100	6119	1	-25.4	1	0.00212707	0.618	2.1847582857142855	1.93501	-14.4098	14	19	7	3UTR		1	1
hsa-miR-193b-3p	NM_001351774	ZNF320	AACTGGCCCTCAAAGTCCCGCT#AGCACTTTGAGAGGCCAA#...(((((((((((((...(((#))))))))))).))))).	2042	2060	1	-22	0	0.00996281	0.515	-0.155947	-0.0389511	-6.51454	16	18	11	3UTR		0	0
hsa-miR-193b-3p	NM_001352057	MLST8	AACTGGCCCTCAAAGTCCCGCT#GGACGGGCCAGGCTGGGCCAGG#..(((((((.......((((((#)).)))).......))))))).	1567	1589	1	-22.9	1	2.89009e-11	0.353	0.09765345714285718	2.4956462500000005	-15.4856	13	22	7	3UTR		0	0
hsa-miR-193b-3p	NM_001352618	MEF2A	AACTGGCCCTCAAAGTCCCGCT#AGCTGGACTTTGTTGCCAT#...((((...((((((((.(((#))).))))))))..)))).	5368	5387	1	-21.1	0	0.00226609	0.603	0	0	-11.1271	15	19	8	3UTR		0	0
hsa-miR-193b-3p	NM_001352959	SPIDR	AACTGGCCCTCAAAGTCCCGCT#GGTGGTGGTGGTGATTTGGGGTAGTTA#(((((.(((...((((((((((#.))))).)))))))).))))).	1314	1341	1	-20.4	0	0.0335705	0.529	0	0	-13.2526	18	22	8	3UTR		0	0
hsa-miR-193b-3p	NM_001352960	SPIDR	AACTGGCCCTCAAAGTCCCGCT#GGTGGTGGTGGTGATTTGGGGTAGTTA#(((((.(((...((((((((((#.))))).)))))))).))))).	1435	1462	1	-20.4	0	0.0335705	0.529	0.25408175454545456	0.55842	-13.2526	18	22	8	3UTR		0	0
hsa-miR-193b-3p	NM_001353177	TMUB2	AACTGGCCCTCAAAGTCCCGCT#GGCCCTAGGCTCTTGCTTCTGGGGCTATTGGAGGGTCAGTG#.((((((((((..(((((((..#.)))))))....)))))))))).	1985	2026	1	-29.2	1	0.000878987	0.515	0.8218344999999999	0.8576858699999999	-8.42926	17	23	10	3UTR		0	0
hsa-miR-193b-3p	NM_001353182	TMUB2	AACTGGCCCTCAAAGTCCCGCT#GGCCCTAGGCTCTTGCTTCTGGGGCTATTGGAGGGTCAGTG#.((((((((((..(((((((..#.)))))))....)))))))))).	1918	1959	1	-29.2	1	0.000878987	0.515	0.8218344999999999	0.8576858699999999	-8.42926	17	23	10	3UTR		0	0
hsa-miR-193b-3p	NM_001353214	DYM	AACTGGCCCTCAAAGTCCCGCT#AGCCACTGGGGCCACATTGAGGGCCAGTTG#(((((((((((((.((((((..#.))))))....))))))))))))).	3720	3750	1	-31.9	1	9.400814e-06	0.426	0	0	-4.79441	19	25	13	3UTR		0	0
hsa-miR-193b-3p	NM_001353320	IGSF11	AACTGGCCCTCAAAGTCCCGCT#GGTGGGGTGGGGAGTGCTGGG#..(((((.(((...((((((((#))))))))...))).))))).	1574	1595	1	-20.1	0	0.0303143	0.515	0.47609487500000003	0.6428532166250003	-12.7634	16	21	8	3UTR		0	0
hsa-miR-193b-3p	NM_001353322	IGSF11	AACTGGCCCTCAAAGTCCCGCT#GGTGGGGTGGGGAGTGCTGGG#..(((((.(((...((((((((#))))))))...))).))))).	1631	1652	1	-20.1	0	0.0303143	0.515	1.42771	0.925161	-12.7634	16	21	8	3UTR		0	0
hsa-miR-193b-3p	NM_001353453	CCDC160	AACTGGCCCTCAAAGTCCCGCT#GCCTCAATCCTTGGGTGGAAGTGATGGGCCAGTTG#((((((((((((.....(((((#.)))))...))).))))))))).	2181	2216	1	-25.3	1	0.000213887	0.559	2.3256788076923076	0.814693	-7.05204	17	23	9	3UTR		0	0
hsa-miR-193b-3p	NM_001353698	CELF4	AACTGGCCCTCAAAGTCCCGCT#AGACGGGGAGGCTGAAGGGCTGGG#..((((((((((...(((((((#)).)))))....))).))))))).	1942	1966	1	-22.6	1	5.306775e-05	0.397	2.5895819090909087	1.67829	-7.83842	17	24	7	3UTR		0	0
hsa-miR-193b-3p	NM_001353967	STAMBP	AACTGGCCCTCAAAGTCCCGCT#GGTGGGTCTGGGGGCCAGC#..(((((((((..((.((((((#)))))).))))))))))).	2802	2821	1	-29.6	1	7.59866e-06	0.441	0	0	-9.82598	17	19	11	3UTR		0	0
hsa-miR-193b-3p	NM_001353968	STAMBP	AACTGGCCCTCAAAGTCCCGCT#GGTGGGTCTGGGGGCCAGC#..(((((((((..((.((((((#)))))).))))))))))).	2770	2789	1	-29.6	1	7.59866e-06	0.441	0	0	-9.82598	17	19	11	3UTR		0	0
hsa-miR-193b-3p	NM_001353969	STAMBP	AACTGGCCCTCAAAGTCCCGCT#GGTGGGTCTGGGGGCCAGC#..(((((((((..((.((((((#)))))).))))))))))).	2752	2771	1	-29.6	1	7.59866e-06	0.441	0	0	-9.82598	17	19	11	3UTR		0	0
hsa-miR-193b-3p	NM_001353970	STAMBP	AACTGGCCCTCAAAGTCCCGCT#GGTGGGTCTGGGGGCCAGC#..(((((((((..((.((((((#)))))).))))))))))).	2932	2951	1	-29.6	1	7.59866e-06	0.441	0	0	-9.82598	17	19	11	3UTR		0	0
hsa-miR-193b-3p	NM_001353972	STAMBP	AACTGGCCCTCAAAGTCCCGCT#GGTGGGTCTGGGGGCCAGC#..(((((((((..((.((((((#)))))).))))))))))).	2481	2500	1	-29.6	1	7.59866e-06	0.441	0	0	-9.82598	17	19	11	3UTR		0	0
hsa-miR-193b-3p	NM_001353974	STAMBP	AACTGGCCCTCAAAGTCCCGCT#GGTGGGTCTGGGGGCCAGC#..(((((((((..((.((((((#)))))).))))))))))).	3358	3377	1	-29.6	1	7.59866e-06	0.441	0	0	-9.82598	17	19	11	3UTR		0	0
hsa-miR-193b-3p	NM_001354045	WDPCP	AACTGGCCCTCAAAGTCCCGCT#AGGGGGTATTTTGGTTGTGGCCAGTTT#(((((((((((((((((((.((#)).))).)))))))..).)))))))).	2271	2298	1	-25.4	1	0.000123777	0.603	0	0	-3.93757	21	27	8	3UTR		0	0
hsa-miR-193b-3p	NM_001354138	MIA2	AACTGGCCCTCAAAGTCCCGCT#AGTGGGAGTTTTATATATGTAATCTTTCAGGTGGGGAGGCTT#....((((((((((.(((((((#))))))).)))......................))).)))).	2657	2699	1	-18.5	0	0.000125659	0.618	0.5227246337878789	1.1276853351875002	-10.282	17	42	7	3UTR		0	0
hsa-miR-193b-3p	NM_001354140	MIA2	AACTGGCCCTCAAAGTCCCGCT#AGTGGGAGTTTTATATATGTAATCTTTCAGGTGGGGAGGCTT#....((((((((((.(((((((#))))))).)))......................))).)))).	2700	2742	1	-18.5	0	0.000125659	0.618	0.5227246337878789	1.1276853351875002	-10.282	17	42	7	3UTR		0	0
hsa-miR-193b-3p	NM_001354473	SERTM2	AACTGGCCCTCAAAGTCCCGCT#AGCTGGTTGGGAGGGCTGGTTT#(((((((((((..((.((.(((#))).))))..))))))))))).	1566	1588	1	-24.1	1	1.400084e-06	0.5	1.711627090909091	1.06501	-8.80656	18	22	11	3UTR		0	0
hsa-miR-193b-3p	NM_001354602	TMEM269	AACTGGCCCTCAAAGTCCCGCT#CGGGCTTGAGGGTCT#....(((((((.(((.((((..#)))))))))))))).	2890	2905	1	-22.5	0	0.000289925	0.574	-0.325986	-0.0676356	-13.1264	14	15	14	3UTR		0	0
hsa-miR-193b-3p	NM_001354604	MITF	AACTGGCCCTCAAAGTCCCGCT#AGCTGATTTTGAGGGTTT#....(((((((((((((..(((#))).))))))))))))).	3928	3946	1	-21	0	0.000610896	0.676	0.4466862230769232	0.48593632124999997	-9.54656	16	18	13	3UTR		0	0
hsa-miR-193b-3p	NM_001354607	MITF	AACTGGCCCTCAAAGTCCCGCT#AGCTGATTTTGAGGGTTT#....(((((((((((((..(((#))).))))))))))))).	4039	4057	1	-21	0	0.000610896	0.676	0	0	-9.54656	16	18	13	3UTR		0	0
hsa-miR-193b-3p	NM_001354750	ZBTB16	AACTGGCCCTCAAAGTCCCGCT#GCTGGGCCATTGAGGTTTGAGGGCCTGTG#.((.((((((((((((((.((.#)).))))........)))))))))).)).	4254	4283	1	-26.2	0	2.111124e-05	0.5	0	0	-6.82535	18	29	10	3UTR		0	0
hsa-miR-193b-3p	NM_001354751	ZBTB16	AACTGGCCCTCAAAGTCCCGCT#GCTGGGCCATTGAGGTTTGAGGGCCTGTG#.((.((((((((((((((.((.#)).))))........)))))))))).)).	3875	3904	1	-26.2	0	2.111124e-05	0.5	0	0	-6.82535	18	29	10	3UTR		0	0
hsa-miR-193b-3p	NM_001354752	ZBTB16	AACTGGCCCTCAAAGTCCCGCT#GCTGGGCCATTGAGGTTTGAGGGCCTGTG#.((.((((((((((((((.((.#)).))))........)))))))))).)).	3735	3764	1	-26.2	0	2.111124e-05	0.5	0	0	-6.82535	18	29	10	3UTR		0	0
hsa-miR-193b-3p	NM_001354828	PPARGC1A	AACTGGCCCTCAAAGTCCCGCT#GGCTTCTCAGCCGGGTCTTAGAAAGTTCATGTGAGGACTTGGCCAGTTA#((((((((....(((((((((.#.))).)))))))))))))).	1904	1953	1	-24.8	1	3.848927e-06	0.559	0.9180166599999999	0.30001996124999997	-12.408	17	20	14	3UTR		1	0
hsa-miR-193b-3p	NM_001355256	BRD3OS	AACTGGCCCTCAAAGTCCCGCT#GTGGGCTGTCAGGGTCAGTG#.(((((((((...((.(((((.#)))))))...))))))))).	5228	5248	1	-26.6	1	0.000369406	0.412	-0.476412	-0.369408	-11.4871	16	20	9	3UTR		0	0
hsa-miR-193b-3p	NM_001358406	CCDC163	AACTGGCCCTCAAAGTCCCGCT#GGTGGGACTTGGATCTGGACAGTA#.((((.((.((.((((((((((#)))))))))).))...)).)))).	1478	1502	1	-23.5	0	0.000407027	0.5	1.50476	0.9822359950000001	-10.0975	18	24	10	3UTR		0	0
hsa-miR-193b-3p	NM_001358406	CCDC163	AACTGGCCCTCAAAGTCCCGCT#AGATGGGGTTTCACCATGTTGGCCAGTC#.(((((((..((((((((((((#)).)))))))).....))..))))))).	1227	1255	1	-19.4	1	0.00583886	0.559	0.3989485150000001	0.662215	-6.09222	19	28	8	3UTR		0	0
hsa-miR-193b-3p	NM_001358418	FAM90A26	AACTGGCCCTCAAAGTCCCGCT#GTGGGACTGAGGAGCTCAGA#..(((((((((..((((((((.#)))))))))))).)).))).	1984	2004	1	-26.5	1	1.573119e-05	0.397	0	0	-9.59293	17	20	12	3UTR		0	0
hsa-miR-193b-3p	NM_001358661	C17orf113	AACTGGCCCTCAAAGTCCCGCT#AGAGGGGCGAGGGCTAGC#..(((((((((...(((((.((#)).)))))))))))))).	3654	3672	1	-25.8	1	3.416844e-05	0.485	1.5142101111111108	1.18247	-10.4498	16	18	14	3UTR		0	0
hsa-miR-193b-3p	NM_001362758	CD40	AACTGGCCCTCAAAGTCCCGCT#AGAAGGGTCTGGGGGAGGGTTGGTTA#(((((((((((..((.(((.((#))..))).))....))))))))))).	1549	1575	1	-22.2	1	0.0448547	0.471	0	0	-8.80656	18	26	11	3UTR		0	0
hsa-miR-193b-3p	NM_001362848	NAGA	AACTGGCCCTCAAAGTCCCGCT#GGCTTTGTGGGAAATGAGTTGAGACCATGGACTTGGGAGTTGGGGGCCAGA#..(((((((((((..(((((..#.))))).))))))))))).	2915	2966	1	-29.1	1	0.000465596	0.5	0	0	-6.54929	16	19	11	3UTR	MIRT016604	0	1
hsa-miR-193b-3p	NM_001362850	NAGA	AACTGGCCCTCAAAGTCCCGCT#GGCTTTGTGGGAAATGAGTTGAGACCATGGACTTGGGAGTTGGGGGCCAGA#..(((((((((((..(((((..#.))))).))))))))))).	2908	2959	1	-29.1	1	0.000465596	0.5	0	0	-6.54929	16	19	11	3UTR	MIRT016604	0	1
hsa-miR-193b-3p	NM_001362930	GDAP1	AACTGGCCCTCAAAGTCCCGCT#GGGATAGTGGGCTGGA#..(((((((.(...(((((...#))))).).))))))).	1371	1387	1	-20.1	1	3.321748e-05	0.515	0	0	-11.6923	13	16	7	3UTR		0	0
hsa-miR-193b-3p	NM_001363010	AZIN1	AACTGGCCCTCAAAGTCCCGCT#AGTTGGGATGGGGGTTGGG#..((((((((((...(((((((#))).)))))))))))))).	3036	3055	1	-21.1	1	0.0236812	0.559	0	0	-7.83842	17	19	14	3UTR		0	0
hsa-miR-193b-3p	NM_001363010	AZIN1	AACTGGCCCTCAAAGTCCCGCT#GGCTAAAACTTTGGGAAAGGGGCTAGC#..((((((((.....(((((..#.)))))..)))))))).	2546	2573	1	-20.4	1	7.502763e-05	0.618	0	0	-14.01	13	17	8	3UTR		0	0
hsa-miR-193b-3p	NM_001363012	AZIN1	AACTGGCCCTCAAAGTCCCGCT#AGTTGGGATGGGGGTTGGG#..((((((((((...(((((((#))).)))))))))))))).	3194	3213	1	-21.1	1	0.0236812	0.559	0	0	-7.83842	17	19	14	3UTR		0	0
hsa-miR-193b-3p	NM_001363012	AZIN1	AACTGGCCCTCAAAGTCCCGCT#GGCTAAAACTTTGGGAAAGGGGCTAGC#..((((((((.....(((((..#.)))))..)))))))).	2704	2731	1	-20.4	1	7.502763e-05	0.618	0	0	-14.01	13	17	8	3UTR		0	0
hsa-miR-193b-3p	NM_001363024	AZIN1	AACTGGCCCTCAAAGTCCCGCT#AGTTGGGATGGGGGTTGGG#..((((((((((...(((((((#))).)))))))))))))).	3197	3216	1	-21.1	1	0.0236812	0.559	0	0	-7.83842	17	19	14	3UTR		0	0
hsa-miR-193b-3p	NM_001363024	AZIN1	AACTGGCCCTCAAAGTCCCGCT#GGCTAAAACTTTGGGAAAGGGGCTAGC#..((((((((.....(((((..#.)))))..)))))))).	2707	2734	1	-20.4	1	7.502763e-05	0.618	0	0	-14.01	13	17	8	3UTR		0	0
hsa-miR-193b-3p	NM_001363462	TMEM120A	AACTGGCCCTCAAAGTCCCGCT#AGCGTGTGTGTTCTCCTGGGGGAGGGGAGGGCTGGG#..(((((((((....((((.(.#.).))))...))))))))).	1287	1323	1	-26.7	1	9.406474e-06	0.324	0	0	-11.1852	14	20	9	3UTR		0	0
hsa-miR-193b-3p	NM_001363466	FAM126A	AACTGGCCCTCAAAGTCCCGCT#AGCTGGGCTTTGGCTAGTG#.(((((((...(((((((.(((#))).)))))))))))))).	12657	12676	1	-22.6	1	0.000215644	0.529	0	0	-8.917	17	19	14	3UTR		0	0
hsa-miR-193b-3p	NM_001363466	FAM126A	AACTGGCCCTCAAAGTCCCGCT#GTGGGGCTGGGACAGA#..(((.(((....((((((((.#))))))))))).))).	1944	1960	1	-21	0	0.0016626	0.471	0	0	-15.5612	14	16	11	3UTR		0	0
hsa-miR-193b-3p	NM_001363482	BCAP29	AACTGGCCCTCAAAGTCCCGCT#GGACTGTCATGTGGGGCCAGTTT#((((((((((...(((((....#))))).......)))))))))).	2141	2164	1	-23.7	1	0.000110992	0.574	0	0	-11.3983	15	23	10	3UTR		0	0
hsa-miR-193b-3p	NM_001363486	MEPCE	AACTGGCCCTCAAAGTCCCGCT#AGAGGGACTGAGGGTTAGA#..(((((((((..((((((.((#)).))))))))))))))).	1538	1557	1	-25.9	1	0.0143657	0.412	0	0	-9.59293	17	19	15	3UTR	MIRT041225	0	0
hsa-miR-193b-3p	NM_001363517	ZNF746	AACTGGCCCTCAAAGTCCCGCT#GGCTGGGTTTGGGGGCCAAGTG#.(((((((((((((..((((((#))).)))))))))))))).)).	3495	3517	1	-26.8	1	2.305676e-06	0.441	0	0	-4.76182	19	22	14	3UTR		0	0
hsa-miR-193b-3p	NM_001363520	MFSD8	AACTGGCCCTCAAAGTCCCGCT#GGCCAAGGCAGGAGGATTGCTTGAGGCCAGG#..((((.(((((((((((..((#.))..)))))..)))))))))).	2730	2761	1	-21.6	0	3.876281e-06	0.471	0	0	-6.50069	17	23	10	3UTR		0	0
hsa-miR-193b-3p	NM_001363521	MFSD8	AACTGGCCCTCAAAGTCCCGCT#GGCCAAGGCAGGAGGATTGCTTGAGGCCAGG#..((((.(((((((((((..((#.))..)))))..)))))))))).	2616	2647	1	-21.6	0	3.876281e-06	0.471	0	0	-6.50069	17	23	10	3UTR		0	0
hsa-miR-193b-3p	NM_001363545	PFKFB3	AACTGGCCCTCAAAGTCCCGCT#GTGGGATTTCCCAGGTCAGTG#.(((((((....(((((((((.#)))))))))....))))))).	2111	2132	1	-24.2	1	0.00741016	0.544	0	0	-12.2638	16	21	9	3UTR		0	0
hsa-miR-193b-3p	NM_001363550	ZNF808	AACTGGCCCTCAAAGTCCCGCT#AGCCTTAATTGACATTCAAGTGTTTATGTTAAGAGGATGGGGCCAGG#..((((((((....((((....#.)))))))))))).	3157	3204	1	-20.6	1	0.00125977	0.5	0	0	-13.2745	12	14	12	3UTR		0	0
hsa-miR-193b-3p	NM_001363551	PLA2G15	AACTGGCCCTCAAAGTCCCGCT#GGCAGGACACAGAAGGGCTGGTG#.((((((((((...((((.(((#))).))))...)).)))))))).	860	883	1	-23.7	1	3.054105e-05	0.353	0	0	-9.2861	17	23	8	3UTR		0	0
hsa-miR-193b-3p	NM_001363590	TATDN3	AACTGGCCCTCAAAGTCCCGCT#AGATTTTTGACTTATGAGGCCAGTG#.(((((.((((((((((.....#.))))).)))))))))).	1577	1602	1	-21.2	0	6.56722e-05	0.676	0	0	-5.33701	15	18	10	3UTR		0	0
hsa-miR-193b-3p	NM_001363652	NPR3	AACTGGCCCTCAAAGTCCCGCT#TGGGTAGGGGGGCCAGG#..(((((((((.....((((..#))))...))))))))).	3929	3946	1	-24.5	1	0.000440352	0.529	0	0	-11.4183	13	17	9	3UTR		0	0
hsa-miR-193b-3p	NM_001363667	KIRREL2	AACTGGCCCTCAAAGTCCCGCT#GGCAGTGGGTGTTGGGAGTTTGGGGCCGGG#..(((((((.((((.(((((..#.))))).))))))))))).	2510	2540	1	-29	1	0.00100696	0.441	0	0	-6.93496	16	19	11	3UTR		0	0
hsa-miR-193b-3p	NM_001363671	AP4M1	AACTGGCCCTCAAAGTCCCGCT#GTGGGAATCCGGGGGCTGGC#..(((((((((....((((((.#))))))....))))))))).	1788	1808	1	-26.4	1	8.080635e-05	0.382	0	0	-11.1852	15	20	9	3UTR		0	0
hsa-miR-193b-3p	NM_001363679	MFSD10	AACTGGCCCTCAAAGTCCCGCT#AGTCCAGGGAGACCCTGTGGGTGGGGGCCGGC#..((((((((((....(((((.#.))))))))))))))).	1425	1457	1	-27.1	1	1.119941e-08	0.279	0	0	-8.07147	15	17	15	3UTR		0	0
hsa-miR-193b-3p	NM_001363681	NFATC4	AACTGGCCCTCAAAGTCCCGCT#GGCATGAGGGGGCTCAGAGGCTCCTTGACTGGGACCAGGATTGGGGGCCAGG#..(((((((((((.((((((..#.)))))).....))))))))))).	3484	3536	1	-29.3	1	4.031354e-07	0.382	0	0	-5.81384	17	24	11	3UTR		0	1
hsa-miR-193b-3p	NM_001363682	NFATC4	AACTGGCCCTCAAAGTCCCGCT#GGCATGAGGGGGCTCAGAGGCTCCTTGACTGGGACCAGGATTGGGGGCCAGG#..(((((((((((.((((((..#.)))))).....))))))))))).	3160	3212	1	-29.3	1	4.031354e-07	0.382	0	0	-5.81384	17	24	11	3UTR		0	1
hsa-miR-193b-3p	NM_001363730	DAPK2	AACTGGCCCTCAAAGTCCCGCT#GGTGGGGCTGAGCCAAGATTGGGGTTAGG#..(((((((.((((((((((((#))))))))).........)))))))))).	6682	6711	1	-25.1	1	0.000407458	0.485	0	0	-6.19951	19	29	10	3UTR		0	0
hsa-miR-193b-3p	NM_001363734	ASXL1	AACTGGCCCTCAAAGTCCCGCT#TGGGGAGTTGATGGCCAGG#..((((((.((((..(((((..#)))))..)))).)))))).	5112	5131	1	-23.3	1	0.000955911	0.544	0	0	-7.60568	15	19	6	3UTR	MIRT041588	0	0
hsa-miR-193b-3p	NM_001363735	TMED3	AACTGGCCCTCAAAGTCCCGCT#AGCCCCTCCTTCCCTTTCATATGCAGGCTGGGGGCTTCCTGAGGGCTAGG#..((((((((((((((((((((#.)))..)))))))..)))))))))).	860	910	1	-31.6	1	0.000129838	0.5	0	0	-4.957	20	26	10	3UTR		0	0
hsa-miR-193b-3p	NM_001363748	EPHA4	AACTGGCCCTCAAAGTCCCGCT#GTGGGGCTTACAGAAATGACTGCCGGTC#.((((((..((((((((((((.#))))))))).......)))..)))))).	3211	3239	1	-24.2	1	1.153992e-05	0.559	0	0	-7.16335	18	28	9	3UTR		0	0
hsa-miR-193b-3p	NM_001363756	ECPAS	AACTGGCCCTCAAAGTCCCGCT#AGTGAGCTTAATGGAACCTTGGATGTTTGAGGGGTGGTTG#(((((.((((((((((((....#.)))).)))))))).))))).	5963	6003	1	-22.1	0	0.00165097	0.588	0	0	-5.83853	17	21	8	3UTR		0	0
hsa-miR-193b-3p	NM_001363810	VMA21	AACTGGCCCTCAAAGTCCCGCT#GCTGGAGGGGGCCAT#...((((((((....(((.((.#)).))))))))))).	767	782	1	-20.9	0	0.00749824	0.691	0	0	-12.7428	13	15	11	3UTR		0	0
hsa-miR-193b-3p	NM_001363818	MTX3	AACTGGCCCTCAAAGTCCCGCT#AGTGGGAATTTGAGGTGTTTGTA#.((.((((((((((.(((((((#))))))).))))))).))).)).	7533	7556	1	-24.3	0	0.0795731	0.662	0	0	-7.5608	19	23	7	3UTR		0	0
hsa-miR-193b-3p	NM_001363825	POLR2F	AACTGGCCCTCAAAGTCCCGCT#GGCGGGGGATGGAGGGGAGGG#..((..(((((....(((((((#)))))))....)))))..)).	836	857	1	-24.6	0	0.178646	0.368	0	0	-17.2052	14	21	7	3UTR		0	0
hsa-miR-193b-3p	NM_001363826	KIAA0100	AACTGGCCCTCAAAGTCCCGCT#GGCTCCAGGGACTTGTGGGGTGGGA#..((.(((((..(((((((...#.)))))))..))))).)).	6708	6733	1	-24.3	0	0.000118259	0.397	0	0	-15.2476	14	19	7	3UTR		0	0
hsa-miR-193b-3p	NM_001363830	SLFN12L	AACTGGCCCTCAAAGTCCCGCT#TGGGCTTTGGGGCCTAGG#..(((((((.(((((.((((..#)))))))))))))).)).	7626	7644	1	-24.3	1	3.79438e-07	0.5	0	0	-6.43256	16	18	14	3UTR		0	0
hsa-miR-193b-3p	NM_001363830	SLFN12L	AACTGGCCCTCAAAGTCCCGCT#GGCGGATCACTTGAGGCCAGG#..((((.((((.((((.(((((#)))))...)))))))))))).	12347	12368	1	-23.6	0	0.000359272	0.412	0	0	-9.84749	17	21	12	3UTR		0	0
hsa-miR-193b-3p	NM_001363908	IRF8	AACTGGCCCTCAAAGTCCCGCT#TGGGGCTTTGTTGCCAGG#..(((((...((((((((((..#))))))))))..))))).	1833	1851	1	-24.1	0	7.146571e-06	0.647	0	0	-9.56953	15	18	10	3UTR		0	0
hsa-miR-193b-3p	NM_001363913	MAP2	AACTGGCCCTCAAAGTCCCGCT#GTGGGGGTGGGTCCAGTTA#(((((((((....(.((((((.#)))))).)))).)))))).	2778	2797	1	-22.7	1	0.00044086	0.559	0	0	-13.3762	16	19	6	3UTR		0	0
hsa-miR-193b-3p	NM_001363923	CMTM3	AACTGGCCCTCAAAGTCCCGCT#GGCGGGGGTCGGGGGTCT#....(((((((..(.(((((((#))))))).).))))))).	1463	1481	1	-24.5	0	0.00100654	0.456	0	0	-14.9179	15	18	7	3UTR		0	0
hsa-miR-193b-3p	NM_001364008	NOTCH2NLB	AACTGGCCCTCAAAGTCCCGCT#AGTGGGAGATACGTGGCACAGGGGTCAGTG#.(((((((((((...(((((((#)))))))......)).....))))))))).	5679	5709	1	-23.9	1	0.000298528	0.471	0.5939065687500001	0.259101	-6.67474	18	30	9	3UTR		0	0
hsa-miR-193b-3p	NM_001364008	NOTCH2NLB	AACTGGCCCTCAAAGTCCCGCT#GGGAGCTTGGGGCCTGGTG#.((((((((.(((..((((...#))))..)))))))).))).	1448	1467	1	-24	1	0.000475157	0.456	1.2060024444444446	0.643877	-6.62812	15	19	8	3UTR		0	0
hsa-miR-193b-3p	NM_001364012	NOTCH2NLC	AACTGGCCCTCAAAGTCCCGCT#AGTGGGAGATACGTGGCACAGGGGTCAGTG#.(((((((((((...(((((((#)))))))......)).....))))))))).	5707	5737	1	-23.9	1	0.0002612	0.471	0	0	-6.67474	18	30	9	3UTR		0	0
hsa-miR-193b-3p	NM_001364012	NOTCH2NLC	AACTGGCCCTCAAAGTCCCGCT#GGGAGCTTGGGGCCTGGTG#.((((((((.(((..((((...#))))..)))))))).))).	1473	1492	1	-24	1	0.000363512	0.456	0	0	-6.62812	15	19	8	3UTR		0	0
hsa-miR-193b-3p	NM_001364013	NOTCH2NLC	AACTGGCCCTCAAAGTCCCGCT#AGTGGGAGATACGTGGCACAGGGGTCAGTG#.(((((((((((...(((((((#)))))))......)).....))))))))).	5699	5729	1	-23.9	1	0.0002612	0.471	0	0	-6.67474	18	30	9	3UTR		0	0
hsa-miR-193b-3p	NM_001364013	NOTCH2NLC	AACTGGCCCTCAAAGTCCCGCT#GGGAGCTTGGGGCCTGGTG#.((((((((.(((..((((...#))))..)))))))).))).	1465	1484	1	-24	1	0.000363512	0.456	0	0	-6.62812	15	19	8	3UTR		0	0
hsa-miR-193b-3p	NM_001364085	VDR	AACTGGCCCTCAAAGTCCCGCT#GGTGGGGTCTTTGTGAGAGTGAGCTGTAGGTGTGCGGGACCGGTA#.((((((((.((((((((((((#))))))).)))))......................))).))))).	2686	2731	1	-23.5	1	9.431502e-05	0.456	0	0	-5.03583	20	45	7	3UTR		0	0
hsa-miR-193b-3p	NM_001364127	CLTB	AACTGGCCCTCAAAGTCCCGCT#CGGGGCTTTGCCTGCCAGC#..(((((...((((((((((..#))))))))))...))))).	1082	1101	1	-25.3	0	2.286253e-05	0.412	0	0	-9.56953	15	19	10	3UTR		0	0
hsa-miR-193b-3p	NM_001364128	CTNND2	AACTGGCCCTCAAAGTCCCGCT#GGTGGGGCGTAAGGGTTAT#...(((((((....((((((((#))))))))...))))))).	3490	3509	1	-22.6	0	0.000257745	0.485	1.8456971374999998	2.57346	-14.8321	15	19	8	3UTR		0	0
hsa-miR-193b-3p	NM_001364303	OXCT1	AACTGGCCCTCAAAGTCCCGCT#GTGGGGGAGGGCAGGG#..((.((((((....((((((.#)))))))))))).)).	1637	1653	1	-22	0	4.246024e-05	0.515	0	0	-15.3043	14	16	12	3UTR		0	0
hsa-miR-193b-3p	NM_001364582	PAM	AACTGGCCCTCAAAGTCCCGCT#GGCAGGTACAGTGGCTCAAGCCTATACTTCCAGGACTTTGGGAGGCCAA#...(((((((((((((((....#.)))))))))).))))).	4298	4347	1	-26.5	0	1.300125e-05	0.456	0	0	-6.51454	15	18	10	3UTR		0	0
hsa-miR-193b-3p	NM_001364583	PAM	AACTGGCCCTCAAAGTCCCGCT#GGCAGGTACAGTGGCTCAAGCCTATACTTCCAGGACTTTGGGAGGCCAA#...(((((((((((((((....#.)))))))))).))))).	4362	4411	1	-26.5	0	1.300125e-05	0.456	0	0	-6.51454	15	18	10	3UTR		0	0
hsa-miR-193b-3p	NM_001364586	PAM	AACTGGCCCTCAAAGTCCCGCT#GGCAGGTACAGTGGCTCAAGCCTATACTTCCAGGACTTTGGGAGGCCAA#...(((((((((((((((....#.)))))))))).))))).	4044	4093	1	-26.5	0	1.300125e-05	0.456	0	0	-6.51454	15	18	10	3UTR		0	0
hsa-miR-193b-3p	NM_001364590	PAM	AACTGGCCCTCAAAGTCCCGCT#GGCAGGTACAGTGGCTCAAGCCTATACTTCCAGGACTTTGGGAGGCCAA#...(((((((((((((((....#.)))))))))).))))).	4228	4277	1	-26.5	0	1.300125e-05	0.456	0	0	-6.51454	15	18	10	3UTR		0	0
hsa-miR-193b-3p	NM_001364594	PAM	AACTGGCCCTCAAAGTCCCGCT#GGCAGGTACAGTGGCTCAAGCCTATACTTCCAGGACTTTGGGAGGCCAA#...(((((((((((((((....#.)))))))))).))))).	3837	3886	1	-26.5	0	1.300125e-05	0.456	0	0	-6.51454	15	18	10	3UTR		0	0
hsa-miR-193b-3p	NM_001364677	MDFIC2	AACTGGCCCTCAAAGTCCCGCT#AGCGTTGAGGGTA#.....((((((((.....((((#)))))))))))).	1553	1566	1	-16	0	0.012297	0.647	0	0	-15.4909	12	13	12	3UTR		0	0
hsa-miR-193b-3p	NM_001364841	NKX6-3	AACTGGCCCTCAAAGTCCCGCT#GGTGGGCTGGGGGAGGCGGGTGAGGGCTGGTC#.(((((((((((....((((((#.))))))))))))))))).	2267	2299	1	-29	1	1.432502e-06	0.338	0	0	-6.90779	17	19	17	3UTR		0	0
hsa-miR-193b-3p	NM_001364929	ECPAS	AACTGGCCCTCAAAGTCCCGCT#AGTGAGCTTAATGGAACCTTGGATGTTTGAGGGGTGGTTG#(((((.((((((((((((....#.)))).)))))))).))))).	6067	6107	1	-22.1	0	0.00165097	0.588	0	0	-5.83853	17	21	8	3UTR		0	0
hsa-miR-193b-3p	NM_001365045	ADAR	AACTGGCCCTCAAAGTCCCGCT#GGGACTTTGTTGGCTT#....((((..(((((((((...#)))))))))..)))).	5172	5188	1	-23.4	0	0.000132137	0.574	0	0	-11.8455	13	16	9	3UTR		0	0
hsa-miR-193b-3p	NM_001365046	ADAR	AACTGGCCCTCAAAGTCCCGCT#GGGACTTTGTTGGCTT#....((((..(((((((((...#)))))))))..)))).	5036	5052	1	-23.4	0	0.000132137	0.574	0	0	-11.8455	13	16	9	3UTR		0	0
hsa-miR-193b-3p	NM_001365048	ADAR	AACTGGCCCTCAAAGTCCCGCT#GGGACTTTGTTGGCTT#....((((..(((((((((...#)))))))))..)))).	5175	5191	1	-23.4	0	0.000132137	0.574	0	0	-11.8455	13	16	9	3UTR		0	0
hsa-miR-193b-3p	NM_001365201	MEF2A	AACTGGCCCTCAAAGTCCCGCT#AGCTGGACTTTGTTGCCAT#...((((...((((((((.(((#))).))))))))..)))).	5392	5411	1	-21.1	0	0.00226609	0.603	0	0	-11.1271	15	19	8	3UTR		0	0
hsa-miR-193b-3p	NM_001365202	MEF2A	AACTGGCCCTCAAAGTCCCGCT#AGCTGGACTTTGTTGCCAT#...((((...((((((((.(((#))).))))))))..)))).	5310	5329	1	-21.1	0	0.00226609	0.603	3.09954	3.9134	-11.1271	15	19	8	3UTR		0	0
hsa-miR-193b-3p	NM_001365208	MEF2A	AACTGGCCCTCAAAGTCCCGCT#AGCTGGACTTTGTTGCCAT#...((((...((((((((.(((#))).))))))))..)))).	5350	5369	1	-21.1	0	0.00226609	0.603	0	0	-11.1271	15	19	8	3UTR		0	0
hsa-miR-193b-3p	NM_001365371	GOLGA6L7	AACTGGCCCTCAAAGTCCCGCT#GTGGGAGGTTGAGGTTGCAGTG#.((((..((((((..((((((.#))))))..))))))...)))).	2154	2176	1	-24.1	0	9.529823e-05	0.426	0	0	-8.83026	16	22	6	3UTR		0	0
hsa-miR-193b-3p	NM_001365455	C13orf46	AACTGGCCCTCAAAGTCCCGCT#GTGGAGACACATGGGGGCCGT#...(((((((((..(((((((.#)))).)))...))))))))).	3291	3312	1	-25.8	0	6.779042e-08	0.426	0	0	-8.66051	16	21	9	3UTR		0	0
hsa-miR-193b-3p	NM_001365479	USP40	AACTGGCCCTCAAAGTCCCGCT#GTGGGAGGTGTGTGGGGTCAGG#..((((((((((...((((((.#))))))....)).)))))))).	4186	4208	1	-26	1	0.00846706	0.382	0	0	-7.83842	16	22	8	3UTR		0	0
hsa-miR-193b-3p	NM_001365672	COBLL1	AACTGGCCCTCAAAGTCCCGCT#GGATTTAGGGGGCTATGTA#.((((((((((.((((((....#)))))).)))))))).)).	6017	6036	1	-21.8	1	0.000198482	0.691	0	0	-7.14013	16	19	8	3UTR		0	0
hsa-miR-193b-3p	NM_001365701	LRGUK	AACTGGCCCTCAAAGTCCCGCT#AGAGAGACTGGGGGCCAGTTG#(((((((((((..((((.(.((#)).).))))))))))))))).	5054	5075	1	-25.1	1	5.054175e-07	0.471	0	0	-8.57351	18	21	15	3UTR		0	0
hsa-miR-193b-3p	NM_001365809	SYT7	AACTGGCCCTCAAAGTCCCGCT#AGCGGTGGGCCGAGGGCCGGG#..(((((((((...((((((((#)))))..))).))))))))).	4714	4735	1	-28.4	1	1.601141e-06	0.338	0	0	-10.4498	17	21	9	3UTR		0	0
hsa-miR-193b-3p	NM_001365838	KCNN3	AACTGGCCCTCAAAGTCCCGCT#GCGGGGGGTGGGGGTCAGA#..((((((((((...((((((.#))))))..)))))))))).	1693	1712	1	-29.3	1	1.1137e-05	0.397	0	0	-7.83842	16	19	10	3UTR		0	0
hsa-miR-193b-3p	NM_001365848	POU2F1	AACTGGCCCTCAAAGTCCCGCT#GGGACCCTGAGGGTG#.....(((((((..(((((...#)))))..))))))).	9099	9114	1	-23	0	5.350612e-07	0.471	0	0	-15.8116	12	15	7	3UTR		0	0
hsa-miR-193b-3p	NM_001365892	CCDC188	AACTGGCCCTCAAAGTCCCGCT#GGTGGGGTCTGTCCTGAGGGCTGGG#..((((((((((.(((((((((#))))))).))....)))))))))).	1410	1435	1	-27.2	1	1.466973e-05	0.426	0	0	-6.24613	19	25	10	3UTR		0	0
hsa-miR-193b-3p	NM_001365951	KIF1B	AACTGGCCCTCAAAGTCCCGCT#AGCGCTCAGGCCAGGACTGTGCAGGGCCAGC#..((((((((((.(((((.(((#.)))..))))).)).)))))))).	9077	9108	1	-28.4	1	0.000170136	0.338	0	0	-6.24613	18	24	8	3UTR	MIRT016600	0	0
hsa-miR-193b-3p	NM_001365952	KIF1B	AACTGGCCCTCAAAGTCCCGCT#AGCGCTCAGGCCAGGACTGTGCAGGGCCAGC#..((((((((((.(((((.(((#.)))..))))).)).)))))))).	8891	8922	1	-28.4	1	0.000170136	0.338	0	0	-6.24613	18	24	8	3UTR	MIRT016600	0	0
hsa-miR-193b-3p	NM_001366022	TET3	AACTGGCCCTCAAAGTCCCGCT#GGCGGGTTGGGGGTGCAGA#..(((((((((((...((((((#)))))))))))))).))).	5272	5291	1	-24.9	1	6.992446e-05	0.544	0	0	-6.78234	17	19	14	3UTR	MIRT726340	0	0
hsa-miR-193b-3p	NM_001366078	CALHM4	AACTGGCCCTCAAAGTCCCGCT#AGTATTTTGGGGGGGGGGGGGGCTAT#...((((((((....((((.((#.)).))))..)))))))).	3419	3445	1	-22.9	0	0.000319578	0.559	0	0	-12.7428	14	19	8	3UTR		0	0
hsa-miR-193b-3p	NM_001366244	GOLGA2	AACTGGCCCTCAAAGTCCCGCT#AGTGGGGCTAACTGTAGACCAGGCGAGGGCACGGG#..(((((((((..(((((((((#)))))))))...............)))))).))).	4055	4090	1	-26.4	1	3.691165e-05	0.324	0.17423537777777776	0.829364	-9.59293	18	35	9	3UTR		0	0
hsa-miR-193b-3p	NM_001366246	GOLGA2	AACTGGCCCTCAAAGTCCCGCT#AGTGGGGCTAACTGTAGACCAGGCGAGGGCACGGG#..(((((((((..(((((((((#)))))))))...............)))))).))).	3974	4009	1	-26.4	1	3.691165e-05	0.324	0.5501494222222223	0.5919023625000002	-9.59293	18	35	9	3UTR		0	0
hsa-miR-193b-3p	NM_001366280	SRGAP2B	AACTGGCCCTCAAAGTCCCGCT#GTGGGAGCCTGAGGCGGGTGGGTCTCTTGAGGCCAGG#..((((.((((((((.((((((#.)))))).)).)))))))))).	5020	5057	1	-27.7	0	5.722738e-06	0.382	0	0	-6.73374	18	22	10	3UTR		0	0
hsa-miR-193b-3p	NM_001366305	KPNA5	AACTGGCCCTCAAAGTCCCGCT#GTGGGGTTGGGGGAGGGG#..((..(((((((..((((((.#)))))))))))))..)).	10323	10341	1	-21.5	0	0.0817541	0.456	0	0	-12.5693	15	18	13	3UTR		0	0
hsa-miR-193b-3p	NM_001366305	KPNA5	AACTGGCCCTCAAAGTCCCGCT#GGTGGGACTGTAAACTAGTTCAAGCATTGTGGAAGTCAGTTT#(((((((((.((((((((((((#))))))))).................))).))..))))))).	9872	9914	1	-22.7	1	0.00125755	0.574	0	0	-5.18008	21	42	9	3UTR		0	0
hsa-miR-193b-3p	NM_001366306	KPNA5	AACTGGCCCTCAAAGTCCCGCT#GTGGGGTTGGGGGAGGGG#..((..(((((((..((((((.#)))))))))))))..)).	10263	10281	1	-21.5	0	0.0817541	0.456	0	0	-12.5693	15	18	13	3UTR		0	0
hsa-miR-193b-3p	NM_001366306	KPNA5	AACTGGCCCTCAAAGTCCCGCT#GGTGGGACTGTAAACTAGTTCAAGCATTGTGGAAGTCAGTTT#(((((((((.((((((((((((#))))))))).................))).))..))))))).	9812	9854	1	-22.7	1	0.00125755	0.574	0	0	-5.18008	21	42	9	3UTR		0	0
hsa-miR-193b-3p	NM_001366307	KPNA5	AACTGGCCCTCAAAGTCCCGCT#GTGGGGTTGGGGGAGGGG#..((..(((((((..((((((.#)))))))))))))..)).	10369	10387	1	-21.5	0	0.0817541	0.456	0.05718108571428571	0.02051211500000001	-12.5693	15	18	13	3UTR		0	0
hsa-miR-193b-3p	NM_001366307	KPNA5	AACTGGCCCTCAAAGTCCCGCT#GGTGGGACTGTAAACTAGTTCAAGCATTGTGGAAGTCAGTTT#(((((((((.((((((((((((#))))))))).................))).))..))))))).	9918	9960	1	-22.7	1	0.00125755	0.574	0.0025921793103448544	0.050934030000000026	-5.18008	21	42	9	3UTR		0	0
hsa-miR-193b-3p	NM_001366335	CCDC14	AACTGGCCCTCAAAGTCCCGCT#AGCGTTTGAAGGAGCCAGC#..((((((((((((....((((#))))))))).)).))))).	3896	3915	1	-18.6	1	0.000238795	0.603	0	0	-5.9255	16	19	9	3UTR		0	0
hsa-miR-193b-3p	NM_001366385	CARD14	AACTGGCCCTCAAAGTCCCGCT#GCCCCTTCCCGGGACTGTGGGGGCTT#....((((((((.(((((((..#.))))))).)))))))).	3739	3765	1	-28.2	0	2.122827e-08	0.397	0	0	-10.8357	15	18	8	3UTR		0	0
hsa-miR-193b-3p	NM_001366449	RABGAP1L	AACTGGCCCTCAAAGTCCCGCT#GTGGGACTCTCCGAGCCAGG#..(((((.(....((((((((.#))))))))....).))))).	1290	1310	1	-23.5	0	0.000203768	0.412	0	0	-15.9739	14	20	8	3UTR		0	0
hsa-miR-193b-3p	NM_001366466	MECOM	AACTGGCCCTCAAAGTCCCGCT#GGTGGGTGAGAAGGGCAGTTG#(((((.((((((....((((((#))))))))))..)).))))).	4352	4373	1	-20.8	0	0.0920718	0.5	0	0	-8.953	17	21	10	3UTR		0	0
hsa-miR-193b-3p	NM_001366471	MECOM	AACTGGCCCTCAAAGTCCCGCT#GGTGGGTGAGAAGGGCAGTTG#(((((.((((((....((((((#))))))))))..)).))))).	3700	3721	1	-20.8	0	0.0920718	0.5	0	0	-8.953	17	21	10	3UTR		0	0
hsa-miR-193b-3p	NM_001366704	MAS1	AACTGGCCCTCAAAGTCCCGCT#AGTGCAGACTCCCCTGATTCCAATGAAGCTGCTGTTGAGGGCCGGA#..((((((((((((((...(((#.))).))).))))))))))).	10015	10061	1	-25.3	1	1.003734e-05	0.412	0	0	-4.957	17	21	11	3UTR		0	0
hsa-miR-193b-3p	NM_001366844	ZNF106	AACTGGCCCTCAAAGTCCCGCT#GGTGGGGGAGAGGGGGTTAGA#..(((((((((....(((((((#)))))))....))))))))).	4263	4284	1	-24.9	1	0.0500795	0.515	0	0	-11.1852	16	21	9	3UTR		0	0
hsa-miR-193b-3p	NM_001366845	ZNF106	AACTGGCCCTCAAAGTCCCGCT#GGTGGGGGAGAGGGGGTTAGA#..(((((((((....(((((((#)))))))....))))))))).	6909	6930	1	-24.9	1	0.0500795	0.515	0	0	-11.1852	16	21	9	3UTR		0	0
hsa-miR-193b-3p	NM_001366900	TTC21A	AACTGGCCCTCAAAGTCCCGCT#GGAGGGATGGAAAGTGGGTCAGTG#.((((((((.....(((((.((#)).))))).......)))))))).	4153	4177	1	-22.6	1	0.000353533	0.544	0	0	-13.3534	15	24	8	3UTR		0	0
hsa-miR-193b-3p	NM_001366935	PTAR1	AACTGGCCCTCAAAGTCCCGCT#GGTGGGATGAGGGTGGGG#..((.(((((((...(((((((#)))))))))))))).)).	2431	2449	1	-26.3	0	0.0114229	0.515	0	0	-11.9575	16	18	14	3UTR		0	0
hsa-miR-193b-3p	NM_001366935	PTAR1	AACTGGCCCTCAAAGTCCCGCT#AGCCCAGGACTTTGAGACCAACCTGGGCCAC#...(((((((((((((((.(((#)))...))))))))).........)))))).	1521	1552	1	-25.2	0	0.000280388	0.515	0	0	-6.51454	18	31	9	3UTR		0	0
hsa-miR-193b-3p	NM_001367364	GSG1	AACTGGCCCTCAAAGTCCCGCT#AGCTGCGGAACAAGGGATTTCAAAGAGGGGCCAGC#..(((((((((.(((((((...#.)))))))....))))).)))).	1213	1248	1	-24	1	0.00376405	0.456	3.5073950000000003	2.7317545237500003	-8.3038	16	23	7	3UTR		0	0
hsa-miR-193b-3p	NM_001367531	CAMK2G	AACTGGCCCTCAAAGTCCCGCT#GGACTTAGGGGGACCAGG#..(((((((((.((((((....#)))))).))))).)))).	2085	2103	1	-25.3	1	0.000267089	0.382	0	0	-8.3038	15	18	6	3UTR		0	0
hsa-miR-193b-3p	NM_001367534	CAMK2G	AACTGGCCCTCAAAGTCCCGCT#GGACTTAGGGGGACCAGG#..(((((((((.((((((....#)))))).))))).)))).	2262	2280	1	-25.3	1	0.000267089	0.382	0	0	-8.3038	15	18	6	3UTR		0	0
hsa-miR-193b-3p	NM_001367542	CAMK2G	AACTGGCCCTCAAAGTCCCGCT#GGACTTAGGGGGACCAGG#..(((((((((.((((((....#)))))).))))).)))).	2363	2381	1	-25.3	1	0.000267089	0.382	0	0	-8.3038	15	18	6	3UTR		0	0
hsa-miR-193b-3p	NM_001367808	FBXL22	AACTGGCCCTCAAAGTCCCGCT#GGGGTGACTAATGAGGGCACAC#...(((((((((.((((((.(.#).)).))))..))))))).)).	753	775	1	-23.5	0	0.00190642	0.368	0	0	-7.80367	16	22	7	3UTR		0	0
hsa-miR-193b-3p	NM_001367823	ARHGEF18	AACTGGCCCTCAAAGTCCCGCT#GGCGGGGCAGGAGCTGGTG#.(((((((((....((((((((#))))))))))).)))))).	5969	5988	1	-24.8	1	0.000135154	0.294	0	0	-12.1109	17	19	11	3UTR		0	0
hsa-miR-193b-3p	NM_001367824	ARHGEF18	AACTGGCCCTCAAAGTCCCGCT#GGCGGGGCAGGAGCTGGTG#.(((((((((....((((((((#))))))))))).)))))).	4845	4864	1	-24.8	1	0.000135154	0.294	0	0	-12.1109	17	19	11	3UTR		0	0
hsa-miR-193b-3p	NM_001367838	TPM4	AACTGGCCCTCAAAGTCCCGCT#GGTAGGGATTTTCCATCCAGAGCCAATAAAAGGACTGGTGGGGGCCGGG#..((((((((((.(((((....#.)))))..)))))))))).	1342	1391	1	-28.4	1	8.181987e-06	0.441	0	0	-6.24613	15	19	10	3UTR		0	0
hsa-miR-193b-3p	NM_001367873	SOX6	AACTGGCCCTCAAAGTCCCGCT#GGCGGGGTGGGGGCAGA#..((.(((((((...(((((((#)))))))))))))))).	7852	7869	1	-24.4	0	0.00863684	0.456	0	0	-11.9575	16	17	16	3UTR		0	0
hsa-miR-193b-3p	NM_001367979	DCDC1	AACTGGCCCTCAAAGTCCCGCT#AGCAACATGATGGGGACATGAGGTTCAGTTC#((((((.(((((..(((((...#.))))).))))).)))))).	6282	6313	1	-22.8	0	0.0104877	0.471	0	0	-7.62723	16	20	6	3UTR		0	0
hsa-miR-193b-3p	NM_001368089	LCN10	AACTGGCCCTCAAAGTCCCGCT#GGTGGGGCTGGAGGAGCAGG#..(((..((((..(((((((((#))))))))).))))..))).	1332	1352	1	-26.3	0	1.004443e-05	0.426	0	0	-13.0376	16	20	9	3UTR		0	0
hsa-miR-193b-3p	NM_001368090	LCN10	AACTGGCCCTCAAAGTCCCGCT#GGTGGGGCTGGAGGAGCAGG#..(((..((((..(((((((((#))))))))).))))..))).	1263	1283	1	-26.3	0	1.004443e-05	0.426	0	0	-13.0376	16	20	9	3UTR		0	0
hsa-miR-193b-3p	NM_001368095	TGOLN2	AACTGGCCCTCAAAGTCCCGCT#AGGGGAAGTTGAAGGCCAGTC#.(((((((.((((..((((.((#))))))..)))).))))))).	5306	5327	1	-25.1	1	0.00851471	0.471	0	0	-6.442	17	21	7	3UTR		0	0
hsa-miR-193b-3p	NM_001368095	TGOLN2	AACTGGCCCTCAAAGTCCCGCT#GGCGGGTCTGGGCTGGC#..(((((((....((.((((((#)))))).))))))))).	1578	1595	1	-23.5	1	1.841795e-05	0.412	0	0	-13.8933	15	17	9	3UTR		0	0
hsa-miR-193b-3p	NM_001368096	TGOLN2	AACTGGCCCTCAAAGTCCCGCT#AGGGGAAGTTGAAGGCCAGTC#.(((((((.((((..((((.((#))))))..)))).))))))).	5265	5286	1	-25.1	1	0.00851471	0.471	0	0	-6.442	17	21	7	3UTR		0	0
hsa-miR-193b-3p	NM_001368096	TGOLN2	AACTGGCCCTCAAAGTCCCGCT#GGCGGGTCTGGGCTGGC#..(((((((....((.((((((#)))))).))))))))).	1537	1554	1	-23.5	1	1.841795e-05	0.412	0	0	-13.8933	15	17	9	3UTR		0	0
hsa-miR-193b-3p	NM_001368123	CRISP3	AACTGGCCCTCAAAGTCCCGCT#TGGGTGAGGGCTAT#...(((((((((....((((..#))))))))))))).	2110	2124	1	-19.8	0	0.00166084	0.618	0	0	-9.62901	13	14	13	3UTR		0	0
hsa-miR-193b-3p	NM_001368263	LARS2	AACTGGCCCTCAAAGTCCCGCT#GGGAAGACAGGGGCCAGA#..((((((((.....((((...#)))).....)))))))).	4610	4628	1	-24.2	1	0.0403655	0.471	0	0	-14.01	12	18	8	3UTR		0	0
hsa-miR-193b-3p	NM_001369201	SMIM38	AACTGGCCCTCAAAGTCCCGCT#GGTGGGACCGACCAAGAGTTTGAGGTGTCCAGG#..((((((((((((((((((((#))))))))..........))))))).).)))).	2437	2470	1	-27.1	1	0.00209843	0.441	0	0	-4.957	20	33	8	3UTR		0	0
hsa-miR-193b-3p	NM_001369370	DCX	AACTGGCCCTCAAAGTCCCGCT#TGGGTTGCAGATGTCCTTGAAGAGAGTGAGGCATTGAGGGCCAA#...((((((((((.(((.((((#.)))).))).)))))))))).	4570	4614	1	-27.7	0	3.531685e-05	0.441	0	0	-7.37138	17	21	10	3UTR		0	0
hsa-miR-193b-3p	NM_001369372	DCX	AACTGGCCCTCAAAGTCCCGCT#TGGGTTGCAGATGTCCTTGAAGAGAGTGAGGCATTGAGGGCCAA#...((((((((((.(((.((((#.)))).))).)))))))))).	4482	4526	1	-27.7	0	3.531685e-05	0.441	0	0	-7.37138	17	21	10	3UTR		0	0
hsa-miR-193b-3p	NM_001369373	DCX	AACTGGCCCTCAAAGTCCCGCT#TGGGTTGCAGATGTCCTTGAAGAGAGTGAGGCATTGAGGGCCAA#...((((((((((.(((.((((#.)))).))).)))))))))).	4384	4428	1	-27.7	0	3.531685e-05	0.441	0	0	-7.37138	17	21	10	3UTR		0	0
hsa-miR-193b-3p	NM_001369406	C11orf54	AACTGGCCCTCAAAGTCCCGCT#GGTTAGGGAGTAGGGCCAGA#..((((((((...(.(((((((#)))..)))).))))))))).	3307	3327	1	-22.9	1	0.000631954	0.574	0	0	-13.1532	16	20	9	3UTR		0	0
hsa-miR-193b-3p	NM_001369406	C11orf54	AACTGGCCCTCAAAGTCCCGCT#GGCATAAGGGGACGAGGGGTGGG#..(((.(((((...(((((.((#.)))))))))))).))).	3547	3570	1	-21.2	0	0.0546781	0.456	0	0	-12.3507	15	18	12	3UTR		0	0
hsa-miR-193b-3p	NM_001369467	NFIB	AACTGGCCCTCAAAGTCCCGCT#TGAGGGCTAGA#..((((((((((..........#)))))))))).	4311	4322	1	-19.1	1	0.000193883	0.588	0	0	-8.07147	10	11	10	3UTR		0	0
hsa-miR-193b-3p	NM_001369476	NFIB	AACTGGCCCTCAAAGTCCCGCT#TGAGGGCTAGA#..((((((((((..........#)))))))))).	4222	4233	1	-19.1	1	0.000193883	0.588	0	0	-8.07147	10	11	10	3UTR		0	0
hsa-miR-193b-3p	NM_001369479	NFIB	AACTGGCCCTCAAAGTCCCGCT#TGAGGGCTAGA#..((((((((((..........#)))))))))).	3742	3753	1	-19.1	1	0.000193883	0.588	0	0	-8.07147	10	11	10	3UTR		0	0
hsa-miR-193b-3p	NM_001369483	COPS7B	AACTGGCCCTCAAAGTCCCGCT#GGTGGATCTTGAGGGGCTGGG#..((((((((..(((..(((((#)))))..)))..)))))))).	2330	2351	1	-23.4	1	0.00337735	0.485	0	0	-11.3616	16	21	8	3UTR		0	0
hsa-miR-193b-3p	NM_001369521	TRIM39	AACTGGCCCTCAAAGTCCCGCT#GGGAAGGGCCAGA#..((((((((.....((((...#)))))))))))).	2736	2749	1	-22.3	1	0.0014259	0.485	0	0	-14.01	12	13	12	3UTR		0	0
hsa-miR-193b-3p	NM_001369537	NTRK2	AACTGGCCCTCAAAGTCCCGCT#GCCATCTATTTACTTTTGGAGAGAGGGGACTTTGAGTGGGTGGGTA#.(((.((((((((((((((.((#.))))))))))))..)))).))).	7956	8002	1	-28.3	0	0.00962144	0.529	0	0	-7.91236	19	24	12	3UTR		0	0
hsa-miR-193b-3p	NM_001369538	NTRK2	AACTGGCCCTCAAAGTCCCGCT#GCCATCTATTTACTTTTGGAGAGAGGGGACTTTGAGTGGGTGGGTA#.(((.((((((((((((((.((#.))))))))))))..)))).))).	7583	7629	1	-28.3	0	0.00962144	0.529	-0.0654286	0.08151459137500004	-7.91236	19	24	12	3UTR		0	0
hsa-miR-193b-3p	XM_017014932	KCNT1	AACTGGCCCTCAAAGTCCCGCT#AGCCAAGGGCTGGGGGCCAGG#..(((((((((..(((((.(((#)))...)))))))))))))).	4074	4095	1	-27.4	1	7.948985e-09	0.324	0	0	-9.59293	17	21	14	3UTR		0	0
hsa-miR-193b-3p	XM_017015098	TSC1	AACTGGCCCTCAAAGTCCCGCT#AGCTGAGGCAGGGGGATTTGGTAGGAAGGAGCCAGTG#.((((((((((.(((((((.((#.)).))))))).).....))).)))))).	5035	5072	1	-24.8	1	0.000144938	0.5	0	0	-7.14013	19	29	7	3UTR	MIRT041346	1	1
hsa-miR-193b-3p	XM_017015706	ADK	AACTGGCCCTCAAAGTCCCGCT#GGCATGGTGGCTCATGCCTGCAATCCCAATAGGGATTGGTGAGGGTCAGG#..((((((((((.((((((...#.))))))..)))))))))).	5246	5296	1	-28.7	1	3.564204e-06	0.471	0	0	-6.24613	16	20	10	3UTR		0	0
hsa-miR-193b-3p	XM_017016222	KCNMA1	AACTGGCCCTCAAAGTCCCGCT#AGATGGGACTTAATGGGCCAT#...((((((...((((((((((#)).))))))))...)))))).	8902	8923	1	-25.4	0	0.00119637	0.603	0	0	-13.9286	16	21	8	3UTR		0	0
hsa-miR-193b-3p	XM_017016498	HPSE2	AACTGGCCCTCAAAGTCCCGCT#GGCGGGGCGGGGGGTAGG#..(((.(((((...((((((((#))))))))))))).))).	3045	3063	1	-27	0	0.0399571	0.515	0	0	-12.3507	16	18	13	3UTR		0	0
hsa-miR-193b-3p	XM_017016498	HPSE2	AACTGGCCCTCAAAGTCCCGCT#GGGGCATGAGGGTCT#....((((((((..(((((...#))))).)))))))).	2402	2417	1	-23.6	0	0.00027724	0.559	0	0	-11.6925	13	15	8	3UTR		0	0
hsa-miR-193b-3p	XM_017017391	KDM2A	AACTGGCCCTCAAAGTCCCGCT#CGGGCTCTGAGGCCAGC#..((((.(((((.((.((((..#)))))).))))))))).	3735	3752	1	-23.2	0	2.500843e-06	0.338	0	0	-8.02287	15	17	9	3UTR		0	0
hsa-miR-193b-3p	XM_017017632	SLC29A2	AACTGGCCCTCAAAGTCCCGCT#AGTGGGAGGCGGGGCCAGC#..((((((((.....(((((((#)))))))...)))))))).	2084	2103	1	-27.2	1	4.481324e-06	0.309	0	0	-14.01	15	19	8	3UTR		0	0
hsa-miR-193b-3p	XM_017017875	APIP	AACTGGCCCTCAAAGTCCCGCT#TGAGGGCACAGTG#.(((((((((((..........#))))))).)))).	1152	1165	1	-19.3	1	0.000728488	0.75	0	0	-6.90779	11	13	7	3UTR		0	0
hsa-miR-193b-3p	XM_017017923	RSF1	AACTGGCCCTCAAAGTCCCGCT#GTGGGGGTGGGGGGGCAGG#..(((.(((((..(.((((((.#)))))).).))))).))).	10712	10731	1	-26.2	0	0.04786	0.529	0	0	-12.2293	15	19	6	3UTR	MIRT016606	1	1
hsa-miR-193b-3p	XM_017018136	SLC1A2	AACTGGCCCTCAAAGTCCCGCT#GGCTGGGAGTGGGGGCTTAGA#..((((((((((...(((((((#))).)))).)))))))).)).	10290	10311	1	-23	1	0.00449428	0.529	0	0	-7.83842	17	21	8	3UTR		0	0
hsa-miR-193b-3p	XM_017018136	SLC1A2	AACTGGCCCTCAAAGTCCCGCT#AGCAGGGATGGGCTGGG#..(((((((.....((((((((#))).)))))))))))).	10973	10990	1	-20.9	1	6.850396e-05	0.529	0	0	-14.5171	15	17	12	3UTR		0	0
hsa-miR-193b-3p	XM_017018137	SLC1A2	AACTGGCCCTCAAAGTCCCGCT#GGCTGGGAGTGGGGGCTTAGA#..((((((((((...(((((((#))).)))).)))))))).)).	9535	9556	1	-23	1	0.00449428	0.529	0	0	-7.83842	17	21	8	3UTR		0	0
hsa-miR-193b-3p	XM_017018138	SLC1A2	AACTGGCCCTCAAAGTCCCGCT#GGCTGGGAGTGGGGGCTTAGA#..((((((((((...(((((((#))).)))).)))))))).)).	9523	9544	1	-23	1	0.00449428	0.529	0	0	-7.83842	17	21	8	3UTR		0	0
hsa-miR-193b-3p	XM_017018139	SLC1A2	AACTGGCCCTCAAAGTCCCGCT#GGCTGGGAGTGGGGGCTTAGA#..((((((((((...(((((((#))).)))).)))))))).)).	9759	9780	1	-23	1	0.00449428	0.529	0	0	-7.83842	17	21	8	3UTR		0	0
hsa-miR-193b-3p	XM_017018142	TMEM135	AACTGGCCCTCAAAGTCCCGCT#GGGACATCAGGGCCAA#...(((((((....(((((...#)))))...))))))).	5685	5701	1	-23.4	0	0.000320573	0.544	0	0	-14.8321	12	16	7	3UTR		0	0
hsa-miR-193b-3p	XM_017018174	SPTBN2	AACTGGCCCTCAAAGTCCCGCT#TGGGGCGGTGAGGGCTAT#...(((((((((..((((((..#))))))..))))))))).	10258	10276	1	-27.4	0	0.00375648	0.574	0	0	-8.66051	15	18	9	3UTR	MIRT041544	0	0
hsa-miR-193b-3p	XM_017018355	PGGHG	AACTGGCCCTCAAAGTCCCGCT#AGTGGGAAGTCACCAGAGAACAGGAGAGGGATTTGAGGGCGAGA#..((.((((((.(((((((.((#.)).))))))))))))).)).	3004	3048	1	-27.3	0	0.00101579	0.382	0	0	-12.4228	17	21	13	3UTR		0	0
hsa-miR-193b-3p	XM_017019041	MON2	AACTGGCCCTCAAAGTCCCGCT#GGTGGGAGTATCACTTGAGGCCAGG#..((((.(((((((.(((((((#))))))).).....)))))))))).	10610	10635	1	-25.6	0	0.00154744	0.5	0	0	-7.23614	18	25	10	3UTR		0	0
hsa-miR-193b-3p	XM_017022124	GLDN	AACTGGCCCTCAAAGTCCCGCT#GGGAGGATCACTTGAGGCCAGG#..((((.((((((.((((..((#))..))))...)))))))))).	3135	3157	1	-20.8	0	0.000207699	0.441	0	0	-7.35753	16	22	10	3UTR		0	0
hsa-miR-193b-3p	XM_017022532	TLE3	AACTGGCCCTCAAAGTCCCGCT#TGGGACCTGCGGGAGGGCCGA#...((((((((...((((((..#))))))......)))))))).	2833	2854	1	-24.8	0	9.76411e-07	0.358	0	0	-12.0073	14	21	8	3UTR		0	0
hsa-miR-193b-3p	XM_017022967	ZNF785	AACTGGCCCTCAAAGTCCCGCT#GTGGGAGGCTGAGGCTGGTTA#((((((.(((((...((((((.#))))))...))))))))))).	1559	1580	1	-24.3	0	0.00115532	0.456	0	0	-8.36268	17	21	11	3UTR		0	0
hsa-miR-193b-3p	XM_017022967	ZNF785	AACTGGCCCTCAAAGTCCCGCT#GGTGGGACTAAGCATTTCTGCATTCCAGGACTGGTGGTCAGTG#.(((((((.(((.(((((((((#)))))))))......................))).))))))).	1409	1452	1	-23.6	1	0.000505745	0.574	0	0	-6.13885	19	43	9	3UTR		0	0
hsa-miR-193b-3p	XM_017023173	GRIN2A	AACTGGCCCTCAAAGTCCCGCT#GGGACAGTCGGGGCCAC#...(((((((....(((((...#)))))....))))))).	4107	4124	1	-23.5	0	0.000107079	0.515	0	0	-14.8321	12	17	7	3UTR		0	0
hsa-miR-193b-3p	XM_017023297	PRMT7	AACTGGCCCTCAAAGTCCCGCT#GCGGGGGCCTGGGGGCCGC#...(((((((((...((((((.#))))))...))))))))).	3530	3549	1	-29.2	0	6.191167e-10	0.324	0	0	-9.39596	15	19	9	3UTR		0	0
hsa-miR-193b-3p	XM_017023299	PRMT7	AACTGGCCCTCAAAGTCCCGCT#AGCACAGGGAGCTTGTGGGGCTGGCCGGTG#.(((((((.....((((((((.#.))))))))))))))).	2558	2588	1	-25.5	1	2.357892e-06	0.294	0	0	-13.5529	15	17	15	3UTR		0	0
hsa-miR-193b-3p	XM_017023528	SRL	AACTGGCCCTCAAAGTCCCGCT#AGTTGGGAGTTCATTGAGGCCAGG#..((((.(((((((.(((((((#))).)))).))...))))))))).	1582	1606	1	-22.6	0	0.000883393	0.426	0	0	-7.23614	18	24	9	3UTR		0	0
hsa-miR-193b-3p	XM_017023651	TVP23A	AACTGGCCCTCAAAGTCCCGCT#GGCTTCCTCGGCTATGGGGGCCAC#...(((((((((.((((.....#.)))).))))))))).	1990	2014	1	-22.5	0	1.162844e-07	0.397	0	0	-7.80367	13	16	9	3UTR		0	0
hsa-miR-193b-3p	XM_017023732	HSD3B7	AACTGGCCCTCAAAGTCCCGCT#GGCAGGGCTCTGGGGCCAGA#..(((((((.((.(((((.(((#))).))))).))))))))).	1313	1333	1	-28.1	1	7.008267e-08	0.368	0	0	-7.48864	17	20	9	3UTR		0	0
hsa-miR-193b-3p	XM_017023892	ADGRG1	AACTGGCCCTCAAAGTCCCGCT#GCAGGGATGAGGGCCC#....((((((((...((((((.#)).)))))))))))).	4055	4071	1	-24.6	0	2.899336e-05	0.426	0	0	-12.428	14	16	12	3UTR		0	0
hsa-miR-193b-3p	XM_017024235	CD300LG	AACTGGCCCTCAAAGTCCCGCT#GAGTTTGAGGGCCAGTG#.(((((((((((((.((.....#)).))))))))))))).	1417	1434	1	-28.5	1	2.033144e-05	0.397	0	0	-4.52877	15	17	13	3UTR		0	0
hsa-miR-193b-3p	XM_017024322	SAMD14	AACTGGCCCTCAAAGTCCCGCT#AGCGGGTGGGCATGAGCATGTGAGGACATGCTGGGAGGGCTCAGG#..(((((((((..(((((((((#)))))).......................)))..)))))).))).	3589	3634	1	-28	1	1.690921e-05	0.397	0	0	-9.59293	18	45	6	3UTR		0	0
hsa-miR-193b-3p	XM_017024551	SOCS7	AACTGGCCCTCAAAGTCCCGCT#GGCATGGGGCTGGGCCAGC#..(((((((....(((((((((#)))..))))))))))))).	4856	4875	1	-25.3	1	3.120571e-06	0.397	0	0	-13.6602	16	19	13	3UTR		0	0
hsa-miR-193b-3p	XM_017024578	SLFN14	AACTGGCCCTCAAAGTCCCGCT#GGGGCTTTAGGGTAGTTT#((((.(((((.((((((((...#))))))))))))))))).	4780	4798	1	-22.8	0	0.00180327	0.574	0	0	-10.8814	17	18	17	3UTR		0	0
hsa-miR-193b-3p	XM_017024678	MYH10	AACTGGCCCTCAAAGTCCCGCT#AGCAAACTGTGAAAGGGGCTTTGGAAAGAGTAGGAGGGGTGGGCTGGA#..(((((((((((((((((...#.))))))))))................))))))).	6660	6708	1	-24.5	1	0.022266	0.456	0	0	-4.957	17	35	10	3UTR		0	0
hsa-miR-193b-3p	XM_017024878	CA10	AACTGGCCCTCAAAGTCCCGCT#GGATCCTTTGAGGGTGCTGGTA#.(((((((((((((((((....#)))..))))))))..)))))).	1330	1352	1	-20.1	1	0.000671714	0.5	0	0	-3.79332	17	22	8	3UTR		0	0
hsa-miR-193b-3p	XM_017025099	ACBD4	AACTGGCCCTCAAAGTCCCGCT#AGCTCTTGAGCAAGTTGGGACTTGGGCCGGG#..(((((((...((((((((((#.))).)))))))))))))).	1834	1865	1	-26.8	1	1.172968e-05	0.382	0	0	-12.3711	17	20	14	3UTR		0	0
hsa-miR-193b-3p	XM_017025375	GOSR1	AACTGGCCCTCAAAGTCCCGCT#GGCGGATCGTTTGAGGCCAGG#..((((.((((((((..(((((#)))))..).))))))))))).	4788	4809	1	-25.1	0	0.00329752	0.426	0	0	-6.73374	17	21	11	3UTR	MIRT041393	0	0
hsa-miR-193b-3p	XM_017025930	MPPE1	AACTGGCCCTCAAAGTCCCGCT#TGGGAACCCAGTGAGCCAGGGGCCAGTTT#((((((((((((...(((((..#)))))......))).....))))))))).	1347	1376	1	-22.5	1	0.00052046	0.5	0	0	-6.81899	17	29	9	3UTR		0	0
hsa-miR-193b-3p	XM_017025969	LDLRAD4	AACTGGCCCTCAAAGTCCCGCT#GCGGGAGAGGGTTAGA#..(((((((((....((((((.#))))))))))))))).	7175	7191	1	-26.1	1	0.00324449	0.588	0	0	-11.1852	15	16	15	3UTR		0	0
hsa-miR-193b-3p	XM_017027011	MEIS3	AACTGGCCCTCAAAGTCCCGCT#GGCCCTGCTGGGACATGGGGGCCTGAGTG#.(((((((((((..(((((((.#.)).))))).))))))))..))).	2898	2927	1	-27.9	1	3.80988e-07	0.324	0	0	-5.9393	18	24	8	3UTR		0	0
hsa-miR-193b-3p	XM_017027111	CELF5	AACTGGCCCTCAAAGTCCCGCT#GGCAGGGGCGGGGGTGGGG#..((.((((((...((((((((#))).))))))))))).)).	1591	1610	1	-24	0	1.957032e-05	0.324	0	0	-14.5688	16	19	11	3UTR		0	0
hsa-miR-193b-3p	XM_017027281	KXD1	AACTGGCCCTCAAAGTCCCGCT#GGTGTGGAACCTGAGGGGCCAGC#..((((((((((...(((((((#)))).)))...)))))).)))).	3671	3694	1	-25.4	1	1.141754e-06	0.441	0	0	-7.83842	17	23	6	3UTR	MIRT041537	0	0
hsa-miR-193b-3p	XM_017027596	POLR3F	AACTGGCCCTCAAAGTCCCGCT#GGTGGGGCTTTTGGTAAGTGATAGGTCAGG#..((((((((.(((((((((((#))))))))))).)).........)))))).	1772	1802	1	-24.4	1	0.0127799	0.529	0	0	-7.78178	19	30	11	3UTR		0	0
hsa-miR-193b-3p	XM_017028162	GINS1	AACTGGCCCTCAAAGTCCCGCT#AGGGGACAGTGAAATTGGGGCTAGA#..((((((((((..(((((.((#)))))))..))).....))))))).	1427	1452	1	-23.1	1	0.00411907	0.544	0	0	-7.10297	17	25	7	3UTR		0	0
hsa-miR-193b-3p	XM_017028683	CABIN1	AACTGGCCCTCAAAGTCCCGCT#GGAGGGGTCCTTTAGGGCCAGG#..((((((((.((((((((.((#)).))))..)))))))))))).	7218	7240	1	-25	1	1.868563e-06	0.441	0	0	-7.78178	18	22	12	3UTR		0	0
hsa-miR-193b-3p	XM_017028696	RBFOX2	AACTGGCCCTCAAAGTCCCGCT#GCAGATTTTCCCCCAGATACTAGGAGGAAAGGGACTTTGGGGGGTGGG#..(((.(((((((((((((...#.))))))))))))).))).	5011	5059	1	-29.5	0	0.0261052	0.471	0	0	-6.85796	16	19	13	3UTR		0	0
hsa-miR-193b-3p	XM_017029356	FANCB	AACTGGCCCTCAAAGTCCCGCT#AGCTTTCCCTTGGGGGCTTTGAAATAACACCACCAGCGCTCTTACAGTTGAAGTGTGATTCAGGGCCAGTG#.(((((((((...((((.((((#.)))).)))).))))))))).	3447	3518	1	-24.2	1	0.000620953	0.515	0	0	-11.254	17	21	9	3UTR		0	0
hsa-miR-193b-3p	XM_017029787	XG	AACTGGCCCTCAAAGTCCCGCT#GGGGGAACCTCTCTTTGAGGGGTCAT#...((((((((((((((((.(.#).))))......))))))))).))).	2580	2606	1	-23.1	0	7.346582e-06	0.485	0	0	-6.51454	17	26	9	3UTR		0	0
hsa-miR-193b-3p	XM_024446074	PAM	AACTGGCCCTCAAAGTCCCGCT#AGTGGCTCAAGCCTATACTTCCAGGACTTTGGGAGGCCAA#...(((((((((((((((....#.)))))))))).))))).	4689	4729	1	-26.5	0	1.300125e-05	0.456	0	0	-6.51454	15	18	10	3UTR		0	0
hsa-miR-193b-3p	XM_024446078	PAM	AACTGGCCCTCAAAGTCCCGCT#AGTGGCTCAAGCCTATACTTCCAGGACTTTGGGAGGCCAA#...(((((((((((((((....#.)))))))))).))))).	4572	4612	1	-26.5	0	1.300125e-05	0.456	0	0	-6.51454	15	18	10	3UTR		0	0
hsa-miR-193b-3p	XM_024446418	HIVEP2	AACTGGCCCTCAAAGTCCCGCT#GGACTCTGAGGGTTGGG#..((((((((((.(((((....#))))).)))))))))).	10023	10040	1	-24.4	1	0.000153039	0.412	0	0	-6.24613	15	17	10	3UTR		0	0
hsa-miR-193b-3p	XM_024446419	HIVEP2	AACTGGCCCTCAAAGTCCCGCT#GGTCGCACTTGGACTCTGAGGGTTGGG#..((((((((((.(((((....#.))))).)))))))))).	9514	9541	1	-24.4	1	0.000153039	0.412	0	0	-6.24613	15	18	10	3UTR		0	0
hsa-miR-193b-3p	XM_024447187	PPP2R2A	AACTGGCCCTCAAAGTCCCGCT#AGTCAGTTTGGGGTCAGTG#.((((((((.((((.(...(((#))).).)))))))))))).	2051	2070	1	-18	1	0.0248469	0.603	0	0	-5.77128	16	19	12	3UTR		0	0
hsa-miR-193b-3p	XM_024447984	KCNMA1	AACTGGCCCTCAAAGTCCCGCT#AGATGGGACTTAATGGGCCAT#...((((((...((((((((((#)).))))))))...)))))).	9076	9097	1	-25.4	0	0.00119637	0.603	0	0	-13.9286	16	21	8	3UTR		0	0
hsa-miR-193b-3p	XM_024447985	KCNMA1	AACTGGCCCTCAAAGTCCCGCT#AGATGGGACTTAATGGGCCAT#...((((((...((((((((((#)).))))))))...)))))).	8914	8935	1	-25.4	0	0.00119637	0.603	0	0	-13.9286	16	21	8	3UTR		0	0
hsa-miR-193b-3p	XM_024447987	KCNMA1	AACTGGCCCTCAAAGTCCCGCT#AGATGGGACTTAATGGGCCAT#...((((((...((((((((((#)).))))))))...)))))).	9105	9126	1	-25.4	0	0.00119637	0.603	0	0	-13.9286	16	21	8	3UTR		0	0
hsa-miR-193b-3p	XM_024447988	KCNMA1	AACTGGCCCTCAAAGTCCCGCT#AGATGGGACTTAATGGGCCAT#...((((((...((((((((((#)).))))))))...)))))).	8943	8964	1	-25.4	0	0.00119637	0.603	0	0	-13.9286	16	21	8	3UTR		0	0
hsa-miR-193b-3p	XM_024447989	KCNMA1	AACTGGCCCTCAAAGTCCCGCT#AGATGGGACTTAATGGGCCAT#...((((((...((((((((((#)).))))))))...)))))).	8943	8964	1	-25.4	0	0.00119637	0.603	0	0	-13.9286	16	21	8	3UTR		0	0
hsa-miR-193b-3p	XM_024447990	KCNMA1	AACTGGCCCTCAAAGTCCCGCT#AGATGGGACTTAATGGGCCAT#...((((((...((((((((((#)).))))))))...)))))).	8931	8952	1	-25.4	0	0.00119637	0.603	0	0	-13.9286	16	21	8	3UTR		0	0
hsa-miR-193b-3p	XM_024448113	PLEKHA1	AACTGGCCCTCAAAGTCCCGCT#GGCGGGAGGATCACCTGAGCCTGGGGAGGTTGAGGCCACAGTG#.(((((.((((((..(((((((#)))))))......................)))))).).)))).	11257	11300	1	-23	0	0.000166062	0.397	0	0	-6.9293	18	43	7	3UTR		0	0
hsa-miR-193b-3p	XM_024448315	ENAH	AACTGGCCCTCAAAGTCCCGCT#GGCGGGAGGATTGCTTGAGGCCAGA#..((((.((((((..(((((((#))))))).......)))))))))).	8331	8356	1	-25.5	0	0.00883088	0.471	0	0	-8.09298	17	25	10	3UTR	MIRT041235	0	0
hsa-miR-193b-3p	XM_024448983	NAP1L1	AACTGGCCCTCAAAGTCCCGCT#GGTGGCTCATGCCTGTAATCCCAACACTTTGGGAGGCTGAGGCGGGCCAGTG#.(((((((((((...(((((..#.)))))...)))...)))))))).	8702	8754	1	-25.2	1	8.8604e-06	0.456	0	0	-6.67474	16	24	8	3UTR		0	0
hsa-miR-193b-3p	XM_024449578	TMEM179	AACTGGCCCTCAAAGTCCCGCT#AGTGCCCAGGGCTTTTGCACCAGAGTGGGTTCCGGGAGGGCCAC#...((((((((.....((((((#.))))))......)))))))).	712	756	1	-26.7	0	8.820529e-07	0.368	0	0	-12.9758	14	22	8	3UTR		0	0
hsa-miR-193b-3p	XM_024450159	ZFP90	AACTGGCCCTCAAAGTCCCGCT#GGCCTTGCCAGTGAAAAGGTTATTTTTGGACTCAGAGGGCTT#....(((((((..(((((....#.)))))..))))))).	2636	2678	1	-21.8	0	0.00476002	0.676	0	0	-14.1825	12	16	7	3UTR		0	0
hsa-miR-193b-3p	XM_024450296	PDPK1	AACTGGCCCTCAAAGTCCCGCT#GCCTTTCTCTGGGACACAGTTGGGGGCTGGC#..(((((((((((.((((((..#.))))))....))))))))))).	4560	4591	1	-25.8	1	3.655622e-05	0.397	0	0	-5.81384	17	23	11	3UTR		0	0
hsa-miR-193b-3p	XM_024450526	GJC1	AACTGGCCCTCAAAGTCCCGCT#GGCGGGGCTGGGCTGAGGGAGAGAAAGGGAAACACAGTGTTCCCAGG#..((((((((((.(((((((((#)))))))))....)))))).......................)))).	1455	1502	1	-27.3	1	0.00014685	0.529	0	0	-6.24613	19	47	9	3UTR		0	0
hsa-miR-193b-3p	XM_024450687	NAT9	AACTGGCCCTCAAAGTCCCGCT#GGTGGGAGCTGGAGGTGCAGG#..(((..((((....(((((((#)))))))....))))..))).	993	1014	1	-23.2	0	0.00221101	0.382	0	0	-14.6299	14	21	7	3UTR		0	0
hsa-miR-193b-3p	XM_024451616	MEIS3	AACTGGCCCTCAAAGTCCCGCT#GCTGGGACATGGGGGCCTGAGTG#.(((((((((((..(((((((.#)).))))).))))))))..))).	1798	1821	1	-27.9	1	3.80988e-07	0.324	0	0	-5.9393	18	23	8	3UTR		0	0
hsa-miR-193b-3p	XM_024451617	MEIS3	AACTGGCCCTCAAAGTCCCGCT#GGCCCTGCTGGGACATGGGGGCCTGAGTG#.(((((((((((..(((((((.#.)).))))).))))))))..))).	2338	2367	1	-27.9	1	3.80988e-07	0.324	0	0	-5.9393	18	24	8	3UTR		0	0
hsa-miR-193b-3p	XM_024452302	LARGE1	AACTGGCCCTCAAAGTCCCGCT#GGGACAATGAGGGCTG#....((((((((..(((((...#)))))..)))))))).	6138	6154	1	-25.8	0	9.797806e-05	0.485	0	0	-11.6925	13	16	8	3UTR		0	0
hsa-miR-193b-3p	XM_024452386	ATP2B3	AACTGGCCCTCAAAGTCCCGCT#GGTGGGCAGGGGGCTGGTTT#(((((((((((...(.((((((#))))))).))))))))))).	4658	4678	1	-25.5	1	0.00041251	0.456	0	0	-9.6634	18	20	11	3UTR		0	0
hsa-miR-193b-3p	XM_024452403	MBNL3	AACTGGCCCTCAAAGTCCCGCT#AGGGGTATTTAGGGCCAC#...(((((((.(((..(((.((#)))))..)))))))))).	3790	3808	1	-20.7	0	0.000944978	0.603	0	0	-10.3078	15	18	10	3UTR		1	0
hsa-miR-193b-3p	XM_024452896	MAP2	AACTGGCCCTCAAAGTCCCGCT#GTGGGGGTGGGTCCAGTTA#(((((((((....(.((((((.#)))))).)))).)))))).	7112	7131	1	-22.7	1	0.00044086	0.559	0	0	-13.3762	16	19	6	3UTR		0	0
hsa-miR-193b-3p	XM_024453112	C2orf92	AACTGGCCCTCAAAGTCCCGCT#GTGGGGCCGTCAAACCAGG#..((((........(((((((.#))))))).......)))).	780	799	1	-17.2	0	0.000141016	0.456	0	0	-19.4308	11	19	7	3UTR		0	0
hsa-miR-193b-3p	XM_024453487	SETD2	AACTGGCCCTCAAAGTCCCGCT#GGTGGGAGGATGGGTGGTCAGG#..((((((((((...(((((((#)))))))...)))).)))))).	7542	7564	1	-26.3	1	0.00165491	0.441	0	0	-7.83842	17	22	7	3UTR		0	0
hsa-miR-193b-3p	XM_024453829	ELAVL4	AACTGGCCCTCAAAGTCCCGCT#AGGGGATGGGGGCAAGG#..((.(((((((...((((.((#))))))))))))).)).	1958	1975	1	-20	0	0.00103743	0.588	0	0	-11.9575	15	17	13	3UTR		0	0
hsa-miR-193b-3p	XM_024453983	MFSD8	AACTGGCCCTCAAAGTCCCGCT#GGCCAAGGCAGGAGGATTGCTTGAGGCCAGG#..((((.(((((((((((..((#.))..)))))..)))))))))).	2581	2612	1	-21.6	0	3.876281e-06	0.471	0	0	-6.50069	17	23	10	3UTR		0	0
hsa-miR-193b-3p	XM_024454232	CEP44	AACTGGCCCTCAAAGTCCCGCT#AGCTGGGACTATAGGCCTGTA#.((.((((.....(((((((((#))).))))))...)))).)).	3026	3047	1	-20.9	0	0.00113295	0.529	0	0	-16.585	15	21	6	3UTR	MIRT016369	0	0
hsa-miR-193b-3p	XM_034751809	PANO1	AACTGGCCCTCAAAGTCCCGCT#GTGGAACTGCTGGGCCAGC#..(((((((....(((.((((.#)))).)))...))))))).	974	993	1	-24.2	1	0.000211085	0.382	0	0	-13.6602	14	19	7	3UTR		0	0
hsa-miR-193b-3p	XM_047416067	SCOC	AACTGGCCCTCAAAGTCCCGCT#GGTGGGGCTTTTGGGAGATAATTAGGTAATGAGGGTGAA#...(.(((((((((((((((((#))))))))))...................))))))).).	4352	4391	1	-25.3	0	0.0347056	0.574	0	0	-10.6336	18	39	10	3UTR		0	0
hsa-miR-193b-3p	XM_047416094	BMPR1B	AACTGGCCCTCAAAGTCCCGCT#AGATGGGACAGCAGAGGACAGTTA#(((((..((((...((((((((#)).))))))....)))).))))).	2971	2995	1	-20.3	0	0.00354615	0.529	0	0	-12.875	17	24	6	3UTR		0	0
hsa-miR-193b-3p	XM_047416144	NSD2	AACTGGCCCTCAAAGTCCCGCT#GGCGCTTTAGGGTGCTGGACTGTATGGCTGAGGGCTGGTTG#((((((((((((.(((((((((#.))))..))))).......)))))))))))).	3459	3500	1	-26.1	1	0.000147486	0.471	0	0	-5.22671	21	32	12	3UTR	MIRT016397	0	0
hsa-miR-193b-3p	XM_047416246	MND1	AACTGGCCCTCAAAGTCCCGCT#GGATCTTGGGGGCGGTTT#((((.((((((((.((((....#)))).)))))))))))).	1174	1192	1	-20.9	0	0.00135962	0.456	0	0	-8.91345	16	18	12	3UTR	MIRT016462	0	0
hsa-miR-193b-3p	XM_047416582	GNPDA1	AACTGGCCCTCAAAGTCCCGCT#GGTGGGTGGGGCCAA#...((((((.((....((((((#)))))))))))))).	1643	1658	1	-21.4	0	0.000320624	0.471	0	0	-10.8715	14	15	14	3UTR		0	0
hsa-miR-193b-3p	XM_047416614	MARCHF6	AACTGGCCCTCAAAGTCCCGCT#GCGGTGGCTCCGGCCGGTTG#((((((((.....((((((((.#)))).))))..)))))))).	3954	3974	1	-24	1	3.347615e-07	0.353	0	0	-13.6972	16	20	8	3UTR		0	0
hsa-miR-193b-3p	XM_047416734	SHROOM1	AACTGGCCCTCAAAGTCCCGCT#GTGGGGCTGGCAGGGGTTGGTTG#((((((((((...((((((((.#))))))))....)))))))))).	3003	3026	1	-27.4	1	0.00864293	0.456	0	0	-11.3983	18	23	10	3UTR		0	0
hsa-miR-193b-3p	XM_047417248	PAM	AACTGGCCCTCAAAGTCCCGCT#GGCAGGTACAGTGGCTCAAGCCTATACTTCCAGGACTTTGGGAGGCCAA#...(((((((((((((((....#.)))))))))).))))).	3593	3642	1	-26.5	0	1.300125e-05	0.456	0	0	-6.51454	15	18	10	3UTR		0	0
hsa-miR-193b-3p	XM_047417315	PIK3R1	AACTGGCCCTCAAAGTCCCGCT#GGTGGGGGGTGGGGGTAGTG#.(((.(((((((...(((((((#)))))))..)))))))))).	7906	7926	1	-23.1	0	8.279139e-05	0.456	0	0	-10.7938	17	20	10	3UTR		0	1
hsa-miR-193b-3p	XM_047417317	PIK3R1	AACTGGCCCTCAAAGTCCCGCT#GGTGGGGGGTGGGGGTAGTG#.(((.(((((((...(((((((#)))))))..)))))))))).	15321	15341	1	-23.1	0	8.279139e-05	0.456	0	0	-10.7938	17	20	10	3UTR		0	1
hsa-miR-193b-3p	XM_047417436	CNOT6	AACTGGCCCTCAAAGTCCCGCT#AGGGGGACGGGGCCAT#...(((((((....(((((.((#)).)))))))))))).	6135	6151	1	-24.6	0	0.00394037	0.485	0	0	-14.8321	14	16	12	3UTR	MIRT016605	1	0
hsa-miR-193b-3p	XM_047417744	PTCD2	AACTGGCCCTCAAAGTCCCGCT#GCGGGGGTCCTGGGTTGGCCAGTG#.(((((((((((.(.((((((.#)))))).)..))))..))))))).	7098	7122	1	-27.9	1	5.740648e-06	0.397	0	0	-5.81791	18	24	7	3UTR		0	0
hsa-miR-193b-3p	XM_047417820	FAM172A	AACTGGCCCTCAAAGTCCCGCT#AGCGCGGGCTGAGCGCTGCCAGTC#.((((((((((..(((((((((#)))).)))))))).)..)))))).	1381	1405	1	-23.4	1	4.851067e-07	0.324	0	0	-8.42926	19	24	8	3UTR		0	0
hsa-miR-193b-3p	XM_047418568	FYN	AACTGGCCCTCAAAGTCCCGCT#GTGGAGACTGTGGCCGGC#..((((((.....((((((((.#)))).))))..)))))).	2555	2573	1	-21.5	1	2.145454e-05	0.412	0	0	-14.7166	14	18	6	3UTR		0	0
hsa-miR-193b-3p	XM_047418639	ADGRF1	AACTGGCCCTCAAAGTCCCGCT#AGATGAGGGCATGGGGGCTCAGA#..((((((((((..((((((((#)).)).)))).))))))).))).	2931	2954	1	-21.9	1	0.000275536	0.471	0	0	-7.10297	18	23	7	3UTR		0	0
hsa-miR-193b-3p	XM_047419059	TRERF1	AACTGGCCCTCAAAGTCCCGCT#AGCGTGATTTCCTGGGCCGGTG#.((((((((...(((((.((((#)))).)))))...)))))))).	5497	5519	1	-25.5	1	0.00816049	0.441	0	0	-11.2074	17	22	8	3UTR		0	0
hsa-miR-193b-3p	XM_047419065	TRERF1	AACTGGCCCTCAAAGTCCCGCT#AGCGTGATTTCCTGGGCCGGTG#.((((((((...(((((.((((#)))).)))))...)))))))).	5430	5452	1	-25.5	1	0.00816049	0.441	0	0	-11.2074	17	22	8	3UTR		0	0
hsa-miR-193b-3p	XM_047419593	RIPOR2	AACTGGCCCTCAAAGTCCCGCT#GGTGGGACTTGTTCCCTTTGAGGCAGAGCTCCAGA#..((((.(((((((((((((((#))))))))))........))))).......)))).	2404	2439	1	-23.1	0	0.000220531	0.441	0	0	-6.50069	19	35	10	3UTR		0	0
hsa-miR-193b-3p	XM_047419935	ILDR2	AACTGGCCCTCAAAGTCCCGCT#AGTGGCTGGGTGAGGGTCGGA#..((((((((((.....(((((#))))).....)))))))))).	4170	4191	1	-24.1	1	0.00107976	0.515	0	0	-8.07147	15	21	10	3UTR		0	0
hsa-miR-193b-3p	XM_047419935	ILDR2	AACTGGCCCTCAAAGTCCCGCT#GTGGGGTTACAGAGGGGGCTGGTA#.((((((((((...(((((((.#)))))...))...)))))))))).	8424	8448	1	-24.3	1	0.00217473	0.544	0	0	-9.2861	17	24	10	3UTR		0	0
hsa-miR-193b-3p	XM_047419938	ILDR2	AACTGGCCCTCAAAGTCCCGCT#AGTGGCTGGGTGAGGGTCGGA#..((((((((((.....(((((#))))).....)))))))))).	4050	4071	1	-24.1	1	0.00107976	0.515	0	0	-8.07147	15	21	10	3UTR		0	0
hsa-miR-193b-3p	XM_047419938	ILDR2	AACTGGCCCTCAAAGTCCCGCT#GTGGGGTTACAGAGGGGGCTGGTA#.((((((((((...(((((((.#)))))...))...)))))))))).	8304	8328	1	-24.3	1	0.00217473	0.544	0	0	-9.2861	17	24	10	3UTR		0	0
hsa-miR-193b-3p	XM_047419950	ILDR2	AACTGGCCCTCAAAGTCCCGCT#AGTGGCTGGGTGAGGGTCGGA#..((((((((((.....(((((#))))).....)))))))))).	3846	3867	1	-24.1	1	0.00107976	0.515	0	0	-8.07147	15	21	10	3UTR		0	0
hsa-miR-193b-3p	XM_047419950	ILDR2	AACTGGCCCTCAAAGTCCCGCT#GTGGGGTTACAGAGGGGGCTGGTA#.((((((((((...(((((((.#)))))...))...)))))))))).	8100	8124	1	-24.3	1	0.00217473	0.544	0	0	-9.2861	17	24	10	3UTR		0	0
hsa-miR-193b-3p	XM_047419971	ELN	AACTGGCCCTCAAAGTCCCGCT#GCGGGGCTGTGCAGACTGGGGTGCCAGG#..((((((((((.((((((((.#))))))))........))))).))))).	2871	2899	1	-29.8	1	2.276041e-06	0.25	0	0	-6.24613	18	28	8	3UTR		0	0
hsa-miR-193b-3p	XM_047420091	TNPO3	AACTGGCCCTCAAAGTCCCGCT#GGCGGGTGGGTGGGGAGTGCAGG#..((((((((((....((((((#))))))....))))).)).))).	3878	3901	1	-22.8	1	0.0725798	0.544	0	0	-8.07147	16	23	6	3UTR		0	0
hsa-miR-193b-3p	XM_047420308	AGFG2	AACTGGCCCTCAAAGTCCCGCT#GGCGGGAGAGGAGCCAC#...((((((((....(((((((#))))))))))).)))).	2045	2062	1	-24.5	0	2.013365e-05	0.426	0	0	-12.7428	15	17	11	3UTR		0	0
hsa-miR-193b-3p	XM_047420869	CALD1	AACTGGCCCTCAAAGTCCCGCT#GCAGGACGAGCTCAGTTGTAGAGGGCTAA#...((((((((...((((.((.#)).)))).............)))))))).	1868	1897	1	-21	0	0.000719452	0.574	0	0	-12.0073	14	29	8	3UTR		0	0
hsa-miR-193b-3p	XM_047420874	CALD1	AACTGGCCCTCAAAGTCCCGCT#GCAGGACGAGCTCAGTTGTAGAGGGCTAA#...((((((((...((((.((.#)).)))).............)))))))).	1883	1912	1	-21	0	0.000719452	0.574	0	0	-12.0073	14	29	8	3UTR		0	0
hsa-miR-193b-3p	XM_047421053	CEP41	AACTGGCCCTCAAAGTCCCGCT#GTGGGTGTCTTCACACCGGGGAGGAGGGCCT#....(((((((....(((((..#.)))))..))))))).	1860	1891	1	-23.8	0	2.530413e-07	0.368	0	0	-15.7748	12	16	7	3UTR	MIRT016483	0	0
hsa-miR-193b-3p	XM_047421075	FAM131B	AACTGGCCCTCAAAGTCCCGCT#AGGGGGAGCATGAGGGCTG#....((((((((...((((.((#)).))))...)))))))).	1990	2009	1	-25.3	0	3.860165e-05	0.412	0	0	-12.428	14	19	8	3UTR		1	0
hsa-miR-193b-3p	XM_047421184	MTR	AACTGGCCCTCAAAGTCCCGCT#GGCCTGGGAATGGGATTGCTGAGGGCCC#....((((((((.(((((((..#.)))))))..)))))))).	7576	7604	1	-26.5	0	2.165221e-05	0.397	0	0	-10.8357	15	19	8	3UTR	MIRT041354	0	0
hsa-miR-193b-3p	XM_047421187	MTR	AACTGGCCCTCAAAGTCCCGCT#GCAAAGAGGCCTGGGAATGGGATTGCTGAGGGCCC#....((((((((.(((((((..#.)))))))..)))))))).	6488	6523	1	-26.5	0	2.165221e-05	0.397	0	0	-10.8357	15	19	8	3UTR	MIRT041354	0	0
hsa-miR-193b-3p	XM_047421687	GFRA2	AACTGGCCCTCAAAGTCCCGCT#AGCGGGGCTGGCCATGAGGGTCCAC#...(((((((((.(((((((((#))))))))).....)))))).))).	2004	2029	1	-28.6	0	4.169775e-07	0.353	0	0	-7.80367	18	25	9	3UTR		0	0
hsa-miR-193b-3p	XM_047421902	GDAP1	AACTGGCCCTCAAAGTCCCGCT#GGGATAGTGGGCTGGA#..(((((((.(...(((((...#))))).).))))))).	1226	1242	1	-20.1	1	3.321748e-05	0.515	0	0	-11.6923	13	16	7	3UTR		0	0
hsa-miR-193b-3p	XM_047422069	RP1	AACTGGCCCTCAAAGTCCCGCT#TGGGGAGGGTCAGTTT#(((((((((((.....((((..#))))))))))))))).	4691	4707	1	-21.9	1	0.000168673	0.485	0	0	-10.3988	15	16	15	3UTR		0	0
hsa-miR-193b-3p	XM_047422157	ELOC	AACTGGCCCTCAAAGTCCCGCT#GGCGGGTAGATCACTTGAGGCCAGG#..((((.((((.((((((((((#))))))......)))))))))))).	1879	1904	1	-25	0	0.0028591	0.412	0	0	-9.84749	18	25	12	3UTR		0	0
hsa-miR-193b-3p	XM_047422330	NUDCD1	AACTGGCCCTCAAAGTCCCGCT#GGCCAAGTCTAGAGTCAGAATGAGGGGACTACACAAGCTGACAGCGGATGGTATGACTCATTGGGGGCCAT#...(((((((((((((((((((#.))))).......))))..)))))))))).	2479	2550	1	-27.5	0	0.000264482	0.515	0	0	-6.51454	19	30	10	3UTR		0	0
hsa-miR-193b-3p	XM_047422509	PRSS51	AACTGGCCCTCAAAGTCCCGCT#GGATATGGAGGGCCAA#...((((((((...((((....#))))...)))))))).	2562	2578	1	-22.3	0	0.00503596	0.603	0	0	-12.0073	12	16	8	3UTR		0	0
hsa-miR-193b-3p	XM_047422877	POU2F1	AACTGGCCCTCAAAGTCCCGCT#GGGACCCTGAGGGTG#.....(((((((..(((((...#)))))..))))))).	10243	10258	1	-23	0	5.350612e-07	0.471	0	0	-15.8116	12	15	7	3UTR		0	0
hsa-miR-193b-3p	XM_047422905	PRXL2C	AACTGGCCCTCAAAGTCCCGCT#GGATTTTGGGGGGTTGGG#..((((((((((((((((....#)))))))))))).)))).	1223	1241	1	-21.1	1	0.00115306	0.588	0	0	-4.957	16	18	12	3UTR		0	0
hsa-miR-193b-3p	XM_047423214	FBXW2	AACTGGCCCTCAAAGTCCCGCT#GGTGGGGGAGGGCTTGTTT#(((.(((((((....(((((((#)))))))))))))).))).	1626	1645	1	-23.6	0	0.00022225	0.412	0	0	-13.1978	17	19	14	3UTR		0	0
hsa-miR-193b-3p	XM_047423711	SUSD4	AACTGGCCCTCAAAGTCCCGCT#AGTGGTGAGGGCTGGA#..((((((((((.....(((((#))))))))))))))).	2805	2821	1	-21.8	1	0.00095181	0.559	0	0	-8.07147	15	16	15	3UTR		0	0
hsa-miR-193b-3p	XM_047424310	KIRREL1	AACTGGCCCTCAAAGTCCCGCT#AGGGGGTGTGTGTGGGGGTTAGTG#.(((((((((((....(((.((#)).)))......))))))))))).	6924	6948	1	-24.5	1	0.0715788	0.5	0	0	-6.90779	16	24	11	3UTR		0	0
hsa-miR-193b-3p	XM_047424436	H4C15	AACTGGCCCTCAAAGTCCCGCT#GGCTGCTGGGAAACCGGGGAAAACTTGGCTATGGACGTGGGGGCTTGTG#.((.((((((((..((((.(((#.)))...)))).)))))))).)).	1693	1742	1	-24.3	0	0.00928769	0.515	0	0	-8.97132	17	24	8	3UTR		0	0
hsa-miR-193b-3p	XM_047424836	INPP5F	AACTGGCCCTCAAAGTCCCGCT#ACTTTGGGAGGCCAGG#..((((((((((((((......#)))))))).)))))).	4241	4257	1	-22.6	1	1.770214e-05	0.485	0	0	-4.957	14	16	8	3UTR		0	0
hsa-miR-193b-3p	XM_047424897	LARP4B	AACTGGCCCTCAAAGTCCCGCT#GCAGATGAATGAGGGCCAGTG#.(((((((((((..(((..((.#)).)))...))))))))))).	3129	3150	1	-26	1	0.00185129	0.412	0	0	-5.9393	16	21	11	3UTR		0	0
hsa-miR-193b-3p	XM_047424940	ENAH	AACTGGCCCTCAAAGTCCCGCT#GGCGGGAGGATTGCTTGAGGCCAGA#..((((.((((((..(((((((#))))))).......)))))))))).	8268	8293	1	-25.5	0	0.00883088	0.471	0	0	-8.09298	17	25	10	3UTR	MIRT041235	0	0
hsa-miR-193b-3p	XM_047425805	CAMK2G	AACTGGCCCTCAAAGTCCCGCT#GGACTTAGGGGGACCAGG#..(((((((((.((((((....#)))))).))))).)))).	1838	1856	1	-25.3	1	0.000267089	0.382	0	0	-8.3038	15	18	6	3UTR		0	0
hsa-miR-193b-3p	XM_047427024	NUMA1	AACTGGCCCTCAAAGTCCCGCT#GGTGGGATTTGGAGTGATGGGAAGGTTTTTAAGGGCCGGG#..((((((((..((((((((((#)))))))))).....................)))))))).	6979	7019	1	-27	1	0.0009508	0.574	0	0	-11.1286	18	40	10	3UTR		0	0
hsa-miR-193b-3p	XM_047427146	SLC35F2	AACTGGCCCTCAAAGTCCCGCT#GGCGGGAAAGCAGGCTGTCCAGGCTGGGCTTGGTGGTCAGG#..((((((.((.((((((.(((#.))).)))))))).)))))).	1428	1469	1	-22.7	1	0.000444566	0.338	0	0	-9.36019	17	21	8	3UTR		0	0
hsa-miR-193b-3p	XM_047427187	ANO1	AACTGGCCCTCAAAGTCCCGCT#AGCGGGGCTGGGCAGGCCAGC#..((((((..(..(((((((((#)))))))))..)..)))))).	2226	2247	1	-30.2	1	2.300949e-09	0.294	0	0	-11.8918	16	21	9	3UTR		0	0
hsa-miR-193b-3p	XM_047427294	EMSY	AACTGGCCCTCAAAGTCCCGCT#AGTGGGAGGTACTTTTTGGGTGGCTTGTG#.((.((((((((((((((((((#)))))))......))))))).)))).)).	4361	4390	1	-23.1	0	0.000261874	0.588	0	0	-6.82535	20	29	7	3UTR		0	0
hsa-miR-193b-3p	XM_047427436	SLC1A2	AACTGGCCCTCAAAGTCCCGCT#GGCTGGGAGTGGGGGCTTAGA#..((((((((((...(((((((#))).)))).)))))))).)).	10115	10136	1	-23	1	0.00449428	0.529	0	0	-7.83842	17	21	8	3UTR		0	0
hsa-miR-193b-3p	XM_047427436	SLC1A2	AACTGGCCCTCAAAGTCCCGCT#AGCAGGGATGGGCTGGG#..(((((((.....((((((((#))).)))))))))))).	10798	10815	1	-20.9	1	6.850396e-05	0.529	0	0	-14.5171	15	17	12	3UTR		0	0
hsa-miR-193b-3p	XM_047427440	SLC1A2	AACTGGCCCTCAAAGTCCCGCT#GGCTGGGAGTGGGGGCTTAGA#..((((((((((...(((((((#))).)))).)))))))).)).	9402	9423	1	-23	1	0.00449428	0.529	0	0	-7.83842	17	21	8	3UTR		0	0
hsa-miR-193b-3p	XM_047427440	SLC1A2	AACTGGCCCTCAAAGTCCCGCT#AGCAGGGATGGGCTGGG#..(((((((.....((((((((#))).)))))))))))).	10085	10102	1	-20.9	1	6.850396e-05	0.529	0	0	-14.5171	15	17	12	3UTR		0	0
hsa-miR-193b-3p	XM_047427610	NAA40	AACTGGCCCTCAAAGTCCCGCT#AGTGGGACTGGGAACTCCTTAGAGAGGGCCT#....(((((((..(((((((((#)))))))))..............))))))).	2625	2656	1	-28	0	0.000202351	0.456	0	0	-14.1825	16	31	9	3UTR		0	0
hsa-miR-193b-3p	XM_047427855	SYT7	AACTGGCCCTCAAAGTCCCGCT#AGCGGTGGGCCGAGGGCCGGG#..(((((((((...((((((((#)))))..))).))))))))).	4222	4243	1	-28.4	1	1.601141e-06	0.338	0	0	-10.4498	17	21	9	3UTR		0	0
hsa-miR-193b-3p	XM_047428762	ACACB	AACTGGCCCTCAAAGTCCCGCT#GGCGGGGCAGTGAGGGGTGGG#..(((.((((((..((((((((#))))))))..)))))).))).	9090	9111	1	-30.5	0	0.0441835	0.426	0	0	-9.00393	17	21	8	3UTR		0	0
hsa-miR-193b-3p	XM_047428881	CNOT2	AACTGGCCCTCAAAGTCCCGCT#AGGGGACTTTGTCGCCCTGTGCACTAAAAGGGCCAGA#..(((((((((((((((((.((#))))))))))).................)))))))).	2630	2667	1	-28.9	1	0.00363806	0.471	0	0	-4.957	19	37	11	3UTR		0	0
hsa-miR-193b-3p	XM_047428909	OLR1	AACTGGCCCTCAAAGTCCCGCT#TGGGACAAGTGGGGAGCCC#....((((((((..((((((..#))))))...))))).))).	2151	2170	1	-21.2	0	0.000147316	0.559	0	0	-11.6925	14	19	6	3UTR		0	0
hsa-miR-193b-3p	XM_047429197	RIMKLB	AACTGGCCCTCAAAGTCCCGCT#AGTGAGAAGTATTGAGAACTTTCGGGGTCAGTG#.(((((((((.(((((......#.))))).))))))))).	1162	1195	1	-20	1	0.000129969	0.544	0	0	-6.6181	14	17	9	3UTR		0	0
hsa-miR-193b-3p	XM_047429403	WNK1	AACTGGCCCTCAAAGTCCCGCT#AGGGGGTGGGGGGCTAGTTT#(((((((((((.....(((.((#)).)))..))))))))))).	6793	6813	1	-25.3	1	0.0012306	0.544	0	0	-10.3988	16	20	11	3UTR	MIRT041474	0	0
hsa-miR-193b-3p	XM_047429403	WNK1	AACTGGCCCTCAAAGTCCCGCT#AGGGGGTGGGTGGGGGTGGGA#..((.(((((((....(((.((#)).)))....))))))).)).	5508	5529	1	-23.4	0	0.0633455	0.456	0	0	-12.1905	14	21	7	3UTR	MIRT041474	0	0
hsa-miR-193b-3p	XM_047429805	CRADD	AACTGGCCCTCAAAGTCCCGCT#GGTGGGTCTTATCACAGAATATTCCAGGGCTGGG#..((((((((..(((.((((((#)))))).)))...............)))))))).	617	651	1	-21.7	1	0.00062169	0.529	0	0	-11.3616	17	34	8	3UTR		0	0
hsa-miR-193b-3p	XM_047430436	GPALPP1	AACTGGCCCTCAAAGTCCCGCT#AGCACTTCAAGAGGCCAAGACAGGAGGATCACTTGAGGGCCAGG#..(((((((((((.((((..((#.))..))))...))))))))))).	7468	7512	1	-28.2	1	2.154002e-05	0.441	0	0	-5.81384	17	24	11	3UTR		0	0
hsa-miR-193b-3p	XM_047430790	MTRF1	AACTGGCCCTCAAAGTCCCGCT#AGTGCTTTGAAGGGCCAA#...(((((((((((((......#.))))))).)))))).	3159	3177	1	-21	0	0.000683262	0.544	0	0	-6.51454	13	16	7	3UTR		0	0
hsa-miR-193b-3p	XM_047430856	DHDDS	AACTGGCCCTCAAAGTCCCGCT#GGCGGGAATGAGGGGCTGGA#..((((((((((...(((((((#))))))).)))))).)))).	2946	2966	1	-26.4	1	3.276935e-05	0.426	0	0	-7.83842	17	20	7	3UTR		0	0
hsa-miR-193b-3p	XM_047430856	DHDDS	AACTGGCCCTCAAAGTCCCGCT#GCAGGGCATGGGGCCAGG#..(((((((.((..((((.((.#)).)))).))))))))).	1924	1942	1	-25	1	1.986287e-08	0.397	0	0	-8.34548	15	18	9	3UTR		0	0
hsa-miR-193b-3p	XM_047430958	SLC25A29	AACTGGCCCTCAAAGTCCCGCT#GCGGGACTAGGGTGGGG#..((.(((((...((((((((.#))))))))))))).)).	2365	2382	1	-27.6	0	0.0026349	0.353	0	0	-16.5367	15	17	13	3UTR		0	0
hsa-miR-193b-3p	XM_047430958	SLC25A29	AACTGGCCCTCAAAGTCCCGCT#AGTGGGCACAGGGGTGGCTAGTTG#(((((((((((...((((((((#)))))).))..))).)))))))).	2722	2746	1	-25	1	0.00382324	0.294	0	0	-9.43035	19	24	8	3UTR		0	0
hsa-miR-193b-3p	XM_047431171	PPP1R13B	AACTGGCCCTCAAAGTCCCGCT#GGTTGGGGCTGGGGGTGGACTGGTGTGAGGGCAGACCAGGGCCAGG#..((((((((....(((((((.#.))).)))).....)))))))).	4212	4258	1	-25.3	1	3.97708e-07	0.353	0	0	-13.2745	15	23	8	3UTR		0	0
hsa-miR-193b-3p	XM_047431290	SNX27	AACTGGCCCTCAAAGTCCCGCT#GGCGGGGTTTCACCATGATGGCCAGG#..((((((.(((((((((((((#)))))))))).....))).)))))).	4902	4928	1	-25.7	1	0.0020508	0.529	0	0	-6.01339	19	26	10	3UTR		1	1
hsa-miR-193b-3p	XM_047431351	ITPK1	AACTGGCCCTCAAAGTCCCGCT#GGGCTGGGGGGCCGGTG#.((((((((((..(((((....#))))).)))))))))).	3600	3617	1	-27.4	1	1.088446e-06	0.279	0	0	-8.42926	15	17	10	3UTR		0	0
hsa-miR-193b-3p	XM_047431617	GPR61	AACTGGCCCTCAAAGTCCCGCT#GGCCGCTGGACACTCGGAGGGATATGGGGCTGGGGCCAGTTA#((((((((((...(((((((..#.))))))))))))))))).	2155	2197	1	-28.8	1	0.000185899	0.412	0	0	-11.3983	17	19	17	3UTR		0	0
hsa-miR-193b-3p	XM_047431978	ENTPD5	AACTGGCCCTCAAAGTCCCGCT#AGTGGATCTTTGGGGGTGTGAAATACCAGTA#.((((((((((((((..(((((#)))))..))))))))).........))))).	1810	1841	1	-26.1	1	0.00143589	0.5	0	0	-4.02637	19	31	9	3UTR		0	0
hsa-miR-193b-3p	XM_047432080	ACBD6	AACTGGCCCTCAAAGTCCCGCT#GGCTCTAGGGGACTATGGGAGTAGGCCAGTG#.(((((((((((.((((((.((#.)))))))).))))....))))))).	4340	4371	1	-27.7	1	4.020696e-05	0.412	0	0	-5.08246	19	26	8	3UTR	MIRT041521	0	0
hsa-miR-193b-3p	XM_047432115	DYRK3	AACTGGCCCTCAAAGTCCCGCT#GTGGGGTGGGGGAGCACCAGG#..((((((((((...((((((.#))))))))))))....)))).	2514	2535	1	-22.7	1	5.522862e-05	0.412	0	0	-7.83842	16	21	12	3UTR		0	0
hsa-miR-193b-3p	XM_047432250	FAN1	AACTGGCCCTCAAAGTCCCGCT#GCAGGGATGAGGGGCTAGA#..((((((((....(((((((.#)).)))))..)))))))).	3467	3486	1	-24.3	1	0.00157859	0.426	0	0	-13.2745	15	19	8	3UTR		0	0
hsa-miR-193b-3p	XM_047432250	FAN1	AACTGGCCCTCAAAGTCCCGCT#AGTACGGACTTGGAGGGCAGC#..((.((((((.((((((.(((#)))..)))))).)))))))).	3796	3817	1	-22.7	0	0.00281083	0.397	0	0	-12.4228	17	21	8	3UTR		0	0
hsa-miR-193b-3p	XM_047432276	MGA	AACTGGCCCTCAAAGTCCCGCT#GTGGCTTTTGAGGGTCAGC#..(((((((((((((..((((.#)))).))))))))))))).	11422	11441	1	-26.2	1	7.530668e-06	0.5	0	0	-5.19005	17	19	13	3UTR		0	0
hsa-miR-193b-3p	XM_047432450	IL16	AACTGGCCCTCAAAGTCCCGCT#GGGAAGGGTGGTGGAGCCAGTA#.(((((((((((...((((...#))))....))).)).)))))).	5126	5148	1	-22.4	1	0.000317265	0.485	0	0	-6.67474	15	22	6	3UTR		0	0
hsa-miR-193b-3p	XM_047432516	MAN2A2	AACTGGCCCTCAAAGTCCCGCT#GGCACAGGGGACTAGGGGCATGTA#.((..(((((...(((((((((#)))....)))))).)))))..)).	3409	3433	1	-22.2	0	0.00168562	0.471	0	0	-18.4051	16	24	6	3UTR		0	0
hsa-miR-193b-3p	XM_047432540	MYO5A	AACTGGCCCTCAAAGTCCCGCT#GCCGACTATGGGGATCTTTGGGCCAGTTT#(((((((((..((((((((...#.)))).))))))))))))).	8744	8773	1	-25.7	1	0.00161841	0.515	0	0	-8.00486	17	20	13	3UTR	MIRT041583	0	0
hsa-miR-193b-3p	XM_047432541	MYO5A	AACTGGCCCTCAAAGTCCCGCT#GCCGACTATGGGGATCTTTGGGCCAGTTT#(((((((((..((((((((...#.)))).))))))))))))).	8672	8701	1	-25.7	1	0.00161841	0.515	0	0	-8.00486	17	20	13	3UTR	MIRT041583	0	0
hsa-miR-193b-3p	XM_047432542	MYO5A	AACTGGCCCTCAAAGTCCCGCT#GCCGACTATGGGGATCTTTGGGCCAGTTT#(((((((((..((((((((...#.)))).))))))))))))).	8669	8698	1	-25.7	1	0.00161841	0.515	0	0	-8.00486	17	20	13	3UTR	MIRT041583	0	0
hsa-miR-193b-3p	XM_047432878	KCNAB2	AACTGGCCCTCAAAGTCCCGCT#AGCTGCCGGGGAGGGAGAGTGAGGGAACGGGGCTGGCCTTGGGGGCCT#....((((((((((((((((..#.)))))))....))))))))).	1853	1901	1	-28.6	0	7.448958e-08	0.338	0	0	-9.54656	16	22	9	3UTR		0	0
hsa-miR-193b-3p	XM_047432996	TP53BP1	AACTGGCCCTCAAAGTCCCGCT#GGCTTTGTGGGCCAT#...((((((.(((((((.....#))))))).)))))).	7080	7095	1	-22.5	0	2.096051e-05	0.574	0	0	-7.75705	13	15	7	3UTR		0	0
hsa-miR-193b-3p	XM_047433394	USP3	AACTGGCCCTCAAAGTCCCGCT#GGTTTTTTTTTTTTCTTTTTTTTGGTTGGGGGCGGTGGGGGTTGGTA#.(((((((((((..((((((((#.)))..)))))..))))))))))).	3149	3196	1	-26.8	1	0.00417764	0.529	0	0	-5.9393	19	25	11	3UTR		0	0
hsa-miR-193b-3p	XM_047433395	USP3	AACTGGCCCTCAAAGTCCCGCT#GGTTTTTTTTTTTTCTTTTTTTTGGTTGGGGGCGGTGGGGGTTGGTA#.(((((((((((..((((((((#.)))..)))))..))))))))))).	3265	3312	1	-26.8	1	0.00417764	0.529	0	0	-5.9393	19	25	11	3UTR		0	0
hsa-miR-193b-3p	XM_047433594	CMTM3	AACTGGCCCTCAAAGTCCCGCT#GGCGGGGGTCGGGGGTCT#....(((((((..(.(((((((#))))))).).))))))).	1008	1026	1	-24.5	0	0.00100654	0.456	0	0	-14.9179	15	18	7	3UTR		0	0
hsa-miR-193b-3p	XM_047433597	CMTM3	AACTGGCCCTCAAAGTCCCGCT#GGCGGGGGTCGGGGGTCT#....(((((((..(.(((((((#))))))).).))))))).	912	930	1	-24.5	0	0.00100654	0.456	0	0	-14.9179	15	18	7	3UTR		0	0
hsa-miR-193b-3p	XM_047434413	PGAP6	AACTGGCCCTCAAAGTCCCGCT#GGTGGGGCTGTGTGCTCTGCTGGCCTGTGGGTGGCTAGA#..((((((((((.(((((((((#)))))))))..................)))).)))))).	2707	2746	1	-24.7	1	5.767714e-05	0.368	0	0	-6.24613	19	39	9	3UTR		0	0
hsa-miR-193b-3p	XM_047434445	SCNN1B	AACTGGCCCTCAAAGTCCCGCT#GGCGGGTGGGCCATGTG#.((((((((.......((((((#)))))).)))))).)).	2307	2324	1	-21.1	1	4.368455e-07	0.368	0	0	-14.3219	14	17	6	3UTR		0	0
hsa-miR-193b-3p	XM_047434511	SLC6A2	AACTGGCCCTCAAAGTCCCGCT#GAGGGATTTTGAGTAGAAACATTCATAGTTAATTTTCACTCTGGCCAA#...((((((((((((((((.(.#).))))))))))).............................))))).	2453	2501	1	-23.2	0	0.00618231	0.632	0	0	-6.51454	17	48	11	3UTR		0	0
hsa-miR-193b-3p	XM_047434584	UBE2I	AACTGGCCCTCAAAGTCCCGCT#AGCCTGGTCTGCCCAGCTGGCTCCGGGGCGAGCGTGAGGGCCAGG#..((((((((((..((((((..#.)))))).....)))))))))).	4667	4712	1	-32.5	1	1.057045e-06	0.324	0	0	-7.10297	16	23	10	3UTR		0	0
hsa-miR-193b-3p	XM_047435111	KIAA0040	AACTGGCCCTCAAAGTCCCGCT#GGTGGGATGCAGAGGTAACAGA#..(((..((((...((((((((#))))))))...))))...))).	1941	1963	1	-21.8	0	0.106715	0.559	0	0	-13.8944	15	22	8	3UTR		0	0
hsa-miR-193b-3p	XM_047435112	BAIAP2	AACTGGCCCTCAAAGTCCCGCT#GGCGGGCCAGGAGGGCAGTTG#((((.((((((...(.((((((#)))))))...)))))))))).	2891	2912	1	-26.5	0	5.528242e-05	0.353	0	0	-13.7824	17	21	10	3UTR		0	0
hsa-miR-193b-3p	XM_047435224	POLG2	AACTGGCCCTCAAAGTCCCGCT#GGTGGGGTTTTACCATGTTGGCCAGG#..((((((..((((((((((((#)))))))))).....))..)))))).	4287	4313	1	-22.4	1	0.00111258	0.529	0	0	-7.2559	18	26	10	3UTR		0	0
hsa-miR-193b-3p	XM_047435277	TMC6	AACTGGCCCTCAAAGTCCCGCT#AGAGGGACTTGGAGGGGAGACATATCAGTTG#(((((((((((.(((((((.((#)).))))))).)))))........)))))).	2133	2164	1	-25.5	1	0.00291157	0.515	0	0	-7.28438	20	31	7	3UTR		0	0
hsa-miR-193b-3p	XM_047435545	ARHGAP27	AACTGGCCCTCAAAGTCCCGCT#GGCTGGCTGTGGGCCAGTTT#(((((((((....((.((.(((#))).))))..))))))))).	3348	3368	1	-23.3	1	6.741103e-06	0.353	0	0	-12.8738	16	20	9	3UTR		0	0
hsa-miR-193b-3p	XM_047435712	WBP2	AACTGGCCCTCAAAGTCCCGCT#GCTGGGGCTTGGGGAGGGGAGGGGGCGCCTTGTTCTCCCTCCAGG#..(((((((((.(((((((((.#)).)))))))...)))))......................)))).	810	855	1	-24.1	1	0.00100915	0.441	0	0	-8.3038	18	45	7	3UTR		0	0
hsa-miR-193b-3p	XM_047436067	ARRB2	AACTGGCCCTCAAAGTCCCGCT#GGTTGGGAGAGGTGAGGGCAGG#..((.(((((((...(((((((#))).))))....))))))))).	1376	1398	1	-22.9	0	0.0714662	0.441	0	0	-11.9575	16	22	9	3UTR		0	0
hsa-miR-193b-3p	XM_047436128	MYH10	AACTGGCCCTCAAAGTCCCGCT#GGGGCTTTGGAAAGAGTAGGAGGGGTGGGCTGGA#..(((((((((((((((((...#))))))))))................))))))).	7027	7061	1	-24.8	1	0.022266	0.456	0	0	-4.957	17	34	10	3UTR		0	0
hsa-miR-193b-3p	XM_047436162	PAFAH1B1	AACTGGCCCTCAAAGTCCCGCT#AGTGGGGTGGGGGGAGGGCAAGC#..((.((((((....(((((((#)))))))......)))))).)).	4909	4932	1	-22.4	0	0.0093069	0.485	0	0	-15.3043	15	23	7	3UTR		0	0
hsa-miR-193b-3p	XM_047436163	PAFAH1B1	AACTGGCCCTCAAAGTCCCGCT#AGTGGGGTGGGGGGAGGGCAAGC#..((.((((((....(((((((#)))))))......)))))).)).	4991	5014	1	-22.4	0	0.0093069	0.485	0	0	-15.3043	15	23	7	3UTR		0	0
hsa-miR-193b-3p	XM_047436164	PAFAH1B1	AACTGGCCCTCAAAGTCCCGCT#AGTGGGGTGGGGGGAGGGCAAGC#..((.((((((....(((((((#)))))))......)))))).)).	4906	4929	1	-22.4	0	0.0093069	0.485	0	0	-15.3043	15	23	7	3UTR		0	0
hsa-miR-193b-3p	XM_047436310	PIMREG	AACTGGCCCTCAAAGTCCCGCT#CGGGTCTGATCTTGTGTAGCTCAGGCTGGGAGGGCCC#....(((((((..((((..(((#.)))...))))..))))))).	992	1029	1	-23.2	0	8.478196e-09	0.368	0	0	-14.1825	14	21	7	3UTR		0	0
hsa-miR-193b-3p	XM_047436310	PIMREG	AACTGGCCCTCAAAGTCCCGCT#GGTGCCAAGGCTCTTGAGGGCCC#....(((((((((((((.((((#))))....)))).))))))))).	1826	1849	1	-22.4	0	3.536654e-06	0.397	0	0	-9.54656	17	23	9	3UTR		0	0
hsa-miR-193b-3p	XM_047436311	PIMREG	AACTGGCCCTCAAAGTCCCGCT#GGTGCCAAGGCTCTTGAGGGCCC#....(((((((((((((.((((#))))....)))).))))))))).	1502	1525	1	-22.4	0	3.536654e-06	0.397	0	0	-9.54656	17	23	9	3UTR		0	0
hsa-miR-193b-3p	XM_047436346	VPS53	AACTGGCCCTCAAAGTCCCGCT#TGGGACTAGTAAGGGGTCGGC#..((((((((...(((((((..#))))))).....)))))))).	5848	5869	1	-23	1	0.000146369	0.485	0	0	-12.4177	15	21	8	3UTR		0	0
hsa-miR-193b-3p	XM_047436389	PRKCA	AACTGGCCCTCAAAGTCCCGCT#GGGGAGACTGAGGCAGGTGGATCACTTGAGGCCAGG#..((((.((((.((((.(((((#.)))))...)))))))))))).	3461	3497	1	-22	0	0.000294399	0.426	0	0	-9.84749	17	22	12	3UTR	MIRT041382	0	0
hsa-miR-193b-3p	XM_047436423	PSMC5	AACTGGCCCTCAAAGTCCCGCT#AGCTCGACGGCTTTGAGGCCAC#...(((.((((((((((..(((#))).....))))))))))))).	911	933	1	-20	0	0.000204423	0.442	0	0	-8.05823	16	22	13	3UTR	MIRT041377	0	0
hsa-miR-193b-3p	XM_047436435	PLXDC1	AACTGGCCCTCAAAGTCCCGCT#GGGACTGAGGGCACCCAGC#..(((((((((..((((((...#))))))))))))...))).	5807	5826	1	-24.2	1	3.709826e-07	0.574	0	0	-9.59293	15	19	12	3UTR		0	0
hsa-miR-193b-3p	XM_047436713	CARD14	AACTGGCCCTCAAAGTCCCGCT#GCCCCTTCCCGGGACTGTGGGGGCTT#....((((((((.(((((((..#.))))))).)))))))).	3496	3522	1	-28.2	0	2.122827e-08	0.397	0	0	-10.8357	15	18	8	3UTR		0	0
hsa-miR-193b-3p	XM_047436715	CARD14	AACTGGCCCTCAAAGTCCCGCT#GCCCCTTCCCGGGACTGTGGGGGCTT#....((((((((.(((((((..#.))))))).)))))))).	3514	3540	1	-28.2	0	2.122827e-08	0.397	0	0	-10.8357	15	18	8	3UTR		0	0
hsa-miR-193b-3p	XM_047437092	RECQL5	AACTGGCCCTCAAAGTCCCGCT#GCCAGGGGCTGGGGTCCAGG#..((((((((...((((((((.#))..)))))))))).)))).	2679	2699	1	-23.6	1	1.557426e-06	0.368	0	0	-12.4177	16	20	10	3UTR		0	0
hsa-miR-193b-3p	XM_047437095	ORMDL3	AACTGGCCCTCAAAGTCCCGCT#AGCTTCTCTGCAACCCACCGTGGGTCCTGGTTGGGAGTGGGGAGGGTCAGG#..(((((((((..(.(((((((#.))).)))).)...))))))))).	1056	1107	1	-26.7	1	0.0187204	0.397	0	0	-10.3284	17	24	9	3UTR		0	0
hsa-miR-193b-3p	XM_047437702	EPG5	AACTGGCCCTCAAAGTCCCGCT#AGCAGGGCCAGGGCTAGG#..((((((((....((((.(((#))).)))).)))))))).	11605	11623	1	-22.1	1	0.000505899	0.397	0	0	-13.2745	15	18	8	3UTR		0	0
hsa-miR-193b-3p	XM_047437750	MPPE1	AACTGGCCCTCAAAGTCCCGCT#TGGGAACCCAGTGAGCCAGGGGCCAGTTT#((((((((((((...(((((..#)))))......))).....))))))))).	1454	1483	1	-22.5	1	0.00052046	0.5	0	0	-6.81899	17	29	9	3UTR		0	0
hsa-miR-193b-3p	XM_047438118	NACC1	AACTGGCCCTCAAAGTCCCGCT#AGGGGGATTTTAGGAGATGGGGTGGGGGCCAGC#..(((((((((((((((((.((#)).)))))))............)))))))))).	3444	3477	1	-29.8	1	5.950725e-05	0.412	0	0	-4.957	19	33	10	3UTR		0	0
hsa-miR-193b-3p	XM_047438118	NACC1	AACTGGCCCTCAAAGTCCCGCT#GGGGGGCTGGGGGGCAGG#..(((.(((((..((((((.(.#).))))))))))).))).	2933	2951	1	-27	0	0.000121158	0.368	0	0	-11.4939	15	18	11	3UTR		0	0
hsa-miR-193b-3p	XM_047438409	FCGRT	AACTGGCCCTCAAAGTCCCGCT#GGGGGACTGAATGGCGGCTGGG#..((((((.(((.((((((.(.#).))))))...))).)))))).	1220	1242	1	-23.5	1	0.00113707	0.429	0	0	-7.30252	16	22	6	3UTR		0	0
hsa-miR-193b-3p	XM_047438533	PIP5K1C	AACTGGCCCTCAAAGTCCCGCT#AGCGGAAGTGTGGGGGCCAGA#..((((((((((.(.(.(((((#))))).).).)))))))))).	3602	3623	1	-28.5	1	0.000393616	0.353	0	0	-6.98158	17	21	10	3UTR	MIRT041364	0	0
hsa-miR-193b-3p	XM_047438714	STRN4	AACTGGCCCTCAAAGTCCCGCT#GGTGGGGCTGAGGGGACTCCCAGC#..(((((((((..(((((((((#)))))))))))))).....)))).	2413	2437	1	-26.5	1	7.613051e-08	0.279	0	0	-9.59293	18	24	14	3UTR		0	0
hsa-miR-193b-3p	XM_047438794	KCNN4	AACTGGCCCTCAAAGTCCCGCT#GGCTGGGGCGGGGCTGGA#..((((((((....((((((((#))).))))))))))))).	1127	1145	1	-23.1	1	3.437642e-06	0.353	0	0	-13.2745	16	18	13	3UTR		0	0
hsa-miR-193b-3p	XM_047439020	CC2D1A	AACTGGCCCTCAAAGTCCCGCT#GGGGCGTCGACCTGGCCCAGCTGGGTCCCCAGGGCCAGC#..((((((((....(.((((((#.))).))).)...)))))))).	2215	2254	1	-24.3	1	1.518967e-09	0.353	0	0	-13.5076	15	22	8	3UTR		0	0
hsa-miR-193b-3p	XM_047439070	PRKACA	AACTGGCCCTCAAAGTCCCGCT#GGGGGGGTGGGAGGGTTGGA#..(((((((((..(.((((.(.#).)))).)..))))))))).	957	977	1	-25.1	1	8.933513e-06	0.471	0	0	-10.3284	15	20	9	3UTR		0	0
hsa-miR-193b-3p	XM_047439454	PODNL1	AACTGGCCCTCAAAGTCCCGCT#GGCTGGTATGAAGGGGGCAGGGGACTCTCAGAGAGGTTGGGGGCTGGC#..((((((((((((((((((((#.)))..))))))..........))))))))))).	1940	1988	1	-27.5	1	3.230864e-05	0.294	0	0	-4.957	20	34	11	3UTR		0	0
hsa-miR-193b-3p	XM_047439454	PODNL1	AACTGGCCCTCAAAGTCCCGCT#GGCAGGGGACTCTCAGAGAGGTTGGGGGCTGGC#..((((((((((((((((((((#)))..))))))..........))))))))))).	1955	1988	1	-27.1	1	3.230864e-05	0.294	0	0	-4.957	20	33	11	3UTR		0	0
hsa-miR-193b-3p	XM_047439648	YIF1B	AACTGGCCCTCAAAGTCCCGCT#GTGGGACTGTGGGGCCGAGG#..(((((((.((.((((((((.#)))))))).))))))).)).	1448	1468	1	-29.3	1	9.551843e-05	0.353	0	0	-7.48864	17	20	8	3UTR		0	0
hsa-miR-193b-3p	XM_047439837	POLR3F	AACTGGCCCTCAAAGTCCCGCT#GGTGGGGCTTTTGGTAAGTGATAGGTCAGG#..((((((((.(((((((((((#))))))))))).)).........)))))).	1799	1829	1	-24.4	1	0.0127799	0.529	0	0	-7.78178	19	30	11	3UTR		0	0
hsa-miR-193b-3p	XM_047439940	ASXL1	AACTGGCCCTCAAAGTCCCGCT#TGGGGAGTTGATGGCCAGG#..((((((.((((..(((((..#)))))..)))).)))))).	5262	5281	1	-23.3	1	0.000955911	0.544	0	0	-7.60568	15	19	6	3UTR	MIRT041588	0	0
hsa-miR-193b-3p	XM_047439966	EPB41L1	AACTGGCCCTCAAAGTCCCGCT#GGTGGGAGGGGAGGGCGGA#...(.((((((....(((((((#)))))))...)))))).).	4902	4921	1	-25.2	0	0.0112011	0.426	0	0	-16.8618	14	19	7	3UTR		0	0
hsa-miR-193b-3p	XM_047439978	EPB41L1	AACTGGCCCTCAAAGTCCCGCT#GGTGGGAGGGGAGGGCGGA#...(.((((((....(((((((#)))))))...)))))).).	4680	4699	1	-25.2	0	0.0112011	0.426	0	0	-16.8618	14	19	7	3UTR		0	0
hsa-miR-193b-3p	XM_047440259	FERMT1	AACTGGCCCTCAAAGTCCCGCT#GGTGGGTTTTGAGAAGGTCAA#...((((((((((((.((((((#)))))))))))))..))))).	3750	3771	1	-22.8	0	0.00172401	0.574	0	0	-6.74759	18	21	13	3UTR		0	0
hsa-miR-193b-3p	XM_047440600	ENTPD6	AACTGGCCCTCAAAGTCCCGCT#GGCCCCTGGGGGCTGGGGCTGGTG#.(((((((((...((((((...#.))))))))))))))).	2413	2437	1	-24.8	1	1.824069e-07	0.25	0	0	-11.254	15	17	15	3UTR		0	0
hsa-miR-193b-3p	XM_047440626	GINS1	AACTGGCCCTCAAAGTCCCGCT#AGGGGACAGTGAAATTGGGGCTAGA#..((((((((((..(((((.((#)))))))..))).....))))))).	1363	1388	1	-23.1	1	0.00411907	0.544	0	0	-7.10297	17	25	7	3UTR		0	0
hsa-miR-193b-3p	XM_047440627	GINS1	AACTGGCCCTCAAAGTCCCGCT#AGGGGACAGTGAAATTGGGGCTAGA#..((((((((((..(((((.((#)))))))..))).....))))))).	1225	1250	1	-23.1	1	0.00411907	0.544	0	0	-7.10297	17	25	7	3UTR		0	0
hsa-miR-193b-3p	XM_047440895	C21orf58	AACTGGCCCTCAAAGTCCCGCT#GGCGGGACTATGGAAGGGAGCAGG#..(((.((((((.(((((((((#))))))))).))..))))..))).	1302	1326	1	-26.9	0	0.00218064	0.324	0	0	-8.14709	18	24	9	3UTR		0	0
hsa-miR-193b-3p	XM_047440919	AGPAT3	AACTGGCCCTCAAAGTCCCGCT#GGGGGATGGGGCCGGC#..((((((((....(((((.(.#).))))))))))))).	4925	4941	1	-25.1	1	1.264734e-08	0.25	0	0	-13.2745	14	16	13	3UTR		0	0
hsa-miR-193b-3p	XM_047441253	RBFOX2	AACTGGCCCTCAAAGTCCCGCT#GCAGATTTTCCCCCAGATACTAGGAGGAAAGGGACTTTGGGGGGTGGG#..(((.(((((((((((((...#.))))))))))))).))).	5001	5049	1	-29.5	0	0.0261052	0.471	0	0	-6.85796	16	19	13	3UTR		0	0
hsa-miR-193b-3p	XM_047441553	MICALL1	AACTGGCCCTCAAAGTCCCGCT#GTGGGGCTGAATGTGGGCCCGGTG#.((((((((.((.((((((((.#))))))))...)).))))).))).	4278	4302	1	-28	1	3.52486e-05	0.441	0	0	-6.32496	18	24	8	3UTR		0	0
hsa-miR-193b-3p	XM_047441561	HPS4	AACTGGCCCTCAAAGTCCCGCT#GGGGCAGGGGTTAGTTC#((((((((((....(((((...#))))).)))))))))).	2865	2882	1	-21.2	1	0.000338636	0.471	0	0	-12.2551	15	17	10	3UTR		0	0
hsa-miR-193b-3p	XM_047441568	HPS4	AACTGGCCCTCAAAGTCCCGCT#TGGGATGTGTTTTGGGGGCAGGG#..((.(((((((((((((((..#))))))....))))))))).)).	3425	3448	1	-23.1	0	0.00578072	0.485	0	0	-9.07604	17	23	9	3UTR		0	0
hsa-miR-193b-3p	XM_047441584	HPS4	AACTGGCCCTCAAAGTCCCGCT#GGGGCAGGGGTTAGTTC#((((((((((....(((((...#))))).)))))))))).	1675	1692	1	-21.2	1	0.000338636	0.471	0	0	-12.2551	15	17	10	3UTR		0	0
hsa-miR-193b-3p	XM_047442567	TMEM164	AACTGGCCCTCAAAGTCCCGCT#AGCCTGCTTCCCTGGGGAACTCCTAGGGCTAGTC#.(((((((((...((((((...#.)))).))...))))))))).	1351	1385	1	-23.3	1	8.114617e-05	0.426	0	0	-11.254	15	21	9	3UTR	MIRT016431	0	0
hsa-miR-193b-3p	XM_047442962	STAMBP	AACTGGCCCTCAAAGTCCCGCT#GGTGGGTCTGGGGGCCAGC#..(((((((((..((.((((((#)))))).))))))))))).	2696	2715	1	-29.6	1	7.59866e-06	0.441	0	0	-9.82598	17	19	11	3UTR		0	0
hsa-miR-193b-3p	XM_047443119	CHRM3	AACTGGCCCTCAAAGTCCCGCT#GGAGGGAGGTGGGAGGGCCGC#...((((((((....((((.((#)).)))).....)))))))).	3913	3934	1	-24.1	0	5.142112e-05	0.397	0	0	-12.7428	14	21	8	3UTR		0	0
hsa-miR-193b-3p	XM_047443427	MTERF4	AACTGGCCCTCAAAGTCCCGCT#GTGGTGACCTCAGGGCCAGC#..((((((((....(((((((.#)))).)))...)))))))).	2006	2026	1	-25.7	1	3.424066e-07	0.397	0	0	-13.2745	15	20	8	3UTR		0	0
hsa-miR-193b-3p	XM_047443595	ERMAP	AACTGGCCCTCAAAGTCCCGCT#GGTTTTCCAGAGAAACAGAATCAATATATATTGGGGCAGGGGGGCGGTG#.((((.(((((...((((((..#.)))))).))))).)))).	2449	2498	1	-24.6	0	0.00985258	0.574	0	0	-11.1871	15	19	6	3UTR		0	0
hsa-miR-193b-3p	XM_047443869	LCLAT1	AACTGGCCCTCAAAGTCCCGCT#GTGGGGAGAGGGTCAGC#..(((((((((....((((((.#)))))).))))))))).	8628	8645	1	-25	1	0.00139293	0.515	0	0	-11.1852	15	17	9	3UTR		0	0
hsa-miR-193b-3p	XM_047443919	GGCX	AACTGGCCCTCAAAGTCCCGCT#AGTGGCTTTTTGGGGGCTGGG#..(((((((((((((..(((((#)))))..))))))))))))).	1754	1775	1	-26.1	1	4.728014e-05	0.456	0	0	-5.19005	18	21	13	3UTR		0	0
hsa-miR-193b-3p	XM_047444227	ANKRD36	AACTGGCCCTCAAAGTCCCGCT#AGCACTTTGGGAGGCCAGTG#.(((((((((((((((...(((#))))))))))).))))))).	8180	8200	1	-25.5	1	0.000187466	0.456	0	0	-3.79332	18	20	11	3UTR		0	0
hsa-miR-193b-3p	XM_047444687	CCSAP	AACTGGCCCTCAAAGTCCCGCT#GGATACAGAGGGCCGA#...((((((((...((((....#))))...)))))))).	4341	4357	1	-20.8	0	0.00113749	0.574	0	0	-12.0073	12	16	8	3UTR		0	0
hsa-miR-193b-3p	XM_047444820	KIF1A	AACTGGCCCTCAAAGTCCCGCT#AGTGGGGCACCTTGGGGCTAGC#..(((((((.(((.((((((((#))))))))...)))))))))).	6183	6205	1	-27.8	1	7.674968e-05	0.324	0	0	-7.05635	18	22	10	3UTR		0	0
hsa-miR-193b-3p	XM_047444938	SMPD4	AACTGGCCCTCAAAGTCCCGCT#GTGGGGTTTTGGGGGTTTGC#..(.(((((((((((((((((.#))))))))))))))))).).	3308	3328	1	-25.5	0	0.00146456	0.603	0	0	-7.98902	18	20	17	3UTR		0	0
hsa-miR-193b-3p	XM_047445087	MBD5	AACTGGCCCTCAAAGTCCCGCT#GGGATGAGGGCTCACAGG#..((((((((((...((((...#)))))))))))...))).	6756	6774	1	-21.6	1	0.00428853	0.588	0	0	-7.83842	14	18	11	3UTR		0	0
hsa-miR-193b-3p	XM_047445585	SOS1	AACTGGCCCTCAAAGTCCCGCT#GGACTTTATACTGGGCCAGC#..(((((((..(((((((....#))))))).....))))))).	5032	5052	1	-23.1	1	0.00287803	0.559	0	0	-9.02428	14	20	7	3UTR		0	0
hsa-miR-193b-3p	XM_047445644	TNS1	AACTGGCCCTCAAAGTCCCGCT#GGTCTTCTGAGACTGGCCAGGAGAGGGATGGTGGGGCCAGTG#.((((((((.((..(((((.((#.)).)))))..)))))))))).	9078	9120	1	-29.4	1	0.00112051	0.368	0	0	-7.1818	17	22	10	3UTR		0	0
hsa-miR-193b-3p	XM_047446104	AGPS	AACTGGCCCTCAAAGTCCCGCT#AGTGGGAGAGGGTAAGTC#.(((.((((((....(((((((#))))))))))))).))).	6508	6526	1	-22.5	0	0.000582402	0.603	0	0	-14.1406	16	18	13	3UTR		0	0
hsa-miR-193b-3p	XM_047446434	CHST10	AACTGGCCCTCAAAGTCCCGCT#AGGGGAGGCTTTTTCTACCTGAGAAGGGGAGTGTCTTTGAGGGCCT#....(((((((((((((((.((#.))))))....))))))))))).	2433	2479	1	-27.2	0	0.00036005	0.456	0	0	-9.54656	17	23	11	3UTR		0	0
hsa-miR-193b-3p	XM_047446457	TTLL4	AACTGGCCCTCAAAGTCCCGCT#GGCTTCTGGGGCAGTCCAGTGCTGCTGAGGGCCAGTG#.(((((((((((..((((((..#.)))))).............))))))))))).	7128	7165	1	-28.4	1	3.609096e-05	0.426	0	0	-5.9393	17	32	11	3UTR		0	0
hsa-miR-193b-3p	XM_047446890	BROX	AACTGGCCCTCAAAGTCCCGCT#AGCTTATGCTTACTGTTACCATGGTGAGACTTTATTGGCTAGTG#.(((((((...((((((.((((#.)))).))))))...))))))).	791	835	1	-21.8	1	0.00334979	0.574	0	0	-8.917	17	23	7	3UTR		0	0
hsa-miR-193b-3p	XM_047447361	ADCY5	AACTGGCCCTCAAAGTCCCGCT#AGTGGGAGGGGGCAGTTA#(((((.((((.....(((((((#))))))))))).))))).	4309	4327	1	-23.9	0	0.00363535	0.662	0	0	-14.8915	16	18	11	3UTR		0	0
hsa-miR-193b-3p	XM_047447363	ADCY5	AACTGGCCCTCAAAGTCCCGCT#AGTGGGAGGGGGCAGTTA#(((((.((((.....(((((((#))))))))))).))))).	4311	4329	1	-23.9	0	0.00363535	0.662	0	0	-14.8915	16	18	11	3UTR		0	0
hsa-miR-193b-3p	XM_047447393	OSBPL10	AACTGGCCCTCAAAGTCCCGCT#GTGGGCCACAAGGGCTAGTC#.(((((((((....(.(((((.#))))))....))))))))).	2463	2483	1	-23.9	1	0.000107195	0.412	0	0	-12.3439	15	20	9	3UTR		0	0
hsa-miR-193b-3p	XM_047448180	MST1R	AACTGGCCCTCAAAGTCCCGCT#AGTGGTGCGGCCAGGGCCAGA#..((((((((....((.(((((#))))).))....)))))))).	3265	3286	1	-24.7	1	1.467566e-05	0.396	0	0	-13.2745	15	21	8	3UTR		0	0
hsa-miR-193b-3p	XM_047448216	OPA1	AACTGGCCCTCAAAGTCCCGCT#GGAGGGAGATCTTCATTTCTTTGAGGAGATCAGTA#.((((((((((((((((((.((#)).))))...........)))))))).).))))).	4126	4161	1	-21.5	1	0.00403892	0.647	0	0	-3.79332	20	35	8	3UTR		0	0
hsa-miR-193b-3p	XM_047448553	IFT122	AACTGGCCCTCAAAGTCCCGCT#GGTGGGGCTAGGGACAGA#..(((.((((...(((((((((#))))))))))))).))).	2655	2673	1	-23.4	0	0.0014478	0.529	0	0	-14.3187	16	18	13	3UTR		0	0
hsa-miR-193b-3p	XM_047448554	IFT122	AACTGGCCCTCAAAGTCCCGCT#GTGGGGGGGGCCTTGTG#.((.(((((((.....(((((.#))))))))))))..)).	2606	2623	1	-21.8	0	1.956747e-05	0.529	0	0	-13.2866	14	17	12	3UTR		0	0
hsa-miR-193b-3p	XM_047448660	EEFSEC	AACTGGCCCTCAAAGTCCCGCT#AGGGGGATGGGTTGCTGGGGCCAGG#..(((((((((((.(((((.((#)).)))))...)))..)))))))).	1656	1681	1	-27.3	1	5.527753e-06	0.324	0	0	-5.81384	18	25	8	3UTR	MIRT041486	0	0
hsa-miR-193b-3p	XM_047448834	NR2C2	AACTGGCCCTCAAAGTCCCGCT#AGAGTGACCATGAGGGCCATGTTG#((((((((((((..(((.(.((#)).).)))..))))))))).))).	4187	4211	1	-23.3	1	0.00112787	0.515	0	0	-6.08354	18	24	9	3UTR		0	0
hsa-miR-193b-3p	XM_047448898	CRELD1	AACTGGCCCTCAAAGTCCCGCT#TGGGAAATTGAGGGCTT#....(((((((((..(((((..#)))))..))))))))).	2006	2023	1	-23.7	0	0.00010917	0.574	0	0	-11.1389	14	17	9	3UTR		0	0
hsa-miR-193b-3p	XM_047448917	CEP97	AACTGGCCCTCAAAGTCCCGCT#TGGGAGGCTGAGGCCAGA#..((((.(((((...(((((..#)))))...))))))))).	5389	5407	1	-22	0	2.583842e-05	0.456	0	0	-9.38211	14	18	9	3UTR		0	0
hsa-miR-193b-3p	XM_047448959	ZNF385D	AACTGGCCCTCAAAGTCCCGCT#GGTGGGGTTTGATGCAGCCAGTC#.((((((..(((((.(((((((#))))))))))))....)))))).	3534	3557	1	-22.8	1	3.35204e-06	0.603	0	0	-7.8988	18	23	12	3UTR		0	0
hsa-miR-193b-3p	XM_047449146	GMPS	AACTGGCCCTCAAAGTCCCGCT#GGCGGATCTCTTGAGGTCAGG#..((((.((((((((..(((((#)))))..)).)))))))))).	7713	7734	1	-22.4	0	7.268631e-05	0.382	0	0	-6.73374	17	21	10	3UTR		0	0
hsa-miR-193b-3p	XM_047449171	SEC22C	AACTGGCCCTCAAAGTCCCGCT#GGTGGGACTGTTTGGGTACAGA#..(((((((....(((((((((#)))))))))....)))).))).	1730	1752	1	-25.4	1	0.000107543	0.662	0	0	-13.6602	16	22	9	3UTR		0	0
hsa-miR-193b-3p	XM_047449269	DCAF1	AACTGGCCCTCAAAGTCCCGCT#GGAAGGAAGTGGTTGAGGGCCAGG#..(((((((((((....(((((#.)))))))))))))))).	5447	5471	1	-27.5	1	0.0011603	0.5	0	0	-6.78234	16	18	16	3UTR		0	0
hsa-miR-193b-3p	XM_047449470	CLSTN1	AACTGGCCCTCAAAGTCCCGCT#GGCTGGGAGTCGGGGGCCAC#...((((((((..(.(((((((#))).)))).).)))))))).	4328	4348	1	-25.4	0	6.616755e-08	0.382	0	0	-11.8859	16	20	8	3UTR	MIRT016329	1	1
hsa-miR-193b-3p	XM_047449505	ANAPC10	AACTGGCCCTCAAAGTCCCGCT#AGTTGGAGAGCCTGCAGGAAGATCTAAGGGAATGAGGGTCAGTTG#((((((((((((...((((...#.)))).)))))))))))).	18647	18692	1	-27.3	1	0.000297205	0.441	0	0	-6.81899	16	19	12	3UTR		0	0
hsa-miR-193b-3p	XM_047449505	ANAPC10	AACTGGCCCTCAAAGTCCCGCT#GGTGGGAGTTGGGGGGAAGGA#..((..(((((.((.(((((((#))))))).)).)))))..)).	9711	9732	1	-24.8	0	0.434684	0.485	0	0	-15.0592	16	21	7	3UTR		0	0
hsa-miR-193b-3p	XM_047449529	PAICS	AACTGGCCCTCAAAGTCCCGCT#GTGGGACTTCACCTCCATTTTGCAGAGCCAA#...((((.(((((((((((((.#)))))))))...........)).)).)))).	5954	5985	1	-21	0	0.00607362	0.559	0	0	-8.82818	17	31	9	3UTR		0	0
hsa-miR-193b-3p	XM_047449578	SCMH1	AACTGGCCCTCAAAGTCCCGCT#GGAGGGAGAGTGGGGGTCCAGG#..((((((((((...((((.((#)).))))...)))))).)))).	2724	2746	1	-26	1	0.00153584	0.368	0	0	-7.83842	16	22	6	3UTR		0	0
hsa-miR-193b-3p	XM_047449736	ELF2	AACTGGCCCTCAAAGTCCCGCT#AGTGGGAGGGGTTGGG#..((((((((.....(((((((#))))))))))))))).	2430	2446	1	-20.5	1	0.0124399	0.603	0	0	-14.01	15	16	15	3UTR		0	0
hsa-miR-193b-3p	XM_047450140	GRSF1	AACTGGCCCTCAAAGTCCCGCT#GGTGGGTCACTTGAGGTCAGG#..((((.((((((.(.((((((#)))))).)..)))))))))).	3776	3797	1	-22.4	0	0.000213556	0.529	0	0	-7.59058	17	21	10	3UTR		0	0
hsa-miR-193b-3p	NM_152437	ZNF664	AACTGGCCCTCAAAGTCCCGCT#GGTGGGGTGGGGTGGGGGTGGGG#..((.(((((((..((((((((#))))))))....))))))).)).	3056	3079	1	-24.6	0	0.103594	0.412	1.48282	1.61366	-11.222	17	23	8	3UTR		0	0
hsa-miR-193b-3p	NM_152444	PTGR2	AACTGGCCCTCAAAGTCCCGCT#GGTATGATGTGTACATAGGGACTGGGGGCAGG#..(((.((((...((((((...#.)))))))))).))).	1785	1817	1	-23.2	0	0.00171842	0.515	0.7043753833333333	0.5671871637499999	-14.3187	13	16	10	3UTR		0	0
hsa-miR-193b-3p	NM_152450	FAM81A	AACTGGCCCTCAAAGTCCCGCT#AGTGGGGCTAGGAGCCGGA#..((((((((...(((((((((#)))))))))))).))))).	1318	1337	1	-26.1	1	2.759945e-05	0.456	0.2607163888888889	0.283596	-12.4177	17	19	12	3UTR		0	0
hsa-miR-193b-3p	NM_152450	FAM81A	AACTGGCCCTCAAAGTCCCGCT#GTGGGGTCTTTGAGGAGAAGGA#..((..(((((((((((((((.#)))))).)))))))).)..)).	3003	3025	1	-24.9	0	0.00275866	0.485	0	0	-10.977	17	22	8	3UTR		0	0
hsa-miR-193b-3p	NM_152464	TMEM199	AACTGGCCCTCAAAGTCCCGCT#GACTTTGGGGGCTTCAGG#..(((((((((((((((.....#))))))))))))..))).	679	697	1	-23.9	1	3.050664e-06	0.515	0.08645579823529415	1.4540196784999997	-4.957	15	18	12	3UTR		0	0
hsa-miR-193b-3p	NM_152465	PROCA1	AACTGGCCCTCAAAGTCCCGCT#GCGGGGCAAGGGGTGGGCTCAGG#..(((((((((...(((((((.#)))))))....)).)))).))).	1329	1352	1	-26.7	1	0.000168586	0.397	0.5340336181818183	0.5411880149999999	-10.4498	16	23	7	3UTR		0	0
hsa-miR-193b-3p	NM_152470	RNF165	AACTGGCCCTCAAAGTCCCGCT#AGCTGTTTGGGGGACAAGAGAGGGCCAGG#..(((((((((...(((((.(.#.).)))))....))))))))).	4345	4374	1	-31.4	1	0.000114627	0.368	0.41645408444444443	-0.0974829	-10.4498	15	22	9	3UTR		0	0
hsa-miR-193b-3p	NM_152485	C1orf74	AACTGGCCCTCAAAGTCCCGCT#AGTTGGGCTTTGATGGACGAGCCAGTG#.(((((((((((((((((.(((#))).))))))))).))....)))))).	2243	2270	1	-26.2	1	0.000497118	0.574	1.2616599454545454	0.8834022949999998	-3.79332	20	27	9	3UTR		0	0
hsa-miR-193b-3p	NM_152531	XXYLT1	AACTGGCCCTCAAAGTCCCGCT#GTGGGCTTGGAAGACATGTCACTCATGGGCTAGTA#.((((((((((.(((.(((((.#)))))))).))...............)))))))).	2449	2484	1	-23.4	1	3.611058e-05	0.603	3.4962808000000005	2.3543780237500003	-7.37318	18	35	8	3UTR		0	0
hsa-miR-193b-3p	NM_152540	SCFD2	AACTGGCCCTCAAAGTCCCGCT#TGTGGACTTTGTGGGTATGAGTTT#((((.((((.((((((((((..#)).)))))))).))))...)))).	2940	2964	1	-21	0	0.10935	0.632	2.7776345454545455	2.6294890875000005	-9.29912	18	24	8	3UTR		0	0
hsa-miR-193b-3p	NM_152542	PPM1K	AACTGGCCCTCAAAGTCCCGCT#AGCACTTTGAGAGGCCAA#...(((((((((((((...(((#))))))))))).))))).	1940	1958	1	-22	0	0.000970647	0.485	0.1789044214285715	0.6517213562499999	-6.51454	16	18	11	3UTR		0	0
hsa-miR-193b-3p	NM_152551	SNRNP48	AACTGGCCCTCAAAGTCCCGCT#GGTGCAAATCAGGATTGGGAGGGTGGTCAGA#..(((((((((..(((((....#.)))))..))))))...))).	1832	1863	1	-19.8	1	0.00215261	0.574	0.23009462499999997	0.07938500124999996	-9.59293	14	21	6	3UTR		0	0
hsa-miR-193b-3p	NM_152557	ZNF746	AACTGGCCCTCAAAGTCCCGCT#GGCTGGGTTTGGGGGCCAAGTG#.(((((((((((((..((((((#))).)))))))))))))).)).	3450	3472	1	-26.8	1	2.305676e-06	0.441	1.4650184999999998	1.9598213674999996	-4.76182	19	22	14	3UTR		0	0
hsa-miR-193b-3p	NM_152615	PARP15	AACTGGCCCTCAAAGTCCCGCT#GGCATGAATACTCCACTGGCAAGGATCATTGGGGGCCAT#...((((((((((.((((.(((#.)))..))))..)))))))))).	2425	2464	1	-24.5	0	0.00290279	0.515	-0.0282881	0.14108	-7.37138	17	23	10	3UTR	MIRT608243	0	0
hsa-miR-193b-3p	NM_152627	CDC14C	AACTGGCCCTCAAAGTCCCGCT#GGCTGGATTTTGGGGGGCT#....(.((((((((((((.(((#))).)))))))))))).).	2235	2254	1	-25.7	0	0.000439089	0.529	0.13731968333333333	0.10553251559999999	-11.4475	16	19	12	3UTR		0	0
hsa-miR-193b-3p	NM_152647	FAM227B	AACTGGCCCTCAAAGTCCCGCT#GCGGGGTTTTTAGGTGTCAT#...(((((((.((((((((((.#)))))))))).))).)))).	2442	2462	1	-21.5	0	0.00303446	0.691	2.81934	1.7752797287500002	-9.33931	17	20	10	3UTR		0	0
hsa-miR-193b-3p	NM_152667	NANP	AACTGGCCCTCAAAGTCCCGCT#AGTGGGGTTGAGGGAGCTAGG#..(((((((((((..(((((((#)))))))))))))..))))).	1606	1627	1	-23.9	1	0.00010357	0.5	0.02093843076923075	0.275036	-6.54929	18	21	13	3UTR		0	0
hsa-miR-193b-3p	NM_152687	GAPT	AACTGGCCCTCAAAGTCCCGCT#GAGGGACATGGGTTGGTG#.((((((((.....(((((.(.#).)))))..)))))))).	2336	2354	1	-19.3	1	0.00962369	0.544	0.0007520000000000096	-0.00430523	-13.3534	14	18	8	3UTR		0	0
hsa-miR-193b-3p	NM_152713	STT3A	AACTGGCCCTCAAAGTCCCGCT#GTGGGACCAGAAGAGTGCTAGA#..(((((.(((...(((((((.#))))))).....))).))))).	2740	2762	1	-22.3	0	0.000604626	0.588	1.0872335142857141	0.3759748262500001	-12.7634	15	22	7	3UTR		0	0
hsa-miR-193b-3p	NM_152833	TMEM250	AACTGGCCCTCAAAGTCCCGCT#GGTGGGACGGGAGGCGGGAGGGGGCTGGTG#.((((((((((....(((((((#.))))))))))))))))).	2657	2687	1	-28.8	1	7.264372e-05	0.279	0.6360431999999999	0.4816726299999999	-10.0215	17	19	17	3UTR		0	0
hsa-miR-193b-3p	NM_152880	PTK7	AACTGGCCCTCAAAGTCCCGCT#GGGCTTTGAGCTGGGCAGTTT#(((((.((((((((((((....#))))))))))..)).))))).	3479	3500	1	-24.2	0	0.000458554	0.426	0.4089451357142857	0.614179	-5.83853	17	21	10	3UTR	MIRT041454	0	0
hsa-miR-193b-3p	NM_152881	PTK7	AACTGGCCCTCAAAGTCCCGCT#GGGCTTTGAGCTGGGCAGTTT#(((((.((((((((((((....#))))))))))..)).))))).	3209	3230	1	-24.2	0	0.000458554	0.426	0.4089451357142857	0.614179	-5.83853	17	21	10	3UTR	MIRT041454	0	0
hsa-miR-193b-3p	NM_152882	PTK7	AACTGGCCCTCAAAGTCCCGCT#GGGCTTTGAGCTGGGCAGTTT#(((((.((((((((((((....#))))))))))..)).))))).	3431	3452	1	-24.2	0	0.000458554	0.426	0.4089451357142857	0.614179	-5.83853	17	21	10	3UTR	MIRT041454	0	0
hsa-miR-193b-3p	NM_152906	TANGO2	AACTGGCCCTCAAAGTCCCGCT#AGCGGGAGGCAGGCTGGCCTGGACTTCTGTTGGATGATGGGGGCCAGG#..((((((((((..((((.((.#.)).))))..)))))))))).	2535	2583	1	-28.9	1	0.000270511	0.353	-0.445008	-0.428957	-7.10297	16	21	10	3UTR		0	1
hsa-miR-193b-3p	NM_152910	DGKH	AACTGGCCCTCAAAGTCCCGCT#AGTGGGATGGGGCCT#....((((((....((((((((#)))))))))))))).	6625	6640	1	-23.8	0	0.000140621	0.456	-0.02895	-0.469953	-17.8641	14	15	14	3UTR		0	0
hsa-miR-193b-3p	NM_152943	ZNF268	AACTGGCCCTCAAAGTCCCGCT#GGTGGATGACTTGAGGTCAGG#..((((.((((.((((((((((#)))))..))))))))))))).	8270	8291	1	-21.6	0	0.000275559	0.441	-0.516295	-0.012493	-9.84749	18	21	13	3UTR		0	0
hsa-miR-193b-3p	NM_153033	KCTD7	AACTGGCCCTCAAAGTCCCGCT#GGGACTGGATTCATCTTGCCTTGAGACGGGCCAGTA#.((((((((((((((((((...#))))))..............))))...)))))))).	3832	3868	1	-26.5	1	0.000716647	0.529	-0.163702	0.04623582375000001	-3.79332	18	36	8	3UTR		0	0
hsa-miR-193b-3p	NM_153035	TCEANC2	AACTGGCCCTCAAAGTCCCGCT#GGTTGGGCATAGCAGGGCCAGA#..(((((((((...((((.(((#))).))))...).)))))))).	6922	6944	1	-23.4	1	0.000274269	0.485	0.47222690000000006	0.25405324500000004	-10.4498	16	22	8	3UTR		0	0
hsa-miR-193b-3p	NM_153035	TCEANC2	AACTGGCCCTCAAAGTCCCGCT#TGGGAGGGGGTCAGG#..(((((((((....(((((..#)))))))))))))).	6000	6015	1	-22.2	1	0.000643796	0.559	-0.00903667	-0.114331	-11.1852	14	15	14	3UTR		0	0
hsa-miR-193b-3p	NM_153036	CALHM4	AACTGGCCCTCAAAGTCCCGCT#AGTATTTTGGGGGGGGGGGGGGCTAT#...((((((((....((((.((#.)).))))..)))))))).	3074	3100	1	-22.9	0	0.000319578	0.559	-1.0196	0.379055	-12.7428	14	19	8	3UTR		0	0
hsa-miR-193b-3p	NM_153045	TMEM268	AACTGGCCCTCAAAGTCCCGCT#GGTGGGGCTTTCAGGGTA#.....(((((.(((((((((((#))))))))))).))))).	3858	3876	1	-25.8	0	1.077565e-05	0.485	0.04970945454545457	-0.246312	-16.4904	16	18	11	3UTR		0	0
hsa-miR-193b-3p	NM_153050	MTMR3	AACTGGCCCTCAAAGTCCCGCT#AGGGGGCTGCTTTCCTGGGCCAGG#..(((((((..((((((((.((#)).)))..)))))...))))))).	4592	4616	1	-25.5	1	0.000192875	0.412	-0.197299	0.212914	-9.02428	17	24	7	3UTR		0	0
hsa-miR-193b-3p	NM_153051	MTMR3	AACTGGCCCTCAAAGTCCCGCT#AGGGGGCTGCTTTCCTGGGCCAGG#..(((((((..((((((((.((#)).)))..)))))...))))))).	4565	4589	1	-25.5	1	0.000192875	0.412	-0.263196	0.287049	-9.02428	17	24	7	3UTR		0	0
hsa-miR-193b-3p	NM_153213	ARHGEF19	AACTGGCCCTCAAAGTCCCGCT#GTGGCCTTGGCATTGAGGGCACAGG#..(((((((((((.(((((((.#))))....))).)))))))).))).	2698	2723	1	-26.3	1	0.000958835	0.368	1.1990665999999999	0.5583601225000002	-5.81384	18	25	8	3UTR		0	0
hsa-miR-193b-3p	NM_153221	CILP2	AACTGGCCCTCAAAGTCCCGCT#GCGGTGACTCTGGGGCCAGC#..(((((((.((.((((((((.#)))).)))).))))))))).	3769	3789	1	-30.7	1	2.675019e-07	0.397	-0.89548	-0.605593	-7.48864	17	20	9	3UTR		0	0
hsa-miR-193b-3p	NM_153234	LIX1	AACTGGCCCTCAAAGTCCCGCT#GCAGGGACAGGGATCAGA#..((((((((....(((((((.#)).))))))))).)))).	2907	2925	1	-20.4	1	0.00565078	0.574	2.3095670555555556	1.5198148124999997	-13.2745	15	18	9	3UTR		0	0
hsa-miR-193b-3p	NM_153235	TXLNB	AACTGGCCCTCAAAGTCCCGCT#AGTGGGAAAGGGGAGCTAGG#..(((((((((....(((((((#)))))))..)))).))))).	3124	3144	1	-23.9	1	0.0470903	0.471	1.92903	2.3663877949999987	-11.1852	16	20	7	3UTR		0	0
hsa-miR-193b-3p	NM_153260	LRRC57	AACTGGCCCTCAAAGTCCCGCT#GGAGTTTGAGGCCAGC#..((((.(((((((.(((....#))).))))))))))).	6441	6457	1	-23	0	0.00523816	0.456	5.466453571428572	4.822419229999999	-7.23614	14	16	11	3UTR		0	0
hsa-miR-193b-3p	NM_153262	SYT14	AACTGGCCCTCAAAGTCCCGCT#GTGGTGAATATAATATAGTGGCAACGATTTTGAGGAATCTTTAAAGCTGTTTGGAAGAGATGGCCAGC#..((((((((((((((((((((#.)))))....))))))))))...........................))))).	10278	10346	1	-23.4	1	0.000297341	0.632	0.860188890196078	0.554718	-4.957	20	53	10	3UTR		0	0
hsa-miR-193b-3p	NM_153270	KLHL34	AACTGGCCCTCAAAGTCCCGCT#AGCGGGGCGGGGGGTCAA#...((((((((...((((((((#)))))))).)))))))).	2659	2677	1	-28.4	0	0.00122561	0.485	2.20515	2.8346436500000003	-12.0073	16	18	8	3UTR		0	0
hsa-miR-193b-3p	NM_153271	SNX33	AACTGGCCCTCAAAGTCCCGCT#GGCAGGGGATACTCTGGGGCCAGA#..(((((((.((.(((((((((#))).)))...))).))))))))).	6724	6748	1	-25	1	3.402308e-06	0.382	-0.268085	-0.0824281	-7.48864	18	24	9	3UTR		0	0
hsa-miR-193b-3p	NM_153274	BEST4	AACTGGCCCTCAAAGTCCCGCT#GGTGGGAGAGAAGGTCGGTTG#((((((((.((....(((((((#)))))))..)).)))))))).	2075	2096	1	-22.8	1	0.0603405	0.515	0.10639007500000003	0.9829460949999999	-11.2222	17	21	8	3UTR		0	0
hsa-miR-193b-3p	NM_153446	B4GALNT2	AACTGGCCCTCAAAGTCCCGCT#GGGACCTGAGGCCAGTTG#((((((.(((((..(((((...#))))).))))))))))).	2766	2784	1	-26.1	0	0.000412012	0.515	-0.148937	-0.0170479	-7.62723	16	18	11	3UTR		0	0
hsa-miR-193b-3p	NM_153456	HS6ST3	AACTGGCCCTCAAAGTCCCGCT#AGTGGGATCATTTAGAGATGGGGGTTAGG#..((((((((((..((((((((#))))))))..........)))))))))).	7051	7080	1	-24.7	1	0.0484339	0.559	-0.319435	-0.0747344	-7.10297	18	29	10	3UTR		0	0
hsa-miR-193b-3p	NM_153487	MDGA1	AACTGGCCCTCAAAGTCCCGCT#GGTGAAAAGGACTCCGGGGGCCAGG#..(((((((((..(((((((((#))))....)))))..))))))))).	7110	7135	1	-28.6	1	4.124009e-05	0.441	2.890520769230769	4.42937	-9.59293	18	25	9	3UTR		0	0
hsa-miR-193b-3p	NM_153499	CAMKK2	AACTGGCCCTCAAAGTCCCGCT#GCATTTGAGAGGGAGTAGGGGGCTAGA#..(((((((((..(.((((.((#.)).)))).).))))))))).	2482	2509	1	-24.6	1	0.000374344	0.456	-0.21323	0.0703144	-10.3284	16	21	9	3UTR		0	0
hsa-miR-193b-3p	NM_153614	DNAJB13	AACTGGCCCTCAAAGTCCCGCT#GGTGGGATGGCGCAGGGCTT#....(((((((...((((((((#))))))))...).)))))).	1106	1126	1	-22.9	0	0.000114998	0.574	0.184088	0.3356983853205129	-15.0393	15	20	8	3UTR		0	0
hsa-miR-193b-3p	NM_153640	PANK2	AACTGGCCCTCAAAGTCCCGCT#AGTGAGGAAACCCGAGGGCCAA#...((((((((....(((((((#)))).))).....)))))))).	5462	5484	1	-24.1	0	0.00150781	0.5	1.68366	1.1018	-12.7428	15	22	8	3UTR		0	0
hsa-miR-193b-3p	NM_153647	SLC24A4	AACTGGCCCTCAAAGTCCCGCT#GGCTGGATTTGGGGGCCAT#...((((((((.((((((.(((#))).)))))))))))))).	2145	2164	1	-26.6	0	0.000683429	0.426	0.507188	-0.0337432	-9.86134	17	19	14	3UTR		0	0
hsa-miR-193b-3p	NM_153648	SLC24A4	AACTGGCCCTCAAAGTCCCGCT#GCAACATGTTGGTTGGGACTTGTCCACGGGCCAGG#..(((((((...((((((((((#.))).)))))))......))))))).	8320	8355	1	-27.2	1	0.000646595	0.544	-0.138962	-0.0996935	-12.3711	17	26	7	3UTR		0	0
hsa-miR-193b-3p	NM_153648	SLC24A4	AACTGGCCCTCAAAGTCCCGCT#GGCTGGATTTGGGGGCCAT#...((((((((.((((((.(((#))).)))))))))))))).	2003	2022	1	-26.6	0	0.000683429	0.426	0.31952	0.49237319250000006	-9.86134	17	19	14	3UTR		0	0
hsa-miR-193b-3p	NM_153698	PRXL2C	AACTGGCCCTCAAAGTCCCGCT#GGATTTTGGGGGGTTGGG#..((((((((((((((((....#)))))))))))).)))).	1517	1535	1	-21.1	1	0.00115306	0.588	-0.055893	0.09389125885000002	-4.957	16	18	12	3UTR		0	0
hsa-miR-193b-3p	NM_153702	ELMOD2	AACTGGCCCTCAAAGTCCCGCT#TGGGAGAAATTGGGGGTATCAGTG#.((((((((((((..(((((..#)))))....))))))))..)))).	3514	3538	1	-22.1	1	0.00368717	0.632	0.07094345928571433	0.7161873566249999	-5.38561	17	24	8	3UTR		0	0
hsa-miR-193b-3p	NM_153714	C10orf67	AACTGGCCCTCAAAGTCCCGCT#GGTGGCCTGAAGCCTGGGGGCCAGG#..((((((((((...(((((((#)))))...))....)))))))))).	2503	2528	1	-25.4	1	2.930531e-08	0.368	1.6207759000000004	0.9808301575000002	-7.83842	17	25	10	3UTR		0	0
hsa-miR-193b-3p	NM_153823	GSG1	AACTGGCCCTCAAAGTCCCGCT#AGCGGGTTTGGGGAGTAGG#..(((..(((((((..((((((#)))))))))))))..))).	1055	1074	1	-21.3	0	0.00701474	0.485	-0.062982	-0.142748	-9.37014	16	19	13	3UTR		0	0
hsa-miR-193b-3p	NM_153828	RTN4	AACTGGCCCTCAAAGTCCCGCT#AGGGGATATTCATTTGATTATACGGGGGAGGGTCAGG#..(((((((((....(((((..#.)))))))))))))).	1309	1346	1	-24.3	1	0.000876279	0.515	3.557646888888889	4.2793620274999995	-11.1852	14	16	14	3UTR		0	0
hsa-miR-193b-3p	NM_170679	SKP1	AACTGGCCCTCAAAGTCCCGCT#AGTTGGATTTGTTTGGGGGTGGACAGA#..((((((((((((((((.(((#))).))))...)))))))))...))).	5876	5903	1	-19.9	1	0.00021585	0.559	-0.443488	0.09539590374999998	-4.957	19	27	9	3UTR		1	0
hsa-miR-193b-3p	NM_170706	NMNAT2	AACTGGCCCTCAAAGTCCCGCT#GGGACCTTTGGAGGCCAT#...(((((.((((((((((...#))))).))))).))))).	2072	2090	1	-23.7	0	0.000367876	0.471	0.6070286272727273	0.41697344000000003	-7.57093	15	18	5	3UTR		0	0
hsa-miR-193b-3p	NM_170706	NMNAT2	AACTGGCCCTCAAAGTCCCGCT#CGGGTTGGGGGTGGGTG#.(((.((((((((...((((..#)))))))))))).))).	1247	1264	1	-22.9	0	0.0259094	0.368	-0.0745727	-0.00834179	-9.7377	15	17	12	3UTR		0	0
hsa-miR-193b-3p	NM_170721	MSI2	AACTGGCCCTCAAAGTCCCGCT#AGAGGAGCTATATAAACACTATCTGACTATCTTTGTCTTTTGGGGCCAGTG#.(((((((((.((((.(.....#.).)))).))))))))).	1306	1357	1	-21.7	1	8.604319e-05	0.559	-0.701107	-0.062519	-6.85115	14	18	9	3UTR		1	0
hsa-miR-193b-3p	NM_170731	BDNF	AACTGGCCCTCAAAGTCCCGCT#GGATTGCAAGGGCCAGA#..((((((((...(((((....#)))))...)))))))).	3782	3799	1	-22.7	1	0.000505218	0.559	7.339175000000001	7.362516874999997	-12.4177	13	17	8	3UTR		0	0
hsa-miR-193b-3p	NM_170732	BDNF	AACTGGCCCTCAAAGTCCCGCT#GGATTGCAAGGGCCAGA#..((((((((...(((((....#)))))...)))))))).	3596	3613	1	-22.7	1	0.000505218	0.559	6.086308749999999	5.589478537499998	-12.4177	13	17	8	3UTR		0	0
hsa-miR-193b-3p	NM_170733	BDNF	AACTGGCCCTCAAAGTCCCGCT#GGATTGCAAGGGCCAGA#..((((((((...(((((....#)))))...)))))))).	3488	3505	1	-22.7	1	0.000505218	0.559	1.9192986250000001	3.9615747392499996	-12.4177	13	17	8	3UTR		0	0
hsa-miR-193b-3p	NM_170734	BDNF	AACTGGCCCTCAAAGTCCCGCT#GGATTGCAAGGGCCAGA#..((((((((...(((((....#)))))...)))))))).	3449	3466	1	-22.7	1	0.000505218	0.559	3.71568	3.37849	-12.4177	13	17	8	3UTR		0	0
hsa-miR-193b-3p	NM_170735	BDNF	AACTGGCCCTCAAAGTCCCGCT#GGATTGCAAGGGCCAGA#..((((((((...(((((....#)))))...)))))))).	4236	4253	1	-22.7	1	0.000505218	0.559	-0.362905	-0.125813	-12.4177	13	17	8	3UTR		0	0
hsa-miR-193b-3p	NM_170742	KCNJ16	AACTGGCCCTCAAAGTCCCGCT#GCAATTATGAGGGCTAC#...(((((((((.(((...((.#)).))).))))))))).	1615	1632	1	-17.5	0	0.00651991	0.632	-0.316643	0.8096294862500004	-7.80367	14	17	9	3UTR		0	0
hsa-miR-193b-3p	NM_171827	CD8A	AACTGGCCCTCAAAGTCCCGCT#AGTGGGGGCGGGGTGGGA#..((.(((((.....(((((((#)))))))..))))).)).	806	824	1	-20.3	0	5.053487e-05	0.618	0	0	-18.129	14	18	7	3UTR		0	0
hsa-miR-193b-3p	NM_172078	CAMK2B	AACTGGCCCTCAAAGTCCCGCT#AGTGGGAGTGCCTTTGGAATCTGGGCCGGG#..((((((((((((((((((((#)))))))....)))))).....))))))).	3071	3101	1	-27.7	1	0.000321779	0.456	5.116556586206898	4.51963	-4.957	20	30	7	3UTR		0	0
hsa-miR-193b-3p	NM_172079	CAMK2B	AACTGGCCCTCAAAGTCCCGCT#AGCTGTCTCTTGGGAGGGGCTGTGGGGGCCC#....((((((((.((((((.((#.)).)))))).)))))))).	2232	2263	1	-28.6	0	4.54543e-09	0.353	0	0	-10.8357	16	20	8	3UTR		0	0
hsa-miR-193b-3p	NM_172079	CAMK2B	AACTGGCCCTCAAAGTCCCGCT#AGTGGGAGTGCCTTTGGAATCTGGGCCGGG#..((((((((((((((((((((#)))))))....)))))).....))))))).	2999	3029	1	-27.7	1	0.000321779	0.456	0	0	-4.957	20	30	7	3UTR		0	0
hsa-miR-193b-3p	NM_172081	CAMK2B	AACTGGCCCTCAAAGTCCCGCT#AGTGGGAGTGCCTTTGGAATCTGGGCCGGG#..((((((((((((((((((((#)))))))....)))))).....))))))).	2954	2984	1	-27.7	1	0.000321779	0.456	4.0435165482758615	4.292140033749999	-4.957	20	30	7	3UTR		0	0
hsa-miR-193b-3p	NM_172082	CAMK2B	AACTGGCCCTCAAAGTCCCGCT#AGCTGTCTCTTGGGAGGGGCTGTGGGGGCCC#....((((((((.((((((.((#.)).)))))).)))))))).	2154	2185	1	-28.6	0	4.54543e-09	0.353	0	0	-10.8357	16	20	8	3UTR		0	0
hsa-miR-193b-3p	NM_172082	CAMK2B	AACTGGCCCTCAAAGTCCCGCT#AGTGGGAGTGCCTTTGGAATCTGGGCCGGG#..((((((((((((((((((((#)))))))....)))))).....))))))).	2921	2951	1	-27.7	1	0.000321779	0.456	0	0	-4.957	20	30	7	3UTR		0	0
hsa-miR-193b-3p	NM_172084	CAMK2B	AACTGGCCCTCAAAGTCCCGCT#AGTGGGAGTGCCTTTGGAATCTGGGCCGGG#..((((((((((((((((((((#)))))))....)))))).....))))))).	2792	2822	1	-27.7	1	0.000321779	0.456	2.7604360689655167	3.6351445987499993	-4.957	20	30	7	3UTR		0	0
hsa-miR-193b-3p	NM_172106	KCNQ2	AACTGGCCCTCAAAGTCCCGCT#AGTTATTTTCCAACAGGGGCTGGAGGGCTGGG#..(((((((((..((((((...#.)))))).))))))))).	2937	2969	1	-28.1	1	1.23494e-05	0.412	0	0	-9.59293	15	18	9	3UTR		0	0
hsa-miR-193b-3p	NM_172107	KCNQ2	AACTGGCCCTCAAAGTCCCGCT#AGTTATTTTCCAACAGGGGCTGGAGGGCTGGG#..(((((((((..((((((...#.)))))).))))))))).	2991	3023	1	-28.1	1	1.23494e-05	0.412	-0.224359	-0.216181	-9.59293	15	18	9	3UTR		0	0
hsa-miR-193b-3p	NM_172159	KCNAB1	AACTGGCCCTCAAAGTCCCGCT#GCTTATGCAATGGGAAGAATATGGGGGCCAGG#..((((((((((...(((((..#.)))))......)))))))))).	2380	2412	1	-26.4	1	0.00331295	0.485	0.6628	0.8812945674999999	-7.83842	15	23	10	3UTR		0	0
hsa-miR-193b-3p	NM_172160	KCNAB1	AACTGGCCCTCAAAGTCCCGCT#TGGGGGCCAGG#..((((((((((..........#)))))))))).	1568	1579	1	-21	1	0.00331295	0.485	0	0	-8.07147	10	11	10	3UTR		0	0
hsa-miR-193b-3p	NM_172163	KCNQ4	AACTGGCCCTCAAAGTCCCGCT#AGCTGTGGAGAGGGCCAGG#..(((((((((....(((((((#))).).)))))))))))).	3990	4009	1	-24.2	1	3.880609e-05	0.426	0	0	-11.1852	16	19	12	3UTR		0	0
hsa-miR-193b-3p	NM_172169	CAMK2G	AACTGGCCCTCAAAGTCCCGCT#GGACTTAGGGGGACCAGG#..(((((((((.((((((....#)))))).))))).)))).	2079	2097	1	-25.3	1	0.000267089	0.382	0	0	-8.3038	15	18	6	3UTR		0	0
hsa-miR-193b-3p	NM_172171	CAMK2G	AACTGGCCCTCAAAGTCCCGCT#GGACTTAGGGGGACCAGG#..(((((((((.((((((....#)))))).))))).)))).	2166	2184	1	-25.3	1	0.000267089	0.382	0	0	-8.3038	15	18	6	3UTR		0	0
hsa-miR-193b-3p	NM_172207	CAMKK1	AACTGGCCCTCAAAGTCCCGCT#AGCAGGGACAGGCTGGCCGGTG#.(((((((......((((((((#))).))))).....))))))).	2278	2300	1	-23.8	1	5.435295e-06	0.368	2.882910555555556	3.08072	-14.4098	15	22	7	3UTR		0	0
hsa-miR-193b-3p	NM_172216	CAMKK2	AACTGGCCCTCAAAGTCCCGCT#GCATTTGAGAGGGAGTAGGGGGCTAGA#..(((((((((..(.((((.((#.)).)))).).))))))))).	2396	2423	1	-24.6	1	0.000374344	0.456	0	0	-10.3284	16	21	9	3UTR		0	0
hsa-miR-193b-3p	NM_172217	IL16	AACTGGCCCTCAAAGTCCCGCT#GGGAAGGGTGGTGGAGCCAGTA#.(((((((((((...((((...#))))....))).)).)))))).	5218	5240	1	-22.4	1	0.000317265	0.485	0	0	-6.67474	15	22	6	3UTR		0	0
hsa-miR-193b-3p	NM_172226	CAMKK2	AACTGGCCCTCAAAGTCCCGCT#GCATTTGAGAGGGAGTAGGGGGCTAGA#..(((((((((..(.((((.((#.)).)))).).))))))))).	2273	2300	1	-24.6	1	0.000374344	0.456	0	0	-10.3284	16	21	9	3UTR		0	0
hsa-miR-193b-3p	NM_172229	KREMEN2	AACTGGCCCTCAAAGTCCCGCT#TGGGACTTGGCCTGACCGTGGGGGTCCAGA#..((((((((((((((((((..#))))))))..........)))))).)))).	1796	1826	1	-26.1	1	9.386556e-07	0.412	0	0	-4.957	18	30	8	3UTR		0	0
hsa-miR-193b-3p	NM_172245	CSF2RA	AACTGGCCCTCAAAGTCCCGCT#GACATTTGGGGCCAGG#..(((((((.(((((((.....#))).))))))))))).	1475	1491	1	-22.1	1	0.00294201	0.529	0	0	-6.19951	14	16	11	3UTR		0	0
hsa-miR-193b-3p	NM_172246	CSF2RA	AACTGGCCCTCAAAGTCCCGCT#GACATTTGGGGCCAGG#..(((((((.(((((((.....#))).))))))))))).	1320	1336	1	-22.1	1	0.00294201	0.529	-0.3256	-0.522331	-6.19951	14	16	11	3UTR		0	0
hsa-miR-193b-3p	NM_172367	TRARG1	AACTGGCCCTCAAAGTCCCGCT#AGCGGGGAGGGCCGAGG#..(((((((((.....((((((#))))))))))))).)).	1707	1724	1	-25.7	1	2.129501e-06	0.265	0	0	-11.4183	15	17	13	3UTR		0	0
hsa-miR-193b-3p	NM_172367	TRARG1	AACTGGCCCTCAAAGTCCCGCT#GGTGCAGGGCTCAGGGGGCCCGGG#..(((((((((..(((((((((#))))..)))))..))))))).)).	2588	2612	1	-24.7	1	5.139062e-08	0.309	0	0	-9.59293	18	24	7	3UTR		0	0
hsa-miR-193b-3p	NM_173090	CAPN3	AACTGGCCCTCAAAGTCCCGCT#AGTGGAATAGGGCTGGTTA#((((((((((....((.(((((#))))).)))))))))))).	1209	1228	1	-19.6	1	0.000168851	0.515	1.19547	0.8054791328040539	-12.2551	17	19	12	3UTR		0	0
hsa-miR-193b-3p	NM_173200	NR4A3	AACTGGCCCTCAAAGTCCCGCT#GGTGGGAGGGGGTTATAGTTC#(((((((((((....(((((((#)))))))))))))..))))).	2884	2905	1	-21	1	0.0420964	0.544	0	0	-10.1658	18	21	13	3UTR		0	0
hsa-miR-193b-3p	NM_173454	PDE8A	AACTGGCCCTCAAAGTCCCGCT#GGTGGGAATCTTTGATGCCAGA#..(((((..(((((((((((((#)))))))..)))))).))))).	3600	3622	1	-24.5	0	0.0173291	0.647	1.0919271066666667	1.48544	-8.32703	18	22	7	3UTR		0	0
hsa-miR-193b-3p	NM_173484	KLF17	AACTGGCCCTCAAAGTCCCGCT#GGTGCCTCCATCAGACCCAAAGGACTCATGGGGGCTAGC#..((((((((((.(((((....#.)))))..)))))))))).	1461	1500	1	-25.2	1	8.797702e-08	0.456	2.87717	2.9696	-6.24613	15	19	10	3UTR		0	0
hsa-miR-193b-3p	NM_173494	DNAAF6	AACTGGCCCTCAAAGTCCCGCT#ACTTTGGGAGGCCGA#...(((((((((((((......#)))))))).))))).	952	967	1	-18.7	0	3.077033e-06	0.456	-1.43848	-0.541017	-6.51454	13	15	8	3UTR		0	0
hsa-miR-193b-3p	NM_173495	PTCHD1	AACTGGCCCTCAAAGTCCCGCT#TGGGGTCTTAACCTGGGGGCCAA#...(((((((((((((((((..#))))).)))....))))))))).	7836	7859	1	-24.1	0	0.000106981	0.559	0	0	-6.51454	17	23	9	3UTR		0	0
hsa-miR-193b-3p	NM_173511	FAM117B	AACTGGCCCTCAAAGTCCCGCT#TGTGGATTTGGTTGGGCTAGTA#.((((((((...((((((((..#)).))))))....)))))))).	3054	3076	1	-21.5	1	0.00174258	0.559	0.5226915555555556	0.25362650250000013	-11.2074	16	22	8	3UTR		0	0
hsa-miR-193b-3p	NM_173512	SLC38A11	AACTGGCCCTCAAAGTCCCGCT#GGTGGGGGGGTGTGGGGGGTGGG#..(((.((((((...(((((((#))))))).....)))))).))).	1846	1869	1	-23.5	0	0.0130204	0.5	0.939456142857143	3.0736762037500007	-9.73938	16	23	7	3UTR		0	0
hsa-miR-193b-3p	NM_173528	CFAP161	AACTGGCCCTCAAAGTCCCGCT#GGTGGGAGTCTAGGGCTG#....((((((...(.(((((((#))))))).)..)))))).	1128	1146	1	-21.6	0	6.930634e-05	0.632	0.7987947142857144	0.549646	-17.7427	14	18	7	3UTR		0	0
hsa-miR-193b-3p	NM_173542	PLBD2	AACTGGCCCTCAAAGTCCCGCT#GGCAGGGAAGGTGGGGTCAGC#..(((((((.((...(((((((#))).))))...))))))))).	2578	2599	1	-24.2	1	0.000734944	0.426	0	0	-9.08093	16	21	9	3UTR		0	0
hsa-miR-193b-3p	NM_173557	RNF152	AACTGGCCCTCAAAGTCCCGCT#GGCTAAGGTGAGAGTTTGTGGGCTAGTG#.((((((((.((((.((.((((#.)))).)).)))).)))))))).	4727	4755	1	-26.5	1	0.00980864	0.544	0	0	-5.77128	18	23	8	3UTR		0	0
hsa-miR-193b-3p	NM_173566	PRR14L	AACTGGCCCTCAAAGTCCCGCT#GGCAGAGGGATGCTGTGGGTCAGC#..(((((((.((..((((((((#)))...)))))..)).))))))).	7987	8011	1	-24.9	1	7.101318e-06	0.412	0	0	-8.34548	17	24	7	3UTR		1	1
hsa-miR-193b-3p	NM_173586	SLC22A24	AACTGGCCCTCAAAGTCCCGCT#TGGAGATAATTTGGGGGCTT#....((((((((((((((((..#))).)))..)))))))))).	1577	1597	1	-19.7	0	0.0244939	0.676	0.12144428421052632	0.08132370000000001	-9.54656	16	20	10	3UTR		0	0
hsa-miR-193b-3p	NM_173595	ANKRD52	AACTGGCCCTCAAAGTCCCGCT#GGTGGGATTGGGGCCGGG#..((((((((...(((((((((#))))))))))))))))).	6816	6834	1	-28.7	1	0.000338888	0.382	0	0	-12.4177	17	18	17	3UTR		0	0
hsa-miR-193b-3p	NM_173642	RIMKLA	AACTGGCCCTCAAAGTCCCGCT#GCGGGGGGGGGGGCTAA#...((((((((....((((((.#))))))..)))))))).	2430	2447	1	-26.1	0	3.865958e-05	0.515	0	0	-12.7428	14	17	8	3UTR		0	0
hsa-miR-193b-3p	NM_173672	PPIL6	AACTGGCCCTCAAAGTCCCGCT#AGTGGGACAGGAATAGAACGCCAGTG#.(((((((((....((((((((#)))))))))))........)))))).	1221	1247	1	-22.9	1	0.00528891	0.412	0.3097032164705883	0.03165702175000001	-12.1109	17	26	11	3UTR		0	0
hsa-miR-193b-3p	NM_173698	FAM133A	AACTGGCCCTCAAAGTCCCGCT#GTGTTAGTAGAATTATTTCTGGACTTTGAGTTGCCTATCAAATCCCACTGTGCCAGTA#.(((((((((((((((((....#.))))))))))...................).)))))).	1101	1159	1	-22.6	1	0.00011484	0.5	1.0516530297297295	1.21674	-3.79332	17	39	10	3UTR		0	0
hsa-miR-193b-3p	NM_173698	FAM133A	AACTGGCCCTCAAAGTCCCGCT#GGTGGGAAGGGCAAGTG#.(((.(((((.....(((((((#)))))))))))).))).	1543	1560	1	-21.2	0	0.00277388	0.5	-0.0551486	0.44871310500000006	-16.9654	15	17	12	3UTR		0	0
hsa-miR-193b-3p	NM_173793	C22orf39	AACTGGCCCTCAAAGTCCCGCT#GGTGGCCCTGTTGTGTGATGCTGAGGGCTAGG#..((((((((((..(((.(((.#.))).)))..)))))))))).	1289	1321	1	-26.3	1	4.019895e-06	0.382	0.27786783000000004	0.339107	-7.10297	16	21	10	3UTR		0	0
hsa-miR-193b-3p	NM_173799	TIGIT	AACTGGCCCTCAAAGTCCCGCT#AGGGGAAAAAGGGGGGCTGGG#..(((((((((....((((.((#)))))).....))))))))).	1818	1839	1	-23	1	0.0660005	0.559	0.24221477777777778	0.27000410462499996	-11.1852	15	21	9	3UTR		0	0
hsa-miR-193b-3p	NM_173822	FAM126B	AACTGGCCCTCAAAGTCCCGCT#GCTGGGGTTTTGTGGGGGCGGGG#..((.((((((((((((((((.#)).)))))))..))))))).)).	2637	2660	1	-24.4	0	0.000674043	0.515	0	0	-9.07604	18	23	7	3UTR		0	1
hsa-miR-193b-3p	NM_173832	ZFP41	AACTGGCCCTCAAAGTCCCGCT#GCGGGGCGGGGGCTC#....(((((((...(((((((.#)))))))))))))).	2455	2470	1	-26	0	5.065275e-07	0.265	0	0	-15.0393	14	15	14	3UTR		0	0
hsa-miR-193b-3p	NM_173849	GSC	AACTGGCCCTCAAAGTCCCGCT#GCGGGAGGGGGTCGA#...((((((((....((((((.#)))))))))))))).	961	976	1	-23.9	0	4.170056e-05	0.441	3.67668	2.17526	-12.7428	14	15	14	3UTR		0	0
hsa-miR-193b-3p	NM_174894	TRAPPC5	AACTGGCCCTCAAAGTCCCGCT#GGGGGAGGCGTCTAGGGGGCCAGC#..(((((((((...(((((.((#)).)).))).....))))))))).	3785	3809	1	-26.2	1	3.745551e-06	0.397	0	0	-10.4498	16	24	9	3UTR		0	0
hsa-miR-193b-3p	NM_174900	ZFP42	AACTGGCCCTCAAAGTCCCGCT#AGGAGGATAGCTTGAGGCCAGG#..((((.((((((.((((..((#))..))))...)))))))))).	1822	1844	1	-20.8	0	7.481569e-05	0.426	0	0	-7.35753	16	22	10	3UTR		0	0
hsa-miR-193b-3p	NM_174908	CCDC50	AACTGGCCCTCAAAGTCCCGCT#AGCGGGTTTCACCATGTTGGCCAGG#..((((((..((..((((((((#))))))....))..))..)))))).	2366	2391	1	-23.8	1	0.00463173	0.515	1.2296006916666666	1.7889566162500006	-9.40187	16	25	6	3UTR		0	0
hsa-miR-193b-3p	NM_174916	UBR1	AACTGGCCCTCAAAGTCCCGCT#TGGAAAACTTTCTGAGGGCTGGG#..((((((((((((((.(((..#)))...))))..)))))))))).	5328	5351	1	-21.1	1	0.000687793	0.574	0	0	-4.957	17	23	10	3UTR	MIRT041472	0	0
hsa-miR-193b-3p	NM_174920	SAMD14	AACTGGCCCTCAAAGTCCCGCT#AGCGGGTGGGCATGAGCATGTGAGGACATGCTGGGAGGGCTCAGG#..(((((((((..(((((((((#)))))).......................)))..)))))).))).	4065	4110	1	-28	1	1.690921e-05	0.397	0	0	-9.59293	18	45	6	3UTR		0	0
hsa-miR-193b-3p	NM_174921	SMIM14	AACTGGCCCTCAAAGTCCCGCT#AGCTGGGCGCAGTGACTCATGCCTGTAATCCCAGCACTTTGGGAGGCTGGG#..((((((((((((((((((((#))).)))............................)))))))).)))))).	3014	3065	1	-23.1	1	0.000626478	0.441	2.567443551999999	2.83475	-4.957	20	51	8	3UTR	MIRT518284	1	0
hsa-miR-193b-3p	NM_174924	PDILT	AACTGGCCCTCAAAGTCCCGCT#GGTGGGGCGGGGGTAGGG#..((.((((((...((((((((#)))))))))))))).)).	2105	2123	1	-23.3	0	0.0617487	0.484	0	0	-14.5688	16	18	14	3UTR		0	0
hsa-miR-193b-3p	NM_174929	ZMIZ2	AACTGGCCCTCAAAGTCCCGCT#AGCTTGGGCTGTGCCTGCAAAGCTTGTGCAGGACCTGGGGGCCAGG#..((((((((((..((((.((.#.)).)))).)))))))))).	3884	3930	1	-29.7	1	5.494496e-08	0.368	-0.7547	-0.143325	-7.10297	16	20	10	3UTR		0	0
hsa-miR-193b-3p	NM_174936	PCSK9	AACTGGCCCTCAAAGTCCCGCT#GGTCGGGGGAGAGGGCCAA#...((((((((....(((((((#)).)))))..)))))))).	3417	3436	1	-25.1	0	3.417914e-05	0.382	0.15927200000000002	0.04182300849999998	-12.7428	15	19	8	3UTR		0	0
hsa-miR-193b-3p	NM_174940	TMEM80	AACTGGCCCTCAAAGTCCCGCT#GCGGGGAGGGTAGGGACCAGA#..((((((((.....((((((.#)))))).....)))).)))).	806	827	1	-24.8	1	0.000361714	0.412	0	0	-14.01	14	21	6	3UTR		0	0
hsa-miR-193b-3p	NM_174953	ATP2A3	AACTGGCCCTCAAAGTCCCGCT#GGCGGGTGAAGGGTCAGA#..((((((((((....((((((#))))))))).))))))).	3931	3949	1	-24.5	1	0.000283132	0.368	0	0	-8.07147	16	18	9	3UTR		0	0
hsa-miR-193b-3p	NM_175569	XG	AACTGGCCCTCAAAGTCCCGCT#GGGGGAACCTCTCTTTGAGGGGTCAT#...((((((((((((((((.(.#).))))......))))))))).))).	2574	2600	1	-23.1	0	7.346582e-06	0.485	0	0	-6.51454	17	26	9	3UTR		0	0
hsa-miR-193b-3p	NM_175571	GIMAP8	AACTGGCCCTCAAAGTCCCGCT#GTGGGAAGGGAAGCGGGTTCATGGCTTTGAGGGCCT#....((((((((((((((((((#.))))))......)))))))))))).	2648	2684	1	-32.8	0	9.565255e-06	0.412	0.05566666666666667	-0.066425	-9.54656	18	26	12	3UTR		0	0
hsa-miR-193b-3p	NM_175635	RUNX1T1	AACTGGCCCTCAAAGTCCCGCT#GGTGGTAGTAAAACACAGAGGGCCAGTA#.((((((((((...((.(((((#))))).......))...)))))))))).	2087	2115	1	-23.6	1	0.00822225	0.559	4.0141	3.8665358124999996	-9.2861	17	28	10	3UTR		1	1
hsa-miR-193b-3p	NM_175636	RUNX1T1	AACTGGCCCTCAAAGTCCCGCT#GGTGGTAGTAAAACACAGAGGGCCAGTA#.((((((((((...((.(((((#))))).......))...)))))))))).	2201	2229	1	-23.6	1	0.00822225	0.559	4.63856	4.734799902500001	-9.2861	17	28	10	3UTR		1	1
hsa-miR-193b-3p	NM_175709	CBX7	AACTGGCCCTCAAAGTCCCGCT#GGCTTGGGGTGGGACTTCCAGAGATAGGGATGGGTTGGGGGCGGGG#..((.(((((((((((((((((#.))))))))))..................))))))).)).	1029	1075	1	-30.3	0	0.0103446	0.544	-0.445179	-0.465759	-9.07604	19	40	10	3UTR		1	1
hsa-miR-193b-3p	NM_175719	TPO	AACTGGCCCTCAAAGTCCCGCT#TGGGAAGAGCACTCCTGGCTTCCTGCAGGGCCGGTG#.((((((((((((((((.....#.)))))..)).))))))))).	3157	3193	1	-22.3	1	1.92136e-06	0.382	0	0	-3.79332	16	21	9	3UTR		0	0
hsa-miR-193b-3p	NM_175767	IL6ST	AACTGGCCCTCAAAGTCCCGCT#GGTGGGAAGGATGGTCCAGA#..((((((.((....(((((((#)))))))..)).)).)))).	1994	2014	1	-20.8	1	0.00257347	0.529	0	0	-12.2416	15	20	7	3UTR		0	0
hsa-miR-193b-3p	NM_175769	TCF23	AACTGGCCCTCAAAGTCCCGCT#AGCTGGACAGGGCCAGG#..((((((((....((((.(((#))).)))))))))))).	2613	2630	1	-25.4	1	9.554128e-06	0.324	0.207397	-0.0853488	-13.2745	15	17	12	3UTR		0	0
hsa-miR-193b-3p	NM_175852	TXLNA	AACTGGCCCTCAAAGTCCCGCT#GGCATCTGGCACTTGCAATTTTGGATTTTGTGGGTCAGTTT#(((((((((.((((((((....#.)))))))).))))))))).	1890	1931	1	-25.9	1	0.00102867	0.574	0.9107458888888887	2.9218626525000007	-5.18008	17	20	9	3UTR	MIRT041508	0	1
hsa-miR-193b-3p	NM_175914	HNF4A	AACTGGCCCTCAAAGTCCCGCT#AGTGTGGGGGCAGGGGAGGGCTAA#...((((((((...((((((((#)))...)))))....)))))))).	3308	3332	1	-23.1	0	0.00292296	0.338	0	0	-12.0073	16	24	8	3UTR		0	0
hsa-miR-193b-3p	NM_175929	FGF14	AACTGGCCCTCAAAGTCCCGCT#GTGGGACAGGTTGTGGGTGGGTG#.(((.((((.(((.(((((((.#)))))))...))).)))).))).	12563	12586	1	-27	0	0.0508998	0.485	0	0	-10.0117	17	23	7	3UTR		0	0
hsa-miR-193b-3p	NM_176071	P2RY2	AACTGGCCCTCAAAGTCCCGCT#GGTGGGGCTTGGCCAGG#..((((((....((((((((((#)))))))))))))))).	6057	6074	1	-26.7	1	0.000220856	0.368	0	0	-13.4275	16	17	16	3UTR		0	0
hsa-miR-193b-3p	NM_176072	P2RY2	AACTGGCCCTCAAAGTCCCGCT#GGTGGGGCTTGGCCAGG#..((((((....((((((((((#)))))))))))))))).	6248	6265	1	-26.7	1	0.000220856	0.368	0	0	-13.4275	16	17	16	3UTR		0	0
hsa-miR-193b-3p	NM_176677	NHLRC4	AACTGGCCCTCAAAGTCCCGCT#GCCTGGACTTTGGGGCTGGC#..(((((((.((((((((.((.#))..))))))))))))))).	1318	1338	1	-26.6	1	1.417758e-08	0.353	6.477184999999999	3.9633539237499993	-6.19951	17	20	15	3UTR		0	0
hsa-miR-193b-3p	NM_176806	MOCS2	AACTGGCCCTCAAAGTCCCGCT#GGAGAGATTGGGCCAGA#..(((((((......(((....#)))......))))))).	2190	2207	1	-19.2	1	0.00901993	0.485	-0.223615	-0.332439	-15.2525	10	17	7	3UTR		1	1
hsa-miR-193b-3p	NM_176871	PDLIM2	AACTGGCCCTCAAAGTCCCGCT#GGTTGGGCCCCCGGGGCCAGG#..((((((((....((((.(((#))).))))....)))))))).	1268	1289	1	-24.3	1	7.709024e-09	0.338	0	0	-13.2745	15	21	8	3UTR		0	0
hsa-miR-193b-3p	NM_177402	SYT2	AACTGGCCCTCAAAGTCCCGCT#GGAGGGACTCAGGGAGAGGCCGGTG#.((((((((((..((((((.((#)).))))))....))).))))))).	6517	6542	1	-28.1	1	4.037243e-05	0.368	0	0	-8.42926	18	25	7	3UTR		0	0
hsa-miR-193b-3p	NM_177403	RAB7B	AACTGGCCCTCAAAGTCCCGCT#AGGAGGGCTTCCCTGAGGAGGTGGCATTTGGTCTGAGGGCTAGA#..((((((((((((((.(((((#.))))).))))....)))))))))).	1931	1975	1	-25	1	0.000177322	0.441	0	0	-4.957	19	26	10	3UTR		0	0
hsa-miR-193b-3p	NM_177452	TRAPPC6B	AACTGGCCCTCAAAGTCCCGCT#GGACCATATCATCTTAGTGGTTTGGGGTCAGTG#.((((((((.((((...(((((#.))))))))))))))))).	1454	1487	1	-22.2	1	3.614821e-06	0.588	0	0	-6.00433	17	19	17	3UTR		0	0
hsa-miR-193b-3p	NM_177452	TRAPPC6B	AACTGGCCCTCAAAGTCCCGCT#GCGGGAGTAGGTGGGG#......(((.(..(.((((((.#)))))).)..).))).	3100	3116	1	-19.7	0	0.000198542	0.603	0	0	-22.1804	11	16	6	3UTR		0	0
hsa-miR-193b-3p	NM_177531	PKHD1L1	AACTGGCCCTCAAAGTCCCGCT#AGCGGGGGTATGGAGGGTTG#....(((((((....(((((((#))))))).....))))))).	18765	18785	1	-23.9	0	0.0199558	0.456	0	0	-15.7748	14	20	7	3UTR		0	0
hsa-miR-193b-3p	NM_177560	CSNK2A1	AACTGGCCCTCAAAGTCCCGCT#AGCGGGATATCCACCATGCTGCTGTGAGACTCGGGCAGTTG#(((((.((((((..((((((((#))))))))................))))....)).))))).	11222	11263	1	-23.1	0	0.0124898	0.471	2.39866	2.3058141674999995	-7.9845	19	41	8	3UTR		0	0
hsa-miR-193b-3p	NM_177963	SYT12	AACTGGCCCTCAAAGTCCCGCT#AGTGCTGATGGCAGCCCAGCTGTGTGGACTCAGGGGGCTCTGAGGGCTAGG#..((((((((((.((((((.((#.)))))))).)))))))))).	2026	2077	1	-31.5	1	2.750747e-05	0.412	0	0	-6.24613	18	21	10	3UTR		0	0
hsa-miR-193b-3p	NM_177966	PDE12	AACTGGCCCTCAAAGTCCCGCT#AGCACTCTGGGAGGCTGAGGCCGGTG#.(((((.(((((...(((((..#.)))))...)))))))))).	7488	7514	1	-23.2	0	4.302619e-06	0.397	0	0	-8.21843	15	20	10	3UTR		0	0
hsa-miR-193b-3p	NM_178009	DGKH	AACTGGCCCTCAAAGTCCCGCT#AGTGGGATGGGGCCT#....((((((....((((((((#)))))))))))))).	6756	6771	1	-23.8	0	0.000140621	0.456	0	0	-17.8641	14	15	14	3UTR		0	0
hsa-miR-193b-3p	NM_178014	TUBB	AACTGGCCCTCAAAGTCCCGCT#GGGATCAAGGGGGTTGGG#..(((((((((...(((((...#)))))...))))))))).	2159	2177	1	-21.9	1	0.00355116	0.412	-0.226547	-0.317006	-10.4498	14	18	9	3UTR	MIRT041196	0	0
hsa-miR-193b-3p	NM_178033	CYP4X1	AACTGGCCCTCAAAGTCCCGCT#GGTGGGATAGGGGTCT#....((((((....((((((((#)))))))).)))))).	1787	1803	1	-20.5	0	0.000337496	0.515	3.03518	0.621175	-17.8641	14	16	8	3UTR		0	0
hsa-miR-193b-3p	NM_178152	DCX	AACTGGCCCTCAAAGTCCCGCT#TGGGTTGCAGATGTCCTTGAAGAGAGTGAGGCATTGAGGGCCAA#...((((((((((.(((.((((#.)))).))).)))))))))).	4494	4538	1	-27.7	0	3.531685e-05	0.441	0	0	-7.37138	17	21	10	3UTR		0	0
hsa-miR-193b-3p	NM_178153	DCX	AACTGGCCCTCAAAGTCCCGCT#TGGGTTGCAGATGTCCTTGAAGAGAGTGAGGCATTGAGGGCCAA#...((((((((((.(((.((((#.)))).))).)))))))))).	4479	4523	1	-27.7	0	3.531685e-05	0.441	0.240898	0.029255420000000015	-7.37138	17	21	10	3UTR		0	0
hsa-miR-193b-3p	NM_178167	ZNF598	AACTGGCCCTCAAAGTCCCGCT#AGCGGGAGTCCACCCCTGCCTCAGTGGTGGGCCAGTC#.(((((((((((...(((((((#))))))).................))).)))))))).	2954	2991	1	-28.2	1	2.41481e-05	0.397	0	0	-6.67474	18	37	8	3UTR		0	0
hsa-miR-193b-3p	NM_178173	IHO1	AACTGGCCCTCAAAGTCCCGCT#GCAGGACATTTGGGCTGGCCAA#...(((((((((((((((.((.#)).)))).))))))..))))).	2216	2238	1	-23.5	0	0.000157419	0.5	0.3240183111111112	-0.0308095	-6.51454	17	22	6	3UTR		0	0
hsa-miR-193b-3p	NM_178177	NMNAT3	AACTGGCCCTCAAAGTCCCGCT#AGCGGCCCCTGAGGGTCAGA#..((((((((((.....(((((#)))))....)))))))))).	1361	1381	1	-25.4	1	1.181127e-05	0.5	2.64099	0.689022	-8.07147	15	20	10	3UTR		0	0
hsa-miR-193b-3p	NM_178427	ARNT	AACTGGCCCTCAAAGTCCCGCT#GGTGGGGGTTTTGGGGTGGGC#..((.(((((.(((.(((((((#))))))).))).))))).)).	4529	4550	1	-25.2	0	0.00119471	0.397	2.034362428571429	0.9368266355000003	-12.6363	17	21	7	3UTR		1	1
hsa-miR-193b-3p	NM_178523	ZNF616	AACTGGCCCTCAAAGTCCCGCT#GGTGGGAAGGGCAGGG#..((.(((((.....(((((((#)))))))))))).)).	3826	3842	1	-20	0	0.0245136	0.426	0	0	-18.129	14	16	12	3UTR		0	0
hsa-miR-193b-3p	NM_178544	ZNF546	AACTGGCCCTCAAAGTCCCGCT#AGCAAACAATTTGTGGGCCAGTG#.((((((((.((((.....(((#)))......)))).)))))))).	3651	3674	1	-22.3	1	0.0182839	0.574	0	0	-6.00433	15	23	8	3UTR		0	0
hsa-miR-193b-3p	NM_178559	ABCB5	AACTGGCCCTCAAAGTCCCGCT#GGCGGATCACTTGAGGTCAGG#..((((.((((.((((.(((((#)))))...)))))))))))).	3788	3809	1	-20.9	0	0.000890815	0.382	0	0	-9.84749	17	21	12	3UTR		0	0
hsa-miR-193b-3p	NM_178582	HM13	AACTGGCCCTCAAAGTCCCGCT#GGTGGGGTGGGGGCAGTC#.(((.(((((((...(((((((#))))))))))))))))).	2539	2557	1	-23.8	0	6.574002e-05	0.382	0	0	-10.7938	17	18	17	3UTR	MIRT041269	0	0
hsa-miR-193b-3p	NM_180991	SLCO4C1	AACTGGCCCTCAAAGTCCCGCT#AGAGGAGCTGTGGGTCAGG#..(((((((....(((.((.((#)).)).)))..))))))).	4005	4024	1	-18.4	1	0.000148518	0.544	0.34013854285714284	0.24845905499999998	-13.6602	14	19	7	3UTR		0	0
hsa-miR-193b-3p	NM_181078	IL21R	AACTGGCCCTCAAAGTCCCGCT#AGCATCTCCGGGGCTTTGTGGGATCAGG#..(((((((.((((((((((..#.)))))))))).))).)))).	2490	2518	1	-28.3	1	1.214358e-06	0.382	0.4793310400000001	0.8736786099999998	-6.19951	17	21	10	3UTR		0	0
hsa-miR-193b-3p	NM_181309	IL22RA2	AACTGGCCCTCAAAGTCCCGCT#AGTGGGGTGGGTGGCGAGTA#.(((.(((((((...(((((((#))))))))))).))).))).	2516	2536	1	-23.4	0	0.0343614	0.603	0	0	-10.7938	17	20	11	3UTR		0	0
hsa-miR-193b-3p	NM_181310	IL22RA2	AACTGGCCCTCAAAGTCCCGCT#AGTGGGGTGGGTGGCGAGTA#.(((.(((((((...(((((((#))))))))))).))).))).	2346	2366	1	-23.4	0	0.0343614	0.603	0.38428345714285717	2.2699927699999995	-10.7938	17	20	11	3UTR		0	0
hsa-miR-193b-3p	NM_181351	NCAM1	AACTGGCCCTCAAAGTCCCGCT#GTGTTTCTTTGGGGGTTAGA#..(((((((((((((...(((.#)))...))))))))))))).	3758	3778	1	-23	1	0.00335346	0.574	0	0	-5.19005	16	20	13	3UTR		0	0
hsa-miR-193b-3p	NM_181352	ATF7IP	AACTGGCCCTCAAAGTCCCGCT#GGATTTTTAATATGAGGGCCAGC#..((((((((((((((((....#))))))......)))))))))).	5807	5830	1	-25.1	1	0.00065646	0.559	0	0	-4.957	16	23	10	3UTR		0	0
hsa-miR-193b-3p	NM_181357	DCAF11	AACTGGCCCTCAAAGTCCCGCT#CGGCATTTTGGGAGGCCGA#...(((((((((((((.(((..#))).)))))))).))))).	3204	3223	1	-21.7	0	7.178027e-06	0.471	0	0	-6.51454	16	19	8	3UTR		0	0
hsa-miR-193b-3p	NM_181425	FXN	AACTGGCCCTCAAAGTCCCGCT#AGTGGGGCTGCTCTGACATGAAAGTGGAAGTTAAGGAATCTGGGCTCTTATGGGGTCCTTGTGGGCCAGC#..(((((((.(((.((((((..#.))))).).))).))))))).	2915	2985	1	-24.7	1	8.046975e-08	0.529	0	0	-7.05635	16	21	7	3UTR		0	0
hsa-miR-193b-3p	NM_181435	C1QTNF3	AACTGGCCCTCAAAGTCCCGCT#GGATGTGGGGTCAGG#..(((((((.((..((((....#)))).))))))))).	1698	1713	1	-19.2	1	7.747553e-05	0.485	0	0	-8.34548	13	15	9	3UTR		0	0
hsa-miR-193b-3p	NM_181449	CD300E	AACTGGCCCTCAAAGTCCCGCT#GTGGGTTAGCAGAGTGTTGAGGGCTGGA#..(((((((((((...(((((.#)))))...........))))))))))).	2977	3005	1	-24.9	1	0.00499168	0.529	0	0	-6.78234	16	28	11	3UTR		0	0
hsa-miR-193b-3p	NM_181489	ZNF445	AACTGGCCCTCAAAGTCCCGCT#GGCTGGGCAGGGGGGCCAGA#..(((((((((...((((.(((#))).))))..))))))))).	5475	5495	1	-27.8	1	3.771261e-06	0.441	0	0	-10.4498	16	20	9	3UTR		0	0
hsa-miR-193b-3p	NM_181489	ZNF445	AACTGGCCCTCAAAGTCCCGCT#AGTGGGGCTGATGGAATCCTGAGGAGGCAGG#..(((.((((((.(((((((((#)))))))))..........))))).).))).	13615	13646	1	-24.6	0	3.089445e-05	0.5	0	0	-8.14709	18	31	9	3UTR		0	0
hsa-miR-193b-3p	NM_181504	PIK3R1	AACTGGCCCTCAAAGTCCCGCT#GGTGGGGGGTGGGGGTAGTG#.(((.(((((((...(((((((#)))))))..)))))))))).	5514	5534	1	-23.1	0	8.279139e-05	0.456	0	0	-10.7938	17	20	10	3UTR		0	1
hsa-miR-193b-3p	NM_181507	HPS5	AACTGGCCCTCAAAGTCCCGCT#AGACGGGAGGATCACTTGAGGCCAGG#..((((.((((((..(((((((#)).))))).......)))))))))).	4230	4256	1	-22.2	0	0.000876569	0.471	0	0	-8.09298	17	26	10	3UTR		0	0
hsa-miR-193b-3p	NM_181510	WFDC8	AACTGGCCCTCAAAGTCCCGCT#GCTGGGATCACAGGTGGGAGCCACTGTGCCTGGCCAGTTA#((((((((..((.(((((((((#.)))))))....)).))...)))))))).	998	1038	1	-23.8	1	0.000604324	0.515	0	0	-7.5256	19	29	8	3UTR		0	0
hsa-miR-193b-3p	NM_181523	PIK3R1	AACTGGCCCTCAAAGTCCCGCT#GGTGGGGGGTGGGGGTAGTG#.(((.(((((((...(((((((#)))))))..)))))))))).	6839	6859	1	-23.1	0	8.279139e-05	0.456	-0.137932	-0.187591	-10.7938	17	20	10	3UTR		0	1
hsa-miR-193b-3p	NM_181524	PIK3R1	AACTGGCCCTCAAAGTCCCGCT#GGTGGGGGGTGGGGGTAGTG#.(((.(((((((...(((((((#)))))))..)))))))))).	5576	5596	1	-23.1	0	8.279139e-05	0.456	0	0	-10.7938	17	20	10	3UTR		0	1
hsa-miR-193b-3p	NM_181655	C17orf58	AACTGGCCCTCAAAGTCCCGCT#AGTACTAAAGGGCCAGTG#.(((((((((...(((......#.)))..))))))))).	1102	1120	1	-18.6	1	0.00528792	0.706	-0.0602521	-0.115301	-11.254	12	16	9	3UTR		0	0
hsa-miR-193b-3p	NM_181672	OGT	AACTGGCCCTCAAAGTCCCGCT#GGGACTTTGCTGGTGTAGTC#.(((((((..(((((((((...#)))))))))..))).)))).	3843	3863	1	-21.6	1	0.0347763	0.603	2.736569811111111	0.4512827737500001	-6.09222	16	20	9	3UTR		0	0
hsa-miR-193b-3p	NM_181673	OGT	AACTGGCCCTCAAAGTCCCGCT#GGGACTTTGCTGGTGTAGTC#.(((((((..(((((((((...#)))))))))..))).)))).	3813	3833	1	-21.6	1	0.0347763	0.603	1.5864	2.3257	-6.09222	16	20	9	3UTR		0	0
hsa-miR-193b-3p	NM_181708	BCDIN3D	AACTGGCCCTCAAAGTCCCGCT#AGCACTTTGGGAGGCCGAGG#..((((((((((((((...(((#))))))))))).)))).)).	1714	1734	1	-20.5	1	1.04799e-05	0.368	0	0	-4.957	17	20	11	3UTR		0	0
hsa-miR-193b-3p	NM_181725	METTL2A	AACTGGCCCTCAAAGTCCCGCT#GGCGGATCATTTGAGGTCGGG#..((((.((((((((..(((((#)))))..).))))))))))).	3948	3969	1	-21.7	0	0.000241712	0.426	0	0	-6.73374	17	21	11	3UTR		0	0
hsa-miR-193b-3p	NM_181844	BCL6B	AACTGGCCCTCAAAGTCCCGCT#GCGGGATTGTGGAATTGGGTCAGG#..((((((((((.((((((((.#)))))))).)))....))))))).	2164	2188	1	-27.9	1	0.00206399	0.485	0	0	-6.24613	18	24	8	3UTR		0	0
hsa-miR-193b-3p	NM_181886	UBE2D3	AACTGGCCCTCAAAGTCCCGCT#GGCGGGGAGGGGGGTAACTCAGC#..(((((((((....(((((((#)))))))..))))))....))).	3955	3978	1	-23	1	9.791932e-05	0.529	0.9488300769230769	1.08915	-11.1852	16	23	7	3UTR		0	0
hsa-miR-193b-3p	NM_181888	UBE2D3	AACTGGCCCTCAAAGTCCCGCT#GGCGGGGAGGGGGGTAACTCAGC#..(((((((((....(((((((#)))))))..))))))....))).	3604	3627	1	-23	1	9.791932e-05	0.529	0.9488300769230769	1.77818	-11.1852	16	23	7	3UTR		0	0
hsa-miR-193b-3p	NM_181889	UBE2D3	AACTGGCCCTCAAAGTCCCGCT#GGCGGGGAGGGGGGTAACTCAGC#..(((((((((....(((((((#)))))))..))))))....))).	3627	3650	1	-23	1	9.791932e-05	0.529	0.9895660000000002	1.47586	-11.1852	16	23	7	3UTR		0	0
hsa-miR-193b-3p	NM_181890	UBE2D3	AACTGGCCCTCAAAGTCCCGCT#GGCGGGGAGGGGGGTAACTCAGC#..(((((((((....(((((((#)))))))..))))))....))).	3571	3594	1	-23	1	9.791932e-05	0.529	1.8983616923076918	1.60452	-11.1852	16	23	7	3UTR		0	0
hsa-miR-193b-3p	NM_181893	UBE2D3	AACTGGCCCTCAAAGTCCCGCT#GGCGGGGAGGGGGGTAACTCAGC#..(((((((((....(((((((#)))))))..))))))....))).	3419	3442	1	-23	1	9.791932e-05	0.529	5.031715384615385	6.127187524999999	-11.1852	16	23	7	3UTR		0	0
hsa-miR-193b-3p	NM_181897	PPP2R3A	AACTGGCCCTCAAAGTCCCGCT#GGCTGGGCATGGTGACTCATGCCTGTAATCCCGGCACTTTGGGAGGCCAA#...(((((((((((((.(((..#.))).)))))))).))))).	3838	3888	1	-25	0	1.223028e-05	0.441	0	0	-6.51454	16	20	8	3UTR		0	0
hsa-miR-193b-3p	NM_182490	ZNF227	AACTGGCCCTCAAAGTCCCGCT#AGGGGAGAAATAGGGCTGGTG#.(((((((((.....((((.((#)))))).....))))))))).	2796	2817	1	-21.9	1	0.00145659	0.603	0.3432297111111111	0.611031	-12.8463	15	21	9	3UTR		0	0
hsa-miR-193b-3p	NM_182509	ISM2	AACTGGCCCTCAAAGTCCCGCT#GCTGATTGTAGGGATGTGCAGGGCTGGG#..((((((((((..(((((((.#.)).))))).)).)))))))).	2112	2140	1	-23.3	1	0.000203601	0.368	0	0	-7.10297	17	22	8	3UTR		0	0
hsa-miR-193b-3p	NM_182531	ZNF778	AACTGGCCCTCAAAGTCCCGCT#TGGGGTCTTGCTGTGGGGGCTAGA#..((((((((((((((((((..#))))).)))....)))))))))).	6643	6667	1	-24.5	1	4.845414e-06	0.471	0	0	-4.957	18	24	10	3UTR		0	0
hsa-miR-193b-3p	NM_182531	ZNF778	AACTGGCCCTCAAAGTCCCGCT#GCTGGGAGGGGGCCTGGTG#.((((((((((....((((((.#)).))))))))))).))).	6074	6093	1	-23.4	1	1.119702e-06	0.324	0	0	-10.0215	16	19	11	3UTR		0	0
hsa-miR-193b-3p	NM_182554	C10orf53	AACTGGCCCTCAAAGTCCCGCT#GCTCGAGGGCCAGTG#.((((((((((..(((......#))).)))))))))).	2115	2130	1	-21.9	1	6.730318e-10	0.515	0	0	-8.42926	13	15	10	3UTR		0	0
hsa-miR-193b-3p	NM_182580	CYB561D1	AACTGGCCCTCAAAGTCCCGCT#GCAGGGTAGGAGGGCCAGG#..(((((((((.....(((((.#)).)))...))))))))).	2609	2628	1	-27.2	1	1.868559e-05	0.426	0	0	-11.4183	14	19	9	3UTR		0	0
hsa-miR-193b-3p	NM_182584	C20orf203	AACTGGCCCTCAAAGTCCCGCT#GGCGGGGACTGGGGGCTGAGG#..((((((((((...(((((((#)))))))..)))))))).)).	4254	4275	1	-26.1	1	1.110706e-05	0.426	0	0	-7.83842	17	21	8	3UTR		0	0
hsa-miR-193b-3p	NM_182597	LSMEM1	AACTGGCCCTCAAAGTCCCGCT#TGGGAGTGTACAGGGTTAGG#..((((((((...(.(((((..#))))).)....)))))))).	808	828	1	-20.3	1	0.000157415	0.529	0.5312808699999999	0.11277664949999995	-13.1532	14	20	8	3UTR		0	0
hsa-miR-193b-3p	NM_182620	SKA2	AACTGGCCCTCAAAGTCCCGCT#GGAAGATGTCTTGTTAACCCTTGATGTCTAGAGATTGGGGGCTGGTG#.((((((((((((..((.....#.))..)))))))))))).	447	494	1	-21.6	1	8.857596e-05	0.529	3.4458606666666665	2.2666712462499996	-5.38561	14	18	12	3UTR		0	0
hsa-miR-193b-3p	NM_182623	FAM131C	AACTGGCCCTCAAAGTCCCGCT#GGCACAGGGTAGGTGCGGCAGGGATGGGGCCAGTG#.(((((((((....((((((((#.))).)))))))))))))).	1166	1201	1	-28	1	6.109007e-05	0.324	-0.382885	0.24371374375000004	-12.1109	17	20	14	3UTR		0	0
hsa-miR-193b-3p	NM_182763	MCL1	AACTGGCCCTCAAAGTCCCGCT#GGCTTGGGGCAGTGAGGGCTTAGG#..((((((((((..((((((((#)))..)))))..)))))))).)).	3286	3310	1	-26.9	1	0.00673586	0.485	0.3330450909090909	-0.0642269	-7.10297	18	24	8	3UTR	MIRT004663	1	1
hsa-miR-193b-3p	NM_182791	CCDC33	AACTGGCCCTCAAAGTCCCGCT#AGCCAACTCCAGGGCTGGGGGTCAGG#..(((((((((..(((((....#.)))))))))))))).	1150	1176	1	-23	1	2.676391e-07	0.426	4.5701339999999995	4.0687181500000005	-9.59293	14	16	14	3UTR		0	0
hsa-miR-193b-3p	NM_182948	PRKACB	AACTGGCCCTCAAAGTCCCGCT#GTTGGTATTTGAGAGGTTAGTTT#((((((((((((((..((.((.#)).))..)))))).)))))))).	2602	2625	1	-21.8	1	0.000958518	0.662	0.9381949333333334	1.1954991974999996	-4.90607	18	23	8	3UTR		0	1
hsa-miR-193b-3p	NM_183057	VPS28	AACTGGCCCTCAAAGTCCCGCT#ACTTTGGGGGCCGGG#..((((((((((((((......#)))))))))))))).	1017	1032	1	-25.7	1	0.000377061	0.426	3.920221214285714	4.41591	-4.957	14	15	14	3UTR		0	0
hsa-miR-193b-3p	NM_183227	RAB23	AACTGGCCCTCAAAGTCCCGCT#AGTGACATAGGTTTTGGGGGCAAAATTCAGTTC#(((((((((((((((.((((((#)))).....))))))))))))......))))).	2704	2737	1	-20	1	0.000120838	0.588	0	0	-4.17062	21	33	12	3UTR		0	0
hsa-miR-193b-3p	NM_183234	RAB27A	AACTGGCCCTCAAAGTCCCGCT#AGGGGATTGGGGTGGGGCAGG#..(((.(((((..((((((.((#))))))))..)).))).))).	1538	1559	1	-22.5	0	0.00234223	0.529	0.6682987383333333	0.289173	-11.4939	16	21	8	3UTR		0	0
hsa-miR-193b-3p	NM_183237	RNF7	AACTGGCCCTCAAAGTCCCGCT#AGACGGGATTTCCCCATGTTGGCCAGG#..((((((..((((((((((((#)).)))))))).....))..)))))).	1263	1290	1	-24.1	1	0.00128844	0.515	0.7442250794444445	0.9895826413749997	-7.2559	18	27	8	3UTR		0	0
hsa-miR-193b-3p	NM_183238	ZNF605	AACTGGCCCTCAAAGTCCCGCT#GGTGGCTCATGCCTGCAATCCCAGGACTTTGGGAGGCCCAGC#..((((((((((((((((....#.)))))))))).)))).)).	8287	8329	1	-25.4	1	3.68967e-05	0.382	0	0	-4.957	16	20	10	3UTR		0	0
hsa-miR-193b-3p	NM_183353	RLIM	AACTGGCCCTCAAAGTCCCGCT#GGCTAGTTTTTATATTTTTAGTAGAGATGGGGACTTCACCGTGTTGGCCAGG#..((((((..(((((((((...#.))))))).....))..)))))).	5275	5327	1	-24.4	1	0.00104773	0.515	0	0	-7.2559	15	24	7	3UTR		0	0
hsa-miR-193b-3p	NM_183397	PXMP4	AACTGGCCCTCAAAGTCCCGCT#GCGGTGGTGTGGGGGCTGGTG#.(((((((((((.(.(.((((.#)))).).).))))))))))).	384	405	1	-26.2	1	1.371293e-06	0.368	0.18505769090909088	-0.10725	-5.81791	17	21	11	3UTR		0	0
hsa-miR-193b-3p	NM_183398	RNF14	AACTGGCCCTCAAAGTCCCGCT#GCGGGATATTTAGGGTA#.....(((((.((.(((((((.#))))))).)).))))).	1587	1604	1	-22.2	0	0.000489853	0.603	0.127937	-0.0823055	-17.3472	14	17	7	3UTR		0	0
hsa-miR-193b-3p	NM_183399	RNF14	AACTGGCCCTCAAAGTCCCGCT#GCGGGATATTTAGGGTA#.....(((((.((.(((((((.#))))))).)).))))).	1564	1581	1	-22.2	0	0.000489853	0.603	0.3798581571428571	0.827052	-17.3472	14	17	7	3UTR		0	0
hsa-miR-193b-3p	NM_183399	RNF14	AACTGGCCCTCAAAGTCCCGCT#AGCACTTTGGGAGGCCTAGG#..((((((((((((((...(((#))))))))))).)))).)).	3146	3166	1	-20.5	1	0.000112026	0.368	-0.320465	0.09163382874999992	-4.957	17	20	11	3UTR		0	0
hsa-miR-193b-3p	NM_183400	RNF14	AACTGGCCCTCAAAGTCCCGCT#GCGGGATATTTAGGGTA#.....(((((.((.(((((((.#))))))).)).))))).	1565	1582	1	-22.2	0	0.000489853	0.603	0	0	-17.3472	14	17	7	3UTR		0	0
hsa-miR-193b-3p	NM_183400	RNF14	AACTGGCCCTCAAAGTCCCGCT#AGCACTTTGGGAGGCCTAGG#..((((((((((((((...(((#))))))))))).)))).)).	3147	3167	1	-20.5	1	0.000112026	0.368	0	0	-4.957	17	20	11	3UTR		0	0
hsa-miR-193b-3p	NM_183420	FBXO25	AACTGGCCCTCAAAGTCCCGCT#GTGGGGCTGGGAGTAACTATAAATGAAACAAGATTGGCCGGG#..(((((((((..((((((((.#))))))))..)))......................)))))).	9926	9968	1	-27.5	1	0.00204746	0.529	0	0	-9.59293	17	42	8	3UTR		0	0
hsa-miR-193b-3p	NM_194286	SRRM4	AACTGGCCCTCAAAGTCCCGCT#GGATGGGATTTGAGAGGCCAA#...((((((((.((((((((((#)).))))))))))).))))).	4456	4477	1	-24.4	0	0.000350959	0.529	1.061654181818182	1.1045654219999999	-9.86134	18	21	11	3UTR		0	0
hsa-miR-193b-3p	NM_194429	CEP43	AACTGGCCCTCAAAGTCCCGCT#AGACGGGATTTCACCATGTTGGCCAGG#..((((((..((((((((((((#)).)))))))).....))..)))))).	4745	4772	1	-24.1	1	0.00647159	0.529	3.965361277777778	4.7849880250000005	-7.2559	18	27	8	3UTR		0	0
hsa-miR-193b-3p	NM_198056	SCN5A	AACTGGCCCTCAAAGTCCCGCT#AGCCATGGGGGTTTGGGGCTAA#...((((((.((((.(((((((#)))...)))).)))))))))).	7237	7259	1	-23.5	0	9.689594e-05	0.382	0	0	-8.4925	17	22	10	3UTR		0	0
hsa-miR-193b-3p	NM_198086	AJUBA	AACTGGCCCTCAAAGTCCCGCT#TGGGTCTGGGGAGGCTAGG#..(((((((((..((.((((..#)))).)).))).)))))).	1509	1528	1	-21.3	1	8.426897e-06	0.485	0	0	-9.82598	15	19	6	3UTR		1	1
hsa-miR-193b-3p	NM_198150	ARSK	AACTGGCCCTCAAAGTCCCGCT#AGTGGCTCACACCTGTAATCCCAGGACTTTGGGAGGCTGAGG#..((((((((((((((((....#.)))))))))).)))).)).	1900	1942	1	-23.6	1	3.38069e-05	0.485	0	0	-4.957	16	20	10	3UTR		0	0
hsa-miR-193b-3p	NM_198158	MITF	AACTGGCCCTCAAAGTCCCGCT#AGCTGATTTTGAGGGTTT#....(((((((((((((..(((#))).))))))))))))).	3586	3604	1	-21	0	0.000610896	0.676	0.0526129230769231	-0.0740256	-9.54656	16	18	13	3UTR		0	0
hsa-miR-193b-3p	NM_198159	MITF	AACTGGCCCTCAAAGTCCCGCT#AGCTGATTTTGAGGGTTT#....(((((((((((((..(((#))).))))))))))))).	3910	3928	1	-21	0	0.000610896	0.676	0.016553453846153785	0.7575346825000002	-9.54656	16	18	13	3UTR		0	0
hsa-miR-193b-3p	NM_198177	MITF	AACTGGCCCTCAAAGTCCCGCT#AGCTGATTTTGAGGGTTT#....(((((((((((((..(((#))).))))))))))))).	3795	3813	1	-21	0	0.000610896	0.676	0	0	-9.54656	16	18	13	3UTR		0	0
hsa-miR-193b-3p	NM_198178	MITF	AACTGGCCCTCAAAGTCCCGCT#AGCTGATTTTGAGGGTTT#....(((((((((((((..(((#))).))))))))))))).	3418	3436	1	-21	0	0.000610896	0.676	0	0	-9.54656	16	18	13	3UTR		0	0
hsa-miR-193b-3p	NM_198204	MLX	AACTGGCCCTCAAAGTCCCGCT#AGTGTTGCCTGCATTTCTCCCAGGACTTGGGGGTGGGG#..((.((((((.((((((....#.)))))))))))).)).	1593	1631	1	-23.2	0	3.504038e-05	0.515	0	0	-12.4228	14	17	12	3UTR		0	0
hsa-miR-193b-3p	NM_198205	MLX	AACTGGCCCTCAAAGTCCCGCT#AGTGTTGCCTGCATTTCTCCCAGGACTTGGGGGTGGGG#..((.((((((.((((((....#.)))))))))))).)).	1503	1541	1	-23.2	0	3.504038e-05	0.515	0	0	-12.4228	14	17	12	3UTR		0	0
hsa-miR-193b-3p	NM_198213	OASL	AACTGGCCCTCAAAGTCCCGCT#AGCGAGAGATGGGTGGCTGGTTC#((((((((((((...((.((((#)))).))..)))).)))))))).	2389	2412	1	-20.6	1	7.680173e-05	0.574	0.0792575230769231	0.5309084712500001	-6.81899	18	23	8	3UTR		0	0
hsa-miR-193b-3p	NM_198220	SNRPB2	AACTGGCCCTCAAAGTCCCGCT#AGTGTTACTTTGGAGGAGCTAA#...(((((((((((((..((((#))))..)))))).))).)))).	1066	1088	1	-18.5	0	0.0168669	0.691	4.7099644000000005	4.954027634999999	-6.51454	17	22	6	3UTR		0	0
hsa-miR-193b-3p	NM_198274	SMYD1	AACTGGCCCTCAAAGTCCCGCT#AGAAGGGGCTGTGTTTGGGCCACGTA#.((((((((.((.((((((.((#))..)))))).))...)))))).)).	2090	2116	1	-22.8	1	0.000178845	0.485	0	0	-6.32496	18	26	6	3UTR		0	0
hsa-miR-193b-3p	NM_198313	HTR3E	AACTGGCCCTCAAAGTCCCGCT#GCCTCCAGGGACTGGCCAGG#..((((((.....((((((...#.)))))))))))).	1832	1852	1	-21.9	1	7.545151e-08	0.426	3.52006	5.597488747499999	-14.7166	12	14	12	3UTR		0	0
hsa-miR-193b-3p	NM_198395	G3BP1	AACTGGCCCTCAAAGTCCCGCT#GTGGGAGGCTGAGGCCAGA#..((((.(((((...((((((.#))))))...))))))))).	6343	6362	1	-25.7	0	7.114983e-06	0.426	0	0	-9.38211	15	19	9	3UTR	MIRT041227	0	0
hsa-miR-193b-3p	NM_198460	GBP6	AACTGGCCCTCAAAGTCCCGCT#GGTGGTTTAAAGGCTATGAGGCCAGG#..((((.(((((.(((((((((#)))))......)))).))))))))).	4156	4182	1	-23.1	0	4.408753e-07	0.5	2.7478202666666665	3.3936447224999995	-7.78982	18	26	9	3UTR		0	0
hsa-miR-193b-3p	NM_198476	C19orf54	AACTGGCCCTCAAAGTCCCGCT#GGCTAATTTTTTGTATTTTTAGTAGAGACGGGGCTTTGCCATGTTGGCCAGG#..((((((..((((((((((((#.)).)))))))))).......)))))).	2863	2915	1	-26.9	1	8.008403e-06	0.515	3.8940023076923063	2.03527	-7.2559	18	28	10	3UTR		0	0
hsa-miR-193b-3p	NM_198484	ZNF621	AACTGGCCCTCAAAGTCCCGCT#GGGAGCTGTGTAGTGGGTCAGTG#.((((((((.(..((((((...#)))).)).....).)))))))).	2877	2900	1	-21.2	1	0.0327111	0.588	0	0	-9.67177	15	23	8	3UTR		0	0
hsa-miR-193b-3p	NM_198541	IGFL1	AACTGGCCCTCAAAGTCCCGCT#GGCTGGTGTTACCTGAGATCTGGGATGCTGAGTGGCTGTTTGGGGGCCAGA#..((((((((((((...(((((#.)))))...)))))))))))).	426	477	1	-29.5	1	3.663973e-05	0.471	0.217084	0.31593772500000006	-5.9255	17	22	12	3UTR		0	0
hsa-miR-193b-3p	NM_198597	SEC24C	AACTGGCCCTCAAAGTCCCGCT#GGCTTGGGGGCAGGACAAGGGCTAGG#..((((((((....((((.(((#.))).)))).)))))))).	4290	4316	1	-23.1	1	0.00176958	0.353	0	0	-13.2745	15	19	8	3UTR		0	0
hsa-miR-193b-3p	NM_198682	GYPE	AACTGGCCCTCAAAGTCCCGCT#GGCTTACGTTGACTGGCTACTAAGGGACTCTAGGAGTCAGA#..((((((((...((((((...#.))))))..))).))))).	408	449	1	-20.8	1	1.943182e-05	0.544	0.8095863333333333	1.5312933749999995	-12.4177	14	19	6	3UTR		0	0
hsa-miR-193b-3p	NM_198704	HSD11B1L	AACTGGCCCTCAAAGTCCCGCT#AGCGGGAGGAGGAGGGAAAGA#..((..(((((....(((((((#)))))))....)))))..)).	1279	1300	1	-25.7	0	0.0800263	0.382	0.17812700000000006	0.281148	-17.2052	14	21	7	3UTR		0	0
hsa-miR-193b-3p	NM_198705	HSD11B1L	AACTGGCCCTCAAAGTCCCGCT#AGCGGGAGGAGGAGGGAAAGA#..((..(((((....(((((((#)))))))....)))))..)).	1374	1395	1	-25.7	0	0.0800263	0.382	0	0	-17.2052	14	21	7	3UTR		0	0
hsa-miR-193b-3p	NM_198706	HSD11B1L	AACTGGCCCTCAAAGTCCCGCT#AGCGGGAGGAGGAGGGAAAGA#..((..(((((....(((((((#)))))))....)))))..)).	1617	1638	1	-25.7	0	0.0800263	0.382	0	0	-17.2052	14	21	7	3UTR		0	0
hsa-miR-193b-3p	NM_198707	HSD11B1L	AACTGGCCCTCAAAGTCCCGCT#AGCGGGAGGAGGAGGGAAAGA#..((..(((((....(((((((#)))))))....)))))..)).	1554	1575	1	-25.7	0	0.0800263	0.382	-0.745349	-0.225176	-17.2052	14	21	7	3UTR		0	0
hsa-miR-193b-3p	NM_198795	TDRD1	AACTGGCCCTCAAAGTCCCGCT#AGCACTTTGGGAGGCTGAGGTGGGAGGATCCCTTGAGGCCAGG#..((((.((((((.((((((((#.))))))).....).)))))))))).	4021	4064	1	-24.5	0	0.000341644	0.471	1.5111651992307693	1.1344676047500002	-7.35753	18	26	10	3UTR		0	0
hsa-miR-193b-3p	NM_198849	SIAH3	AACTGGCCCTCAAAGTCCCGCT#GGTGGCTCACGTCCATAATCCCAGGACTTTGGGAGGCCAA#...(((((((((((((((....#.)))))))))).))))).	3759	3799	1	-26.5	0	2.229086e-06	0.456	0	0	-6.51454	15	18	10	3UTR		0	0
hsa-miR-193b-3p	NM_198849	SIAH3	AACTGGCCCTCAAAGTCCCGCT#GGCTGGGGACTGGGCTAGA#..(((((((....(((((((((#)))..))))))))))))).	1514	1533	1	-23.6	1	0.000626144	0.412	1.8974292727272726	0.00636259950000001	-13.6602	16	19	13	3UTR		0	0
hsa-miR-193b-3p	NM_198887	NUP43	AACTGGCCCTCAAAGTCCCGCT#AGTGGGATCCAAAACACTCAATCCTGTAAAAGGGTACAGTC#.(((((((((....((((((((#))))))))......................))))).)))).	3649	3690	1	-19.4	1	0.000171892	0.603	0.43948050000000005	0.15844484999999997	-12.1109	17	41	8	3UTR		0	0
hsa-miR-193b-3p	NM_199003	THAP1	AACTGGCCCTCAAAGTCCCGCT#GGTTTCAAGATTGGGGATTTTGGGGTTT#....(((((.(((((((((...#.)))))))))))))).	923	951	1	-21.5	0	0.0525589	0.75	1.4544804444444444	0.7382122975000001	-10.7891	14	16	14	3UTR		0	0
hsa-miR-193b-3p	NM_199040	NUDT4	AACTGGCCCTCAAAGTCCCGCT#AGCTCAAGGGTGACAAGATGAAACTGGGAGAGGGCCGGG#..(((((((((....(((((..#.)))))))))))))).	7023	7062	1	-25.3	1	4.095517e-05	0.485	0	0	-11.1852	14	16	14	3UTR		0	0
hsa-miR-193b-3p	NM_199044	NSUN4	AACTGGCCCTCAAAGTCCCGCT#GCTTAGGGGCTTAGAAGGAGAAGCCAGTG#.((((((((((.(((((((((.#))...))))))).)).))....)))))).	1426	1455	1	-23.8	1	0.000455262	0.5	0	0	-7.14013	19	29	7	3UTR		0	0
hsa-miR-193b-3p	NM_199046	TEPP	AACTGGCCCTCAAAGTCCCGCT#GGGAGAGGGCTAGA#..(((((((((....((((...#))))))))))))).	1249	1263	1	-23.3	1	4.346025e-05	0.574	0.36451748888888885	0.03966933999999999	-11.1852	13	14	13	3UTR		0	0
hsa-miR-193b-3p	NM_199076	CNNM2	AACTGGCCCTCAAAGTCCCGCT#GCAGTTCTTTGGGGGCCAGA#..(((((((((((((..(.((.#)).)..))))))))))))).	7829	7849	1	-28	1	0.00108663	0.529	0	0	-5.19005	16	20	13	3UTR		1	0
hsa-miR-193b-3p	NM_199076	CNNM2	AACTGGCCCTCAAAGTCCCGCT#GGAGGGAACTTTGGGGATTGCCAGC#..(((((((((((((((((.((#)).)))).))))))))...))))).	3843	3868	1	-26.7	1	7.073742e-05	0.412	0	0	-4.957	19	25	8	3UTR		1	0
hsa-miR-193b-3p	NM_199123	SETD3	AACTGGCCCTCAAAGTCCCGCT#AGGGTGATTTTGGGGGAGGGTC#.(((..(((((((((((((.((#)))).)))))))))))..))).	1256	1278	1	-22.1	0	0.00133448	0.5	2.8654207142857144	1.45304	-9.81332	18	22	11	3UTR		0	0
hsa-miR-193b-3p	NM_199129	PEDS1	AACTGGCCCTCAAAGTCCCGCT#AGTGTTGGGGCCACTTGTGAGATCAGGGACTTGCAAACAAGTGCCTATGAGGGCCAGA#..(((((((((((((((((...#.)))))))...............)))))))))).	4326	4384	1	-30.3	1	9.384848e-05	0.559	0	0	-4.957	17	34	10	3UTR		0	0
hsa-miR-193b-3p	NM_199129	PEDS1	AACTGGCCCTCAAAGTCCCGCT#GTGGCTGGCGTTGGGGCCAGTG#.((((((((.(((.(((((((.#))))..))).))))))))))).	1225	1247	1	-27.1	1	2.510948e-08	0.353	0	0	-5.89267	18	22	11	3UTR		0	0
hsa-miR-193b-3p	NM_199131	VAX1	AACTGGCCCTCAAAGTCCCGCT#TGGGAAGCGAGGAGGGCCGGG#..(((((((((....(((((..#)))))......))))))))).	1262	1283	1	-26.4	1	2.997784e-05	0.441	0	0	-11.1852	14	21	9	3UTR		0	0
hsa-miR-193b-3p	NM_199131	VAX1	AACTGGCCCTCAAAGTCCCGCT#AGCCCTGTGAGTTTGGGGGTCAGG#..((((((((((((.(((.(((#)))...).)).)))))))))))).	2568	2592	1	-25.1	1	0.000314526	0.529	0	0	-5.69245	18	24	12	3UTR		0	0
hsa-miR-193b-3p	NM_199131	VAX1	AACTGGCCCTCAAAGTCCCGCT#TGGTGGCTTTGGGAGGTCCAGC#..((((((((((((((((((..#))).))))))))).)).)))).	2758	2780	1	-24.7	1	0.000110331	0.529	0	0	-4.957	18	22	9	3UTR		0	0
hsa-miR-193b-3p	NM_199161	SAA1	AACTGGCCCTCAAAGTCCCGCT#AGCGGGGAGAGGGTA#.....((((((....(((((((#))))))).)))))).	467	482	1	-21.1	0	0.0189224	0.515	1.8832922857142858	0.5748376449999999	-19.8938	13	15	7	3UTR		0	0
hsa-miR-193b-3p	NM_199169	PMEPA1	AACTGGCCCTCAAAGTCCCGCT#AGCATGAGGGGTGGGGCTTTGGGACCCACCGGGGCCAGTG#.(((((((((((((((((((((#.)))))))))))).........))))))))).	2487	2527	1	-35.5	1	1.213085e-06	0.338	0	0	-3.79332	21	32	12	3UTR		0	0
hsa-miR-193b-3p	NM_199177	MRRF	AACTGGCCCTCAAAGTCCCGCT#GGCTGGAAAGGGACTTGTGAGGTGCTAAGTAGCCAGTG#.((((((((((((((((((...#.))))))).))))).........)))))).	9115	9153	1	-27.4	1	9.055492e-05	0.441	0	0	-3.79332	18	30	7	3UTR	MIRT472985	0	0
hsa-miR-193b-3p	NM_199179	KIRREL2	AACTGGCCCTCAAAGTCCCGCT#GGCAGTGGGTGTTGGGAGTTTGGGGCCGGG#..(((((((.((((.(((((..#.))))).))))))))))).	2196	2226	1	-29	1	0.00100696	0.441	0.07891825714285715	-0.1211	-6.93496	16	19	11	3UTR		0	0
hsa-miR-193b-3p	NM_199180	KIRREL2	AACTGGCCCTCAAAGTCCCGCT#GGCAGTGGGTGTTGGGAGTTTGGGGCCGGG#..(((((((.((((.(((((..#.))))).))))))))))).	2615	2645	1	-29	1	0.00100696	0.441	0	0	-6.93496	16	19	11	3UTR		0	0
hsa-miR-193b-3p	NM_199190	LARP4	AACTGGCCCTCAAAGTCCCGCT#TGGGGGTGGGGGTCAGA#..((((((((((...(((((..#))))).)))))))))).	6009	6026	1	-23.3	1	3.459079e-06	0.5	1.26497	0.9563003375000002	-7.83842	15	17	10	3UTR		0	0
hsa-miR-193b-3p	NM_199282	ARHGAP27	AACTGGCCCTCAAAGTCCCGCT#GGCTGGCTGTGGGCCAGTTT#(((((((((....((.((.(((#))).))))..))))))))).	2646	2666	1	-23.3	1	6.741103e-06	0.353	0	0	-12.8738	16	20	9	3UTR		0	0
hsa-miR-193b-3p	NM_199289	NEK5	AACTGGCCCTCAAAGTCCCGCT#AGGGGGATTTGGCAGGGTCAT#...((((((((.(((((((.((#)).))))))).).))))))).	2578	2599	1	-24.1	0	0.000341842	0.456	0	0	-9.86134	17	21	7	3UTR		0	0
hsa-miR-193b-3p	NM_199296	ISM2	AACTGGCCCTCAAAGTCCCGCT#GCTGATTGTAGGGATGTGCAGGGCTGGG#..((((((((((..(((((((.#.)).))))).)).)))))))).	2458	2486	1	-23.3	1	0.000203601	0.368	0	0	-7.10297	17	22	8	3UTR		0	0
hsa-miR-193b-3p	NM_199351	ILDR2	AACTGGCCCTCAAAGTCCCGCT#AGTGGCTGGGTGAGGGTCGGA#..((((((((((.....(((((#))))).....)))))))))).	4227	4248	1	-24.1	1	0.00107976	0.515	0	0	-8.07147	15	21	10	3UTR		0	0
hsa-miR-193b-3p	NM_199351	ILDR2	AACTGGCCCTCAAAGTCCCGCT#GTGGGGTTACAGAGGGGGCTGGTA#.((((((((((...(((((((.#)))))...))...)))))))))).	8481	8505	1	-24.3	1	0.00217473	0.544	0	0	-9.2861	17	24	10	3UTR		0	0
hsa-miR-193b-3p	NM_199362	TPD52L2	AACTGGCCCTCAAAGTCCCGCT#GTGCCTTAGTGGCTCTTGGCAGGACACTGAGGGCCT#....((((((((..((((.(((#.))).))))..)))))))).	2000	2036	1	-27.8	0	1.644415e-06	0.353	-0.178885	0.14344483124999974	-11.6925	15	20	8	3UTR		0	0
hsa-miR-193b-3p	NM_199415	UBOX5	AACTGGCCCTCAAAGTCCCGCT#TGGTGAGTGTGGGGGCTGGTG#.(((((((((((.(.(((((..#))).)).).))))))))))).	3626	3647	1	-23.7	1	1.099825e-07	0.485	0	0	-5.81791	17	21	11	3UTR		0	0
hsa-miR-193b-3p	NM_199418	PRCP	AACTGGCCCTCAAAGTCCCGCT#GGTGGGAATTTAAGGGCCAA#...(((((((.(((.(((((((#))))))).))).))))))).	3130	3150	1	-26.4	0	0.0442935	0.647	0	0	-10.0748	17	20	7	3UTR		0	0
hsa-miR-193b-3p	NM_199424	WWP2	AACTGGCCCTCAAAGTCCCGCT#GGCGGGACACAGGGGTCCGGC#..((((((((....((((((((#))))))))...)))).)))).	2838	2859	1	-27.3	1	1.668398e-08	0.25	0.9768153750000002	0.7332837175000001	-13.2745	16	21	8	3UTR		0	0
hsa-miR-193b-3p	NM_199511	CCDC80	AACTGGCCCTCAAAGTCCCGCT#GGTGATGAGGGGCAAAGGGCCAGC#..((((((((....(((((.(.#.).)))))..)))))))).	9803	9827	1	-24.6	1	9.70155e-05	0.588	0	0	-13.2745	14	19	8	3UTR		0	0
hsa-miR-193b-3p	NM_201403	MOB3C	AACTGGCCCTCAAAGTCCCGCT#TGGGATAGGGGGAGGGTTGGA#..(((((((((...((((((..#)))))).....))))))))).	2643	2664	1	-21.3	1	0.0259326	0.559	0	0	-10.4498	15	21	9	3UTR		0	0
hsa-miR-193b-3p	NM_201430	RTN3	AACTGGCCCTCAAAGTCCCGCT#AGTGGGACTGAGAGGGAGTCAGC#..(((((((((..(((((((((#)))))))))..)))))..)))).	1414	1437	1	-28.4	1	7.773488e-05	0.441	-0.056982	0.39865	-9.59293	18	23	9	3UTR		0	0
hsa-miR-193b-3p	NM_201431	RASSF6	AACTGGCCCTCAAAGTCCCGCT#GGCAGATATGCAGAGGGACTTGGGGCTTTGCCAA#...((((((((.(((((((.((#.)).)))))))))))....)))).	3102	3136	1	-23	0	5.874441e-06	0.456	0.14669530833333333	-0.147663	-9.86134	17	24	11	3UTR		0	0
hsa-miR-193b-3p	NM_201524	ADGRG1	AACTGGCCCTCAAAGTCCCGCT#GCAGGGATGAGGGCCC#....((((((((...((((((.#)).)))))))))))).	4151	4167	1	-24.6	0	2.899336e-05	0.426	0	0	-12.428	14	16	12	3UTR		0	0
hsa-miR-193b-3p	NM_201525	ADGRG1	AACTGGCCCTCAAAGTCCCGCT#GCAGGGATGAGGGCCC#....((((((((...((((((.#)).)))))))))))).	4029	4045	1	-24.6	0	2.899336e-05	0.426	0	0	-12.428	14	16	12	3UTR		0	0
hsa-miR-193b-3p	NM_201536	NDRG2	AACTGGCCCTCAAAGTCCCGCT#GGAGGGGATTTGGGGCTGGG#..((((((((..(((((((.((#.))))))))))))))))).	1533	1553	1	-23.1	1	8.893732e-05	0.441	0	0	-11.1286	17	19	17	3UTR		0	0
hsa-miR-193b-3p	NM_201537	NDRG2	AACTGGCCCTCAAAGTCCCGCT#GGGGGAGACTTGCTGGTGGGTTAGTG#.((((((((((((((((((.((#)).)).)))))..))).)))))))).	1676	1702	1	-23.7	1	0.00110604	0.5	3.7147642272727266	3.77675	-3.79332	20	26	8	3UTR		0	0
hsa-miR-193b-3p	NM_201540	NDRG2	AACTGGCCCTCAAAGTCCCGCT#GGGGGAGACTTGCTGGTGGGTTAGTG#.((((((((((((((((((.((#)).)).)))))..))).)))))))).	1700	1726	1	-23.7	1	0.00110604	0.5	4.105896590909091	3.78433	-3.79332	20	26	8	3UTR		0	0
hsa-miR-193b-3p	NM_201595	GTF2A1	AACTGGCCCTCAAAGTCCCGCT#GACTTGGGGGGCGGGG#..((.((((((.(((((.....#))))).)))))).)).	5149	5165	1	-21.8	0	5.611901e-06	0.5	0	0	-12.4228	13	16	6	3UTR		0	0
hsa-miR-193b-3p	NM_201632	TCF7	AACTGGCCCTCAAAGTCCCGCT#GCGGGACAGAGGACCAT#...(((.((((...(((((((.#))))))).)))).))).	2108	2125	1	-24.8	0	0.00429397	0.441	0	0	-13.551	14	17	7	3UTR		0	0
hsa-miR-193b-3p	NM_201647	STAMBP	AACTGGCCCTCAAAGTCCCGCT#GGTGGGTCTGGGGGCCAGC#..(((((((((..((.((((((#)))))).))))))))))).	2696	2715	1	-29.6	1	7.59866e-06	0.441	0	0	-9.82598	17	19	11	3UTR		0	0
hsa-miR-193b-3p	NM_202001	ERCC1	AACTGGCCCTCAAAGTCCCGCT#GGCGGGAGGACTGCTTGAGGCCAGA#..((((.(((((((((((((((#)))))))...))..)))))))))).	1148	1173	1	-25.9	0	8.483948e-05	0.397	3.7536484999999993	2.5921780624999995	-6.50069	19	25	10	3UTR		0	0
hsa-miR-193b-3p	NM_202469	GIPC1	AACTGGCCCTCAAAGTCCCGCT#TGGGGCCTTGGGTTCTGTTTGGGGGTCAT#...(((((((((((((((((..#))))))...........))))))))))).	1233	1262	1	-22.9	0	0.000316712	0.441	2.8866366428571433	3.891803447499999	-6.51454	17	29	11	3UTR		0	0
hsa-miR-193b-3p	NM_202494	GIPC1	AACTGGCCCTCAAAGTCCCGCT#TGGGGCCTTGGGTTCTGTTTGGGGGTCAT#...(((((((((((((((((..#))))))...........))))))))))).	1145	1174	1	-22.9	0	0.000316712	0.441	2.4019693785714287	2.88034	-6.51454	17	29	11	3UTR		0	0
hsa-miR-193b-3p	NM_203283	RBPJ	AACTGGCCCTCAAAGTCCCGCT#GTGGGATGGATGGTTAGA#..((((((.((...(((((((.#))))))).)).)))))).	5109	5127	1	-20.1	1	0.00434307	0.691	0	0	-11.5062	15	18	7	3UTR		0	0
hsa-miR-193b-3p	NM_203284	RBPJ	AACTGGCCCTCAAAGTCCCGCT#GTGGGATGGATGGTTAGA#..((((((.((...(((((((.#))))))).)).)))))).	5184	5202	1	-20.1	1	0.00434307	0.691	0	0	-11.5062	15	18	7	3UTR		0	0
hsa-miR-193b-3p	NM_203305	FAM102A	AACTGGCCCTCAAAGTCCCGCT#TGGGGCTTTGGGTGGAAAACAGCCAGC#..((((((((((((((((((..#)))))))))))).).......))))).	2901	2928	1	-24.4	1	7.959174e-05	0.456	0	0	-4.957	18	27	12	3UTR		0	0
hsa-miR-193b-3p	NM_203315	BDH1	AACTGGCCCTCAAAGTCCCGCT#AGGGGGCTTTCGGCCCGGGGCAGG#..(((.(((((((((((((.((#)))))))))).))...))).))).	2720	2744	1	-22.3	0	1.563923e-07	0.324	0.39729897058823527	0.07400721875000002	-6.85796	18	24	10	3UTR		0	0
hsa-miR-193b-3p	NM_001369615	PCGF2	AACTGGCCCTCAAAGTCCCGCT#TGGGGGTGGGGGGCGGGTTT#((((.((((((..(.(((((..#))))).).)))))).)))).	1339	1359	1	-24	0	0.0142546	0.574	0	0	-13.428	16	20	6	3UTR		0	0
hsa-miR-193b-3p	NM_001369789	PWWP3A	AACTGGCCCTCAAAGTCCCGCT#GGCCTTGGCCCCCTGCTGGTCGCTGTTTCGGGGACTCGGGGCGGCCAGTA#.((((((((((..((((((...#.))))))..))).))))))).	3944	3994	1	-30.2	1	1.61369e-07	0.279	0	0	-8.42926	16	21	7	3UTR		0	0
hsa-miR-193b-3p	NM_001369797	PWWP3A	AACTGGCCCTCAAAGTCCCGCT#GGGGGGCTGGTTGTTTGTGGGCG#.....((((.(((((((((.(.#).))))))......))).)))).	1176	1199	1	-21.3	0	0.00467833	0.5	0	0	-14.9081	14	23	6	3UTR		0	0
hsa-miR-193b-3p	NM_001369798	COX6B2	AACTGGCCCTCAAAGTCCCGCT#TGGGGTGAGGGCACAGG#..((((((((((...(((((..#)))))))))))).))).	839	856	1	-23.1	1	7.508222e-07	0.426	0	0	-7.83842	15	17	12	3UTR		0	0
hsa-miR-193b-3p	NM_001369798	COX6B2	AACTGGCCCTCAAAGTCCCGCT#GGTGGGGTGGGGGCAGAGG#..((.(((((((...(((((((#))))))))))))))..)).	1983	2002	1	-22.8	0	0.0236657	0.471	0	0	-11.9575	16	19	14	3UTR		0	0
hsa-miR-193b-3p	NM_001369882	ADM2	AACTGGCCCTCAAAGTCCCGCT#AGTGGGACCAGGTGCGGGGGCAGA#..(((.((((((..((((((((#))))))))....)).)))).))).	1606	1630	1	-25.6	0	8.049935e-05	0.338	0	0	-9.00393	17	24	8	3UTR		0	0
hsa-miR-193b-3p	NM_001369917	TMEM150A	AACTGGCCCTCAAAGTCCCGCT#GCAGGAATTGGGGGCTGGG#..(((((((((((..(((.((.#)).))).))))))))))).	1578	1597	1	-24.1	1	0.00333338	0.412	0	0	-6.54929	16	19	11	3UTR		0	0
hsa-miR-193b-3p	NM_001370158	MAGEB16	AACTGGCCCTCAAAGTCCCGCT#GGTGGGGCTGGAGGAAAAATAGTA#.((((..((((..(((((((((#))))))))).)))).....)))).	1259	1283	1	-22.2	0	0.00156696	0.588	0	0	-11.8739	17	24	9	3UTR		0	0
hsa-miR-193b-3p	NM_001370159	MAGEB16	AACTGGCCCTCAAAGTCCCGCT#GGTGGGGCTGGAGGAAAAATAGTA#.((((..((((..(((((((((#))))))))).)))).....)))).	1281	1305	1	-22.2	0	0.00156696	0.588	0	0	-11.8739	17	24	9	3UTR		0	0
hsa-miR-193b-3p	NM_001370215	ZNF71	AACTGGCCCTCAAAGTCCCGCT#GGTGGGGACTCGGGGTCAGG#..((((((((...(((((((((#)))))).))).)))))))).	1923	1943	1	-25.7	1	0.000112543	0.353	0	0	-12.4177	17	20	8	3UTR	MIRT041568	0	1
hsa-miR-193b-3p	NM_001370302	TSPAN11	AACTGGCCCTCAAAGTCCCGCT#AGCATGGGGTGGGGCAGGGAGGGCTGGC#..(((((((((...((((((((#.))))))))...))))))))).	1268	1296	1	-30.7	1	3.713883e-06	0.426	0	0	-10.4498	17	22	9	3UTR		0	0
hsa-miR-193b-3p	NM_001370326	ANKFN1	AACTGGCCCTCAAAGTCCCGCT#GGGGCAGATTGTCCAGGGCTAGG#..(((((((((((.(((((...#)))))...)))...)))))))).	4623	4646	1	-23.4	1	0.00210373	0.471	0	0	-5.81384	16	23	8	3UTR		0	0
hsa-miR-193b-3p	NM_001370429	ADGRG1	AACTGGCCCTCAAAGTCCCGCT#GCAGGGATGAGGGCCC#....((((((((...((((((.#)).)))))))))))).	4047	4063	1	-24.6	0	2.899336e-05	0.426	0	0	-12.428	14	16	12	3UTR		0	0
hsa-miR-193b-3p	NM_001370432	ADGRG1	AACTGGCCCTCAAAGTCCCGCT#GCAGGGATGAGGGCCC#....((((((((...((((((.#)).)))))))))))).	3965	3981	1	-24.6	0	2.899336e-05	0.426	0	0	-12.428	14	16	12	3UTR		0	0
hsa-miR-193b-3p	NM_001370449	ZNF577	AACTGGCCCTCAAAGTCCCGCT#GGTGGGGAGAGGGTCAGC#..(((((((((....(((((((#))))))).))))))))).	5878	5896	1	-25.4	1	0.00611895	0.456	0	0	-11.1852	16	18	9	3UTR		0	0
hsa-miR-193b-3p	NM_001370450	ZNF577	AACTGGCCCTCAAAGTCCCGCT#GGTGGGGAGAGGGTCAGC#..(((((((((....(((((((#))))))).))))))))).	5701	5719	1	-25.4	1	0.00611895	0.456	0	0	-11.1852	16	18	9	3UTR		0	0
hsa-miR-193b-3p	NM_001370472	CNOT6	AACTGGCCCTCAAAGTCCCGCT#AGGGGGACGGGGCCAT#...(((((((....(((((.((#)).)))))))))))).	5967	5983	1	-24.6	0	0.00394037	0.485	0	0	-14.8321	14	16	12	3UTR	MIRT016605	1	0
hsa-miR-193b-3p	NM_001370535	RFWD3	AACTGGCCCTCAAAGTCCCGCT#GCTGGGACATTGGCAGGCCCAGTG#.(((((.((((((.(((((((.#)).))))).)))..))).))))).	3176	3200	1	-24	0	8.816238e-05	0.471	0	0	-6.19385	18	24	5	3UTR		0	0
hsa-miR-193b-3p	NM_001370548	FOXP1	AACTGGCCCTCAAAGTCCCGCT#GGCCCTGGGCTTTGGGGGGGTCCCAA#...(((((((((((((((.(((#)))...))))))))))))....))).	3461	3487	1	-24.4	0	1.795105e-06	0.515	0	0	-6.51454	18	26	12	3UTR		0	0
hsa-miR-193b-3p	NM_001370609	LRRC34	AACTGGCCCTCAAAGTCCCGCT#GTGGGACTTGAAAATTTTGACCATAGGAGCTTTGGTC#.(((((((((..(((((((((.#)))))))))...............))).)))..))).	3303	3340	1	-19.8	1	0.000130287	0.632	0	0	-9.9649	18	37	9	3UTR		0	0
hsa-miR-193b-3p	NM_001370694	ANO7	AACTGGCCCTCAAAGTCCCGCT#GGACTTTGGGAGGCTGAGG#..((((((((((((((((....#)))))))))).)))).)).	3860	3879	1	-23.4	1	5.909895e-05	0.426	0	0	-4.957	16	19	10	3UTR		0	0
hsa-miR-193b-3p	NM_001370959	POU6F2	AACTGGCCCTCAAAGTCCCGCT#GGAATTGGGGGCCAGG#..(((((((((((..(((....#))).))))))))))).	3677	3693	1	-24.4	1	0.000180308	0.515	0	0	-6.54929	14	16	11	3UTR		0	0
hsa-miR-193b-3p	NM_001371248	FAM131B	AACTGGCCCTCAAAGTCCCGCT#AGGGGGAGCATGAGGGCTG#....((((((((...((((.((#)).))))...)))))))).	2073	2092	1	-25.3	0	3.860165e-05	0.412	0	0	-12.428	14	19	8	3UTR		1	0
hsa-miR-193b-3p	NM_001371332	PTGR2	AACTGGCCCTCAAAGTCCCGCT#GGTATGATGTGTACATAGGGACTGGGGGCAGG#..(((.((((...((((((...#.)))))))))).))).	1762	1794	1	-23.2	0	0.00171842	0.515	0	0	-14.3187	13	16	10	3UTR		0	0
hsa-miR-193b-3p	NM_001371357	BCAP29	AACTGGCCCTCAAAGTCCCGCT#GGACTGTCATGTGGGGCCAGTTT#((((((((((...(((((....#))))).......)))))))))).	1340	1363	1	-23.7	1	0.000110992	0.574	0	0	-11.3983	15	23	10	3UTR		0	0
hsa-miR-193b-3p	NM_001371364	DUS4L-BCAP29	AACTGGCCCTCAAAGTCCCGCT#GGACTGTCATGTGGGGCCAGTTT#((((((((((...(((((....#))))).......)))))))))).	6521	6544	1	-23.7	1	0.000110992	0.574	0	0	-11.3983	15	23	10	3UTR		0	0
hsa-miR-193b-3p	NM_001371364	DUS4L-BCAP29	AACTGGCCCTCAAAGTCCCGCT#AGTTAGATTCAGGGCCAGG#..((((((((...((((..(((#)))..)))).)))))))).	3718	3737	1	-20	1	0.000287612	0.618	0	0	-12.4177	15	19	8	3UTR		0	0
hsa-miR-193b-3p	NM_001371365	DUS4L-BCAP29	AACTGGCCCTCAAAGTCCCGCT#GGACTGTCATGTGGGGCCAGTTT#((((((((((...(((((....#))))).......)))))))))).	6480	6503	1	-23.7	1	0.000110992	0.574	0	0	-11.3983	15	23	10	3UTR		0	0
hsa-miR-193b-3p	NM_001371365	DUS4L-BCAP29	AACTGGCCCTCAAAGTCCCGCT#AGTTAGATTCAGGGCCAGG#..((((((((...((((..(((#)))..)))).)))))))).	3677	3696	1	-20	1	0.000287612	0.618	0	0	-12.4177	15	19	8	3UTR		0	0
hsa-miR-193b-3p	NM_001371366	DUS4L-BCAP29	AACTGGCCCTCAAAGTCCCGCT#GGACTGTCATGTGGGGCCAGTTT#((((((((((...(((((....#))))).......)))))))))).	6442	6465	1	-23.7	1	0.000110992	0.574	0	0	-11.3983	15	23	10	3UTR		0	0
hsa-miR-193b-3p	NM_001371366	DUS4L-BCAP29	AACTGGCCCTCAAAGTCCCGCT#AGTTAGATTCAGGGCCAGG#..((((((((...((((..(((#)))..)))).)))))))).	3639	3658	1	-20	1	0.000287612	0.618	0	0	-12.4177	15	19	8	3UTR		0	0
hsa-miR-193b-3p	NM_001371367	DUS4L-BCAP29	AACTGGCCCTCAAAGTCCCGCT#GGACTGTCATGTGGGGCCAGTTT#((((((((((...(((((....#))))).......)))))))))).	6353	6376	1	-23.7	1	0.000110992	0.574	0	0	-11.3983	15	23	10	3UTR		0	0
hsa-miR-193b-3p	NM_001371367	DUS4L-BCAP29	AACTGGCCCTCAAAGTCCCGCT#AGTTAGATTCAGGGCCAGG#..((((((((...((((..(((#)))..)))).)))))))).	3550	3569	1	-20	1	0.000287612	0.618	0	0	-12.4177	15	19	8	3UTR		0	0
hsa-miR-193b-3p	NM_001371555	TMEM217	AACTGGCCCTCAAAGTCCCGCT#GGAATGATTCTCGGGAGAGGGCAGGTTG#((((.((((((....(((((..#.))))))))))).)))).	1359	1387	1	-22.4	0	0.000522527	0.544	0	0	-14.2848	15	18	11	3UTR		0	0
hsa-miR-193b-3p	NM_001371590	MFSD8	AACTGGCCCTCAAAGTCCCGCT#GGCCAAGGCAGGAGGATTGCTTGAGGCCAGG#..((((.(((((((((((..((#.))..)))))..)))))))))).	2896	2927	1	-21.6	0	3.876281e-06	0.471	0	0	-6.50069	17	23	10	3UTR		0	0
hsa-miR-193b-3p	NM_001371591	MFSD8	AACTGGCCCTCAAAGTCCCGCT#GGCCAAGGCAGGAGGATTGCTTGAGGCCAGG#..((((.(((((((((((..((#.))..)))))..)))))))))).	2940	2971	1	-21.6	0	3.876281e-06	0.471	0	0	-6.50069	17	23	10	3UTR		0	0
hsa-miR-193b-3p	NM_001371593	MFSD8	AACTGGCCCTCAAAGTCCCGCT#GGCCAAGGCAGGAGGATTGCTTGAGGCCAGG#..((((.(((((((((((..((#.))..)))))..)))))))))).	2817	2848	1	-21.6	0	3.876281e-06	0.471	0	0	-6.50069	17	23	10	3UTR		0	0
hsa-miR-193b-3p	NM_001371595	MFSD8	AACTGGCCCTCAAAGTCCCGCT#GGCCAAGGCAGGAGGATTGCTTGAGGCCAGG#..((((.(((((((((((..((#.))..)))))..)))))))))).	2782	2813	1	-21.6	0	3.876281e-06	0.471	0	0	-6.50069	17	23	10	3UTR		0	0
hsa-miR-193b-3p	NM_001371596	MFSD8	AACTGGCCCTCAAAGTCCCGCT#GGCCAAGGCAGGAGGATTGCTTGAGGCCAGG#..((((.(((((((((((..((#.))..)))))..)))))))))).	2931	2962	1	-21.6	0	3.876281e-06	0.471	0	0	-6.50069	17	23	10	3UTR		0	0
hsa-miR-193b-3p	NM_001371727	GABRB2	AACTGGCCCTCAAAGTCCCGCT#GCGAGGAGGGGTGCTAGA#..(((((((((....((((((.#))).))))))).))))).	4295	4313	1	-20.1	1	0.00150122	0.529	0	0	-11.1852	15	18	7	3UTR		0	0
hsa-miR-193b-3p	NM_001372167	NTNG1	AACTGGCCCTCAAAGTCCCGCT#AGGGGTAGGAAGGAGATAGACAAGGGCTACCACGAGGCTGGGGGCCAGTA#.((((((((((..((((.((..#.)).)))))))))))))).	5687	5737	1	-25.7	1	2.254562e-05	0.5	0	0	-8.42926	16	19	14	3UTR		0	0
hsa-miR-193b-3p	NM_001372169	NTNG1	AACTGGCCCTCAAAGTCCCGCT#AGGGGTAGGAAGGAGATAGACAAGGGCTACCACGAGGCTGGGGGCCAGTA#.((((((((((..((((.((..#.)).)))))))))))))).	5500	5550	1	-25.7	1	2.254562e-05	0.5	2.2453	2.9522621137500007	-8.42926	16	19	14	3UTR		0	0
hsa-miR-193b-3p	NM_001372327	SLC29A1	AACTGGCCCTCAAAGTCCCGCT#AGTGGGGACATTGTGGGTTTGGGGCTCAGA#..(((((((.((((..(((((.#.))))))))))))).))).	1644	1674	1	-22.5	1	0.000324846	0.382	0	0	-7.16801	16	19	13	3UTR		0	0
hsa-miR-193b-3p	NM_001374316	CRELD1	AACTGGCCCTCAAAGTCCCGCT#TGGGAAATTGAGGGCTT#....(((((((((..(((((..#)))))..))))))))).	1812	1829	1	-23.7	0	0.00010917	0.574	0	0	-11.1389	14	17	9	3UTR		0	0
hsa-miR-193b-3p	NM_001374318	CRELD1	AACTGGCCCTCAAAGTCCCGCT#TGGGAAATTGAGGGCTT#....(((((((((..(((((..#)))))..))))))))).	2368	2385	1	-23.7	0	0.00010917	0.574	0	0	-11.1389	14	17	9	3UTR		0	0
hsa-miR-193b-3p	NM_001374319	CRELD1	AACTGGCCCTCAAAGTCCCGCT#TGGGAAATTGAGGGCTT#....(((((((((..(((((..#)))))..))))))))).	1796	1813	1	-23.7	0	0.00010917	0.574	0	0	-11.1389	14	17	9	3UTR		0	0
hsa-miR-193b-3p	NM_001374400	RBPJ	AACTGGCCCTCAAAGTCCCGCT#GTGGGATGGATGGTTAGA#..((((((.((...(((((((.#))))))).)).)))))).	5107	5125	1	-20.1	1	0.00434307	0.691	0	0	-11.5062	15	18	7	3UTR		0	0
hsa-miR-193b-3p	NM_001374403	RBPJ	AACTGGCCCTCAAAGTCCCGCT#GTGGGATGGATGGTTAGA#..((((((.((...(((((((.#))))))).)).)))))).	5233	5251	1	-20.1	1	0.00434307	0.691	0	0	-11.5062	15	18	7	3UTR		0	0
hsa-miR-193b-3p	NM_001374442	DYM	AACTGGCCCTCAAAGTCCCGCT#AGCCACTGGGGCCACATTGAGGGCCAGTTG#(((((((((((((.((((((..#.))))))....))))))))))))).	2985	3015	1	-31.9	1	9.400814e-06	0.426	0	0	-4.79441	19	25	13	3UTR		0	0
hsa-miR-193b-3p	NM_001374496	CTNS	AACTGGCCCTCAAAGTCCCGCT#GGTGGACGGGCTAGGACTTTGGGGTTAGG#..(((((((.((((((((.(((#.)))..))))))))))))))).	1701	1730	1	-26.7	1	1.024241e-06	0.412	0	0	-6.19951	18	22	15	3UTR		0	0
hsa-miR-193b-3p	NM_001374581	PHACTR1	AACTGGCCCTCAAAGTCCCGCT#GTGGGACATGAGTGGGTTGGA#..((((((((((..(((((((.#))))))).)))..))))))).	1980	2001	1	-22.9	1	0.00126539	0.5	0	0	-7.10297	17	21	7	3UTR		0	0
hsa-miR-193b-3p	NM_001374593	TMC6	AACTGGCCCTCAAAGTCCCGCT#AGAGGGACTTGGAGGGGAGACATATCAGTTG#(((((((((((.(((((((.((#)).))))))).)))))........)))))).	3003	3034	1	-25.5	1	0.00291157	0.515	0	0	-7.28438	20	31	7	3UTR		0	0
hsa-miR-193b-3p	NM_001374715	BAAT	AACTGGCCCTCAAAGTCCCGCT#GGTGGGAGTTGTTTGGGTCAT#...((((((...((.(((((((#))))))).))....)))))).	3157	3178	1	-23.2	0	0.00367547	0.412	0	0	-14.6641	15	21	7	3UTR		0	0
hsa-miR-193b-3p	NM_001374769	SIM1	AACTGGCCCTCAAAGTCCCGCT#TGGGACTTTGCTTTCATAAATCTATATGGGGTTGGG#..((((((((((((((((((..#)))))))))).................)))))))).	7610	7646	1	-23.6	1	4.488631e-05	0.559	0	0	-4.957	18	36	10	3UTR		0	0
hsa-miR-193b-3p	NM_001374799	AP3D1	AACTGGCCCTCAAAGTCCCGCT#GGCTGTGGGCAGGGCGGGGCCAGG#..((((((((....((((.(((#.))).)))))))))))).	4428	4452	1	-25.2	1	9.681065e-06	0.294	0.567929	0.8098809974999996	-13.2745	15	18	12	3UTR		0	0
hsa-miR-193b-3p	NM_001374814	RGS7	AACTGGCCCTCAAAGTCCCGCT#AGCTATGGAACCTGTGGACGAGGAGGGCCGA#...((((((((...((((((..#.)).))))...)))))))).	3093	3124	1	-24.4	0	0.00204855	0.574	0	0	-12.0073	14	20	8	3UTR		0	0
hsa-miR-193b-3p	NM_001375323	UTRN	AACTGGCCCTCAAAGTCCCGCT#GGTGGGTTGGGGGGCAA#...((.(((((((...((((((#))))))))))))).)).	4781	4798	1	-22.4	0	0.00790967	0.559	0	0	-10.2408	15	17	13	3UTR		0	0
hsa-miR-193b-3p	NM_001375323	UTRN	AACTGGCCCTCAAAGTCCCGCT#AGTGGGTGGGGGCTT#....((((((((....((((((#)))))))))))))).	3587	3602	1	-21.7	0	0.00123493	0.632	0	0	-12.661	14	15	14	3UTR		0	0
hsa-miR-193b-3p	NM_001375379	EBF3	AACTGGCCCTCAAAGTCCCGCT#GTGGTGATAAAAAGAGGGCCAA#...((((((((...(((((((.#)))).))).....)))))))).	2762	2784	1	-23.8	0	0.00224803	0.632	0	0	-12.0073	15	22	8	3UTR		0	0
hsa-miR-193b-3p	NM_001375380	EBF3	AACTGGCCCTCAAAGTCCCGCT#GTGGTGATAAAAAGAGGGCCAA#...((((((((...(((((((.#)))).))).....)))))))).	2875	2897	1	-23.8	0	0.00224803	0.632	0	0	-12.0073	15	22	8	3UTR		0	0
hsa-miR-193b-3p	NM_001375462	LPP	AACTGGCCCTCAAAGTCCCGCT#GGATGTTCTGAGGGCCAGA#..((((((((((..((((....#))))....)))))))))).	10908	10927	1	-25.4	1	7.57345e-05	0.647	0	0	-7.10297	14	19	10	3UTR		0	1
hsa-miR-193b-3p	NM_001375485	RNF167	AACTGGCCCTCAAAGTCCCGCT#AGCTTCTCCCTTACCCACACCTATCCTTTTGAGGGGCTTTGGGGTGGAGCTGGG#..(((((((((((((((((.(.#.).))))))))))))....))))).	1962	2016	1	-26	1	1.232047e-05	0.426	0	0	-4.957	18	25	12	3UTR		0	0
hsa-miR-193b-3p	NM_001375505	MAP2	AACTGGCCCTCAAAGTCCCGCT#GTGGGGGTGGGTCCAGTTA#(((((((((....(.((((((.#)))))).)))).)))))).	7019	7038	1	-22.7	1	0.00044086	0.559	0	0	-13.3762	16	19	6	3UTR		0	0
hsa-miR-193b-3p	NM_001375528	MAP2	AACTGGCCCTCAAAGTCCCGCT#GTGGGGGTGGGTCCAGTTA#(((((((((....(.((((((.#)))))).)))).)))))).	6834	6853	1	-22.7	1	0.00044086	0.559	0	0	-13.3762	16	19	6	3UTR		0	0
hsa-miR-193b-3p	NM_001375537	MAP2	AACTGGCCCTCAAAGTCCCGCT#GTGGGGGTGGGTCCAGTTA#(((((((((....(.((((((.#)))))).)))).)))))).	7134	7153	1	-22.7	1	0.00044086	0.559	0	0	-13.3762	16	19	6	3UTR		0	0
hsa-miR-193b-3p	NM_001375657	LOC102723971	AACTGGCCCTCAAAGTCCCGCT#AGCGGGGCTGCCAGG#..(((((......(((((((((#)))))))))))))).	1258	1273	1	-23.6	0	1.000347e-06	0.397	0	0	-17.0302	14	15	14	3UTR		0	0
hsa-miR-193b-3p	NM_001375670	ABI2	AACTGGCCCTCAAAGTCCCGCT#AGGGGAACTTGAGGGAGCAGTC#.((((.(((((((..((((.((#))))))..)))))))..)))).	6406	6428	1	-23.5	0	0.000277337	0.529	0	0	-7.28657	17	22	7	3UTR	MIRT016520	1	1
hsa-miR-193b-3p	NM_001375670	ABI2	AACTGGCCCTCAAAGTCCCGCT#CGGGATGGGGGCAGTG#.((((.((((....((((((..#)))))))))).)))).	4267	4283	1	-22.5	0	5.068678e-07	0.456	0	0	-14.0118	14	16	10	3UTR	MIRT016520	1	1
hsa-miR-193b-3p	NM_001375698	ABI2	AACTGGCCCTCAAAGTCCCGCT#AGGGGAACTTGAGGGAGCAGTC#.((((.(((((((..((((.((#))))))..)))))))..)))).	6154	6176	1	-23.5	0	0.000277337	0.529	0	0	-7.28657	17	22	7	3UTR	MIRT016520	1	1
hsa-miR-193b-3p	NM_001375698	ABI2	AACTGGCCCTCAAAGTCCCGCT#CGGGATGGGGGCAGTG#.((((.((((....((((((..#)))))))))).)))).	4015	4031	1	-22.5	0	5.068678e-07	0.456	0	0	-14.0118	14	16	10	3UTR	MIRT016520	1	1
hsa-miR-193b-3p	NM_001375834	WIPF1	AACTGGCCCTCAAAGTCCCGCT#CGGGACTTCTGGGCTCAGA#..(((((((...((((((((..#))))))))..)))).))).	2813	2832	1	-24.7	1	0.000331044	0.456	0	0	-12.3711	15	19	8	3UTR		0	0
hsa-miR-193b-3p	NM_001375835	WIPF1	AACTGGCCCTCAAAGTCCCGCT#CGGGACTTCTGGGCTCAGA#..(((((((...((((((((..#))))))))..)))).))).	2324	2343	1	-24.7	1	0.000331044	0.456	0	0	-12.3711	15	19	8	3UTR		0	0
hsa-miR-193b-3p	NM_001375836	WIPF1	AACTGGCCCTCAAAGTCCCGCT#GCCAGGCTTTGAGGCCAT#...(((.((((((((((..((.#))..))))))))))))).	1761	1779	1	-22.2	0	0.000229072	0.603	0	0	-8.05823	15	18	13	3UTR		0	0
hsa-miR-193b-3p	NM_001375847	XNDC1N	AACTGGCCCTCAAAGTCCCGCT#GGCTGGGCATGGTGGCCTGCACCTTTAATCCTGGCACTTTGGGAGGCCAA#...(((((((((((((.(((..#.))).)))))))).))))).	2965	3015	1	-23.5	0	1.6621e-06	0.382	0	0	-6.51454	16	20	8	3UTR		0	0
hsa-miR-193b-3p	NM_001375978	CHRM3	AACTGGCCCTCAAAGTCCCGCT#GGAGGGAGGTGGGAGGGCCGC#...((((((((....((((.((#)).)))).....)))))))).	4476	4497	1	-24.1	0	5.142112e-05	0.397	0	0	-12.7428	14	21	8	3UTR		0	0
hsa-miR-193b-3p	NM_001375982	CHRM3	AACTGGCCCTCAAAGTCCCGCT#GGAGGGAGGTGGGAGGGCCGC#...((((((((....((((.((#)).)))).....)))))))).	4480	4501	1	-24.1	0	5.142112e-05	0.397	0	0	-12.7428	14	21	8	3UTR		0	0
hsa-miR-193b-3p	NM_001376013	EPB41	AACTGGCCCTCAAAGTCCCGCT#GGTGGGCTTTGGGGTAGTGCCCAAGCCTGGTCGTGTTGCCAGG#..(((((((((((((.((((((#)))))))))))))).......................))))).	4785	4828	1	-27.2	1	2.63911e-05	0.456	0	0	-5.19005	19	43	14	3UTR		0	0
hsa-miR-193b-3p	NM_001376014	EPB41	AACTGGCCCTCAAAGTCCCGCT#GGTGGGCTTTGGGGTAGTGCCCAAGCCTGGTCGTGTTGCCAGG#..(((((((((((((.((((((#)))))))))))))).......................))))).	4716	4759	1	-27.2	1	2.63911e-05	0.456	0	0	-5.19005	19	43	14	3UTR		0	0
hsa-miR-193b-3p	NM_001376022	EPB41	AACTGGCCCTCAAAGTCCCGCT#GGTGGGCTTTGGGGTAGTGCCCAAGCCTGGTCGTGTTGCCAGG#..(((((((((((((.((((((#)))))))))))))).......................))))).	4679	4722	1	-27.2	1	2.63911e-05	0.456	0	0	-5.19005	19	43	14	3UTR		0	0
hsa-miR-193b-3p	NM_001376857	TXLNA	AACTGGCCCTCAAAGTCCCGCT#GGCATCTGGCACTTGCAATTTTGGATTTTGTGGGTCAGTTT#(((((((((.((((((((....#.)))))))).))))))))).	2037	2078	1	-25.9	1	0.00102867	0.574	0	0	-5.18008	17	20	9	3UTR	MIRT041508	0	1
hsa-miR-193b-3p	NM_001376929	SLC30A10	AACTGGCCCTCAAAGTCCCGCT#GGAGCTTATTGGGCTAGG#..(((((((...((((.((...#)).))))...))))))).	3094	3112	1	-19.9	1	1.355761e-05	0.647	0.9809428571428571	2.23683	-12.3711	13	18	7	3UTR		0	0
hsa-miR-193b-3p	NM_001377236	AHRR	AACTGGCCCTCAAAGTCCCGCT#GTGGACGCCCTCTCTGTTGTCAGTGGCTTTGAGGTGTCAGTG#.((((((((((((((((((((.#))))....................)))))))))).)))))).	3691	3733	1	-26.9	1	0.000177875	0.5	0	0	-3.79332	20	42	10	3UTR		0	0
hsa-miR-193b-3p	NM_001377237	PLEKHA1	AACTGGCCCTCAAAGTCCCGCT#GGCGGGAGGATCACCTGAGCCTGGGGAGGTTGAGGCCACAGTG#.(((((.((((((..(((((((#)))))))......................)))))).).)))).	9699	9742	1	-23	0	0.000166062	0.397	0	0	-6.9293	18	43	7	3UTR		0	0
hsa-miR-193b-3p	NM_001377239	AHRR	AACTGGCCCTCAAAGTCCCGCT#GTGGACGCCCTCTCTGTTGTCAGTGGCTTTGAGGTGTCAGTG#.((((((((((((((((((((.#))))....................)))))))))).)))))).	3638	3680	1	-26.9	1	0.000177875	0.5	0	0	-3.79332	20	42	10	3UTR		0	0
hsa-miR-193b-3p	NM_001377265	MAPT	AACTGGCCCTCAAAGTCCCGCT#GTGGGGCAGGCTCTTGGGGCCAGC#..(((((((.(((.(((((((.#)))))))......)))))))))).	5725	5749	1	-26.9	1	7.559984e-07	0.412	0	0	-7.05635	17	24	10	3UTR		0	0
hsa-miR-193b-3p	NM_001377265	MAPT	AACTGGCCCTCAAAGTCCCGCT#GGTGGGGGCCTGCTGTGGGTCAGTG#.((((((((.((.(((((((((#)))))))..))..)).)))))))).	3353	3378	1	-25.5	1	0.000110032	0.279	0	0	-6.32496	19	25	8	3UTR		0	0
hsa-miR-193b-3p	NM_001377265	MAPT	AACTGGCCCTCAAAGTCCCGCT#TGGGACTTTAGGGCTAA#...(((((((.(((((((((..#)))))))))))))))).	3636	3653	1	-25.6	0	0.00120505	0.515	0	0	-9.33931	16	17	16	3UTR		0	0
hsa-miR-193b-3p	NM_001377266	MAPT	AACTGGCCCTCAAAGTCCCGCT#GTGGGGCAGGCTCTTGGGGCCAGC#..(((((((.(((.(((((((.#)))))))......)))))))))).	5434	5458	1	-26.9	1	7.559984e-07	0.412	0	0	-7.05635	17	24	10	3UTR		0	0
hsa-miR-193b-3p	NM_001377266	MAPT	AACTGGCCCTCAAAGTCCCGCT#GGTGGGGGCCTGCTGTGGGTCAGTG#.((((((((.((.(((((((((#)))))))..))..)).)))))))).	3062	3087	1	-25.5	1	0.000110032	0.279	0	0	-6.32496	19	25	8	3UTR		0	0
hsa-miR-193b-3p	NM_001377266	MAPT	AACTGGCCCTCAAAGTCCCGCT#TGGGACTTTAGGGCTAA#...(((((((.(((((((((..#)))))))))))))))).	3345	3362	1	-25.6	0	0.00120505	0.515	0	0	-9.33931	16	17	16	3UTR		0	0
hsa-miR-193b-3p	NM_001377306	L3MBTL1	AACTGGCCCTCAAAGTCCCGCT#CGGGTCTTTGGCCAGAGGGGCAGC#..(((.(((((((((.((((..#)))).)))).....))))).))).	3441	3465	1	-24	0	9.81124e-05	0.471	0	0	-7.09101	16	24	5	3UTR		0	0
hsa-miR-193b-3p	NM_001377308	L3MBTL1	AACTGGCCCTCAAAGTCCCGCT#CGGGTCTTTGGCCAGAGGGGCAGC#..(((.(((((((((.((((..#)))).)))).....))))).))).	3262	3286	1	-24	0	9.81124e-05	0.471	0	0	-7.09101	16	24	5	3UTR		0	0
hsa-miR-193b-3p	NM_001377311	L3MBTL1	AACTGGCCCTCAAAGTCCCGCT#CGGGTCTTTGGCCAGAGGGGCAGC#..(((.(((((((((.((((..#)))).)))).....))))).))).	3340	3364	1	-24	0	9.81124e-05	0.471	0.8977042214285714	1.41852	-7.09101	16	24	5	3UTR		0	0
hsa-miR-193b-3p	NM_001377329	PLEKHG7	AACTGGCCCTCAAAGTCCCGCT#AGCACATTCGAATGAAGGGATCACGGGGGTCAGA#..(((((((((...(((((...#.)))))...))))))))).	4209	4243	1	-24.5	1	0.00657522	0.515	0	0	-10.4498	14	19	9	3UTR		0	1
hsa-miR-193b-3p	NM_001377498	NHEJ1	AACTGGCCCTCAAAGTCCCGCT#GCCTACCCGCCCGCTCCCCGGGGCTGGGGCTGGGGCCAGG#..((((((((...(((((((((#.))).)))))))))))))).	3542	3582	1	-29.6	1	1.343276e-05	0.265	0	0	-12.4177	17	20	14	3UTR		0	0
hsa-miR-193b-3p	NM_001377498	NHEJ1	AACTGGCCCTCAAAGTCCCGCT#GCTGGGCCAAGGGCCAGTA#.(((((((((....((((.((.#)).))))..))))))))).	5640	5659	1	-25.7	1	2.071177e-06	0.471	0	0	-12.1109	15	19	9	3UTR		0	0
hsa-miR-193b-3p	NM_001377499	NHEJ1	AACTGGCCCTCAAAGTCCCGCT#GCCTACCCGCCCGCTCCCCGGGGCTGGGGCTGGGGCCAGG#..((((((((...(((((((((#.))).)))))))))))))).	3607	3647	1	-29.6	1	1.343276e-05	0.265	-0.0461669	0.12442091249999998	-12.4177	17	20	14	3UTR		0	0
hsa-miR-193b-3p	NM_001377499	NHEJ1	AACTGGCCCTCAAAGTCCCGCT#GCTGGGCCAAGGGCCAGTA#.(((((((((....((((.((.#)).))))..))))))))).	5705	5724	1	-25.7	1	2.071177e-06	0.471	0	0	-12.1109	15	19	9	3UTR		0	0
hsa-miR-193b-3p	NM_001377973	DLG2	AACTGGCCCTCAAAGTCCCGCT#GCGGGATTTCTTGGCTAT#...(((((....(((((((((.#)))))))))...))))).	5671	5689	1	-21.5	0	0.00271706	0.544	3.463728544444445	5.325039777500001	-14.985	14	18	9	3UTR		0	0
hsa-miR-193b-3p	NM_001377979	DLG2	AACTGGCCCTCAAAGTCCCGCT#CGGAGCCTGGGGCCAGA#..(((((((.((..((.(((..#))).)).))))))))).	3833	3850	1	-20.5	1	2.222738e-05	0.471	0	0	-8.34548	14	17	9	3UTR		0	0
hsa-miR-193b-3p	NM_001378018	PRMT7	AACTGGCCCTCAAAGTCCCGCT#AGCACAGGGAGCTTGTGGGGCTGGCCGGTG#.(((((((.....((((((((.#.))))))))))))))).	2555	2585	1	-25.5	1	2.357892e-06	0.294	1.4378315000000002	1.0703491699999998	-13.5529	15	17	15	3UTR		0	0
hsa-miR-193b-3p	NM_001378021	PRMT7	AACTGGCCCTCAAAGTCCCGCT#AGCACAGGGAGCTTGTGGGGCTGGCCGGTG#.(((((((.....((((((((.#.))))))))))))))).	2653	2683	1	-25.5	1	2.357892e-06	0.294	0	0	-13.5529	15	17	15	3UTR		0	0
hsa-miR-193b-3p	NM_001378024	ARHGAP32	AACTGGCCCTCAAAGTCCCGCT#GGTGGGGTGGGGGGTGGC#..(((.((((((...(((((((#))))))))))))).))).	10147	10165	1	-21.9	0	0.0146672	0.441	0	0	-9.73938	16	18	13	3UTR		0	0
hsa-miR-193b-3p	NM_001378092	ANO1	AACTGGCCCTCAAAGTCCCGCT#AGCGGGGCTGGGCAGGCCAGC#..((((((..(..(((((((((#)))))))))..)..)))))).	3359	3380	1	-30.2	1	2.300949e-09	0.294	0	0	-11.8918	16	21	9	3UTR		0	0
hsa-miR-193b-3p	NM_001378120	MBD5	AACTGGCCCTCAAAGTCCCGCT#GGGATGAGGGCTCACAGG#..((((((((((...((((...#)))))))))))...))).	7416	7434	1	-21.6	1	0.00428853	0.588	0	0	-7.83842	14	18	11	3UTR		0	0
hsa-miR-193b-3p	NM_001378195	ROBO2	AACTGGCCCTCAAAGTCCCGCT#GGGATTTTGTGGCCGT#...(((((..(((((((((...#))))))))).))))).	8307	8323	1	-22.7	0	0.0131188	0.662	0.5395976666666666	0.30981500999999995	-8.81344	14	16	9	3UTR		0	0
hsa-miR-193b-3p	NM_001378532	ATP6V0A1	AACTGGCCCTCAAAGTCCCGCT#GTGGGACTGGGGTCC#....((((((...((((((((.#)))))))))))))).	3646	3661	1	-23.6	0	1.853911e-07	0.412	0.104796	-0.182403	-17.0073	14	15	14	3UTR		0	0
hsa-miR-193b-3p	NM_001378534	ATP6V0A1	AACTGGCCCTCAAAGTCCCGCT#GTGGGACTGGGGTCC#....((((((...((((((((.#)))))))))))))).	3616	3631	1	-23.6	0	1.853911e-07	0.412	0.12400733749999998	0.02219050375000001	-17.0073	14	15	14	3UTR		0	0
hsa-miR-193b-3p	NM_001378535	ATP6V0A1	AACTGGCCCTCAAAGTCCCGCT#GTGGGACTGGGGTCC#....((((((...((((((((.#)))))))))))))).	3595	3610	1	-23.6	0	1.853911e-07	0.412	0.7579580750000001	9.817000000000506e-05	-17.0073	14	15	14	3UTR		0	0
hsa-miR-193b-3p	NM_001378542	ATP6V0A1	AACTGGCCCTCAAAGTCCCGCT#GTGGGACTGGGGTCC#....((((((...((((((((.#)))))))))))))).	3348	3363	1	-23.6	0	1.853911e-07	0.412	0.7579580750000001	9.817000000000506e-05	-17.0073	14	15	14	3UTR		0	0
hsa-miR-193b-3p	NM_001378620	SLC24A4	AACTGGCCCTCAAAGTCCCGCT#GGCTGGATTTGGGGGCCAT#...((((((((.((((((.(((#))).)))))))))))))).	2202	2221	1	-26.6	0	0.000683429	0.426	0	0	-9.86134	17	19	14	3UTR		0	0
hsa-miR-193b-3p	NM_001378881	ZNF778	AACTGGCCCTCAAAGTCCCGCT#TGGGGTCTTGCTGTGGGGGCTAGA#..((((((((((((((((((..#))))).)))....)))))))))).	6720	6744	1	-24.5	1	4.845414e-06	0.471	0	0	-4.957	18	24	10	3UTR		0	0
hsa-miR-193b-3p	NM_001378881	ZNF778	AACTGGCCCTCAAAGTCCCGCT#GCTGGGAGGGGGCCTGGTG#.((((((((((....((((((.#)).))))))))))).))).	6151	6170	1	-23.4	1	1.119702e-06	0.324	0	0	-10.0215	16	19	11	3UTR		0	0
hsa-miR-193b-3p	NM_001379154	CSF2RA	AACTGGCCCTCAAAGTCCCGCT#GACATTTGGGGCCAGG#..(((((((.(((((((.....#))).))))))))))).	1601	1617	1	-22.1	1	0.00294201	0.529	0	0	-6.19951	14	16	11	3UTR		0	0
hsa-miR-193b-3p	NM_001379168	CSF2RA	AACTGGCCCTCAAAGTCCCGCT#GACATTTGGGGCCAGG#..(((((((.(((((((.....#))).))))))))))).	1314	1330	1	-22.1	1	0.00294201	0.529	0	0	-6.19951	14	16	11	3UTR		0	0
hsa-miR-193b-3p	NM_001379633	KIF1A	AACTGGCCCTCAAAGTCCCGCT#AGTGGGGCACCTTGGGGCTAGC#..(((((((.(((.((((((((#))))))))...)))))))))).	6057	6079	1	-27.8	1	7.674968e-05	0.324	0	0	-7.05635	18	22	10	3UTR		0	0
hsa-miR-193b-3p	NM_001379636	KIF1A	AACTGGCCCTCAAAGTCCCGCT#AGTGGGGCACCTTGGGGCTAGC#..(((((((.(((.((((((((#))))))))...)))))))))).	5895	5917	1	-27.8	1	7.674968e-05	0.324	0	0	-7.05635	18	22	10	3UTR		0	0
hsa-miR-193b-3p	NM_001379639	KIF1A	AACTGGCCCTCAAAGTCCCGCT#AGTGGGGCACCTTGGGGCTAGC#..(((((((.(((.((((((((#))))))))...)))))))))).	5805	5827	1	-27.8	1	7.674968e-05	0.324	0	0	-7.05635	18	22	10	3UTR		0	0
hsa-miR-193b-3p	NM_001379645	KIF1A	AACTGGCCCTCAAAGTCCCGCT#AGTGGGGCACCTTGGGGCTAGC#..(((((((.(((.((((((((#))))))))...)))))))))).	6083	6105	1	-27.8	1	7.674968e-05	0.324	0	0	-7.05635	18	22	10	3UTR		0	0
hsa-miR-193b-3p	NM_001379646	KIF1A	AACTGGCCCTCAAAGTCCCGCT#AGTGGGGCACCTTGGGGCTAGC#..(((((((.(((.((((((((#))))))))...)))))))))).	5907	5929	1	-27.8	1	7.674968e-05	0.324	0	0	-7.05635	18	22	10	3UTR		0	0
hsa-miR-193b-3p	NM_001379649	KIF1A	AACTGGCCCTCAAAGTCCCGCT#AGTGGGGCACCTTGGGGCTAGC#..(((((((.(((.((((((((#))))))))...)))))))))).	5808	5830	1	-27.8	1	7.674968e-05	0.324	0	0	-7.05635	18	22	10	3UTR		0	0
hsa-miR-193b-3p	NM_001379650	KIF1A	AACTGGCCCTCAAAGTCCCGCT#AGTGGGGCACCTTGGGGCTAGC#..(((((((.(((.((((((((#))))))))...)))))))))).	5807	5829	1	-27.8	1	7.674968e-05	0.324	0	0	-7.05635	18	22	10	3UTR		0	0
hsa-miR-193b-3p	NM_001379659	ZNF142	AACTGGCCCTCAAAGTCCCGCT#GGGGGACTTTGAGTGCTGTGCAGTG#.((((((.(((((((((((.(.#).))))))))))).))....)))).	7494	7519	1	-27.2	1	0.000581782	0.471	0	0	-6.10696	18	25	11	3UTR		0	0
hsa-miR-193b-3p	NM_001381	DOK1	AACTGGCCCTCAAAGTCCCGCT#GGTGGGAGGGGCCAT#...(((((((.....(((((((#)))))))))))))).	1572	1587	1	-23.2	0	2.044173e-05	0.382	0.7654522857142858	0.880524	-15.5675	14	15	14	3UTR		0	0
hsa-miR-193b-3p	NM_001382216	TNPO3	AACTGGCCCTCAAAGTCCCGCT#GGCGGGTGGGTGGGGAGTGCAGG#..((((((((((....((((((#))))))....))))).)).))).	4081	4104	1	-22.8	1	0.0725798	0.544	0	0	-8.07147	16	23	6	3UTR		0	0
hsa-miR-193b-3p	NM_001382228	NSG1	AACTGGCCCTCAAAGTCCCGCT#GTCACTTGCAAATAACAAAGGGACTTTGAGGGACAT#...((.(((((((((((((...#.))))))))))))).)).	565	601	1	-27.5	0	0.0079242	0.691	0	0	-8.4155	15	18	13	3UTR	MIRT016351	0	0
hsa-miR-193b-3p	NM_001382228	NSG1	AACTGGCCCTCAAAGTCCCGCT#GGTGGGGGTGGGGGACTGGTG#.(((((((((((...(((((((#))))))).)))))).))))).	1532	1553	1	-24.4	1	0.00752071	0.441	0	0	-6.67474	18	21	7	3UTR	MIRT016351	0	0
hsa-miR-193b-3p	NM_001382302	USP40	AACTGGCCCTCAAAGTCCCGCT#GTGGGAGGTGTGTGGGGTCAGG#..((((((((((...((((((.#))))))....)).)))))))).	1227	1249	1	-26	1	0.00846706	0.382	0	0	-7.83842	16	22	8	3UTR		0	0
hsa-miR-193b-3p	NM_001382304	NUTM2D	AACTGGCCCTCAAAGTCCCGCT#AGTGGGGGTGGGAAGCAGTGTGTTGGGGGCCTCGTG#.((.(((((((((..(((((((#.))))))).........)))))))))..)).	3144	3180	1	-26.6	0	2.624196e-06	0.471	0	0	-8.41764	18	31	9	3UTR		0	0
hsa-miR-193b-3p	NM_001382323	PKNOX2	AACTGGCCCTCAAAGTCCCGCT#GGAGGTGACTTTGAGGCCAC#...(((.((((((((((((.((#)).)).))))))))))))).	2431	2451	1	-24	0	4.310508e-05	0.471	0	0	-8.05823	17	20	13	3UTR		0	0
hsa-miR-193b-3p	NM_001382347	MYO5A	AACTGGCCCTCAAAGTCCCGCT#GCCGACTATGGGGATCTTTGGGCCAGTTT#(((((((((..((((((((...#.)))).))))))))))))).	8583	8612	1	-25.7	1	0.00161841	0.515	0	0	-8.00486	17	20	13	3UTR	MIRT041583	0	0
hsa-miR-193b-3p	NM_001382393	HDAC5	AACTGGCCCTCAAAGTCCCGCT#CGGGGCTGAGAGGGTGAA#...(.((((((..(((((((..#)))))))..)))))).).	4616	4634	1	-25.3	0	0.00440409	0.397	0	0	-15.2695	14	18	7	3UTR		0	0
hsa-miR-193b-3p	NM_001382436	CCDC32	AACTGGCCCTCAAAGTCCCGCT#AGCTGCAAGCCCCCAGGGACTTACCTGGGGCTGGC#..((((((((..(((((((...#.)))))))....)))))))).	805	840	1	-24	1	3.981251e-05	0.426	0	0	-11.1286	15	21	8	3UTR	MIRT016536	0	0
hsa-miR-193b-3p	NM_001382436	CCDC32	AACTGGCCCTCAAAGTCCCGCT#CGTGAGTGGGGCCAGTA#.(((((((((...(.((.((..#)).)).)))))))))).	1090	1107	1	-19.3	1	0.0001178	0.485	0	0	-11.9895	14	17	10	3UTR	MIRT016536	0	0
hsa-miR-193b-3p	NM_001382577	STIM1	AACTGGCCCTCAAAGTCCCGCT#GGCCCCAAGAGTGGGGCATGGGAAGGGCTGGTC#.((((((((((..(((((((((#.)))))))).)..)).)))))))).	2256	2289	1	-27.7	1	0.00026328	0.382	0.408085590909091	0.30132942375000005	-8.42926	19	25	8	3UTR		0	0
hsa-miR-193b-3p	NM_001382616	PMAIP1	AACTGGCCCTCAAAGTCCCGCT#GGAGGGTTACTTGGGGCCAGTA#.(((((((((..(((((((.((#)).)))..))))))))))))).	1191	1213	1	-24.6	1	0.00162885	0.662	0	0	-9.9649	18	22	13	3UTR	MIRT041571	0	0
hsa-miR-193b-3p	NM_001384332	SMIM43	AACTGGCCCTCAAAGTCCCGCT#AGCTGGGAGAGGTGTGGGTCAGTC#.((((((((.((...(((((((#))).))))....)).)))))))).	1843	1867	1	-25.6	1	0.00048426	0.471	0	0	-7.91725	17	24	8	3UTR		0	0
hsa-miR-193b-3p	NM_001384334	SMIM43	AACTGGCCCTCAAAGTCCCGCT#AGCTGGGAGAGGTGTGGGTCAGTC#.((((((((.((...(((((((#))).))))....)).)))))))).	1977	2001	1	-25.6	1	0.00048426	0.471	0	0	-7.91725	17	24	8	3UTR		0	0
hsa-miR-193b-3p	NM_001384523	GATAD2A	AACTGGCCCTCAAAGTCCCGCT#AGCAGAAAAGTGGACCTTGGGGGCTGGTTC#(((((((((((((.((.(((((#.))))))).))))))))))))).	2870	2900	1	-27.8	1	3.877552e-08	0.353	0	0	-4.79441	20	23	13	3UTR		0	0
hsa-miR-193b-3p	NM_001384528	GATAD2A	AACTGGCCCTCAAAGTCCCGCT#AGCAGAAAAGTGGACCTTGGGGGCTGGTTC#(((((((((((((.((.(((((#.))))))).))))))))))))).	2538	2568	1	-27.8	1	3.877552e-08	0.353	0	0	-4.79441	20	23	13	3UTR		0	0
hsa-miR-193b-3p	NM_001384542	USP49	AACTGGCCCTCAAAGTCCCGCT#AGTGGGAAGTGGGGAAAGCCAGG#..((((((((((...(((((((#)))))))..)))))...))))).	3746	3769	1	-24.7	1	0.000801171	0.471	0	0	-7.83842	17	23	7	3UTR		0	0
hsa-miR-193b-3p	NM_001384823	PRRC2B	AACTGGCCCTCAAAGTCCCGCT#GGTAGGGATTGGGGGGTCAGA#..(((((((((..(((((((((#))).)))))).))))))))).	7596	7617	1	-26.2	1	2.771135e-08	0.471	0	0	-9.59293	18	21	9	3UTR	MIRT041323	0	0
hsa-miR-193b-3p	NM_001384947	COL14A1	AACTGGCCCTCAAAGTCCCGCT#GGTGGGGCAGGGGCGGGGGGCGGTTC#(((((.(((((...((((((((#))))))))......))))).))))).	8069	8095	1	-26.5	0	7.597143e-05	0.441	0	0	-11.3313	18	26	8	3UTR		0	0
hsa-miR-193b-3p	NM_001384950	NLRC5	AACTGGCCCTCAAAGTCCCGCT#AGTCCAGGGGCTCAAGGGCCAGG#..((((((((...((((((...#.))))))..)))))))).	6378	6401	1	-27.2	1	9.016402e-06	0.382	0	0	-12.4177	14	18	8	3UTR		0	0
hsa-miR-193b-3p	NM_001385108	LRRC74A	AACTGGCCCTCAAAGTCCCGCT#GGCAGGGGCTGGGCACAA#...((((((....(((((((((#))).)))))))))).)).	1682	1700	1	-20.2	0	9.183846e-06	0.456	0.07957141000000001	0.8813833300000002	-15.2178	15	18	10	3UTR		0	0
hsa-miR-193b-3p	NM_001385161	MR1	AACTGGCCCTCAAAGTCCCGCT#TGGGAGCATTTGGGGGCAGG#..((.(((((((((((((((..#))))).).))))))))))).	6375	6395	1	-22.5	0	0.000954303	0.559	0	0	-9.07604	17	20	11	3UTR		0	0
hsa-miR-193b-3p	NM_001385162	MR1	AACTGGCCCTCAAAGTCCCGCT#TGGGAGCATTTGGGGGCAGG#..((.(((((((((((((((..#))))).).))))))))))).	6288	6308	1	-22.5	0	0.000954303	0.559	0	0	-9.07604	17	20	11	3UTR		0	0
hsa-miR-193b-3p	NM_001385164	MR1	AACTGGCCCTCAAAGTCCCGCT#TGGGAGCATTTGGGGGCAGG#..((.(((((((((((((((..#))))).).))))))))))).	6099	6119	1	-22.5	0	0.000954303	0.559	0	0	-9.07604	17	20	11	3UTR		0	0
hsa-miR-193b-3p	NM_001385175	USP36	AACTGGCCCTCAAAGTCCCGCT#AGTGTGGCTCTGCTGGGCCAGA#..(((((((.((.((((.((((#)))).)))).))..))))))).	4821	4843	1	-24.2	1	2.976256e-08	0.353	0	0	-7.48864	17	22	7	3UTR		0	0
hsa-miR-193b-3p	NM_001385278	GPRIN2	AACTGGCCCTCAAAGTCCCGCT#GGCTAGGCAGTGGGGGCCAGG#..((((((((((..(((..(((#)))..)))..)))))))))).	2757	2778	1	-27.1	1	2.291721e-05	0.397	0	0	-7.10297	16	21	10	3UTR		0	0
hsa-miR-193b-3p	NM_001385282	GPRIN2	AACTGGCCCTCAAAGTCCCGCT#GAGGGACCAGAGGGCTAGTG#.((((((((((...(((((.(.#).)))))..)))))))))).	2905	2925	1	-28.3	1	7.105454e-07	0.338	2.6812920900000003	1.8796469187499998	-9.2861	16	20	10	3UTR		0	0
hsa-miR-193b-3p	NM_001385282	GPRIN2	AACTGGCCCTCAAAGTCCCGCT#GGCTAGGCAGTGGGGGCCAGG#..((((((((((..(((..(((#)))..)))..)))))))))).	2722	2743	1	-27.1	1	2.291721e-05	0.397	1.00943	3.0010255812500004	-7.10297	16	21	10	3UTR		0	0
hsa-miR-193b-3p	NM_001385284	KIT	AACTGGCCCTCAAAGTCCCGCT#GGACACCGGGCCAGTA#.((((((((.....((((....#))))...)))))))).	4071	4087	1	-21.3	1	0.00246818	0.515	-0.579449	-0.169788	-13.3534	12	16	8	3UTR	MIRT734593	1	1
hsa-miR-193b-3p	NM_001385285	KIT	AACTGGCCCTCAAAGTCCCGCT#AGAGGGAGGTATGGACTGGGGGCCAGA#..(((((((((..(((((.(((#.)))..)))))))))))))).	3245	3272	1	-26.2	1	0.000205172	0.485	-0.231221	0.12266620500000001	-9.59293	17	21	14	3UTR	MIRT734593	1	1
hsa-miR-193b-3p	NM_001385285	KIT	AACTGGCCCTCAAAGTCCCGCT#GGACACCGGGCCAGTA#.((((((((.....((((....#))))...)))))))).	4065	4081	1	-21.3	1	0.00246818	0.515	-0.0243466	0.454628	-13.3534	12	16	8	3UTR	MIRT734593	1	1
hsa-miR-193b-3p	NM_001385288	KIT	AACTGGCCCTCAAAGTCCCGCT#AGAGGGAGGTATGGACTGGGGGCCAGA#..(((((((((..(((((.(((#.)))..)))))))))))))).	3239	3266	1	-26.2	1	0.000205172	0.485	0.022385977777777757	0.17856740749999994	-9.59293	17	21	14	3UTR	MIRT734593	1	1
hsa-miR-193b-3p	NM_001385367	TDRD1	AACTGGCCCTCAAAGTCCCGCT#AGCACTTTGGGAGGCTGAGGTGGGAGGATCCCTTGAGGCCAGG#..((((.((((((.((((((((#.))))))).....).)))))))))).	3793	3836	1	-24.5	0	0.000341644	0.471	0	0	-7.35753	18	26	10	3UTR		0	0
hsa-miR-193b-3p	NM_001385368	TDRD1	AACTGGCCCTCAAAGTCCCGCT#AGCACTTTGGGAGGCTGAGGTGGGAGGATCCCTTGAGGCCAGG#..((((.((((((.((((((((#.))))))).....).)))))))))).	3798	3841	1	-24.5	0	0.000341644	0.471	0	0	-7.35753	18	26	10	3UTR		0	0
hsa-miR-193b-3p	NM_001385387	ARHGAP27	AACTGGCCCTCAAAGTCCCGCT#GGCTGGCTGTGGGCCAGTTT#(((((((((....((.((.(((#))).))))..))))))))).	2665	2685	1	-23.3	1	6.741103e-06	0.353	0	0	-12.8738	16	20	9	3UTR		0	0
hsa-miR-193b-3p	NM_001385390	ARHGAP27	AACTGGCCCTCAAAGTCCCGCT#GGCTGGCTGTGGGCCAGTTT#(((((((((....((.((.(((#))).))))..))))))))).	2560	2580	1	-23.3	1	6.741103e-06	0.353	2.5338849999999997	2.495	-12.8738	16	20	9	3UTR		0	0
hsa-miR-193b-3p	NM_001385466	SIGLECL1	AACTGGCCCTCAAAGTCCCGCT#AGTTCCAAGAGAACAGGGACTTTGTCTGCCTTGTTT#(((.(((...(((((((((...#.)))))))))...)))..))).	1489	1525	1	-21	0	3.379443e-05	0.574	0	0	-11.5821	15	22	9	3UTR		0	0
hsa-miR-193b-3p	NM_001385467	SIGLECL1	AACTGGCCCTCAAAGTCCCGCT#AGTTCCAAGAGAACAGGGACTTTGTCTGCCTTGTTT#(((.(((...(((((((((...#.)))))))))...)))..))).	1301	1337	1	-21	0	3.379443e-05	0.574	0	0	-11.5821	15	22	9	3UTR		0	0
hsa-miR-193b-3p	NM_001385683	SLC6A20	AACTGGCCCTCAAAGTCCCGCT#GGTGGGCTATGAAAGCCGGTC#.((((((..(((.((.((((((#)))))))).)))..)))))).	2153	2174	1	-23.1	1	0.000296748	0.485	2.51241	2.2377048637500003	-8.68553	17	21	8	3UTR		0	0
hsa-miR-193b-3p	NM_001385704	ELAVL2	AACTGGCCCTCAAAGTCCCGCT#AGTATTTATTTTGTAATTATGATTTGGGTTGGGGAAGGGGGGGCTAC#...((((((((....(((((((#.))).))))....)))))))).	1782	1829	1	-21.6	0	0.00833706	0.618	0	0	-12.7428	15	22	8	3UTR		0	0
hsa-miR-193b-3p	NM_001385994	FAM13B	AACTGGCCCTCAAAGTCCCGCT#GGTGGGGGGTGAGGGAAAACCTGGTA#.(((((((((((...(((((((#)))))))..)))))).....))))).	4883	4909	1	-22	1	0.00179432	0.515	0	0	-6.67474	18	26	7	3UTR		0	0
hsa-miR-193b-3p	NM_001386	DPYSL2	AACTGGCCCTCAAAGTCCCGCT#GTGGGGCTGGGGAGGGGCCGGG#..(((((((((..((((((((.#))))))))...))))).)))).	2462	2484	1	-31.1	1	1.053748e-05	0.559	0.3216	0.663329	-9.59293	17	22	8	3UTR		0	0
hsa-miR-193b-3p	NM_001386053	OR2AG2	AACTGGCCCTCAAAGTCCCGCT#AGCGGGGCATAGTTGTGGGTGCCTGTA#.((.(((((((((.((((((((#))))))))....))).))).))).)).	2606	2633	1	-24	0	0.00011599	0.456	0	0	-7.68219	19	27	8	3UTR		0	0
hsa-miR-193b-3p	NM_001386081	SPECC1	AACTGGCCCTCAAAGTCCCGCT#GGTGGGGGATGGTGGGCCAA#...((((((.(....(((((((#)))))))....).)))))).	3635	3655	1	-24.3	0	0.000997767	0.382	0	0	-13.9853	14	20	7	3UTR		0	0
hsa-miR-193b-3p	NM_001386104	OR1A1	AACTGGCCCTCAAAGTCCCGCT#AGCGGGTTGGGGGCAAGA#..((.((((((((...((((((#)))))))))))))).)).	3486	3504	1	-24.8	0	0.00890321	0.456	0	0	-10.9014	16	18	14	3UTR		0	0
hsa-miR-193b-3p	NM_001386140	MTTP	AACTGGCCCTCAAAGTCCCGCT#GGAGTTGGGGGCCCAGG#..(((((((((((..(((....#))).))))))))).)).	3262	3279	1	-21.7	1	0.000329096	0.588	0	0	-6.54929	14	17	9	3UTR		0	0
hsa-miR-193b-3p	NM_001386290	NCAM1	AACTGGCCCTCAAAGTCCCGCT#GTGTTTCTTTGGGGGTTAGA#..(((((((((((((...(((.#)))...))))))))))))).	3755	3775	1	-23	1	0.00335346	0.574	0	0	-5.19005	16	20	13	3UTR		0	0
hsa-miR-193b-3p	NM_001386292	NCAM1	AACTGGCCCTCAAAGTCCCGCT#GTGTTTCTTTGGGGGTTAGA#..(((((((((((((...(((.#)))...))))))))))))).	3725	3745	1	-23	1	0.00335346	0.574	0	0	-5.19005	16	20	13	3UTR		0	0
hsa-miR-193b-3p	NM_001386435	CXCR6	AACTGGCCCTCAAAGTCCCGCT#TGGGACTGGGGCTGAAGGTTG#((((((((((...(((((((..#)))))))))))))...)))).	1486	1507	1	-21.8	1	0.0056151	0.471	0	0	-11.3983	17	21	13	3UTR		0	0
hsa-miR-193b-3p	NM_001386435	CXCR6	AACTGGCCCTCAAAGTCCCGCT#AGCACCAGGGACTATGAATGGGCA#.....(((((((.((((((...#.)))))).)))..)))).	1737	1761	1	-21.3	0	0.00438064	0.618	0	0	-14.9547	13	18	6	3UTR		0	0
hsa-miR-193b-3p	NM_001386437	CXCR6	AACTGGCCCTCAAAGTCCCGCT#TGGGACTGGGGCTGAAGGTTG#((((((((((...(((((((..#)))))))))))))...)))).	1735	1756	1	-21.8	1	0.0056151	0.471	0	0	-11.3983	17	21	13	3UTR		0	0
hsa-miR-193b-3p	NM_001386437	CXCR6	AACTGGCCCTCAAAGTCCCGCT#AGCACCAGGGACTATGAATGGGCA#.....(((((((.((((((...#.)))))).)))..)))).	1986	2010	1	-21.3	0	0.00438064	0.618	0	0	-14.9547	13	18	6	3UTR		0	0
hsa-miR-193b-3p	NM_001386677	ACAT1	AACTGGCCCTCAAAGTCCCGCT#AGTGTGACTACTGTGGGTCAGC#..(((((((.((.((((.((((#)))).))))..)).))))))).	1401	1423	1	-21.9	1	1.091617e-06	0.603	0	0	-7.48864	17	22	7	3UTR		0	0
hsa-miR-193b-3p	NM_001386678	ACAT1	AACTGGCCCTCAAAGTCCCGCT#AGTGTGACTACTGTGGGTCAGC#..(((((((.((.((((.((((#)))).))))..)).))))))).	1065	1087	1	-21.9	1	1.091617e-06	0.603	0	0	-7.48864	17	22	7	3UTR		0	0
hsa-miR-193b-3p	NM_001386681	ACAT1	AACTGGCCCTCAAAGTCCCGCT#AGTGTGACTACTGTGGGTCAGC#..(((((((.((.((((.((((#)))).))))..)).))))))).	1466	1488	1	-21.9	1	1.091617e-06	0.603	0	0	-7.48864	17	22	7	3UTR		0	0
hsa-miR-193b-3p	NM_001386685	ACAT1	AACTGGCCCTCAAAGTCCCGCT#AGTGTGACTACTGTGGGTCAGC#..(((((((.((.((((.((((#)))).))))..)).))))))).	1474	1496	1	-21.9	1	1.091617e-06	0.603	0	0	-7.48864	17	22	7	3UTR		0	0
hsa-miR-193b-3p	NM_001386879	SLCO1A2	AACTGGCCCTCAAAGTCCCGCT#GGTGGGAGAAGTGGGTGTCAA#...((((.((((...(((((((#)))))))....)))).)))).	3353	3374	1	-19.8	0	0.0465251	0.603	0	0	-11.7096	15	21	7	3UTR		0	0
hsa-miR-193b-3p	NM_001386884	PCDHGC4	AACTGGCCCTCAAAGTCCCGCT#AGCAGGAAGGGTGGGCCAGC#..(((((((.(....(((.(((#))).)))...).))))))).	1658	1678	1	-23	1	5.084346e-06	0.338	0	0	-12.4277	14	20	7	3UTR		0	0
hsa-miR-193b-3p	NM_001386889	MBNL3	AACTGGCCCTCAAAGTCCCGCT#AGGGGTATTTAGGGCCAC#...(((((((.(((..(((.((#)))))..)))))))))).	4667	4685	1	-20.7	0	0.000944978	0.603	0	0	-10.3078	15	18	10	3UTR		1	0
hsa-miR-193b-3p	NM_001386911	MBNL3	AACTGGCCCTCAAAGTCCCGCT#AGGGGTATTTAGGGCCAC#...(((((((.(((..(((.((#)))))..)))))))))).	3787	3805	1	-20.7	0	0.000944978	0.603	0	0	-10.3078	15	18	10	3UTR		1	0
hsa-miR-193b-3p	NM_001386938	SLCO1A2	AACTGGCCCTCAAAGTCCCGCT#GGTGGGAGAAGTGGGTGTCAA#...((((.((((...(((((((#)))))))....)))).)))).	3078	3099	1	-19.8	0	0.0465251	0.603	0	0	-11.7096	15	21	7	3UTR		0	0
hsa-miR-193b-3p	NM_001386974	KCNN1	AACTGGCCCTCAAAGTCCCGCT#GGGGGGAAACTGAGGCCCAGA#..((((.(((((...((((.((#)).))))...))))).)))).	2679	2700	1	-24.1	0	0.00423505	0.412	0	0	-9.38211	15	21	5	3UTR		0	0
hsa-miR-193b-3p	NM_001386975	KCNN1	AACTGGCCCTCAAAGTCCCGCT#GGGGGGAAACTGAGGCCCAGA#..((((.(((((...((((.((#)).))))...))))).)))).	2688	2709	1	-24.1	0	0.00423505	0.412	0	0	-9.38211	15	21	5	3UTR		0	0
hsa-miR-193b-3p	NM_001386976	KCNN1	AACTGGCCCTCAAAGTCCCGCT#GGGGGGAAACTGAGGCCCAGA#..((((.(((((...((((.((#)).))))...))))).)))).	2680	2701	1	-24.1	0	0.00423505	0.412	0	0	-9.38211	15	21	5	3UTR		0	0
hsa-miR-193b-3p	NM_001386977	KCNN1	AACTGGCCCTCAAAGTCCCGCT#GGGGGGAAACTGAGGCCCAGA#..((((.(((((...((((.((#)).))))...))))).)))).	2670	2691	1	-24.1	0	0.00423505	0.412	0	0	-9.38211	15	21	5	3UTR		0	0
hsa-miR-193b-3p	NM_001387033	GRAMD1B	AACTGGCCCTCAAAGTCCCGCT#GGCCTGGGGCTTGGGTGCCACGTG#.((((((.(((.((((((((((#)))..)))))))))).)))).)).	6986	7010	1	-22.9	1	4.231046e-06	0.441	0	0	-9.45376	19	24	10	3UTR		0	0
hsa-miR-193b-3p	NM_001387034	GRAMD1B	AACTGGCCCTCAAAGTCCCGCT#GGCCTGGGGCTTGGGTGCCACGTG#.((((((.(((.((((((((((#)))..)))))))))).)))).)).	7117	7141	1	-22.9	1	4.231046e-06	0.441	0	0	-9.45376	19	24	10	3UTR		0	0
hsa-miR-193b-3p	NM_001387249	TMEM218	AACTGGCCCTCAAAGTCCCGCT#AGAGAACAGGTAACCACTGAGAGTCATGGGCTGGTGAGGGCCAGG#..((((((((((.(((((.(((#.)))...)))))..)))))))))).	2162	2207	1	-29.9	1	2.395674e-06	0.5	0	0	-6.24613	18	25	10	3UTR		0	0
hsa-miR-193b-3p	NM_001387274	DCDC1	AACTGGCCCTCAAAGTCCCGCT#AGCAACATGATGGGGACATGAGGTTCAGTTC#((((((.(((((..(((((...#.))))).))))).)))))).	6291	6322	1	-22.8	0	0.0104877	0.471	0	0	-7.62723	16	20	6	3UTR		0	0
hsa-miR-193b-3p	NM_001387388	DNAJA4	AACTGGCCCTCAAAGTCCCGCT#GGGGTGACTTGAGGGTCT#....(((((((.(((((((.(.#).)).)))))))))))).	2128	2146	1	-24.3	0	2.873782e-05	0.485	0	0	-12.8934	15	18	12	3UTR		0	0
hsa-miR-193b-3p	NM_001387572	ZNF320	AACTGGCCCTCAAAGTCCCGCT#AGCACTTTGAGAGGCCAA#...(((((((((((((...(((#))))))))))).))))).	2234	2252	1	-22	0	0.00996281	0.515	0	0	-6.51454	16	18	11	3UTR		0	0
hsa-miR-193b-3p	NM_001387736	DMTN	AACTGGCCCTCAAAGTCCCGCT#GGTGGGAAGCGGCCAGG#..((((((((.....(((((((#))))))))).)))))).	1582	1599	1	-22.8	1	3.896721e-06	0.368	0	0	-14.01	15	17	9	3UTR		0	0
hsa-miR-193b-3p	NM_001387777	TNS1	AACTGGCCCTCAAAGTCCCGCT#GGTCTTCTGAGACTGGCCAGGAGAGGGATGGTGGGGCCAGTG#.((((((((.((..(((((.((#.)).)))))..)))))))))).	9058	9100	1	-29.4	1	0.00112051	0.368	0	0	-7.1818	17	22	10	3UTR		0	0
hsa-miR-193b-3p	NM_001387836	CNOT6L	AACTGGCCCTCAAAGTCCCGCT#AGTGGGACGAGGGTGGT#...(.((((((...((((((((#)))))))))))))).).	4081	4098	1	-24	0	0.0197986	0.544	0	0	-16.1264	15	17	14	3UTR		0	0
hsa-miR-193b-3p	NM_001387836	CNOT6L	AACTGGCCCTCAAAGTCCCGCT#GCCTAGGAGGGGCCAGTTG#((((((((((.....(((.((.#))...))))))))))))).	3574	3593	1	-21.8	1	0.000126551	0.574	0	0	-12.9906	15	19	13	3UTR		0	0
hsa-miR-193b-3p	NM_001387837	CNOT6L	AACTGGCCCTCAAAGTCCCGCT#AGTGGGACGAGGGTGGT#...(.((((((...((((((((#)))))))))))))).).	3451	3468	1	-24	0	0.0197986	0.544	0	0	-16.1264	15	17	14	3UTR		0	0
hsa-miR-193b-3p	NM_001387837	CNOT6L	AACTGGCCCTCAAAGTCCCGCT#GTTGGAATCTTTTTTTTGCCTAGGAGGGGCCAGTTG#((((((((((.....(((.((.#.))...))))))))))))).	2927	2963	1	-21.8	1	0.000126551	0.574	0	0	-12.9906	15	20	13	3UTR		0	0
hsa-miR-193b-3p	NM_001387840	CNOT6L	AACTGGCCCTCAAAGTCCCGCT#AGTGGGACGAGGGTGGT#...(.((((((...((((((((#)))))))))))))).).	3312	3329	1	-24	0	0.0197986	0.544	0	0	-16.1264	15	17	14	3UTR		0	0
hsa-miR-193b-3p	NM_001387840	CNOT6L	AACTGGCCCTCAAAGTCCCGCT#GTTGGAATCTTTTTTTTGCCTAGGAGGGGCCAGTTG#((((((((((.....(((.((.#.))...))))))))))))).	2788	2824	1	-21.8	1	0.000126551	0.574	0	0	-12.9906	15	20	13	3UTR		0	0
hsa-miR-193b-3p	NM_001387844	PRRC2C	AACTGGCCCTCAAAGTCCCGCT#AGGGGATTGGGAGGGGGGCGGGA#..((.((((((..((((((.((#)))))))).....)))))).)).	8977	9000	1	-23.4	0	0.0720148	0.515	0	0	-13.712	16	23	8	3UTR		0	0
hsa-miR-193b-3p	NM_001388181	ATF7IP	AACTGGCCCTCAAAGTCCCGCT#GGATTTTTAATATGAGGGCCAGC#..((((((((((((((((....#))))))......)))))))))).	5742	5765	1	-25.1	1	0.00065646	0.559	0	0	-4.957	16	23	10	3UTR		0	0
hsa-miR-193b-3p	NM_001388361	ATP2B3	AACTGGCCCTCAAAGTCCCGCT#GGTGGGCAGGGGGCTGGTTT#(((((((((((...(.((((((#))))))).))))))))))).	4426	4446	1	-25.5	1	0.00041251	0.456	0	0	-9.6634	18	20	11	3UTR		0	0
hsa-miR-193b-3p	NM_001388428	TMEM238L	AACTGGCCCTCAAAGTCCCGCT#GGTGGTCAAGTCCAGCCCAAGGACAGCAACTCTGAGGGTCAA#...(((((((((.(((...(((#.))).))).))))))))).	1273	1315	1	-20.4	0	1.685938e-05	0.485	0	0	-7.80367	15	19	9	3UTR		0	0
hsa-miR-193b-3p	NM_001389630	EXT2	AACTGGCCCTCAAAGTCCCGCT#GTGTGGAAGTCTGGGGGTTAGG#..((((((((((...((((((.#))).)))....)))))))))).	9507	9529	1	-22.9	1	0.000408209	0.544	0	0	-7.83842	16	22	10	3UTR		0	0
hsa-miR-193b-3p	NM_001391983	TRERF1	AACTGGCCCTCAAAGTCCCGCT#AGCGTGATTTCCTGGGCCGGTG#.((((((((...(((((.((((#)))).)))))...)))))))).	5629	5651	1	-25.5	1	0.00816049	0.441	0	0	-11.2074	17	22	8	3UTR		0	0
hsa-miR-193b-3p	NM_001392027	ITIH3	AACTGGCCCTCAAAGTCCCGCT#AGAGGGGCCTGTGGGAGGGGCTGGG#..((((((((.....((((((.#.)))))))))))))).	2171	2196	1	-22.6	1	0.000483016	0.422	0	0	-14.01	14	16	14	3UTR		0	0
hsa-miR-193b-3p	NM_001392042	JAKMIP3	AACTGGCCCTCAAAGTCCCGCT#GTGGGATTTAGCCATTTCGAGGCACCTAGAAGTTGAGGCAGCCAGC#..(((((((((((((((((((.#)))))))))........................)))))..))))).	4372	4418	1	-25.2	1	0.000217723	0.456	0	0	-4.957	19	46	9	3UTR		0	0
hsa-miR-193b-3p	NM_001392043	JAKMIP3	AACTGGCCCTCAAAGTCCCGCT#GTGGGATTTAGCCATTTCGAGGCACCTAGAAGTTGAGGCAGCCAGC#..(((((((((((((((((((.#)))))))))........................)))))..))))).	4079	4125	1	-25.2	1	0.000217723	0.456	0	0	-4.957	19	46	9	3UTR		0	0
hsa-miR-193b-3p	NM_001392047	JAKMIP3	AACTGGCCCTCAAAGTCCCGCT#GTGGGATTTAGCCATTTCGAGGCACCTAGAAGTTGAGGCAGCCAGC#..(((((((((((((((((((.#)))))))))........................)))))..))))).	4617	4663	1	-25.2	1	0.000217723	0.456	0	0	-4.957	19	46	9	3UTR		0	0
hsa-miR-193b-3p	NM_001392052	JAKMIP3	AACTGGCCCTCAAAGTCCCGCT#GTGGGATTTAGCCATTTCGAGGCACCTAGAAGTTGAGGCAGCCAGC#..(((((((((((((((((((.#)))))))))........................)))))..))))).	4108	4154	1	-25.2	1	0.000217723	0.456	0	0	-4.957	19	46	9	3UTR		0	0
hsa-miR-193b-3p	NM_001392056	JAKMIP3	AACTGGCCCTCAAAGTCCCGCT#GTGGGATTTAGCCATTTCGAGGCACCTAGAAGTTGAGGCAGCCAGC#..(((((((((((((((((((.#)))))))))........................)))))..))))).	4401	4447	1	-25.2	1	0.000217723	0.456	0	0	-4.957	19	46	9	3UTR		0	0
hsa-miR-193b-3p	NM_001392060	JAKMIP3	AACTGGCCCTCAAAGTCCCGCT#GTGGGATTTAGCCATTTCGAGGCACCTAGAAGTTGAGGCAGCCAGC#..(((((((((((((((((((.#)))))))))........................)))))..))))).	4395	4441	1	-25.2	1	0.000217723	0.456	0	0	-4.957	19	46	9	3UTR		0	0
hsa-miR-193b-3p	NM_001392061	JAKMIP3	AACTGGCCCTCAAAGTCCCGCT#GTGGGATTTAGCCATTTCGAGGCACCTAGAAGTTGAGGCAGCCAGC#..(((((((((((((((((((.#)))))))))........................)))))..))))).	3878	3924	1	-25.2	1	0.000217723	0.456	0	0	-4.957	19	46	9	3UTR		0	0
hsa-miR-193b-3p	NM_001392062	JAKMIP3	AACTGGCCCTCAAAGTCCCGCT#GTGGGATTTAGCCATTTCGAGGCACCTAGAAGTTGAGGCAGCCAGC#..(((((((((((((((((((.#)))))))))........................)))))..))))).	5224	5270	1	-25.2	1	0.000217723	0.456	0	0	-4.957	19	46	9	3UTR		0	0
hsa-miR-193b-3p	NM_001392065	JAKMIP3	AACTGGCCCTCAAAGTCCCGCT#GTGGGATTTAGCCATTTCGAGGCACCTAGAAGTTGAGGCAGCCAGC#..(((((((((((((((((((.#)))))))))........................)))))..))))).	3862	3908	1	-25.2	1	0.000217723	0.456	0	0	-4.957	19	46	9	3UTR		0	0
hsa-miR-193b-3p	NM_001392067	JAKMIP3	AACTGGCCCTCAAAGTCCCGCT#GTGGGATTTAGCCATTTCGAGGCACCTAGAAGTTGAGGCAGCCAGC#..(((((((((((((((((((.#)))))))))........................)))))..))))).	3656	3702	1	-25.2	1	0.000217723	0.456	0	0	-4.957	19	46	9	3UTR		0	0
hsa-miR-193b-3p	NM_001393393	ZBTB20	AACTGGCCCTCAAAGTCCCGCT#GCCTCTCTATCTCAAATCATTGCCTTCTTAGGGACTGGGGGCCAA#...((((((((..((((((...#.)))))))))))))).	23031	23076	1	-26.8	0	0.000395332	0.515	0	0	-11.1505	14	16	14	3UTR		0	0
hsa-miR-193b-3p	NM_001393404	TTC28	AACTGGCCCTCAAAGTCCCGCT#AGTGGATAGACTGACTGGCGTCCGGGGAGCCCAGGGTATGTGAGGGCCACGTG#.(((((((((((....((((((#.)))...)))....))))))))).)).	10957	11010	1	-26.2	1	4.580686e-06	0.353	0	0	-6.90779	17	27	9	3UTR		0	0
hsa-miR-193b-3p	NM_001393459	ANAPC15	AACTGGCCCTCAAAGTCCCGCT#GTGTATTATGGTTCCTTTGAGGCCAGC#..((((.((((((((..(((..#.)))...)))))))))))).	1353	1380	1	-20.1	0	9.222026e-05	0.529	0	0	-6.73374	15	20	12	3UTR		1	0
hsa-miR-193b-3p	NM_001393480	ANKMY1	AACTGGCCCTCAAAGTCCCGCT#GGCACCAGCTGGTGGGGGTGGAGGGCCAC#...((((((((..(.(((((((#.))))))).).)))))))).	1276	1305	1	-28.6	0	2.381444e-08	0.382	0	0	-11.8859	16	20	8	3UTR		0	0
hsa-miR-193b-3p	NM_001393484	ANKMY1	AACTGGCCCTCAAAGTCCCGCT#GGCACCAGCTGGTGGGGGTGGAGGGCCAC#...((((((((..(.(((((((#.))))))).).)))))))).	730	759	1	-28.6	0	2.381444e-08	0.382	0	0	-11.8859	16	20	8	3UTR		0	0
hsa-miR-193b-3p	NM_001393797	ABCC12	AACTGGCCCTCAAAGTCCCGCT#GGTGGGCTTGGGGTTGGTTC#((((((((((..(((.((((((#))))))))))))))))))).	4730	4750	1	-23	1	5.063136e-05	0.382	0	0	-10.3422	19	20	19	3UTR		0	0
hsa-miR-193b-3p	NM_001393798	ABCC12	AACTGGCCCTCAAAGTCCCGCT#GGTGGGCTTGGGGTTGGTTC#((((((((((..(((.((((((#))))))))))))))))))).	982	1002	1	-23	1	5.063136e-05	0.382	0	0	-10.3422	19	20	19	3UTR		0	0
hsa-miR-193b-3p	NM_001393798	ABCC12	AACTGGCCCTCAAAGTCCCGCT#AGATGGGATTTGAGGCTCACTGAGGTTAGTA#.((((((((((.((((((((((#)).)))))))))))).........)))))).	2921	2952	1	-19.6	1	0.00582457	0.515	0	0	-7.14013	20	31	12	3UTR		0	0
hsa-miR-193b-3p	NM_001393897	PLXNA4	AACTGGCCCTCAAAGTCCCGCT#GGGGAGGGGTTTGGGGCTGGTTT#(((((((((.((((.((((.((#)).).))).))))))))))))).	8551	8574	1	-24.7	1	0.0055973	0.456	0	0	-5.91553	19	23	13	3UTR		0	0
hsa-miR-193b-3p	NM_001393897	PLXNA4	AACTGGCCCTCAAAGTCCCGCT#AGCAGGGAAGAAGGGGGCTTTGTGGGGTCC#....(((((((((((((((.((#.))))))))))).)))))).	9170	9200	1	-25.1	0	3.586728e-06	0.544	0	0	-9.54656	17	20	11	3UTR		0	0
hsa-miR-193b-3p	NM_001393907	GPR61	AACTGGCCCTCAAAGTCCCGCT#GGCCGCTGGACACTCGGAGGGATATGGGGCTGGGGCCAGTTA#((((((((((...(((((((..#.))))))))))))))))).	2041	2083	1	-28.8	1	0.000185899	0.412	0	0	-11.3983	17	19	17	3UTR		0	0
hsa-miR-193b-3p	NM_001393938	ZNF888	AACTGGCCCTCAAAGTCCCGCT#GGTGGATCTCTTGAGGTCAGG#..((((.((((((((..(((((#)))))..)).)))))))))).	2998	3019	1	-20.5	0	6.791934e-05	0.426	0	0	-6.73374	17	21	10	3UTR		0	0
hsa-miR-193b-3p	NM_001393986	PRDM2	AACTGGCCCTCAAAGTCCCGCT#GGGACTTTGGTTTGACCCAGGGGTCAGC#..(((((((((((((((((...#)))))))))..........)))))))).	5732	5760	1	-27.4	1	7.082725e-07	0.426	0	0	-4.957	17	28	9	3UTR		0	0
hsa-miR-193b-3p	NM_001394	DUSP4	AACTGGCCCTCAAAGTCCCGCT#GGCGGGGAGGGACGGTA#.((((.(((((.....((((((#))))))))))).)))).	3961	3978	1	-22.7	0	0.00251198	0.471	2.435355166666667	2.02141	-12.1556	15	17	11	3UTR		0	0
hsa-miR-193b-3p	NM_001394010	PTOV1	AACTGGCCCTCAAAGTCCCGCT#GGCCTCTGCTCACAGGGATGTGGGGTCAGTG#.((((((((.((..(((((...#.))))).)))))))))).	1678	1709	1	-24.3	1	3.447682e-05	0.309	0	0	-7.1818	15	18	10	3UTR		0	0
hsa-miR-193b-3p	NM_001394169	SMIM38	AACTGGCCCTCAAAGTCCCGCT#GGTGGGACCGACCAAGAGTTTGAGGTGTCCAGG#..((((((((((((((((((((#))))))))..........))))))).).)))).	2372	2405	1	-27.1	1	0.00209843	0.441	0	0	-4.957	20	33	8	3UTR		0	0
hsa-miR-193b-3p	NM_001394174	KRBOX5	AACTGGCCCTCAAAGTCCCGCT#ACTCTTGAGGGCCAA#...(((((((((((((......#))).)))))))))).	4105	4120	1	-20.3	0	0.000339597	0.603	0	0	-6.51454	13	15	10	3UTR		0	0
hsa-miR-193b-3p	NM_001394198	ZNF746	AACTGGCCCTCAAAGTCCCGCT#GGCTGGGTTTGGGGGCCAAGTG#.(((((((((((((..((((((#))).)))))))))))))).)).	3498	3520	1	-26.8	1	2.305676e-06	0.441	0	0	-4.76182	19	22	14	3UTR		0	0
hsa-miR-193b-3p	NM_001394308	SCMH1	AACTGGCCCTCAAAGTCCCGCT#GGAGGGAGAGTGGGGGTCCAGG#..((((((((((...((((.((#)).))))...)))))).)))).	2202	2224	1	-26	1	0.00153584	0.368	0	0	-7.83842	16	22	6	3UTR		0	0
hsa-miR-193b-3p	NM_001394311	SCMH1	AACTGGCCCTCAAAGTCCCGCT#GGAGGGAGAGTGGGGGTCCAGG#..((((((((((...((((.((#)).))))...)))))).)))).	2562	2584	1	-26	1	0.00153584	0.368	0	0	-7.83842	16	22	6	3UTR		0	0
hsa-miR-193b-3p	NM_001394324	SPIRE1	AACTGGCCCTCAAAGTCCCGCT#GTGTGGCTTTGGAAGCCAGTA#.((((((..((((((((.(((.#))).))))))))..)))))).	1992	2013	1	-23.3	1	1.561525e-06	0.603	0	0	-7.16335	17	21	8	3UTR		0	0
hsa-miR-193b-3p	NM_001394325	SPIRE1	AACTGGCCCTCAAAGTCCCGCT#GTGTGGCTTTGGAAGCCAGTA#.((((((..((((((((.(((.#))).))))))))..)))))).	2238	2259	1	-23.3	1	1.561525e-06	0.603	0	0	-7.16335	17	21	8	3UTR		0	0
hsa-miR-193b-3p	NM_001394336	SPRED3	AACTGGCCCTCAAAGTCCCGCT#GGCGGAGGGATTGGGGGCTGGG#..(((((((((((..(((((((#))))).))..))))))))))).	4198	4220	1	-27.9	1	0.00157412	0.294	0	0	-6.54929	18	22	11	3UTR		0	0
hsa-miR-193b-3p	NM_001394345	FAM177B	AACTGGCCCTCAAAGTCCCGCT#TGGGAGTTTTTGGCTGAAATCCTCTGTCATGGGACGAGGGTACAGTA#.((((((((((...((((((..#.)))))))))))).)))).	1058	1105	1	-23.6	1	7.617669e-07	0.588	0	0	-9.2861	16	19	12	3UTR		0	0
hsa-miR-193b-3p	NM_001394365	SSBP3	AACTGGCCCTCAAAGTCCCGCT#AGCGTCATCGTGTGCACCGGCTTGGGGGGCTGGA#..(((((((((.(((((..((.#.))...))))).))))))))).	2035	2069	1	-22.3	1	1.583186e-07	0.485	0	0	-8.3038	16	22	9	3UTR		0	0
hsa-miR-193b-3p	NM_001394432	SUN2	AACTGGCCCTCAAAGTCCCGCT#GTGGGGCAGTTGGTGGGGGCTGGG#..((((((((((..(((((((.#)))))))......)))))))))).	3371	3395	1	-28.2	1	0.000487829	0.412	0	0	-7.10297	17	24	10	3UTR		0	0
hsa-miR-193b-3p	NM_001394440	SUN2	AACTGGCCCTCAAAGTCCCGCT#GTGGGGCAGTTGGTGGGGGCTGGG#..((((((((((..(((((((.#)))))))......)))))))))).	3233	3257	1	-28.2	1	0.000487829	0.412	0	0	-7.10297	17	24	10	3UTR		0	0
hsa-miR-193b-3p	NM_001394526	ARNTL2	AACTGGCCCTCAAAGTCCCGCT#GCAGGGGCTTCGTGGGCAAGG#..((.((((.(.(((((((((.#)).))))))).).)))).)).	4004	4025	1	-24.1	0	0.00055294	0.485	0	0	-13.6653	16	21	7	3UTR	MIRT016419	0	0
hsa-miR-193b-3p	NM_001394582	CCR6	AACTGGCCCTCAAAGTCCCGCT#AGCAGGATTGGCCGGCTAGTG#.(((((((.....(((((.(((#))).)))))....))))))).	1896	1917	1	-20.1	1	0.00407909	0.544	0	0	-13.5529	15	21	7	3UTR		0	0
hsa-miR-193b-3p	NM_001394755	TBKBP1	AACTGGCCCTCAAAGTCCCGCT#GGCGGGGAAGGGGCCAA#...(((((((.....(((((((#)))))))..))))))).	3199	3216	1	-24.9	0	0.00013036	0.368	0	0	-15.5675	14	17	7	3UTR		0	0
hsa-miR-193b-3p	NM_001394783	CCR5	AACTGGCCCTCAAAGTCCCGCT#GGGGTGGATTTGGGTTGGAAGTGAGGGTCAGA#..(((((((((((((((((.((#)).).))))))..........)))))))))).	2117	2149	1	-24.4	1	0.0369795	0.485	0	0	-4.957	19	32	10	3UTR		0	0
hsa-miR-193b-3p	NM_001394783	CCR5	AACTGGCCCTCAAAGTCCCGCT#GTGGCCAAAGGAGGGTCAGG#..(((((((((......((((.#))))......))))))))).	1931	1951	1	-23.3	1	0.000320219	0.485	0	0	-11.4183	13	20	9	3UTR		0	0
hsa-miR-193b-3p	NM_001394838	KLC1	AACTGGCCCTCAAAGTCCCGCT#AGCCATGGGACTTTAGGGCCGAGG#..((((((((.(((((((((((#)))...)))))))))))))).)).	4311	4335	1	-27.7	1	0.000779807	0.353	0	0	-7.78178	19	24	14	3UTR		0	0
hsa-miR-193b-3p	NM_001394838	KLC1	AACTGGCCCTCAAAGTCCCGCT#GGTGAGGCAATGAGGGTCAGG#..((((((((((..(((.((((#)))).)))..)))))))))).	5341	5362	1	-26.1	1	0.00016634	0.485	0	0	-7.10297	17	21	10	3UTR		0	0
hsa-miR-193b-3p	NM_001394841	KLC1	AACTGGCCCTCAAAGTCCCGCT#AGCCATGGGACTTTAGGGCCGAGG#..((((((((.(((((((((((#)))...)))))))))))))).)).	4284	4308	1	-27.7	1	0.000779807	0.353	0	0	-7.78178	19	24	14	3UTR		0	0
hsa-miR-193b-3p	NM_001394841	KLC1	AACTGGCCCTCAAAGTCCCGCT#GGTGAGGCAATGAGGGTCAGG#..((((((((((..(((.((((#)))).)))..)))))))))).	5314	5335	1	-26.1	1	0.00016634	0.485	0	0	-7.10297	17	21	10	3UTR		0	0
hsa-miR-193b-3p	NM_001394941	EXOC3L4	AACTGGCCCTCAAAGTCCCGCT#GGCGGGGGGGGGCCT#....(((((((....(((((((#)))))))))))))).	2842	2857	1	-25.4	0	1.166327e-08	0.309	0	0	-15.7748	14	15	14	3UTR		0	0
hsa-miR-193b-3p	NM_001394943	SPDYE16	AACTGGCCCTCAAAGTCCCGCT#GGTGGGGGGAGGGGGGTGGGG#..((.((((((....(((((((#)))))))....)))))).)).	1815	1836	1	-25.4	0	7.478208e-05	0.382	0	0	-15.3043	15	21	7	3UTR		0	0
hsa-miR-193b-3p	NM_001394953	SPDYE18	AACTGGCCCTCAAAGTCCCGCT#GGTGGGGGGAGGGGGGTGGGG#..((.((((((....(((((((#)))))))....)))))).)).	1756	1777	1	-25.4	0	9.866056e-05	0.382	0	0	-15.3043	15	21	7	3UTR		0	0
hsa-miR-193b-3p	NM_001395068	PLEKHS1	AACTGGCCCTCAAAGTCCCGCT#CTTTGGGAGGCCGGG#..(((((((((((((.......#))))))).)))))).	3714	3729	1	-20.7	1	5.116073e-05	0.441	0	0	-5.19005	13	15	7	3UTR		0	0
hsa-miR-193b-3p	NM_001395198	ZBTB34	AACTGGCCCTCAAAGTCCCGCT#TGGGACTGTTAAGGGGCAGA#..(((.((((...(((((((..#)))))))....)))).))).	4405	4425	1	-23.8	0	0.000828632	0.632	0	0	-14.3187	14	20	7	3UTR		0	0
hsa-miR-193b-3p	NM_001395205	TDRD1	AACTGGCCCTCAAAGTCCCGCT#GGTGGGAGGATCCCTTGAGGCCAGG#..((((.((((((.((((((((#))))))).....).)))))))))).	7333	7358	1	-24.2	0	0.000341644	0.471	0	0	-7.35753	18	25	10	3UTR		0	0
hsa-miR-193b-3p	NM_001395205	TDRD1	AACTGGCCCTCAAAGTCCCGCT#AGTGGGCTGCACTGAGGGTA#.....(((((((..((((((((#))))))..))..))))))).	4069	4089	1	-21.7	0	0.000192992	0.588	0	0	-15.8116	15	20	7	3UTR		0	0
hsa-miR-193b-3p	NM_001395214	TEAD3	AACTGGCCCTCAAAGTCCCGCT#TGGGGCGGGGGCTGGC#..(((((((((...((((((..#))))))))))))))).	2204	2220	1	-23.3	1	1.081735e-07	0.338	0	0	-10.4498	15	16	15	3UTR		0	0
hsa-miR-193b-3p	NM_001395232	NOTCH2NLA	AACTGGCCCTCAAAGTCCCGCT#AGTGGGAGATACGTGGCACAGGGGTCAGTG#.(((((((((((...(((((((#)))))))......)).....))))))))).	5977	6007	1	-23.9	1	0.000298528	0.471	0	0	-6.67474	18	30	9	3UTR		0	0
hsa-miR-193b-3p	NM_001395232	NOTCH2NLA	AACTGGCCCTCAAAGTCCCGCT#GGGAGCTTGGGGCCTGGTG#.((((((((.(((..((((...#))))..)))))))).))).	1734	1753	1	-24	1	0.000475157	0.456	0	0	-6.62812	15	19	8	3UTR		0	0
hsa-miR-193b-3p	NM_001395243	TMEM217	AACTGGCCCTCAAAGTCCCGCT#CGGGAGAGGGCAGGTTG#((((.((((((....(((((..#))))))))))).)))).	1861	1878	1	-22.3	0	0.000522527	0.544	0	0	-14.2848	15	17	11	3UTR		0	0
hsa-miR-193b-3p	NM_001395259	PDE1A	AACTGGCCCTCAAAGTCCCGCT#GGTGGGATGCTGAGGAGCTGGTTG#((((((((((((..((((((((#))))))))..))))).))))))).	2257	2281	1	-30.5	1	0.000609707	0.485	0	0	-6.08354	20	24	8	3UTR		0	0
hsa-miR-193b-3p	NM_001395377	TMEM217B	AACTGGCCCTCAAAGTCCCGCT#CGGGAGAGGGCAGGTTG#((((.((((((....(((((..#))))))))))).)))).	1379	1396	1	-22.3	0	0.000522527	0.544	0	0	-14.2848	15	17	11	3UTR		0	0
hsa-miR-193b-3p	NM_001395378	TMEM217B	AACTGGCCCTCAAAGTCCCGCT#CGGGAGAGGGCAGGTTG#((((.((((((....(((((..#))))))))))).)))).	1294	1311	1	-22.3	0	0.000522527	0.544	0	0	-14.2848	15	17	11	3UTR		0	0
hsa-miR-193b-3p	NM_001395490	TRERF1	AACTGGCCCTCAAAGTCCCGCT#AGCGTGATTTCCTGGGCCGGTG#.((((((((...(((((.((((#)))).)))))...)))))))).	5873	5895	1	-25.5	1	0.00816049	0.441	0	0	-11.2074	17	22	8	3UTR		0	0
hsa-miR-193b-3p	NM_001395548	PLA2G4E	AACTGGCCCTCAAAGTCCCGCT#GTGGGTAAATGAGGTTGGGGGCCAGG#..(((((((((((...(((((.#))))).........))))))))))).	3605	3631	1	-28.3	1	5.26774e-05	0.338	0	0	-6.78234	16	26	11	3UTR		0	0
hsa-miR-193b-3p	NM_001395587	PCDH11Y	AACTGGCCCTCAAAGTCCCGCT#GGGGCGGTTGGGGTTGGG#..(((((((.(((.(((((...#)))))..)))))))))).	5798	5816	1	-21.8	1	0.0213264	0.544	0	0	-7.05635	15	18	10	3UTR		0	0
hsa-miR-193b-3p	NM_001395938	TMEM217B	AACTGGCCCTCAAAGTCCCGCT#CGGGAGAGGGCAGGTTG#((((.((((((....(((((..#))))))))))).)))).	1299	1316	1	-22.3	0	0.000522527	0.544	0	0	-14.2848	15	17	11	3UTR		0	0
hsa-miR-193b-3p	NM_001395959	LOC122455338	AACTGGCCCTCAAAGTCCCGCT#GGTGGGACAGGGGAGTTTGGAAACCAGGGCTAGA#..((((((((((((((((((((#)))))))).......))))......)))))))).	1189	1223	1	-24.9	1	0.00359882	0.456	0	0	-4.957	20	34	8	3UTR		0	0
hsa-miR-193b-3p	NM_001395961	LOC344065	AACTGGCCCTCAAAGTCCCGCT#AGTGCATGCAGATGGGGGGCCAGTTG#(((((((((((...(((..((.#.)).))).))))))))))).	3393	3419	1	-23.4	1	9.121859e-05	0.485	0	0	-9.43035	16	20	11	3UTR		0	0
hsa-miR-193b-3p	NM_001396072	NOTCH2NLR	AACTGGCCCTCAAAGTCCCGCT#GGGAGCTTGGGGCCTGGTG#.((((((((.(((..((((...#))))..)))))))).))).	1481	1500	1	-24	1	0.000475982	0.456	0	0	-6.62812	15	19	8	3UTR		0	0
hsa-miR-193b-3p	NM_001397	ECE1	AACTGGCCCTCAAAGTCCCGCT#AGCCAGGGGACATTGTGAGGGGAAGATTCCTCCACCCAGTC#.(((((((((((..((((((((#)))...)))))....))))))..............))))).	4123	4164	1	-23.6	1	0.0174854	0.397	4.587695120000001	3.37668	-5.9393	19	41	6	3UTR		0	0
hsa-miR-193b-3p	NM_001398493	CHST9	AACTGGCCCTCAAAGTCCCGCT#GTGGGATTTTGACCAGC#..((((...((((((((((((.#)))))))))))))))).	8635	8652	1	-23.2	0	0.000105095	0.5	0	0	-9.87071	16	17	16	3UTR		0	1
hsa-miR-193b-3p	NM_001400026	ATP8A1	AACTGGCCCTCAAAGTCCCGCT#GGTGAGACTTGGGGTTTGAGGGACAGG#..(((.((((((((.(((((..#.))))))))))))).))).	5995	6022	1	-23.5	0	5.952771e-06	0.544	0	0	-7.59341	16	19	13	3UTR		0	0
hsa-miR-193b-3p	NM_001400225	MGA	AACTGGCCCTCAAAGTCCCGCT#GTGGCTTTTGAGGGTCAGC#..(((((((((((((..((((.#)))).))))))))))))).	11468	11487	1	-26.2	1	7.530668e-06	0.5	0	0	-5.19005	17	19	13	3UTR		0	0
hsa-miR-193b-3p	NM_001400616	NCAM1	AACTGGCCCTCAAAGTCCCGCT#GTGTTTCTTTGGGGGTTAGA#..(((((((((((((...(((.#)))...))))))))))))).	3833	3853	1	-23	1	0.00335346	0.574	0	0	-5.19005	16	20	13	3UTR		0	0
hsa-miR-193b-3p	NM_001400911	SLC9A6	AACTGGCCCTCAAAGTCCCGCT#GGAGGGGCTGGGGTGGGCAGA#..(((.(((((..((((((.((#)).)))))).))).)).))).	2839	2860	1	-22.4	0	0.00222177	0.456	0	0	-11.4939	16	21	6	3UTR		0	0
hsa-miR-193b-3p	NM_001401599	NMNAT3	AACTGGCCCTCAAAGTCCCGCT#AGCGGCCCCTGAGGGTCAGA#..((((((((((.....(((((#)))))....)))))))))).	1829	1849	1	-25.4	1	1.181127e-05	0.5	0	0	-8.07147	15	20	10	3UTR		0	0
hsa-miR-193b-3p	NM_001401600	NMNAT3	AACTGGCCCTCAAAGTCCCGCT#AGCGGCCCCTGAGGGTCAGA#..((((((((((.....(((((#)))))....)))))))))).	1547	1567	1	-25.4	1	1.181127e-05	0.5	0	0	-8.07147	15	20	10	3UTR		0	0
hsa-miR-193b-3p	NM_001401605	NMNAT3	AACTGGCCCTCAAAGTCCCGCT#AGCGGCCCCTGAGGGTCAGA#..((((((((((.....(((((#)))))....)))))))))).	1609	1629	1	-25.4	1	1.181127e-05	0.5	0	0	-8.07147	15	20	10	3UTR		0	0
hsa-miR-193b-3p	NM_001401608	NMNAT3	AACTGGCCCTCAAAGTCCCGCT#AGCGGCCCCTGAGGGTCAGA#..((((((((((.....(((((#)))))....)))))))))).	1637	1657	1	-25.4	1	1.181127e-05	0.5	0	0	-8.07147	15	20	10	3UTR		0	0
hsa-miR-193b-3p	NM_001401610	NMNAT3	AACTGGCCCTCAAAGTCCCGCT#AGCGGCCCCTGAGGGTCAGA#..((((((((((.....(((((#)))))....)))))))))).	1427	1447	1	-25.4	1	1.181127e-05	0.5	0	0	-8.07147	15	20	10	3UTR		0	0
hsa-miR-193b-3p	NM_014245	RNF7	AACTGGCCCTCAAAGTCCCGCT#AGACGGGATTTCCCCATGTTGGCCAGG#..((((((..((((((((((((#)).)))))))).....))..)))))).	1270	1297	1	-24.1	1	0.00128844	0.515	4.31328	3.797182115000001	-7.2559	18	27	8	3UTR		0	0
hsa-miR-193b-3p	NM_014252	SLC25A15	AACTGGCCCTCAAAGTCCCGCT#AGGGGTGGCCCAGAGGGTCAGG#..(((((((((...(((((.((#)).)).)))...))))))))).	2037	2059	1	-25.4	1	7.833403e-08	0.456	0.1472598788888889	0.3759465905000001	-10.4498	16	22	9	3UTR	MIRT016548	0	0
hsa-miR-193b-3p	NM_014263	YME1L1	AACTGGCCCTCAAAGTCCCGCT#GGCGGGTGGATTGCTTGAGGCCAGG#..((((.((((.((((((((((#))))))......)))))))))))).	2858	2883	1	-25.3	0	0.00182782	0.382	0	0	-9.84749	18	25	12	3UTR		0	0
hsa-miR-193b-3p	NM_014281	PUF60	AACTGGCCCTCAAAGTCCCGCT#AGTGGTGTCCCCGGGGCCAGG#..((((((((....(.((((((#))))).).)...)))))))).	1703	1724	1	-22.6	1	2.333186e-06	0.368	2.5795535375000007	2.16796	-13.5076	15	21	8	3UTR		0	0
hsa-miR-193b-3p	NM_014286	NCS1	AACTGGCCCTCAAAGTCCCGCT#GCAGGGATGGGGTCAGTG#.(((((((((....(((((((.#)).)))))))))))))).	3005	3023	1	-24.6	1	0.00205716	0.382	-0.565759	-0.538145	-12.1109	16	18	14	3UTR		0	0
hsa-miR-193b-3p	NM_014309	RBFOX2	AACTGGCCCTCAAAGTCCCGCT#GCAGATTTTCCCCCAGATACTAGGAGGAAAGGGACTTTGGGGGGTGGG#..(((.(((((((((((((...#.))))))))))))).))).	4971	5019	1	-29.5	0	0.0261052	0.471	2.2452280000000004	0.9582990316500002	-6.85796	16	19	13	3UTR		0	0
hsa-miR-193b-3p	NM_014320	HEBP2	AACTGGCCCTCAAAGTCCCGCT#AGCAGGGAGTAATGAGGACCAGTTG#((((((.(((((.(.(((((((#))).)))).)..))))).)))))).	8058	8083	1	-25.7	0	0.00136148	0.544	-0.417553	0.018247337500000023	-7.50584	19	25	6	3UTR		0	0
hsa-miR-193b-3p	NM_014329	EDC4	AACTGGCCCTCAAAGTCCCGCT#GGCCCCCATCTCTGGGGTGTTTGGGGGTCAGG#..((((((((((((.(((((..#.)))))..)))))))))))).	4511	4543	1	-26.9	1	0.000109202	0.338	0.14290891666666666	0.474213	-5.69245	17	21	12	3UTR		0	0
hsa-miR-193b-3p	NM_014337	PPIL2	AACTGGCCCTCAAAGTCCCGCT#GGGGCTTCTGAAGGCTGGTG#.(((((((.((((((((((...#))))))).))).))))))).	2323	2343	1	-25	1	0.0015876	0.485	-0.0931823	-0.480603	-4.84971	17	20	7	3UTR		0	0
hsa-miR-193b-3p	NM_014392	NSG1	AACTGGCCCTCAAAGTCCCGCT#GGTGGGGGTGGGGGACTGGTG#.(((((((((((...(((((((#))))))).)))))).))))).	1649	1670	1	-24.4	1	0.00752071	0.441	0.479886	0.350048	-6.67474	18	21	7	3UTR	MIRT016351	0	0
hsa-miR-193b-3p	NM_014398	LAMP3	AACTGGCCCTCAAAGTCCCGCT#AGACGGGGTTTCACCATGTTGGCCAGA#..((((((..((((((((((((#)).)))))))).....))..)))))).	2019	2046	1	-20	1	0.00602117	0.574	2.2579988166666665	1.5526818762499999	-7.2559	18	27	8	3UTR		0	0
hsa-miR-193b-3p	NM_014413	EIF2AK1	AACTGGCCCTCAAAGTCCCGCT#GGAGCTTGAGGGCCGTGTTA#(((((((((((((..(((....#)))..)))))))))).))).	2974	2994	1	-25.3	1	0.00129662	0.529	5.014069628571428	3.8197309649999998	-5.52986	16	20	10	3UTR		0	1
hsa-miR-193b-3p	NM_014452	TNFRSF21	AACTGGCCCTCAAAGTCCCGCT#GGTGGGGTTTGTGGGTAGTG#.(((.((((.((((.(((((((#))))))))))).))))))).	3506	3526	1	-22.3	0	0.0217259	0.485	0.21912264285714286	1.42976	-9.89032	18	20	11	3UTR	MIRT016429	1	1
hsa-miR-193b-3p	NM_014469	RBMXL2	AACTGGCCCTCAAAGTCCCGCT#GGTGGAGAGTGGGAGGGATTGGTG#.((((((((((..(.(((((((#))))).)).)..))))).))))).	1709	1733	1	-22.2	1	9.917492e-05	0.559	1.4591980909090907	1.05968	-9.16471	18	24	5	3UTR		0	0
hsa-miR-193b-3p	NM_014477	TP53TG5	AACTGGCCCTCAAAGTCCCGCT#AGCCATCGAGGGGCACAGAGCTCTCCGGGATTGGGGGTCAGG#..((((((((((..((((((..#.)))))))))))))))).	1826	1868	1	-27.7	1	0.0178951	0.397	-0.407743	-0.198386	-7.10297	16	18	16	3UTR		0	0
hsa-miR-193b-3p	NM_014484	MOCS3	AACTGGCCCTCAAAGTCCCGCT#AGTGGGACAGGGTGAGG#..((.(((((....((((((((#))))))))))))).)).	4813	4830	1	-24.1	0	0.0171877	0.544	-0.12753	0.27245036875000006	-17.3936	15	17	13	3UTR		0	0
hsa-miR-193b-3p	NM_014495	ANGPTL3	AACTGGCCCTCAAAGTCCCGCT#GCTGATTTTTTTAGGGCCAGA#..((((((((.((((((..((.#)).))))))...)))))))).	2807	2828	1	-21.4	1	0.00452406	0.574	-0.00751182	-0.165976	-7.78178	16	21	8	3UTR		0	0
hsa-miR-193b-3p	NM_014548	TMOD2	AACTGGCCCTCAAAGTCCCGCT#GGCGGGAAGTTGAGAACACTAGG#..((((..(((((..(((((((#)))))))..)))))....)))).	5460	5483	1	-21.7	0	0.00800903	0.529	-0.251841	-0.00852777	-10.4066	16	23	7	3UTR		0	0
hsa-miR-193b-3p	NM_014553	TFCP2L1	AACTGGCCCTCAAAGTCCCGCT#GCCACCTCCTTCCCATCGCCCCTTAGGGACAGGGCTTGAGGGCCAGTG#.((((((((((.((((((.(((#.)).).)))))))))))))))).	6879	6927	1	-30.4	1	4.752356e-08	0.324	-0.0455537	-0.0675088	-7.14013	19	23	16	3UTR		0	0
hsa-miR-193b-3p	NM_014565	OR1A1	AACTGGCCCTCAAAGTCCCGCT#AGCGGGTTGGGGGCAAGA#..((.((((((((...((((((#)))))))))))))).)).	4037	4055	1	-24.8	0	0.00890321	0.456	0	0	-10.9014	16	18	14	3UTR		0	0
hsa-miR-193b-3p	NM_014568	GALNT5	AACTGGCCCTCAAAGTCCCGCT#AGTATTAGTTTGGGACTGCAGAGGGGCAA#...((.(((((..(((((((..#.)))))))...))))).)).	6430	6459	1	-24.6	0	0.00104126	0.588	-0.0524484	0.32436408874999995	-13.0514	14	20	7	3UTR		0	0
hsa-miR-193b-3p	NM_014597	DNTTIP2	AACTGGCCCTCAAAGTCCCGCT#AGTTGGGCTCTGGGCTAGG#..(((((((....(((((.(((#))).)))))..))))))).	5366	5385	1	-21.7	1	0.000381016	0.574	0.428016	1.5167176437499998	-13.6602	15	19	7	3UTR		0	0
hsa-miR-193b-3p	NM_014598	SOCS7	AACTGGCCCTCAAAGTCCCGCT#GGTGGGAGGGGTCTGAGGGTGGGA#..((.(((((((...(((((((#)))))))......))))))).)).	7880	7904	1	-25.4	0	0.0105232	0.5	1.7986184285714282	2.6175055037499995	-11.9575	16	24	7	3UTR		0	0
hsa-miR-193b-3p	NM_014621	HOXD4	AACTGGCCCTCAAAGTCCCGCT#AGCGGGATGGGGATGGGAGGGGGGGCGGGA#..((.((((((...((((((((#))))))))............)))))).)).	1027	1057	1	-27.1	0	1.472332e-05	0.426	0.597521	1.53807	-14.5688	16	30	8	3UTR		0	0
hsa-miR-193b-3p	NM_014636	RALGPS1	AACTGGCCCTCAAAGTCCCGCT#AGCCTGAGACAGAGAGGGCCAGG#..(((((((((...((((.(((#)))..).)))...))))))))).	4366	4389	1	-24.3	1	0.000277697	0.412	-0.102688	-0.0228264	-10.4498	16	23	9	3UTR		0	0
hsa-miR-193b-3p	NM_014637	MTFR1	AACTGGCCCTCAAAGTCCCGCT#GCGAAAAGACTCCTGGTTCCCCTGTTGATTTGTGAGGGCCAAGTTT#(((((((((((((((((.....#.))))).))))))))).))).	1146	1192	1	-22.1	1	0.0026324	0.559	0.8004764736842107	1.58395	-3.93757	17	21	9	3UTR		0	0
hsa-miR-193b-3p	NM_014661	FAM53B	AACTGGCCCTCAAAGTCCCGCT#GGCCTGGGGTGGGGGCCAGG#..((((((((((...(((((((#)))..)))))))))))))).	2190	2210	1	-26.8	1	2.568348e-07	0.294	-0.653252	-0.574369	-7.83842	17	20	14	3UTR		0	0
hsa-miR-193b-3p	NM_014663	KDM4A	AACTGGCCCTCAAAGTCCCGCT#GCAATCATGCAGGGGCTGGGAGGGTTAGG#..(((((((((..((((((((.#.)).))))))..))))))))).	4168	4197	1	-30.6	1	0.00475826	0.485	1.4267387844444446	1.4210100477499998	-9.59293	17	22	9	3UTR		0	0
hsa-miR-193b-3p	NM_014669	NUP93	AACTGGCCCTCAAAGTCCCGCT#GCGGCCTGAGGGTCAGTG#.(((((((((((.....((((.#))))..))))))))))).	3867	3885	1	-25.8	1	1.229955e-05	0.441	0.551822	-0.211468	-6.90779	15	18	11	3UTR		0	0
hsa-miR-193b-3p	NM_014677	RIMS2	AACTGGCCCTCAAAGTCCCGCT#GGCGGGAATCAGAGCAGTCAGTC#.((((((.(((....(((((((#)))))))....)))..)))))).	4281	4304	1	-22.9	1	0.0129326	0.426	0.35685019999999995	0.6399516725000002	-12.3352	16	23	7	3UTR		0	0
hsa-miR-193b-3p	NM_014690	FAM131B	AACTGGCCCTCAAAGTCCCGCT#AGGGGGAGCATGAGGGCTG#....((((((((...((((.((#)).))))...)))))))).	2036	2055	1	-25.3	0	3.860165e-05	0.412	-0.191766	0.236423	-12.428	14	19	8	3UTR		1	0
hsa-miR-193b-3p	NM_014698	TMEM63A	AACTGGCCCTCAAAGTCCCGCT#GGCGGGATGGGGGTGTGGAAGAGCAGGTCCAGG#..((((((((((...(((((((#)))))))))))))...............)))).	3703	3736	1	-24.1	1	0.000236865	0.338	3.1907277119999993	2.06019	-7.83842	17	33	13	3UTR		0	1
hsa-miR-193b-3p	NM_014701	SECISBP2L	AACTGGCCCTCAAAGTCCCGCT#AGTGGGAAGAGTAAGGGTTGGTTC#((((((((((.....(((((((#)))))))......)))))))))).	5791	5815	1	-22.8	1	0.0398477	0.632	3.8808228000000007	2.8174507018749995	-12.9906	17	24	10	3UTR		0	0
hsa-miR-193b-3p	NM_014702	KIAA0408	AACTGGCCCTCAAAGTCCCGCT#CGGTTTAGATTTTGAGGGACCT#....((((((((((((((((..#)))....))))))))))).)).	6516	6538	1	-21.9	0	0.00358737	0.632	0.6374089666666667	1.17948	-9.54656	16	22	11	3UTR		0	0
hsa-miR-193b-3p	NM_014715	ARHGAP32	AACTGGCCCTCAAAGTCCCGCT#GGTGGGGTGGGGGGTGGC#..(((.((((((...(((((((#))))))))))))).))).	9305	9323	1	-21.9	0	0.0146672	0.441	0.1012556714285714	-0.287891	-9.73938	16	18	13	3UTR		0	0
hsa-miR-193b-3p	NM_014726	TBKBP1	AACTGGCCCTCAAAGTCCCGCT#GGCGGGGAAGGGGCCAA#...(((((((.....(((((((#)))))))..))))))).	3980	3997	1	-24.9	0	0.00013036	0.368	0.20297342857142858	0.556521	-15.5675	14	17	7	3UTR		0	0
hsa-miR-193b-3p	NM_014730	MLEC	AACTGGCCCTCAAAGTCCCGCT#TGGGGCAAGAGGGCTAGA#..(((((((((...((((((..#))))))..))))))))).	5224	5242	1	-26.1	1	0.00027947	0.603	0.7698186666666664	0.29665800749999993	-10.4498	15	18	9	3UTR		0	0
hsa-miR-193b-3p	NM_014733	ZFYVE16	AACTGGCCCTCAAAGTCCCGCT#AGCACTTTGGGAGGCCAA#...(((((((((((((...(((#))))))))))).))))).	8045	8063	1	-21.1	0	5.013198e-05	0.441	-0.124522	-0.0691848	-6.51454	16	18	11	3UTR		0	0
hsa-miR-193b-3p	NM_014733	ZFYVE16	AACTGGCCCTCAAAGTCCCGCT#AGAGTGACTGACGACGGGCCAGA#..(((((((((..((((.(.((#)).).))))...)).))))))).	5587	5610	1	-20.8	1	0.000691887	0.559	0.97141	0.967383	-9.59293	16	23	7	3UTR		0	0
hsa-miR-193b-3p	NM_014734	SUSD6	AACTGGCCCTCAAAGTCCCGCT#GACTTTCAAGGGCCAGA#..((((((((.((((((.....#))))))..)))))))).	4163	4180	1	-22.2	1	0.00159955	0.632	1.6646	0.7561231150250001	-7.78178	14	17	8	3UTR		0	0
hsa-miR-193b-3p	NM_014743	KIAA0232	AACTGGCCCTCAAAGTCCCGCT#GGTGGGTTGGGGCGGGTA#.(((.((((.(((...((((((#))))))))))))).))).	5677	5695	1	-23	0	0.000569748	0.456	1.5656811666666666	1.3471767049999999	-10.9802	16	18	13	3UTR		0	0
hsa-miR-193b-3p	NM_014744	TBC1D5	AACTGGCCCTCAAAGTCCCGCT#AGCCCTGGGGTTGCTAAGGAAGCTGCTTCAGGGAGTTGGGGGTTAGTTG#(((((((((((((..((((...#.)))).))))))))))))).	7116	7165	1	-26.3	1	0.0248772	0.456	0.06488007692307692	-0.0462276	-5.52986	17	20	13	3UTR		0	0
hsa-miR-193b-3p	NM_014747	RIMS3	AACTGGCCCTCAAAGTCCCGCT#AGGGGACTGAGGGCTTAGA#..(((((((((..((((((.((#))))))))))))))).)).	2090	2109	1	-24	1	0.000166688	0.441	1.00869	0.7485522849999999	-9.59293	17	19	15	3UTR		0	0
hsa-miR-193b-3p	NM_014749	KIAA0586	AACTGGCCCTCAAAGTCCCGCT#GCGGGTGGCTCACACCTGTAATCCCAGCACTTTGGGAGGCTGAGG#..(((((((((((((((((((.#))))).......................)))))))).)))).)).	7946	7991	1	-24.2	1	0.000448185	0.441	0.07641234090909085	0.013466662499999983	-4.957	19	45	8	3UTR		0	0
hsa-miR-193b-3p	NM_014762	DHCR24	AACTGGCCCTCAAAGTCCCGCT#GGCACACTGCCAGTGTCTTAGCAGGGTCTTGTGAGGGCTGGG#..(((((((((((((.((((((#.))).))).))).)))))))))).	3336	3378	1	-29.1	1	0.00154518	0.426	4.60278	3.6420692487500004	-5.19005	19	24	10	3UTR		0	0
hsa-miR-193b-3p	NM_014765	TOMM20	AACTGGCCCTCAAAGTCCCGCT#CGGGTATCTTGAGGGTTTGTG#.((.(((((((((.((((((..#)))).)).))))))))).)).	2073	2094	1	-22.2	0	0.000168121	0.588	-0.00116542	0.17945646750000005	-7.68219	17	21	9	3UTR		0	0
hsa-miR-193b-3p	NM_014770	AGAP2	AACTGGCCCTCAAAGTCCCGCT#CGGGACTTGGGGCCAA#...(((((((..((((((((..#))))))))))))))).	3062	3078	1	-27.1	0	1.971484e-05	0.426	1.4267945000000002	2.4412364999999996	-12.6861	15	16	15	3UTR		0	0
hsa-miR-193b-3p	NM_014786	ARHGEF17	AACTGGCCCTCAAAGTCCCGCT#AGCTGGGTCTGGACCCCACGGGGCTGGGGAGGGCCATGTG#.((((((((((..(((((((..#.)))))))...)))))))).)).	6842	6882	1	-31.4	1	0.00011342	0.368	0.7899451818181817	1.7079010512500004	-8.42926	17	23	8	3UTR		0	0
hsa-miR-193b-3p	NM_014790	JAKMIP2	AACTGGCCCTCAAAGTCCCGCT#GGGAACATGGGCCAGA#..(((((((......((((...#))))....))))))).	3758	3774	1	-22.2	1	3.107244e-05	0.588	0.31603242857142855	-0.125276	-15.2525	11	16	7	3UTR		0	0
hsa-miR-193b-3p	NM_014796	TESPA1	AACTGGCCCTCAAAGTCCCGCT#AGAGGGACTTGAGGGA#......(((((.(((((((.((#)).)))))))))))).	2635	2651	1	-22.5	0	0.0304883	0.691	-0.0527735	0.2910404025000001	-18.9134	14	16	12	3UTR		0	0
hsa-miR-193b-3p	NM_014798	PLEKHM1	AACTGGCCCTCAAAGTCCCGCT#GGGGCCTTGGGGCTGGG#..(((((((.(((.(((((...#))))).)))))))))).	4454	4471	1	-25	1	5.479665e-05	0.426	3.163803142857143	1.8317496187500004	-7.05635	15	17	10	3UTR		0	0
hsa-miR-193b-3p	NM_014809	KIAA0319	AACTGGCCCTCAAAGTCCCGCT#AGTGGGTGTTTGTAGGGCTCACAGG#..((((((((((((..((((((#))))))..)))).)))))...))).	6248	6273	1	-24.5	1	3.571208e-05	0.529	-0.125691	0.46646510625000004	-5.9255	18	25	6	3UTR		0	0
hsa-miR-193b-3p	NM_014812	CEP170	AACTGGCCCTCAAAGTCCCGCT#AGGGGACTTGGAGAACCAGTA#.(((((..(((.(((((((.((#))))))))).)))..))))).	6022	6043	1	-23.8	0	0.000273677	0.632	1.534568714285714	4.02847	-10.9974	17	21	9	3UTR		0	0
hsa-miR-193b-3p	NM_014817	TRIL	AACTGGCCCTCAAAGTCCCGCT#GGTGGGGACAGAGGGCCAA#...((((((((....(((((((#)))))))...)))))))).	2829	2848	1	-27.3	0	2.863333e-05	0.382	0.6133173999999999	1.0523167525000001	-12.7428	15	19	8	3UTR		0	0
hsa-miR-193b-3p	NM_014823	WNK1	AACTGGCCCTCAAAGTCCCGCT#AGGGGGTGGGGGGCTAGTTT#(((((((((((.....(((.((#)).)))..))))))))))).	8726	8746	1	-25.3	1	0.0012306	0.544	0.20208820909090905	0.6445925312499998	-10.3988	16	20	11	3UTR	MIRT041474	0	0
hsa-miR-193b-3p	NM_014830	ZBTB39	AACTGGCCCTCAAAGTCCCGCT#GGGACTTGTACAGTGGCCAGTTT#((((((((((..(((((((...#)))))))....)).)))))))).	4325	4348	1	-26.7	1	0.0283515	0.544	1.8883673818181819	1.40021	-10.1092	17	23	8	3UTR		0	0
hsa-miR-193b-3p	NM_014830	ZBTB39	AACTGGCCCTCAAAGTCCCGCT#GGTGGGATAAGGGTCAGG#..((((((((....((((((((#)))))))).)))))))).	5555	5573	1	-25.1	1	0.00476616	0.456	0.8005120000000001	1.3358802722425	-13.2745	16	18	8	3UTR		0	0
hsa-miR-193b-3p	NM_014863	CHST15	AACTGGCCCTCAAAGTCCCGCT#GGTGGGACTTCAGGCCAA#...(((((....((((((((((#))))))))))..))))).	2671	2689	1	-24.3	0	3.39227e-07	0.412	3.7583037999999993	2.58065	-14.985	15	18	10	3UTR		0	0
hsa-miR-193b-3p	NM_014870	ZBTB40	AACTGGCCCTCAAAGTCCCGCT#GTGGGAATACTGGGGTCAGTTA#((((((((((.....((((((.#)))))).....)))))))))).	7003	7025	1	-27.1	1	0.0012802	0.5	-0.0105114	0.09819582249999999	-12.9906	16	22	10	3UTR		0	1
hsa-miR-193b-3p	NM_014872	ZBTB5	AACTGGCCCTCAAAGTCCCGCT#GATGTTGAGGGCCAGTC#.((((((((((((.(((.....#))).)))))))))))).	3163	3180	1	-26	1	9.266308e-05	0.456	2.5735062083333333	3.1373908812499995	-4.65016	15	17	12	3UTR	MIRT016435	1	1
hsa-miR-193b-3p	NM_014887	N4BP2L2	AACTGGCCCTCAAAGTCCCGCT#GGTGGGATTACAGGCATGAGCCACCACACCAGGCCTAGTTG#((((((((((((.(((((((((#))))))))).......))))...........)))).)))).	4845	4886	1	-21	1	0.000671743	0.574	-0.0655295	-0.0440198	-5.22671	21	41	9	3UTR		0	0
hsa-miR-193b-3p	NM_014909	VASH1	AACTGGCCCTCAAAGTCCCGCT#GGCAGAGAGGCAGGGACTTTGGGGCCTTAGTC#.((((((((.((((((((((((#.))).))))))))))))))..))).	5288	5320	1	-31	1	0.000313163	0.441	1.089156876923077	1.29148	-5.03583	20	25	14	3UTR		0	0
hsa-miR-193b-3p	NM_014917	NTNG1	AACTGGCCCTCAAAGTCCCGCT#AGGGGTAGGAAGGAGATAGACAAGGGCTACCACGAGGCTGGGGGCCAGTA#.((((((((((..((((.((..#.)).)))))))))))))).	5384	5434	1	-25.7	1	2.254562e-05	0.5	0.11554226000000001	-0.119916	-8.42926	16	19	14	3UTR		0	0
hsa-miR-193b-3p	NM_014930	ZNF510	AACTGGCCCTCAAAGTCCCGCT#GTGGGTTGAAACTTCTGGCAAAAGGGGGCAGCCCTTGGGAGCTGGGGGCCAGG#..((((((((((...(((((((#.)))....))))..)))))))))).	4251	4304	1	-28.1	1	0.000242925	0.368	-0.595907	0.033986406250000004	-7.83842	17	25	10	3UTR		0	1
hsa-miR-193b-3p	NM_014930	ZNF510	AACTGGCCCTCAAAGTCCCGCT#GGTGAGGTACTTTGGGCCAGTA#.((((((((..(((((((((((#)))).)).))))))))))))).	4031	4053	1	-25.8	1	0.000106812	0.662	-1.00759	-0.0644791	-7.86061	19	22	13	3UTR		0	1
hsa-miR-193b-3p	NM_014952	BAHD1	AACTGGCCCTCAAAGTCCCGCT#AGCCTCCCCCTTGCCCTCAAAGGGGGAGTGGGGGCCAGC#..((((((((((...((((.((#.)).)))).)))))))))).	3049	3088	1	-29.6	1	5.144929e-10	0.338	0.34933103700000007	1.5103306277500002	-7.83842	16	20	10	3UTR		0	0
hsa-miR-193b-3p	NM_014979	SV2C	AACTGGCCCTCAAAGTCCCGCT#GGTGGGGCTCTTTGGGGCAAGA#..((.((((.((((((((((((#)))))))))..))))))).)).	2963	2985	1	-24.8	0	0.000226669	0.471	1.18979	0.541593	-10.3185	18	22	9	3UTR		0	0
hsa-miR-193b-3p	NM_014980	STXBP5L	AACTGGCCCTCAAAGTCCCGCT#AGCCCCAGACTTTAGGGCCC#....((((((.((((((..(((#)))....)))))))))))).	7216	7236	1	-19.9	0	0.00081898	0.544	-0.0148196	-0.0543138	-12.3713	15	20	12	3UTR		0	0
hsa-miR-193b-3p	NM_014994	MAPKBP1	AACTGGCCCTCAAAGTCCCGCT#GCGGGGCTGCTTGGAGTGGAAAGCAGGGAGCAGTG#.((((.(((((((((((((((.#))))))))..)))...........))))..)))).	4840	4875	1	-23.9	0	0.00357123	0.368	0.7212334214285713	0.44427585249999996	-5.69428	19	35	8	3UTR		0	0
hsa-miR-193b-3p	NM_015021	ZNF292	AACTGGCCCTCAAAGTCCCGCT#TGGGACTTGAGGAACAGA#..(((..((((.((((((((..#))))))))))))..))).	8379	8397	1	-23.7	0	3.891181e-05	0.691	4.093601249999999	1.805836277500001	-11.7484	15	18	12	3UTR		0	0
hsa-miR-193b-3p	NM_015026	MON2	AACTGGCCCTCAAAGTCCCGCT#GGTGGGAGTATCACTTGAGGCCAGG#..((((.(((((((.(((((((#))))))).).....)))))))))).	10607	10632	1	-25.6	0	0.00154744	0.5	-0.0169134	-0.0512632	-7.23614	18	25	10	3UTR		0	0
hsa-miR-193b-3p	NM_015035	ZHX3	AACTGGCCCTCAAAGTCCCGCT#GGTGGGGCAGGGCTAA#...(((((((....((((((((#))))))))))))))).	7759	7775	1	-23.6	0	1.056821e-07	0.368	4.220640375000001	2.9629740800000004	-14.8321	15	16	15	3UTR		1	0
hsa-miR-193b-3p	NM_015036	ENDOD1	AACTGGCCCTCAAAGTCCCGCT#GCTGGGCTTTGAGGTAGAGGTTG#((((...(((((((((((.((.#)).)))))))))))....)))).	4066	4089	1	-24.1	0	5.010417e-06	0.515	0.30072594545454545	-0.113638	-11.5013	17	23	11	3UTR	MIRT016599	0	0
hsa-miR-193b-3p	NM_015039	NMNAT2	AACTGGCCCTCAAAGTCCCGCT#GGGACCTTTGGAGGCCAT#...(((((.((((((((((...#))))).))))).))))).	2065	2083	1	-23.7	0	0.000367876	0.471	0.09424063636363633	0.465576	-7.57093	15	18	5	3UTR		0	0
hsa-miR-193b-3p	NM_015039	NMNAT2	AACTGGCCCTCAAAGTCCCGCT#CGGGTTGGGGGTGGGTG#.(((.((((((((...((((..#)))))))))))).))).	1240	1257	1	-22.9	0	0.0259094	0.368	-0.171712	-0.055679	-9.7377	15	17	12	3UTR		0	0
hsa-miR-193b-3p	NM_015042	ZNF609	AACTGGCCCTCAAAGTCCCGCT#GGCAGGACTTAGAGTTGCGAGTTAAGACTGCAGAGGGCTAGA#..(((((((((.((((((.(((#))).))))))......................))))))))).	7624	7666	1	-25	1	0.00219866	0.544	1.8689918888888886	0.38956234874999995	-8.3038	18	42	9	3UTR		0	0
hsa-miR-193b-3p	NM_015051	ERP44	AACTGGCCCTCAAAGTCCCGCT#GATCTGTGAGGGTCAGC#..((((((((((.((((.....#)).)).)))))))))).	2940	2957	1	-20.2	1	0.000140947	0.559	2.0951784000000004	1.9390470362499996	-6.24613	14	17	10	3UTR		0	0
hsa-miR-193b-3p	NM_015055	SWAP70	AACTGGCCCTCAAAGTCCCGCT#GCTTTGGGGGCCGGG#..((((((((((((((......#)))))))))))))).	1938	1953	1	-26	1	1.141122e-05	0.456	0.518261142857143	0.1312081725000001	-4.957	14	15	14	3UTR		0	0
hsa-miR-193b-3p	NM_015074	KIF1B	AACTGGCCCTCAAAGTCCCGCT#AGCGCTCAGGCCAGGACTGTGCAGGGCCAGC#..((((((((((.(((((.(((#.)))..))))).)).)))))))).	8803	8834	1	-28.4	1	0.000170136	0.338	0.2391561818181818	0.425088	-6.24613	18	24	8	3UTR	MIRT016600	0	0
hsa-miR-193b-3p	NM_015085	RAP1GAP2	AACTGGCCCTCAAAGTCCCGCT#CGGGCCTGAGGGCCAGG#..((((((((((..(.((((..#))))).)))))))))).	3225	3242	1	-27.6	1	7.945595e-08	0.368	-0.675738	-0.314074	-7.33602	15	17	10	3UTR		0	0
hsa-miR-193b-3p	NM_015085	RAP1GAP2	AACTGGCCCTCAAAGTCCCGCT#GGCCCTGGGTTTTGGGGAAGCCAGTTA#(((((((((((((((.((((((#)))...)))))))))))..))))))).	5329	5356	1	-25.8	1	4.958904e-05	0.397	0.10057111176470586	-0.243655	-4.17062	21	27	11	3UTR		0	0
hsa-miR-193b-3p	NM_015111	N4BP3	AACTGGCCCTCAAAGTCCCGCT#AGTGGGGCCGTGGGCTGGG#..(((((((.(...((((((((#)))))))).).))))))).	2045	2064	1	-25.3	1	5.066918e-05	0.324	0.40300868749999996	0.12002341875000004	-11.6923	16	19	8	3UTR		1	1
hsa-miR-193b-3p	NM_015155	LARP4B	AACTGGCCCTCAAAGTCCCGCT#GCAGATGAATGAGGGCCAGTG#.(((((((((((..(((..((.#)).)))...))))))))))).	2958	2979	1	-26	1	0.00185129	0.412	-0.111394	0.4835140712500001	-5.9393	16	21	11	3UTR		0	0
hsa-miR-193b-3p	NM_015172	PRRC2C	AACTGGCCCTCAAAGTCCCGCT#AGGGGATTGGGAGGGGGGCGGGA#..((.((((((..((((((.((#)))))))).....)))))).)).	8734	8757	1	-23.4	0	0.0720148	0.515	0.5996063333333335	2.64171	-13.712	16	23	8	3UTR		0	0
hsa-miR-193b-3p	NM_015176	FBXO28	AACTGGCCCTCAAAGTCCCGCT#CTTTGGGGGCCATGTC#.((((((((((((((.......#)))))))))))).)).	1759	1775	1	-22.2	1	9.792491e-05	0.574	2.1614932733333334	2.2892632524999996	-4.02637	14	16	12	3UTR		0	0
hsa-miR-193b-3p	NM_015264	KIAA0930	AACTGGCCCTCAAAGTCCCGCT#GGTGGGACCCCGTCTTCTGGGGGCGGGG#..((.(((((((..((((((((#)))))))).........))))))).)).	2112	2140	1	-27.1	0	1.487443e-09	0.412	-0.249078	-0.0150411	-11.222	17	28	8	3UTR		0	0
hsa-miR-193b-3p	NM_015266	SLC9A8	AACTGGCCCTCAAAGTCCCGCT#AGGGGGATGGGCCAGGGCCAGG#..((((((((....(((((.((#)).))))).....)))))))).	4600	4622	1	-27.9	1	5.219492e-06	0.382	0.020708124999999997	0.010454349999999994	-13.2745	15	22	8	3UTR		0	0
hsa-miR-193b-3p	NM_015278	SASH1	AACTGGCCCTCAAAGTCCCGCT#GCAGGATGCCCGAGGGCCAGA#..(((((((((...((((.((.#)).))))....))))))))).	4364	4385	1	-27.8	1	0.000121272	0.471	0.2274924555555556	0.6532595074999997	-10.4498	15	21	9	3UTR		0	0
hsa-miR-193b-3p	NM_015299	KHNYN	AACTGGCCCTCAAAGTCCCGCT#GTGGGGCTTTGGTGATGGCTTTAGCCAGC#..(((((((((((((((((((.#))))))))))))....)).....))))).	6644	6673	1	-26.3	1	6.771452e-05	0.412	2.7969770000000005	3.32143	-4.957	19	29	12	3UTR		1	0
hsa-miR-193b-3p	NM_015303	VPS8	AACTGGCCCTCAAAGTCCCGCT#AGCAGACACTGTGGGGGCCAGG#..((((((((((.(((..((((#))).)..))).)))))))))).	4899	4921	1	-24.9	1	0.000479287	0.485	-0.243358	-0.553408	-6.24613	17	22	10	3UTR		0	0
hsa-miR-193b-3p	NM_015324	RRP8	AACTGGCCCTCAAAGTCCCGCT#GGTGGGATGTTGAGGTTGGTA#.(((((.((((((.((((((((#)))))))).))))))))))).	3390	3411	1	-24.4	0	0.0733431	0.588	0.59862	0.362197	-6.19385	19	21	11	3UTR		0	0
hsa-miR-193b-3p	NM_015324	RRP8	AACTGGCCCTCAAAGTCCCGCT#GTGGGACTTTGGGATGTATATAGCTGAGAGCACAGA#..(((((((((((((((((((.#)))))))))))))..............).)).))).	2138	2174	1	-24.2	1	0.0163829	0.574	-0.00739351	-0.0341967	-4.957	19	36	13	3UTR		0	0
hsa-miR-193b-3p	NM_015326	SRGAP2	AACTGGCCCTCAAAGTCCCGCT#GGTGTGGACTCTGAAGGGTCAGTC#.(((((((((((.(((((((((#)))).))))).))).)))))))).	6429	6453	1	-29	1	1.855153e-05	0.426	0.991913	0.30039743262499996	-5.08246	20	24	8	3UTR		0	0
hsa-miR-193b-3p	NM_015329	MAU2	AACTGGCCCTCAAAGTCCCGCT#TGGGAATGTGCGGGGCCAGTC#.(((((((((((...(((((..#)))))...)).))))))))).	1994	2015	1	-26.3	1	4.294161e-05	0.353	-0.298447	-0.169463	-6.67474	16	21	9	3UTR		0	0
hsa-miR-193b-3p	NM_015332	NUDCD3	AACTGGCCCTCAAAGTCCCGCT#AGTGGGACTGCTGAGCTCCAGC#..((((..((((.(((((((((#)))))))))..))))..)))).	6456	6478	1	-26.3	0	1.549207e-05	0.441	0.10591413333333333	-0.147184	-10.1035	17	22	9	3UTR		0	0
hsa-miR-193b-3p	NM_015336	ZDHHC17	AACTGGCCCTCAAAGTCCCGCT#GGTGGGAGATGTGGGGGAATGGTG#.((((.((((((...(((((((#)))))))....))))))..)))).	3334	3358	1	-23.1	0	0.081778	0.471	0.955804	2.6396238375000003	-8.5757	17	24	7	3UTR		0	0
hsa-miR-193b-3p	NM_015340	LARS2	AACTGGCCCTCAAAGTCCCGCT#GGGAAGACAGGGGCCAGA#..((((((((.....((((...#)))).....)))))))).	4676	4694	1	-24.2	1	0.0403655	0.471	0.16292955712499999	-0.37035	-14.01	12	18	8	3UTR		0	0
hsa-miR-193b-3p	NM_015360	MTREX	AACTGGCCCTCAAAGTCCCGCT#GGTGGGGCACTGTTTTGGTGGAAGGC#..((..((.(((((((((((((#)))))))).....))))).))..)).	3353	3379	1	-18.8	0	0.00101222	0.618	1.8985801555555557	1.8160647724999999	-12.0334	17	26	8	3UTR		0	0
hsa-miR-193b-3p	NM_015374	SUN2	AACTGGCCCTCAAAGTCCCGCT#GTGGGGCAGTTGGTGGGGGCTGGG#..((((((((((..(((((((.#)))))))......)))))))))).	3473	3497	1	-28.2	1	0.000487829	0.412	1.8712830999999999	1.8111927375000008	-7.10297	17	24	10	3UTR		0	0
hsa-miR-193b-3p	NM_015419	MXRA5	AACTGGCCCTCAAAGTCCCGCT#AGCGGGGTTTGTAAGGGAAGCCAGG#..((((((((((((.(((((((#)))))))))))..)))...))))).	8693	8718	1	-24.3	1	0.000202109	0.529	0.362822994117647	1.32682	-5.69245	19	25	11	3UTR		0	0
hsa-miR-193b-3p	NM_015421	TMEM186	AACTGGCCCTCAAAGTCCCGCT#GGTACTTGGAGACTTTGCCTGGGCCC#....(((((.((((((((((..#.))).)))))))...))))).	757	783	1	-22.7	0	9.082047e-05	0.5	-0.161561	0.4992313562499998	-10.7891	15	21	7	3UTR		0	0
hsa-miR-193b-3p	NM_015459	ATL3	AACTGGCCCTCAAAGTCCCGCT#GGTGGGGTTTTGCCATGTTGGCCAGG#..((((((..((((((((((((#)))))))))))).......)))))).	4774	4800	1	-23.1	1	2.61342e-05	0.515	0.46138477499999997	0.05807766499999996	-7.2559	18	26	12	3UTR		0	0
hsa-miR-193b-3p	NM_015471	NSL1	AACTGGCCCTCAAAGTCCCGCT#GGTGGACAGGGGCATTTGCTGTGGAGACCAGAGGGCCAGA#..(((((((((...(((((((.#.)))).)))..))))))))).	12703	12743	1	-28.9	1	0.00603422	0.412	2.495918222222222	2.3558572712500006	-10.4498	16	21	9	3UTR		0	0
hsa-miR-193b-3p	NM_015508	TIPARP	AACTGGCCCTCAAAGTCCCGCT#GGTGGGACTGGGTGGGGAACAGC#..(((..(((((.(((((((((#)))))))))...)))))..))).	2288	2311	1	-26.1	0	0.00374071	0.515	1.6189207777777779	1.2993020112499998	-9.69078	17	23	9	3UTR		0	0
hsa-miR-193b-3p	NM_015513	CRELD1	AACTGGCCCTCAAAGTCCCGCT#TGGGAAATTGAGGGCTT#....(((((((((..(((((..#)))))..))))))))).	2162	2179	1	-23.7	0	0.00010917	0.574	0.19211737777777776	-0.328104	-11.1389	14	17	9	3UTR		0	0
hsa-miR-193b-3p	NM_015514	NGDN	AACTGGCCCTCAAAGTCCCGCT#GCTGGGACTTAGGTGATCAGG#..((((((((..(((((((((.#)).)))))))))).).)))).	952	973	1	-20.4	1	0.0106836	0.529	0.0025824679999999984	1.1759955845000003	-11.1286	17	21	10	3UTR		0	0
hsa-miR-193b-3p	NM_015528	RNF167	AACTGGCCCTCAAAGTCCCGCT#AGCTTCTCCCTTACCCACACCTATCCTTTTGAGGGGCTTTGGGGTGGAGCTGGG#..(((((((((((((((((.(.#.).))))))))))))....))))).	1660	1714	1	-26	1	1.232047e-05	0.426	0.10072459047619045	-0.0930721	-4.957	18	25	12	3UTR		0	0
hsa-miR-193b-3p	NM_015565	LTN1	AACTGGCCCTCAAAGTCCCGCT#AGCCTTGAGCCTCTGAGGGTCAGTA#.(((((((((((.((....(((#.))))).))))))))))).	6801	6826	1	-22	1	0.000191216	0.632	4.674460181818183	3.82923	-5.3155	16	19	11	3UTR		0	0
hsa-miR-193b-3p	NM_015568	PPP1R16B	AACTGGCCCTCAAAGTCCCGCT#GGGAGAGAGGCCAGTTA#(((((((((((....((((...#))))))).)))))))).	2909	2926	1	-24	1	0.0177534	0.603	-0.111268	-0.0529846	-10.1658	15	17	8	3UTR		0	0
hsa-miR-193b-3p	NM_015595	ARHGEF26	AACTGGCCCTCAAAGTCCCGCT#CGGGCTGGTTGGTTCTGGGCTAGTTT#(((((((((((((((.((((..#))))))..))))....))))))))).	2843	2869	1	-21.5	1	2.690741e-05	0.574	0.6541943333333334	0.470846	-4.17062	19	26	9	3UTR		0	0
hsa-miR-193b-3p	NM_015675	GADD45B	AACTGGCCCTCAAAGTCCCGCT#TGGGACTTGGGAGCTGGG#..(((((.(((.((((((((..#))))))))))).))))).	1188	1206	1	-22	0	4.913475e-05	0.441	0.18560166250000001	-0.019897	-10.6174	16	18	11	3UTR		0	0
hsa-miR-193b-3p	NM_015694	ZNF777	AACTGGCCCTCAAAGTCCCGCT#AGCGGGCGGGGGCGGGG#..((.((((((...(.((((((#))))))))))))).)).	2834	2851	1	-25	0	7.341525e-12	0.176	1.04819	0.8696647889999999	-14.8019	15	17	13	3UTR		0	0
hsa-miR-193b-3p	NM_015713	RRM2B	AACTGGCCCTCAAAGTCCCGCT#GGCATTATGTGGTTAAGAGCATGGGGCGAGGGGTCAGA#..((((((((....((((((((#.)))..)))))..)))))))).	1362	1400	1	-24.2	1	0.000417117	0.485	1.08258	0.337547	-13.2745	16	22	8	3UTR		0	0
hsa-miR-193b-3p	NM_015865	SLC14A1	AACTGGCCCTCAAAGTCCCGCT#AGCACTTTGGGGAGCCCAGG#..((((((((((((((...(((#)))))))))))).))).)).	2486	2506	1	-20.5	1	1.547123e-05	0.397	-0.224584	-0.104818	-4.957	17	20	12	3UTR		0	0
hsa-miR-193b-3p	NM_015878	AZIN1	AACTGGCCCTCAAAGTCCCGCT#AGTTGGGATGGGGGTTGGG#..((((((((((...(((((((#))).)))))))))))))).	3185	3204	1	-21.1	1	0.0236812	0.559	3.3217696699999997	4.06872	-7.83842	17	19	14	3UTR		0	0
hsa-miR-193b-3p	NM_015878	AZIN1	AACTGGCCCTCAAAGTCCCGCT#GGCTAAAACTTTGGGAAAGGGGCTAGC#..((((((((.....(((((..#.)))))..)))))))).	2695	2722	1	-20.4	1	7.502763e-05	0.618	2.86329	3.688936827500001	-14.01	13	17	8	3UTR		0	0
hsa-miR-193b-3p	NM_015884	MBTPS2	AACTGGCCCTCAAAGTCCCGCT#GGGAGTCAGCAGGCCAGTG#.(((((((..(..(.((((...#)))).)..)..))))))).	2904	2923	1	-21.7	1	0.00146661	0.485	0.5162079857142857	0.18542141075000002	-11.4636	13	19	7	3UTR		0	0
hsa-miR-193b-3p	NM_015894	STMN3	AACTGGCCCTCAAAGTCCCGCT#AGGGGGATTTTGTGGGACCGC#...((((((.(((((((((.((#)).))))))))).))).))).	1518	1539	1	-25.8	0	5.070658e-08	0.368	0.6080170444444444	1.4005481300000002	-7.75705	17	21	9	3UTR		0	0
hsa-miR-193b-3p	NM_015944	AMDHD2	AACTGGCCCTCAAAGTCCCGCT#AGCGGGATGCCATCAGGGCCGGG#..((((((((....((((((((#))))))))......)))))))).	1440	1463	1	-30.1	1	7.879921e-06	0.309	1.1316229624999998	-0.000939185	-13.2745	16	23	8	3UTR		0	0
hsa-miR-193b-3p	NM_015957	APIP	AACTGGCCCTCAAAGTCCCGCT#TGAGGGCACAGTG#.(((((((((((..........#))))))).)))).	1011	1024	1	-19.3	1	0.000728488	0.75	5.31403	4.93288	-6.90779	11	13	7	3UTR		0	0
hsa-miR-193b-3p	NM_016022	APH1A	AACTGGCCCTCAAAGTCCCGCT#GTGGGAGGGGCGGGG#..((.(((((.....((((((.#))))))))))).)).	1954	1969	1	-22.2	0	0.00635382	0.603	1.0043955666666669	0.8778166225000001	-18.129	13	15	11	3UTR		0	0
hsa-miR-193b-3p	NM_016033	RMDN1	AACTGGCCCTCAAAGTCCCGCT#AGCAGCTGAAGGGCCAGG#..((((((((...(((...(((#))).)))..)))))))).	2854	2872	1	-20.8	1	0.00157382	0.5	-0.190594	0.09451659349999995	-12.4177	14	18	8	3UTR		0	0
hsa-miR-193b-3p	NM_016045	PRELID3B	AACTGGCCCTCAAAGTCCCGCT#GATTTTGAGGGTTCCAGTA#.((((((((((((((((.....#)))))))))))..))))).	856	875	1	-23.5	1	0.000386539	0.676	0.6497531611111111	0.11744892750000008	-3.79332	16	19	11	3UTR		0	0
hsa-miR-193b-3p	NM_016056	TMBIM4	AACTGGCCCTCAAAGTCCCGCT#AGGGGGATTTGGCAGGGTCAT#...((((((((.(((((((.((#)).))))))).).))))))).	2691	2712	1	-24.1	0	0.000363422	0.471	2.859696412222222	2.78927	-9.86134	17	21	7	3UTR		0	0
hsa-miR-193b-3p	NM_016070	MRPS23	AACTGGCCCTCAAAGTCCCGCT#AGCTCTCCAAGGGTAGTGGGGAGAGATCTGGGATGTTGGGGGCTGGC#..(((((((((((.((((((..#.)))))).))))))))))).	5222	5269	1	-27.6	1	0.00238168	0.515	2.2721155818181824	2.8242964100000005	-5.81384	17	20	11	3UTR		0	0
hsa-miR-193b-3p	NM_016075	VPS36	AACTGGCCCTCAAAGTCCCGCT#AGTGGGTAAGGTGGAGGGCCAC#...((((((((.....((((((#)))))).......)))))))).	2440	2462	1	-25.6	0	8.673476e-06	0.382	0.175015	0.12398867000000001	-12.9758	14	22	8	3UTR		0	0
hsa-miR-193b-3p	NM_016079	CHMP3	AACTGGCCCTCAAAGTCCCGCT#GTGGGACATGGGCCT#....(((((.....(((((((.#)))))))..))))).	1520	1535	1	-23.4	0	7.034849e-05	0.485	0.41881415714285714	-0.0419825	-19.1066	12	15	7	3UTR		0	0
hsa-miR-193b-3p	NM_016093	RPL26L1	AACTGGCCCTCAAAGTCCCGCT#GGTTTAACCGGAGATTTTGAGGCTAGG#..((((.(((((((((((((..#.))).)))))))))))))).	514	541	1	-24.3	0	0.0136925	0.559	0.8586390142857142	1.8732015775000002	-6.50069	17	20	14	3UTR		0	0
hsa-miR-193b-3p	NM_016094	COMMD2	AACTGGCCCTCAAAGTCCCGCT#AGGGTGGAAATGAGGGTTCAGTC#.(((((((((((...((((.((#)).).)))..))))))).)))).	2007	2030	1	-20.9	1	0.000309004	0.588	0.18776039333333336	0.22270651474999997	-6.67474	17	23	7	3UTR		0	0
hsa-miR-193b-3p	NM_016097	IER3IP1	AACTGGCCCTCAAAGTCCCGCT#AGGGGGACAACAGACACTGGGGGCTAT#...(((((((((..(((((.((#)).))))).........))))))))).	2926	2953	1	-23.7	0	0.00150508	0.456	0.09980261111111112	0.6937363925000001	-8.66051	16	27	9	3UTR		0	0
hsa-miR-193b-3p	NM_016115	ASB3	AACTGGCCCTCAAAGTCCCGCT#GTGAGATAGGTTAGGTTTTGGGGGGCCAGTA#.((((((((((((((.((.(((#.)))..))))))))))).))))).	1815	1846	1	-23.8	1	0.00104686	0.618	2.6799988126666667	2.4042947346249997	-4.02637	19	24	11	3UTR	MIRT728291	0	0
hsa-miR-193b-3p	NM_016120	RLIM	AACTGGCCCTCAAAGTCCCGCT#GGCTAGTTTTTATATTTTTAGTAGAGATGGGGACTTCACCGTGTTGGCCAGG#..((((((..(((((((((...#.))))))).....))..)))))).	5213	5265	1	-24.4	1	0.00104773	0.515	-0.336312	0.12352281187500003	-7.2559	15	24	7	3UTR		0	0
hsa-miR-193b-3p	NM_016123	IRAK4	AACTGGCCCTCAAAGTCCCGCT#GGTGGGGCCTGATGGGAAGTG#.(((..((((((..((((((((#)))))))).))).))).))).	3927	3948	1	-21.4	0	0.00743502	0.412	0.08108662500000002	0.09148253750000002	-11.9593	17	21	8	3UTR		0	0
hsa-miR-193b-3p	NM_016179	TRPC4	AACTGGCCCTCAAAGTCCCGCT#GGGTCTTTAGAGAGGGTTAC#...((((((((((((.(((...#))).))))...)))))))).	3544	3564	1	-20.3	0	0.00367552	0.618	0.5833940999999999	0.063553	-6.74759	15	20	8	3UTR		0	0
hsa-miR-193b-3p	NM_016196	RBM19	AACTGGCCCTCAAAGTCCCGCT#GCTCCCCCTGTCCCCACCCCAGGAGAGTAAGGGGACGAGGGCCAGC#..(((((((((...(((((.((#.)))))))))))))))).	3308	3354	1	-28.4	1	7.187234e-07	0.382	1.7892341666666667	0.536492	-10.4498	16	18	16	3UTR		0	0
hsa-miR-193b-3p	NM_016200	LSM8	AACTGGCCCTCAAAGTCCCGCT#GGGTCTTGGGCTAGTC#.((((((((...(((.(((...#))).))))))))))).	6090	6106	1	-21.7	1	0.000220467	0.574	-0.077963	0.266125	-11.4405	14	16	11	3UTR		0	0
hsa-miR-193b-3p	NM_016206	VGLL3	AACTGGCCCTCAAAGTCCCGCT#AGACGGGATTTCACCATGTTGGCCAGG#..((((((..((((((((((((#)).)))))))).....))..)))))).	8953	8980	1	-24.1	1	0.00132526	0.5	0.7226623000000001	0.8729460637499997	-7.2559	18	27	8	3UTR		0	0
hsa-miR-193b-3p	NM_016208	VPS28	AACTGGCCCTCAAAGTCCCGCT#ACTTTGGGGGCCGGG#..((((((((((((((......#)))))))))))))).	899	914	1	-25.7	1	0.000377061	0.426	-0.506731	-0.0977621	-4.957	14	15	14	3UTR		0	0
hsa-miR-193b-3p	NM_016209	TRAPPC2L	AACTGGCCCTCAAAGTCCCGCT#TGGGGCTTTCAGGGCAGGCAGC#..((((((((.(((((((((..#))))))))).)))))...))).	541	563	1	-24.1	1	1.155383e-05	0.456	-0.307165	-0.450414	-7.78178	17	22	9	3UTR		0	0
hsa-miR-193b-3p	NM_016218	POLK	AACTGGCCCTCAAAGTCCCGCT#GTGGGGAGAGGGTCAGC#..(((((((((....((((((.#)))))).))))))))).	10695	10712	1	-25	1	0.00120824	0.485	0	0	-11.1852	15	17	9	3UTR		0	0
hsa-miR-193b-3p	NM_016249	MAGEC2	AACTGGCCCTCAAAGTCCCGCT#GGTAGTGGAGGGCCAGG#..(((((((((.....((....#)).....))))))))).	1522	1539	1	-22.5	1	0.000347117	0.441	-0.221029	-0.573337	-11.4183	11	17	9	3UTR		0	0
hsa-miR-193b-3p	NM_016250	NDRG2	AACTGGCCCTCAAAGTCCCGCT#GGGGGAGACTTGCTGGTGGGTTAGTG#.((((((((((((((((((.((#)).)).)))))..))).)))))))).	1701	1727	1	-23.7	1	0.00110604	0.5	4.1789071818181815	3.7519573449999997	-3.79332	20	26	8	3UTR		0	0
hsa-miR-193b-3p	NM_016257	HPCAL4	AACTGGCCCTCAAAGTCCCGCT#GGTTAAGGAGTTGGGGGCCTGGG#..(((((((((((..(((.(((#)))...))).))))))))).)).	998	1021	1	-21.3	1	4.281411e-05	0.441	0.10811605833333333	0.46971825749999996	-6.54929	17	23	9	3UTR		0	0
hsa-miR-193b-3p	NM_016269	LEF1	AACTGGCCCTCAAAGTCCCGCT#AGTGGGATTTTATGCCAGTTG#(((((((....(((((((((((#)))))))))))..))))))).	3400	3421	1	-24.5	1	0.00121864	0.691	0.7577415818181819	0.296698	-11.3749	18	21	11	3UTR	MIRT016343	0	0
hsa-miR-193b-3p	NM_016287	HP1BP3	AACTGGCCCTCAAAGTCCCGCT#GTGGGGAGGGACTCTAAATAAACCAGTTT#(((((((((((.....(((((.#))))))))))............)))))).	1905	1934	1	-19.8	1	0.0368308	0.618	1.4230406130434783	1.4197884450000005	-10.3988	16	29	10	3UTR	MIRT041380	0	0
hsa-miR-193b-3p	NM_016289	CAB39	AACTGGCCCTCAAAGTCCCGCT#AGCTATCCAAAATGGGAGTTTGGGGGCAGC#..((.(((((((((.(((((..#.))))).))))))))))).	1936	1966	1	-26.1	0	8.889742e-05	0.559	0.7278085555555555	1.2211336045000003	-9.81149	16	19	11	3UTR		0	1
hsa-miR-193b-3p	NM_016327	UPB1	AACTGGCCCTCAAAGTCCCGCT#GGTTTTTACATCTGTAAAATGGGACTGGGCCAGG#..(((((((....(((((((..#.)))))))))))))).	2474	2508	1	-25.7	1	0.00150451	0.485	-0.283885	-0.117396	-13.6602	14	16	14	3UTR		0	0
hsa-miR-193b-3p	NM_016346	NR2E3	AACTGGCCCTCAAAGTCCCGCT#GCATGGGAAACATAAAGCAGAATTGGGAGGGACTTTGTGGAGACAGGGCTGGA#..(((((((((((((((((.((#.)).))))))))).......)))))))).	1588	1641	1	-27.2	1	0.00012265	0.559	-0.596396	-0.115543	-4.957	19	29	9	3UTR		0	0
hsa-miR-193b-3p	NM_016368	ISYNA1	AACTGGCCCTCAAAGTCCCGCT#GGTGGGGCTAGATGGGGGCGGGG#..((.(((((((.(((((((((#)))))))))...))))))).)).	1989	2012	1	-31.2	0	0.00430264	0.368	3.081401111111111	2.46901	-10.3652	18	23	9	3UTR		0	0
hsa-miR-193b-3p	NM_016426	GTSE1	AACTGGCCCTCAAAGTCCCGCT#AGTGCTGGAGAGGGTGGGCTGAGGGACTGGGGCCAGC#..((((((((...(((((((((#.)))...)))))))))))))).	2729	2766	1	-27.9	1	0.000546752	0.294	0.09437975000000005	-0.428392	-12.4177	17	22	14	3UTR		0	0
hsa-miR-193b-3p	NM_016433	GLTP	AACTGGCCCTCAAAGTCCCGCT#GGTCGGGAGTTTGAGACCAGCCTGGCCAA#...(((((((((((.(((((((#)).))))).))))))........))))).	1271	1300	1	-25.5	0	0.000685292	0.485	0.3059535263157895	0.29960329087499993	-7.24999	18	29	6	3UTR		0	0
hsa-miR-193b-3p	NM_016436	PHF20	AACTGGCCCTCAAAGTCCCGCT#GGGATCTGGGCCAGG#..(((((((.....(((((...#)))))..))))))).	3251	3266	1	-23.1	1	5.416429e-05	0.426	1.568379571428571	2.0098612100000004	-14.5171	12	15	7	3UTR		0	0
hsa-miR-193b-3p	NM_016522	NTM	AACTGGCCCTCAAAGTCCCGCT#AGGGGGATTGGGGGATCCGGG#..((((((((((..(((((.((#)).)))))))))))..)))).	2783	2804	1	-24.2	1	3.233017e-05	0.441	3.7828250000000003	3.3130859499999996	-7.10297	17	21	11	3UTR		0	0
hsa-miR-193b-3p	NM_016526	BET1L	AACTGGCCCTCAAAGTCCCGCT#AGTAAAACCAAAAGGACTCTTGGGGGCTCAGTG#.(((((((((((((((((....#.))))).)))))))).)))).	2778	2811	1	-27.1	1	4.180562e-05	0.471	3.9304852631578955	3.263553485000001	-3.79332	17	21	8	3UTR		0	0
hsa-miR-193b-3p	NM_016530	RAB8B	AACTGGCCCTCAAAGTCCCGCT#AGGGGGGCACAGGGGTGGGTG#.(((.(((((....(((((.((#)).)))))...))))).))).	4080	4101	1	-23.7	0	0.00297571	0.544	-0.32523	0.44218550323749994	-16.2299	15	21	5	3UTR		0	0
hsa-miR-193b-3p	NM_016531	KLF3	AACTGGCCCTCAAAGTCCCGCT#AGTGGGGAACGAGGAACAGA#..(((..((((....(((((((#)))))))...))))..))).	5534	5554	1	-20.8	0	0.132657	0.574	0.20521364285714286	0.05313129374999999	-14.6299	14	20	7	3UTR		0	0
hsa-miR-193b-3p	NM_016556	PSMC3IP	AACTGGCCCTCAAAGTCCCGCT#GGCCAAGATATGCTTGACAGAAAGGGTGATTTTGAGGCTCAGTTA#((((((.((((((((((((.((#.)))).)))))))))).)))))).	1241	1286	1	-24	0	0.000714681	0.647	3.831817992307693	2.9151092237500005	-5.48126	20	24	10	3UTR	MIRT016392	0	0
hsa-miR-193b-3p	NM_016559	PEX5L	AACTGGCCCTCAAAGTCCCGCT#CGAGAAACCCAGTCTGGTAAGGACTCTTGGGGCCAGC#..(((((((.((((((((.(((#.)))..))))).)))))))))).	4240	4277	1	-25.4	1	1.170614e-06	0.426	-0.0295667	0.18099783374999992	-6.19951	18	23	10	3UTR		0	0
hsa-miR-193b-3p	NM_016571	LGSN	AACTGGCCCTCAAAGTCCCGCT#AGGAGGATTGCTTGAGGCCAGG#..((((.(((((((((((..((#))..)))))..)))))))))).	2892	2914	1	-21.3	0	3.578891e-05	0.426	0.8776344615384615	0.38459814587499996	-6.50069	17	22	10	3UTR		0	0
hsa-miR-193b-3p	NM_016578	RSF1	AACTGGCCCTCAAAGTCCCGCT#GTGGGGGTGGGGGGGCAGG#..(((.(((((..(.((((((.#)))))).).))))).))).	10826	10845	1	-26.2	0	0.04786	0.529	0	0	-12.2293	15	19	6	3UTR	MIRT016606	1	1
hsa-miR-193b-3p	NM_016602	CCR10	AACTGGCCCTCAAAGTCCCGCT#AGTGGAAGACGCTGAGGGCCTGGGTG#.(((((((((((..((((((((#)))))..)))..))))))))..))).	1373	1399	1	-27.1	1	0.000159329	0.353	2.141242923076923	2.38783	-5.9393	19	26	8	3UTR		0	0
hsa-miR-193b-3p	NM_016610	TLR8	AACTGGCCCTCAAAGTCCCGCT#TTTTGAGGGTCAGG#..(((((((((((((.......#))))))))))))).	3484	3498	1	-21.4	1	0.000278115	0.471	0.2776825546153846	-0.0688008	-5.19005	13	14	13	3UTR		0	0
hsa-miR-193b-3p	NM_016615	SLC6A13	AACTGGCCCTCAAAGTCCCGCT#AGCTGGGTGGGGGCTGGTA#.(((((((((((....((((((#))).)))))))))))))).	2098	2117	1	-24.3	1	5.978853e-05	0.324	1.4817402545454548	1.6623178037500004	-6.90779	17	19	14	3UTR		0	0
hsa-miR-193b-3p	NM_016622	MRPL35	AACTGGCCCTCAAAGTCCCGCT#GTGGGTAGGAGGGCTT#....(((((((.....(((((.#)))))...))))))).	2700	2716	1	-22.1	0	0.000181458	0.662	-0.0797591	0.16586266874999997	-16.0078	12	16	7	3UTR		0	0
hsa-miR-193b-3p	NM_016834	MAPT	AACTGGCCCTCAAAGTCCCGCT#TGGGACTTTAGGGCTAA#...(((((((.(((((((((..#)))))))))))))))).	2286	2303	1	-25.6	0	0.00120505	0.515	1.7093493333333332	1.21312	-9.33931	16	17	16	3UTR		0	0
hsa-miR-193b-3p	NM_016835	MAPT	AACTGGCCCTCAAAGTCCCGCT#GTGGGGCAGGCTCTTGGGGCCAGC#..(((((((.(((.(((((((.#)))))))......)))))))))).	5500	5524	1	-26.9	1	7.559984e-07	0.412	0.05460630000000003	-0.316445	-7.05635	17	24	10	3UTR		0	0
hsa-miR-193b-3p	NM_016835	MAPT	AACTGGCCCTCAAAGTCCCGCT#TGGGACTTTAGGGCTAA#...(((((((.(((((((((..#)))))))))))))))).	3411	3428	1	-25.6	0	0.00120505	0.515	-0.214554	-0.162672	-9.33931	16	17	16	3UTR		0	0
hsa-miR-193b-3p	NM_016841	MAPT	AACTGGCCCTCAAAGTCCCGCT#GTGGGGCAGGCTCTTGGGGCCAGC#..(((((((.(((.(((((((.#)))))))......)))))))))).	4282	4306	1	-26.9	1	7.559984e-07	0.412	0.10474871428571432	-0.126068	-7.05635	17	24	10	3UTR		0	0
hsa-miR-193b-3p	NM_016841	MAPT	AACTGGCCCTCAAAGTCCCGCT#TGGGACTTTAGGGCTAA#...(((((((.(((((((((..#)))))))))))))))).	2193	2210	1	-25.6	0	0.00120505	0.515	1.05963	1.10201	-9.33931	16	17	16	3UTR		0	0
hsa-miR-193b-3p	NM_017414	USP18	AACTGGCCCTCAAAGTCCCGCT#AGTGGGGAGAGCAGTGGCAGTGGGAGGCATCTGGGGGCCAA#...(((((((((...(((((((#.)))))))......))))))))).	1585	1626	1	-27.7	0	3.613745e-05	0.412	-0.126045	0.10260278874999999	-9.39596	16	24	9	3UTR		0	0
hsa-miR-193b-3p	NM_017438	SETD4	AACTGGCCCTCAAAGTCCCGCT#AGTGCTGAACTGTGAGGAGAGAGGCGGACTGTGAGGCAGCCAGG#..((((((((((.(((.(((((#.)))))))).)))))..))))).	1734	1778	1	-27.5	1	8.606152e-05	0.382	3.2383387666666668	2.68674	-6.24613	18	23	8	3UTR		0	0
hsa-miR-193b-3p	NM_017508	SOX6	AACTGGCCCTCAAAGTCCCGCT#GGCGGGGTGGGGGCAGA#..((.(((((((...(((((((#)))))))))))))))).	7523	7540	1	-24.4	0	0.00863684	0.456	4.472920428571428	4.333863409999999	-11.9575	16	17	16	3UTR		0	0
hsa-miR-193b-3p	NM_017515	SLC35F2	AACTGGCCCTCAAAGTCCCGCT#GGCGGGAAAGCAGGCTGTCCAGGCTGGGCTTGGTGGTCAGG#..((((((.((.((((((.(((#.))).)))))))).)))))).	1479	1520	1	-22.7	1	0.000444566	0.338	0.6531578166666668	-0.114968	-9.36019	17	21	8	3UTR		0	0
hsa-miR-193b-3p	NM_017590	ZC3H7B	AACTGGCCCTCAAAGTCCCGCT#GGTGGGAAGGGTGAGGGTCTGGG#..((((((((((...(((((((#)))))))....)))))))).)).	4259	4282	1	-26.4	1	0.0543586	0.382	-0.125768	-0.112229	-7.83842	17	23	8	3UTR	MIRT041480	0	0
hsa-miR-193b-3p	NM_017590	ZC3H7B	AACTGGCCCTCAAAGTCCCGCT#GGTGGGGTGGGGCCAGA#..(((((((.((...(((((((#)))))))))))))))).	3227	3244	1	-25.5	1	0.00132603	0.324	-0.723364	0.17156834000000004	-9.08093	16	17	16	3UTR	MIRT041480	0	0
hsa-miR-193b-3p	NM_017592	MED29	AACTGGCCCTCAAAGTCCCGCT#AGTGGAGATGTTGGGGCCAGG#..(((((((.(((.((((((((#))))).))).)))))))))).	3031	3052	1	-27.7	1	0.0147169	0.471	0.22261400333333337	-0.0856806	-7.05635	18	21	10	3UTR		0	0
hsa-miR-193b-3p	NM_017614	BHMT2	AACTGGCCCTCAAAGTCCCGCT#AGCACTTTGGGAGGCCAGG#..((((((((((((((...(((#))))))))))).)))))).	2250	2269	1	-24.3	1	3.930905e-06	0.441	0.03926113333333333	0.0715189	-4.957	17	19	11	3UTR		0	0
hsa-miR-193b-3p	NM_017643	MBTD1	AACTGGCCCTCAAAGTCCCGCT#GGAGATTTTGGGATTTTTAGAAGTTAGGCCAGTC#.((((((((((((((((((...#)).)))))))))..............))))))).	2626	2660	1	-23.6	1	0.00372217	0.588	1.0076607636363637	1.9900353075000003	-3.79332	18	34	9	3UTR		0	0
hsa-miR-193b-3p	NM_017649	CNNM2	AACTGGCCCTCAAAGTCCCGCT#GCAGTTCTTTGGGGGCCAGA#..(((((((((((((..(.((.#)).)..))))))))))))).	7895	7915	1	-28	1	0.00108663	0.529	0.07686584615384616	-0.00091465	-5.19005	16	20	13	3UTR		1	0
hsa-miR-193b-3p	NM_017649	CNNM2	AACTGGCCCTCAAAGTCCCGCT#GGAGGGAACTTTGGGGATTGCCAGC#..(((((((((((((((((.((#)).)))).))))))))...))))).	3909	3934	1	-26.7	1	7.073742e-05	0.412	0.4687735523809523	-0.0963815	-4.957	19	25	8	3UTR		1	0
hsa-miR-193b-3p	NM_017653	DYM	AACTGGCCCTCAAAGTCCCGCT#AGCCACTGGGGCCACATTGAGGGCCAGTTG#(((((((((((((.((((((..#.))))))....))))))))))))).	3555	3585	1	-31.9	1	9.400814e-06	0.426	0.003629092307692321	0.18975798479999997	-4.79441	19	25	13	3UTR		0	0
hsa-miR-193b-3p	NM_017656	ZNF562	AACTGGCCCTCAAAGTCCCGCT#GGCGGGGTTTTGCCATGTTGGCCAGG#..((((((..((((((((((((#)))))))))))).......)))))).	11044	11070	1	-25	1	5.585237e-05	0.471	0.6045218333333333	-0.116576	-7.2559	18	26	12	3UTR		0	0
hsa-miR-193b-3p	NM_017728	TMEM104	AACTGGCCCTCAAAGTCCCGCT#GGCTTCTGCCGCTGACGGCCAATGGGGCTTGGGGCCAGG#..((((((((..((((((((((#.)))....))))))))))))))).	3668	3707	1	-28.6	1	3.138569e-09	0.324	-0.0258035	-0.374178	-11.1286	18	24	15	3UTR		0	1
hsa-miR-193b-3p	NM_017758	ALKBH5	AACTGGCCCTCAAAGTCCCGCT#AGTGGGGCTGTATCAGGCTGGG#..((((((.....(((((((((#)))))))))......)))))).	1903	1925	1	-23.4	1	0.000564495	0.603	1.2387945555555555	1.2822629612500003	-14.7166	15	22	9	3UTR	MIRT728354	1	1
hsa-miR-193b-3p	NM_017759	INO80D	AACTGGCCCTCAAAGTCCCGCT#TGGGACTATTTATAAAGGCCAGTTA#((((((((.....(((((((..#))))))).........)))))))).	6465	6490	1	-22.1	1	0.0733332	0.691	0.44716924999999985	0.42446002125000004	-13.6972	15	25	8	3UTR	MIRT498447	1	1
hsa-miR-193b-3p	NM_017772	TBC1D22B	AACTGGCCCTCAAAGTCCCGCT#GGTGGGGGGATGGGGGCCAGC#..((((((((((...(((((((#)))))))...)))))))))).	3103	3124	1	-31.4	1	0.000428126	0.368	-0.0620677	-0.0252449	-7.83842	17	21	10	3UTR		0	0
hsa-miR-193b-3p	NM_017790	RGS3	AACTGGCCCTCAAAGTCCCGCT#GGGGGATAGTGGGGGCAGTG#.(((.(((((((..(((((.(.#).)))))..)))))))))).	3131	3151	1	-26.7	0	0.0228092	0.412	0	0	-10.0583	16	20	10	3UTR		0	0
hsa-miR-193b-3p	NM_017799	TMEM260	AACTGGCCCTCAAAGTCCCGCT#GGCAGGGATTGGGGGGGATGGGG#..((.((((((..(((((((((#))).))))))..))))).).)).	3002	3025	1	-23.8	0	0.0860643	0.515	-0.749555	2.26011	-13.712	17	23	6	3UTR		1	0
hsa-miR-193b-3p	NM_017801	CMTM6	AACTGGCCCTCAAAGTCCCGCT#GTGTTTTGTTTGGGGGCTGGG#..((((((((((((....(((.#))).....)))))))))))).	3157	3178	1	-21.3	1	0.0443183	0.691	1.3190377500000001	0.5709991812499997	-5.9255	15	21	12	3UTR		0	0
hsa-miR-193b-3p	NM_017807	OSGEP	AACTGGCCCTCAAAGTCCCGCT#AGCCCAGGAGTTTGAGGTTGCAGTG#.((((..(((((((.(((.(((#)))...))).)))))))...)))).	1842	1867	1	-21.8	0	0.000406556	0.456	0.20720445428571427	1.8644960340000005	-7.97342	17	25	7	3UTR		0	0
hsa-miR-193b-3p	NM_017813	BPNT2	AACTGGCCCTCAAAGTCCCGCT#GGTGGTGGCTAGGAAGAGGGTCAGA#..(((((((((..(((((((((#))))).)))).....))))))))).	4747	4772	1	-26.1	1	0.0127925	0.412	0.17100793999999997	0.528929	-9.59293	18	25	9	3UTR		0	0
hsa-miR-193b-3p	NM_017849	TMEM127	AACTGGCCCTCAAAGTCCCGCT#GCGGGACTGGCCAGC#..((((((.....((((((((.#)))))))))))))).	5810	5825	1	-27	1	0.000338582	0.412	3.3227967499999997	3.86556	-14.7166	14	15	14	3UTR		0	0
hsa-miR-193b-3p	NM_017883	WDR13	AACTGGCCCTCAAAGTCCCGCT#GGTGGTCATGCTGAGGGCCGGC#..((((((((((..((.(((((#)))))..))..)))))))))).	2035	2057	1	-26.3	1	3.439417e-05	0.397	0.0759802	0.293324	-7.10297	17	22	10	3UTR		0	0
hsa-miR-193b-3p	NM_017920	URGCP	AACTGGCCCTCAAAGTCCCGCT#GTGGGGCTGTGCTCTGGTGCCTGAGAATGGCTGGTG#.(((((((((((.((((((((.#)))))))).............))))...))))))).	2858	2894	1	-23.2	1	6.289895e-05	0.426	3.223621928571429	2.0214803070000005	-5.08246	19	36	8	3UTR		0	0
hsa-miR-193b-3p	NM_017947	MOCOS	AACTGGCCCTCAAAGTCCCGCT#GGCTTCCCTAATGTATCTGTTCAGAGCCTGTGGGATTCAGGGTCAGTTT#((((((((((...((((((((.#.)))))))).)))))))))).	3917	3966	1	-27.9	1	0.0114839	0.603	-0.00605384	-0.0776603	-11.3983	18	21	10	3UTR		0	0
hsa-miR-193b-3p	NM_017951	SMPD4	AACTGGCCCTCAAAGTCCCGCT#GTGGGGTTTTGGGGGTTTGC#..(.(((((((((((((((((.#))))))))))))))))).).	3594	3614	1	-25.5	0	0.00146456	0.603	3.84256	3.1368	-7.98902	18	20	17	3UTR		0	0
hsa-miR-193b-3p	NM_017956	TRMT12	AACTGGCCCTCAAAGTCCCGCT#GGCTACCATATAGAAAATTGACTGAAGGAGGGCCAA#...((((((((..((((.....#.))))....)))))))).	1875	1911	1	-21.7	0	0.0226556	0.515	-0.0820759	0.17906884497500006	-11.1505	12	18	8	3UTR		0	0
hsa-miR-193b-3p	NM_017982	SUSD4	AACTGGCCCTCAAAGTCCCGCT#AGTGGTGAGGGCTGGA#..((((((((((.....(((((#))))))))))))))).	2917	2933	1	-21.8	1	0.00095181	0.559	1.21809	1.1353814812500003	-8.07147	15	16	15	3UTR		0	0
hsa-miR-193b-3p	NM_017994	TMEM248	AACTGGCCCTCAAAGTCCCGCT#GGCACTGTGGGGTCCTGAGGGCCAGTG#.(((((((((((...((((((.#.))))))...))))))))))).	4077	4104	1	-32.6	1	4.949954e-06	0.397	1.1937010000000001	1.7819073847499995	-6.67474	17	22	11	3UTR		0	0
hsa-miR-193b-3p	NM_018019	MED9	AACTGGCCCTCAAAGTCCCGCT#GGGAACTACGCTTTGGGGGCTTCAGC#..(((((((((((((((((...#)))......)))))))))))..))).	1084	1110	1	-23.9	1	0.000497787	0.368	0.14684412800000002	-0.0437288	-4.957	17	26	11	3UTR		0	0
hsa-miR-193b-3p	NM_018028	SAMD4B	AACTGGCCCTCAAAGTCCCGCT#GGCAGGGACTGGCCAGA#..((((((.....(((((((((#))).)))))))))))).	3404	3421	1	-23.6	1	3.409922e-06	0.382	1.6836294000000003	0.6394914600000001	-14.7166	15	17	12	3UTR		0	0
hsa-miR-193b-3p	NM_018029	EBLN2	AACTGGCCCTCAAAGTCCCGCT#AGCGGCAAACTACTGGGCCAA#...((((((....(((.(((((#)))))...)))...)))))).	1470	1491	1	-21	0	0.00573031	0.529	0.18506166666666665	0.17283184749999997	-15.2178	14	21	6	3UTR		0	0
hsa-miR-193b-3p	NM_018077	RBM28	AACTGGCCCTCAAAGTCCCGCT#GGTGGGGCTTTGCACAGTCTCATCCTGGCAAGGGAGGACGAGCCAAGGACCAGTTT#((((((((((((((((((((((#))))))))))))..................))))...............)))))).	9596	9652	1	-25.5	1	0.00072694	0.471	0.1936501818181818	0.693651	-3.93757	22	56	12	3UTR		0	0
hsa-miR-193b-3p	NM_018077	RBM28	AACTGGCCCTCAAAGTCCCGCT#AGCCTTAATTGGCACTTTAAGGGCCAGG#..((((((((.(((((.(((..#.))).))))).)))))))).	6111	6139	1	-25	1	1.321385e-05	0.529	0.22714092499999997	-0.155686	-7.78178	16	20	8	3UTR		0	0
hsa-miR-193b-3p	NM_018088	FAM90A1	AACTGGCCCTCAAAGTCCCGCT#GTGGGACTGAGGAGCACAGA#..(((((((((..((((((((.#)))))))))))).)).))).	2009	2029	1	-26.5	1	0.000343314	0.382	-0.229612	-0.132587	-9.59293	17	20	12	3UTR		0	0
hsa-miR-193b-3p	NM_018091	ELP3	AACTGGCCCTCAAAGTCCCGCT#GCCTGGAGAGGGTCAGTTC#(((((((((((....(((.((.#))..)))))))))))))).	3021	3040	1	-21.8	1	0.000286029	0.544	0.2993372609090909	0.12476034300000002	-10.1658	16	19	14	3UTR	MIRT041378	0	0
hsa-miR-193b-3p	NM_018100	EFHC1	AACTGGCCCTCAAAGTCCCGCT#GGCTTTGAGGGTA#.....((((((((((((.....#)))))))))))).	6117	6130	1	-20.9	0	0.0257687	0.603	-0.0495412	0.12067214750000001	-13.6656	12	13	12	3UTR		0	0
hsa-miR-193b-3p	NM_018105	THAP1	AACTGGCCCTCAAAGTCCCGCT#GGTTTCAAGATTGGGGATTTTGGGGTTT#....(((((.(((((((((...#.)))))))))))))).	1119	1147	1	-21.5	0	0.0525589	0.75	2.3234696333333336	1.5985	-10.7891	14	16	14	3UTR		0	0
hsa-miR-193b-3p	NM_018107	RBM23	AACTGGCCCTCAAAGTCCCGCT#GGCGGGGCGGGGAGGGGGGGGGGTTG#((((..(((((...((((((((#))))))))...))))).....)))).	2810	2836	1	-27.6	0	0.0214848	0.441	0.342075	0.024234886249999997	-15.4503	17	26	8	3UTR		0	0
hsa-miR-193b-3p	NM_018117	WDR11	AACTGGCCCTCAAAGTCCCGCT#GCCAGGGAATCTGACCTGGAAGGCAGATGGGAGGGGGCTGGTC#.((((((((((....(((((((#.)).))))))))))))))).	3747	3790	1	-22.7	1	0.000623198	0.368	0.012677100000000014	0.12134601750000011	-10.0215	17	20	15	3UTR		0	0
hsa-miR-193b-3p	NM_018120	ARMC1	AACTGGCCCTCAAAGTCCCGCT#GGACTGTGTGAACCAACAAGGGGCCAGTTT#((((((((((((.(((((....#))))).))...........)))))))))).	1082	1112	1	-23.7	1	9.965577e-06	0.5	0.3866751391304348	0.6953890387499998	-5.22671	17	30	10	3UTR	MIRT728309	1	1
hsa-miR-193b-3p	NM_018137	PRMT6	AACTGGCCCTCAAAGTCCCGCT#GCGGGGGAGTGAGGGGGAAGAACACGGATGAAAATGTCAGTTT#((((((((((((...((((((.#))))))...)))))).....................)))))).	1465	1508	1	-24.8	1	0.00765092	0.485	-0.609756	0.45860443874999995	-6.81899	18	43	6	3UTR		0	0
hsa-miR-193b-3p	NM_018163	DNAJC17	AACTGGCCCTCAAAGTCCCGCT#GGCTGAGGGACTTGGGGGAAATCAAGAGTGTCTGCCAGTG#.((((((((((.((((((((((#)))...))))))).))))...............)))))).	3513	3553	1	-25.9	1	9.481477e-05	0.485	4.153212538461538	3.72623	-7.14013	20	40	7	3UTR		0	0
hsa-miR-193b-3p	NM_018178	GOLPH3L	AACTGGCCCTCAAAGTCCCGCT#AGCAGAAATATCTAAATGGGATTTTGAGTTCTCCAGC#..((((..((((((((((((..#.))))))))))))....)))).	1328	1365	1	-22.2	0	0.00570294	0.691	0.017678966666666667	0.286138	-8.81432	16	22	12	3UTR		0	0
hsa-miR-193b-3p	NM_018179	ATF7IP	AACTGGCCCTCAAAGTCCCGCT#GGATTTTTAATATGAGGGCCAGC#..((((((((((((((((....#))))))......)))))))))).	5833	5856	1	-25.1	1	0.00065646	0.559	0.24319686909090918	0.29118	-4.957	16	23	10	3UTR		0	0
hsa-miR-193b-3p	NM_018179	ATF7IP	AACTGGCCCTCAAAGTCCCGCT#GGACTGGAGGGCTGAGTTA#(((((((((((..(((((....#))))).))))))).)))).	5897	5916	1	-24	1	0.000166435	0.603	0.5132677416666668	0.30055394300000005	-8.57351	16	19	7	3UTR		0	0
hsa-miR-193b-3p	NM_018184	ARL8B	AACTGGCCCTCAAAGTCCCGCT#AGCCCTCAAAGAATGGGGTCTGTGGGCTAGTTA#(((((((((....(((((((..#.))))).))..))))))))).	2872	2905	1	-22.5	1	1.297749e-05	0.642	0.7236572111111111	0.7123256340625	-12.6408	16	21	9	3UTR		0	0
hsa-miR-193b-3p	NM_018194	HHAT	AACTGGCCCTCAAAGTCCCGCT#AGCTTCTCTGCTTGGCAAAGAGATGGGAGGGGGCCAGA#..(((((((((....(((((((#.)).)))))))))))))).	3070	3108	1	-25.1	1	0.00140393	0.471	0	0	-11.1852	16	19	14	3UTR	MIRT016338	0	1
hsa-miR-193b-3p	NM_018195	NKAPD1	AACTGGCCCTCAAAGTCCCGCT#GGGAAGTCAAGGGCTGGG#..((((((((.....((((...#)))).....)))))))).	1848	1866	1	-21.1	1	0.00779192	0.544	0.72257	0.593927	-14.01	12	18	8	3UTR		0	0
hsa-miR-193b-3p	NM_018198	DNAJC11	AACTGGCCCTCAAAGTCCCGCT#AGCGGGCTTGAGCTGGCCTGTG#.((.(((((((.(((.((((((#))))))))))))..)))).)).	2419	2441	1	-24.9	0	4.785058e-05	0.309	4.34521	4.90684	-10.4052	18	22	12	3UTR	MIRT041301	0	0
hsa-miR-193b-3p	NM_018201	TBC1D13	AACTGGCCCTCAAAGTCCCGCT#AGCGGGTCTCACTCCAGAGGGTCAGA#..(((((((((..(((((((((#))))))....)))...))))))))).	3735	3761	1	-27.2	1	0.000294961	0.574	0.1737634615384615	0.27258059999999995	-9.59293	18	26	9	3UTR		0	0
hsa-miR-193b-3p	NM_018208	ETNK2	AACTGGCCCTCAAAGTCCCGCT#AGCCAAGAGGATGGGGTGGGGGCCAGG#..((((((((((...(((((((#.)).))))))))))))))).	2246	2273	1	-26.6	1	6.510987e-05	0.324	1.3687155999999998	1.17343	-7.83842	17	20	15	3UTR		0	0
hsa-miR-193b-3p	NM_018212	ENAH	AACTGGCCCTCAAAGTCCCGCT#GGCGGGAGGATTGCTTGAGGCCAGA#..((((.((((((..(((((((#))))))).......)))))))))).	7584	7609	1	-25.5	0	0.00883088	0.471	0.2323700857142857	0.013510226250000014	-8.09298	17	25	10	3UTR	MIRT041235	0	0
hsa-miR-193b-3p	NM_018228	VRTN	AACTGGCCCTCAAAGTCCCGCT#GGCTCGAATATGGGGGCCAGG#..((((((((((...((..(((#)))..))...)))))))))).	2786	2807	1	-24	1	1.560089e-05	0.485	0.305968	0.322484	-7.83842	15	21	10	3UTR		0	0
hsa-miR-193b-3p	NM_018255	ELP2	AACTGGCCCTCAAAGTCCCGCT#AGTGGTGCCAGCTGAGGGCTGGA#..((((((((((..((.(((((#))))).))....)))))))))).	3540	3563	1	-23.7	1	2.327247e-07	0.368	-0.0770709	-0.072066	-7.10297	17	23	10	3UTR		0	0
hsa-miR-193b-3p	NM_018257	PCMTD2	AACTGGCCCTCAAAGTCCCGCT#GGGACTCTATGATGGGCAGC#..((.(((((((.((((((...#))))))...))).)))))).	2170	2190	1	-21.5	0	0.00412052	0.618	-0.350061	0.10448482125000005	-10.3652	15	20	6	3UTR		0	0
hsa-miR-193b-3p	NM_018265	INAVA	AACTGGCCCTCAAAGTCCCGCT#AGGGGGTCTGGCTGGGGGCTGGTC#.(((((((((((.((.(((.((#)).))).))...))))))))))).	2717	2741	1	-27.3	1	1.642665e-08	0.397	0.05063477272727272	-0.247182	-5.3155	18	24	11	3UTR		0	0
hsa-miR-193b-3p	NM_018301	RBM41	AACTGGCCCTCAAAGTCCCGCT#AGCACTTTGGGAGGCCGGG#..((((((((((((((...(((#))))))))))).)))))).	4597	4616	1	-23.6	1	5.415998e-06	0.382	0.21956974666666662	0.3168683125000001	-4.957	17	19	11	3UTR		0	0
hsa-miR-193b-3p	NM_018304	PRR11	AACTGGCCCTCAAAGTCCCGCT#GGCTTGGGGGCCAGG#..(((((((((.(((((.....#)))))))))))))).	5272	5287	1	-24.7	1	4.426483e-06	0.588	-0.00389	0.12969805000000004	-8.3038	14	15	14	3UTR		0	0
hsa-miR-193b-3p	NM_018328	MBD5	AACTGGCCCTCAAAGTCCCGCT#GGGATGAGGGCTCACAGG#..((((((((((...((((...#)))))))))))...))).	6196	6214	1	-21.6	1	0.00428853	0.588	2.638168615384615	2.3455318262500002	-7.83842	14	18	11	3UTR		0	0
hsa-miR-193b-3p	NM_018347	AP5S1	AACTGGCCCTCAAAGTCCCGCT#GTGGGGCTGCTGAGCTCCAGTTC#((((((..((((.((((((((.#))))))))..))))..)))))).	3182	3205	1	-26.9	0	0.000304772	0.426	-0.0371023	-0.0103526	-9.08403	18	23	8	3UTR		0	0
hsa-miR-193b-3p	NM_001190980	YAF2	AACTGGCCCTCAAAGTCCCGCT#GGTGGGATTGGGATTCCAGTG#.((((((((....(((((((((#))))))))))))...))))).	1762	1783	1	-22	1	1.956743e-05	0.559	0.19507490000000008	0.46783661999999987	-12.4965	17	21	12	3UTR		0	0
hsa-miR-193b-3p	NM_001190986	CRISP3	AACTGGCCCTCAAAGTCCCGCT#TGGGTGAGGGCTAT#...(((((((((....((((..#))))))))))))).	2086	2100	1	-19.8	0	0.00166084	0.618	2.2671887777777777	1.6680532524999996	-9.62901	13	14	13	3UTR		0	0
hsa-miR-193b-3p	NM_001190995	IPO8	AACTGGCCCTCAAAGTCCCGCT#GGAGTGTGAGGGTCAA#...(((((((((.(.(((....#))).).))))))))).	2876	2892	1	-21	0	0.0170006	0.515	2.367479777777778	2.5478917312499996	-8.53912	13	16	9	3UTR	MIRT041468	0	0
hsa-miR-193b-3p	NM_001190997	SLC6A13	AACTGGCCCTCAAAGTCCCGCT#AGCTGGGTGGGGGCTGGTA#.(((((((((((....((((((#))).)))))))))))))).	1822	1841	1	-24.3	1	5.978853e-05	0.324	2.9115167272727276	2.0955827049999995	-6.90779	17	19	14	3UTR		0	0
hsa-miR-193b-3p	NM_001193304	TMEM127	AACTGGCCCTCAAAGTCCCGCT#GCGGGACTGGCCAGC#..((((((.....((((((((.#)))))))))))))).	5787	5802	1	-27	1	0.000338582	0.412	3.16668	4.150820036249999	-14.7166	14	15	14	3UTR		0	0
hsa-miR-193b-3p	NM_001193347	MEF2C	AACTGGCCCTCAAAGTCCCGCT#TGTGGAGTTGGAGGGCTAA#...((((((((.((.(((((..#)).))).)).)))))))).	2473	2492	1	-21	0	0.000446618	0.765	3.7532687499999997	1.40209	-10.5968	15	19	8	3UTR		0	0
hsa-miR-193b-3p	NM_001193434	PLEKHS1	AACTGGCCCTCAAAGTCCCGCT#CTTTGGGAGGCCGGG#..(((((((((((((.......#))))))).)))))).	3772	3787	1	-20.7	1	5.116073e-05	0.441	-0.178489	-0.111724	-5.19005	13	15	7	3UTR		0	0
hsa-miR-193b-3p	NM_001193435	PLEKHS1	AACTGGCCCTCAAAGTCCCGCT#CTTTGGGAGGCCGGG#..(((((((((((((.......#))))))).)))))).	3576	3591	1	-20.7	1	5.116073e-05	0.441	-0.178489	-0.111724	-5.19005	13	15	7	3UTR		0	0
hsa-miR-193b-3p	NM_001193489	SECISBP2L	AACTGGCCCTCAAAGTCCCGCT#AGTGGGAAGAGTAAGGGTTGGTTC#((((((((((.....(((((((#)))))))......)))))))))).	5926	5950	1	-22.8	1	0.0398477	0.632	3.8808228000000007	2.8174507018749995	-12.9906	17	24	10	3UTR		0	0
hsa-miR-193b-3p	NM_001193495	ADAR	AACTGGCCCTCAAAGTCCCGCT#GGCCTGCTCCCTGGCTCTGGGTCTGCTGGGGGCACAGTA#.(((((((((((.((.((((((#.)))...))).))..))))))).)))).	5844	5883	1	-26.7	1	1.019162e-05	0.368	0.22189333333333341	0.8983452925000003	-5.3155	19	28	7	3UTR		0	0
hsa-miR-193b-3p	NM_001193495	ADAR	AACTGGCCCTCAAAGTCCCGCT#GGGACTTTGTTGGCTT#....((((..(((((((((...#)))))))))..)))).	5376	5392	1	-23.4	0	0.000132137	0.574	2.365292433333333	2.18787	-11.8455	13	16	9	3UTR		0	0
hsa-miR-193b-3p	NM_001193517	CHMP3	AACTGGCCCTCAAAGTCCCGCT#GTGGGACATGGGCCT#....(((((.....(((((((.#)))))))..))))).	1400	1415	1	-23.4	0	7.034849e-05	0.485	0.4286966285714286	0.03325213374999996	-19.1066	12	15	7	3UTR		0	0
hsa-miR-193b-3p	NM_001193535	FBXL5	AACTGGCCCTCAAAGTCCCGCT#GTGGTGATCTGTGGCCAGTG#.(((((((..((..(((((((.#)))).))).)).))))))).	3342	3362	1	-21.5	1	0.00217264	0.647	3.9661445000000004	2.68355	-8.23819	16	20	7	3UTR		0	0
hsa-miR-193b-3p	NM_001193557	ENY2	AACTGGCCCTCAAAGTCCCGCT#AGTTGTCTTATTCGTATTGTTTATAAACTTTGAGGGTTAGG#..((((((((((((((......#.)))))))))))))).	764	805	1	-23.1	1	1.198947e-05	0.647	0.3950444714285715	1.0549402275000002	-4.957	14	16	14	3UTR		0	0
hsa-miR-193b-3p	NM_001194946	EIF4G1	AACTGGCCCTCAAAGTCCCGCT#AGGGGGAAGGGGGGGCACGGTG#.((((((((((....((((.((#)).))))...)))))).)))).	5374	5396	1	-26.3	1	1.253329e-05	0.485	2.4428545454545456	2.4840669965909092	-10.0215	16	22	6	3UTR		0	0
hsa-miR-193b-3p	NM_001194947	EIF4G1	AACTGGCCCTCAAAGTCCCGCT#AGGGGGAAGGGGGGGCACGGTG#.((((((((((....((((.((#)).))))...)))))).)))).	5317	5339	1	-26.3	1	1.253329e-05	0.485	1.75468	2.4219254249999995	-10.0215	16	22	6	3UTR		0	0
hsa-miR-193b-3p	NM_001194990	MEPCE	AACTGGCCCTCAAAGTCCCGCT#AGAGGGACTGAGGGTTAGA#..(((((((((..((((((.((#)).))))))))))))))).	2137	2156	1	-25.9	1	0.0143657	0.412	1.0086618666666667	1.27641	-9.59293	17	19	15	3UTR	MIRT041225	0	0
hsa-miR-193b-3p	NM_001194990	MEPCE	AACTGGCCCTCAAAGTCCCGCT#AGTGGGAGAGGGGGTTGGG#..(((((((((....(((((((#)))))))..))))))))).	2217	2236	1	-24.1	1	8.040444e-13	0.471	1.3414630111111112	1.9775649100000001	-11.1852	16	19	9	3UTR	MIRT041225	0	0
hsa-miR-193b-3p	NM_001194992	MEPCE	AACTGGCCCTCAAAGTCCCGCT#AGAGGGACTGAGGGTTAGA#..(((((((((..((((((.((#)).))))))))))))))).	1587	1606	1	-25.9	1	0.0143657	0.412	1.0086618666666667	1.27641	-9.59293	17	19	15	3UTR	MIRT041225	0	0
hsa-miR-193b-3p	NM_001194992	MEPCE	AACTGGCCCTCAAAGTCCCGCT#AGTGGGAGAGGGGGTTGGG#..(((((((((....(((((((#)))))))..))))))))).	1667	1686	1	-24.1	1	8.040444e-13	0.471	1.3414630111111112	1.9775649100000001	-11.1852	16	19	9	3UTR	MIRT041225	0	0
hsa-miR-193b-3p	NM_001195045	YAP1	AACTGGCCCTCAAAGTCCCGCT#ATTTTGGGGGCTGGG#..((((((((((((((......#)))))))))))))).	1750	1765	1	-20.5	1	0.00108015	0.544	1.1190945714285714	1.44443	-4.957	14	15	14	3UTR		0	0
hsa-miR-193b-3p	NM_001195059	PLEKHO2	AACTGGCCCTCAAAGTCCCGCT#GGCTGGGGCTGGGGCTGGG#..((((((((...(((((((((#))).)))))))))))))).	1658	1677	1	-25.6	1	1.361822e-05	0.353	0.07098263999999999	0.358333	-12.4177	17	19	14	3UTR		0	0
hsa-miR-193b-3p	NM_001195087	GGACT	AACTGGCCCTCAAAGTCCCGCT#GGGAGAGCATTTGGGGGTGAGTC#.(((.((((((((((((((...#)))...)).))))))))).))).	1463	1486	1	-23.1	0	9.380659e-05	0.485	0	0	-7.91236	17	23	9	3UTR		0	0
hsa-miR-193b-3p	NM_001195201	CCDC107	AACTGGCCCTCAAAGTCCCGCT#GGTGGGGCGGGGACTACGGAGAAGGTGCAGCCAGG#..(((((((((...((((((((#)))))))))))).................))))).	718	753	1	-22.7	1	0.000327042	0.324	0.9311845499999999	0.2654361062499998	-10.4498	17	35	12	3UTR		0	0
hsa-miR-193b-3p	NM_001195217	CCDC107	AACTGGCCCTCAAAGTCCCGCT#GGTGGGGCGGGGACTACGGAGAAGGTGCAGCCAGG#..(((((((((...((((((((#)))))))))))).................))))).	791	826	1	-22.7	1	0.000327042	0.324	0.9311845499999999	0.2654361062499998	-10.4498	17	35	12	3UTR		0	0
hsa-miR-193b-3p	NM_001195228	PIMREG	AACTGGCCCTCAAAGTCCCGCT#GGTGCCAAGGCTCTTGAGGGCCC#....(((((((((((((.((((#))))....)))).))))))))).	1168	1191	1	-22.4	0	3.536654e-06	0.397	0.1905409528571429	-0.149006	-9.54656	17	23	9	3UTR		0	0
hsa-miR-193b-3p	NM_001195263	PDZD7	AACTGGCCCTCAAAGTCCCGCT#GGTGGGGGGGGGGGGGTCAA#...((((((((....(((((((#)))))))....)))))))).	3899	3919	1	-25.1	0	0.0164661	0.471	0.31383272500000003	0.20909264999999994	-12.7428	15	20	8	3UTR		0	0
hsa-miR-193b-3p	NM_001195272	TEX13C	AACTGGCCCTCAAAGTCCCGCT#GGGATTTTCTGGGCCT#....(((((..((((((((...#))))))))..))))).	4722	4738	1	-23.7	0	3.44148e-07	0.636	0	0	-13.6138	13	16	8	3UTR		0	0
hsa-miR-193b-3p	NM_001195286	IRF4	AACTGGCCCTCAAAGTCCCGCT#AGCTGAAGTAGAGGGGACGTGAGAGAAGGGCCAGG#..((((((((((..(((((.((#.))))))).))).....))))))).	4915	4950	1	-25.8	1	0.001105	0.412	-0.0697486	-0.372664	-7.10297	17	25	7	3UTR		0	0
hsa-miR-193b-3p	NM_001195396	ARL4A	AACTGGCCCTCAAAGTCCCGCT#GGTTTAAAACAACTTTTTTGGGGATTTAGGGCTAT#...(((((((..(((((((...#.)))))))))))))).	1505	1540	1	-21.1	0	0.000494139	0.647	1.4317288571428572	1.4244763212499998	-12.6861	14	16	14	3UTR		0	0
hsa-miR-193b-3p	NM_001195553	DCX	AACTGGCCCTCAAAGTCCCGCT#TGGGTTGCAGATGTCCTTGAAGAGAGTGAGGCATTGAGGGCCAA#...((((((((((.(((.((((#.)))).))).)))))))))).	4497	4541	1	-27.7	0	3.531685e-05	0.441	0.04482293999999999	0.125984	-7.37138	17	21	10	3UTR		0	0
hsa-miR-193b-3p	NM_001195581	ARL14EPL	AACTGGCCCTCAAAGTCCCGCT#GGTGAATTTTAGGGCTTGGGGGA#......(((((.((((((....#.))))))))))).	567	590	1	-17	0	0.000713188	0.618	0.7206963333333333	-0.131179	-18.9134	11	13	11	3UTR		0	0
hsa-miR-193b-3p	NM_001195597	SMLR1	AACTGGCCCTCAAAGTCCCGCT#GGTTTGCTCCATCTTCCTCCAATAATGGGCACTTCAGAAGGCCAGTTC#((((((((.((.((((((((..#.)))).))))..)).)))))))).	1825	1873	1	-22.9	1	0.00835	0.456	0.4647771777777778	0.1353593137500001	-8.34077	18	24	8	3UTR		0	0
hsa-miR-193b-3p	NM_001195677	VAPB	AACTGGCCCTCAAAGTCCCGCT#AGAATGACTTTGGGGGCTT#....(((((((((((((...((#))...))))))))))))).	5205	5224	1	-22.6	0	0.000912797	0.5	0.4141466846153846	-0.0687028	-9.54656	15	19	13	3UTR		0	0
hsa-miR-193b-3p	NM_001195683	TGFBR3	AACTGGCCCTCAAAGTCCCGCT#GACTCAGAGGGCTGGA#..(((((((((..((((.....#))))..))))))))).	3031	3047	1	-21.4	1	5.761644e-05	0.485	0.9962933222222223	1.41543	-9.59293	13	16	9	3UTR	MIRT016418	1	1
hsa-miR-193b-3p	NM_001195684	TGFBR3	AACTGGCCCTCAAAGTCCCGCT#GACTCAGAGGGCTGGA#..(((((((((..((((.....#))))..))))))))).	2995	3011	1	-21.4	1	5.761644e-05	0.485	0.1795096777777777	0.5183141025000002	-9.59293	13	16	9	3UTR	MIRT016418	1	1
hsa-miR-193b-3p	NM_001195755	FFAR4	AACTGGCCCTCAAAGTCCCGCT#GGCTGGGGCCTGTCAGTTGAGGCCAGA#..((((.((((((.((((((((#))).))))).......)))))))))).	2692	2719	1	-23.1	0	0.000926104	0.412	-0.000350944	-0.118376	-7.35753	18	27	10	3UTR		0	0
hsa-miR-193b-3p	NM_001195790	SLFN12L	AACTGGCCCTCAAAGTCCCGCT#TGGGCTTTGGGGCCTAGG#..(((((((.(((((.((((..#)))))))))))))).)).	7873	7891	1	-24.3	1	3.79438e-07	0.5	0	0	-6.43256	16	18	14	3UTR		0	0
hsa-miR-193b-3p	NM_001195790	SLFN12L	AACTGGCCCTCAAAGTCCCGCT#GGCGGATCACTTGAGGCCAGG#..((((.((((.((((.(((((#)))))...)))))))))))).	12594	12615	1	-23.6	0	0.000359272	0.412	0	0	-9.84749	17	21	12	3UTR		0	0
hsa-miR-193b-3p	NM_001195822	HSDL2	AACTGGCCCTCAAAGTCCCGCT#AGGAGGATTGCTTGAGGCCAGG#..((((.(((((((((((..((#))..)))))..)))))))))).	2148	2170	1	-21.3	0	0.000363722	0.412	-0.0865802	0.172267	-6.50069	17	22	10	3UTR		0	0
hsa-miR-193b-3p	NM_001197129	SYS1	AACTGGCCCTCAAAGTCCCGCT#TGGGAGAGATAGTGAGGGCCTGTC#.((.((((((((...(((((..#))))).......)))))))).)).	827	851	1	-23.7	0	0.000238605	0.5	0.932082	1.0751986849999997	-9.70677	15	24	8	3UTR		0	0
hsa-miR-193b-3p	NM_001197129	SYS1	AACTGGCCCTCAAAGTCCCGCT#AGGGGACCTCTTTGAGGGTAATAACAGA#..(((((((((((((((((.((#)))))))...))))))))).....))).	932	960	1	-22.8	1	0.00709447	0.515	0.8748360959999998	0.9542906099999999	-4.957	19	28	9	3UTR		0	0
hsa-miR-193b-3p	NM_001197223	PDE4D	AACTGGCCCTCAAAGTCCCGCT#AGTGGAGCTAGGGCTGGG#..((((((((...(((.(((((#))))).))))))))))).	5435	5453	1	-21.5	1	2.261359e-05	0.588	2.8084325000000003	2.2602628874999997	-12.4177	16	18	11	3UTR		0	0
hsa-miR-193b-3p	NM_001197246	BTN3A2	AACTGGCCCTCAAAGTCCCGCT#GGAAAGTGGGGGTCAT#...(((((((((...(((....#)))...))))))))).	1445	1461	1	-19.3	0	0.000369623	0.485	1.6024391111111111	-1.05515	-9.39596	12	16	9	3UTR		0	0
hsa-miR-193b-3p	NM_001197247	BTN3A2	AACTGGCCCTCAAAGTCCCGCT#AGTGAAGATTGAAAATTAACCTCTGAGGGCCAGC#..((((((((((.((.......#.)).)))))))))).	1654	1688	1	-22.3	1	0.0038513	0.5	-0.124338	0.04531571250000001	-6.47918	12	15	10	3UTR		0	0
hsa-miR-193b-3p	NM_001197248	BTN3A2	AACTGGCCCTCAAAGTCCCGCT#AGTGAAGATTGAAAATTAACCTCTGAGGGCCAGC#..((((((((((.((.......#.)).)))))))))).	1211	1245	1	-22.3	1	0.0038513	0.5	0.07155159999999999	-0.0027816	-6.47918	12	15	10	3UTR		0	0
hsa-miR-193b-3p	NM_001197249	BTN3A2	AACTGGCCCTCAAAGTCCCGCT#AGTGAAGATTGAAAATTAACCTCTGAGGGCCAGC#..((((((((((.((.......#.)).)))))))))).	1272	1306	1	-22.3	1	0.0038513	0.5	0.07155159999999999	-0.0027816	-6.47918	12	15	10	3UTR		0	0
hsa-miR-193b-3p	NM_001197260	DOK1	AACTGGCCCTCAAAGTCCCGCT#GGTGGGAGGGGCCAT#...(((((((.....(((((((#)))))))))))))).	1545	1560	1	-23.2	0	2.044173e-05	0.382	0.0016474285714285577	0.17498178016250002	-15.5675	14	15	14	3UTR		0	0
hsa-miR-193b-3p	NM_001197293	DPYSL2	AACTGGCCCTCAAAGTCCCGCT#GTGGGGCTGGGGAGGGGCCGGG#..(((((((((..((((((((.#))))))))...))))).)))).	2762	2784	1	-31.1	1	1.053748e-05	0.559	0.3216	0.663329	-9.59293	17	22	8	3UTR		0	0
hsa-miR-193b-3p	NM_001198625	RUNX1T1	AACTGGCCCTCAAAGTCCCGCT#GGTGGTAGTAAAACACAGAGGGCCAGTA#.((((((((((...((.(((((#))))).......))...)))))))))).	2475	2503	1	-23.6	1	0.00822225	0.559	2.4999819000000003	4.28997	-9.2861	17	28	10	3UTR		1	1
hsa-miR-193b-3p	NM_001198626	RUNX1T1	AACTGGCCCTCAAAGTCCCGCT#GGTGGTAGTAAAACACAGAGGGCCAGTA#.((((((((((...((.(((((#))))).......))...)))))))))).	2333	2361	1	-23.6	1	0.00822225	0.559	6.12702	7.056230500000002	-9.2861	17	28	10	3UTR		1	1
hsa-miR-193b-3p	NM_001198627	RUNX1T1	AACTGGCCCTCAAAGTCCCGCT#GGTGGTAGTAAAACACAGAGGGCCAGTA#.((((((((((...((.(((((#))))).......))...)))))))))).	2393	2421	1	-23.6	1	0.00822225	0.559	6.64027	6.733304625000001	-9.2861	17	28	10	3UTR		1	1
hsa-miR-193b-3p	NM_001198628	RUNX1T1	AACTGGCCCTCAAAGTCCCGCT#GGTGGTAGTAAAACACAGAGGGCCAGTA#.((((((((((...((.(((((#))))).......))...)))))))))).	2166	2194	1	-23.6	1	0.00822225	0.559	3.92	4.46534	-9.2861	17	28	10	3UTR		1	1
hsa-miR-193b-3p	NM_001198631	RUNX1T1	AACTGGCCCTCAAAGTCCCGCT#GGTGGTAGTAAAACACAGAGGGCCAGTA#.((((((((((...((.(((((#))))).......))...)))))))))).	2189	2217	1	-23.6	1	0.00822225	0.559	4.364825000000001	4.7508394025000005	-9.2861	17	28	10	3UTR		1	1
hsa-miR-193b-3p	NM_001198632	RUNX1T1	AACTGGCCCTCAAAGTCCCGCT#GGTGGTAGTAAAACACAGAGGGCCAGTA#.((((((((((...((.(((((#))))).......))...)))))))))).	2251	2279	1	-23.6	1	0.00822225	0.559	4.758324000000001	6.600712625000001	-9.2861	17	28	10	3UTR		1	1
hsa-miR-193b-3p	NM_001198633	RUNX1T1	AACTGGCCCTCAAAGTCCCGCT#GGTGGTAGTAAAACACAGAGGGCCAGTA#.((((((((((...((.(((((#))))).......))...)))))))))).	2413	2441	1	-23.6	1	0.00822225	0.559	7.401610000000001	5.74528	-9.2861	17	28	10	3UTR		1	1
hsa-miR-193b-3p	NM_001198670	TLCD5	AACTGGCCCTCAAAGTCCCGCT#GGTCGCTTAAACAGAGGGGCATAGGAGGGTGAGA#..((.((((((...(((((.((#.)).)))))....)))))).)).	1634	1668	1	-24.1	0	0.0162382	0.441	0.01414179999999999	-0.00106941	-14.5688	15	23	6	3UTR		0	0
hsa-miR-193b-3p	NM_001198671	TLCD5	AACTGGCCCTCAAAGTCCCGCT#GGTCGCTTAAACAGAGGGGCATAGGAGGGTGAGA#..((.((((((...(((((.((#.)).)))))....)))))).)).	1315	1349	1	-24.1	0	0.0162382	0.441	0.01414179999999999	-0.00106941	-14.5688	15	23	6	3UTR		0	0
hsa-miR-193b-3p	NM_001198675	TLCD5	AACTGGCCCTCAAAGTCCCGCT#GGTCGCTTAAACAGAGGGGCATAGGAGGGTGAGA#..((.((((((...(((((.((#.)).)))))....)))))).)).	1115	1149	1	-24.1	0	0.0162382	0.441	0	0	-14.5688	15	23	6	3UTR		0	0
hsa-miR-193b-3p	NM_001198679	RUNX1T1	AACTGGCCCTCAAAGTCCCGCT#GGTGGTAGTAAAACACAGAGGGCCAGTA#.((((((((((...((.(((((#))))).......))...)))))))))).	2315	2343	1	-23.6	1	0.00822225	0.559	6.1697880000000005	7.36632	-9.2861	17	28	10	3UTR		1	1
hsa-miR-193b-3p	NM_001198754	GNGT2	AACTGGCCCTCAAAGTCCCGCT#AGTTTGGGCTGGGGGCCAGG#..(((((((((..(((((.(((#)))..)))))))))))))).	868	888	1	-25.8	1	6.756067e-06	0.412	0.616742888888889	0.863303	-9.59293	17	20	14	3UTR		0	0
hsa-miR-193b-3p	NM_001198756	GNGT2	AACTGGCCCTCAAAGTCCCGCT#AGCATTTCCACGCCAGAGTAGTTTGGGCTGGGGGCCAGG#..(((((((((..(((((.(((#.)))..)))))))))))))).	766	805	1	-26	1	6.756067e-06	0.412	0.39645455555555553	0.8721829799999998	-9.59293	17	21	14	3UTR		0	0
hsa-miR-193b-3p	NM_001198807	MSANTD3	AACTGGCCCTCAAAGTCCCGCT#GACTTTGGGGGTGGC#...(.((((((((((((.....#)))))))))))).).	1181	1196	1	-20.9	0	7.89892e-05	0.5	0.8656370833333332	0.9034718124999999	-10.6336	13	15	12	3UTR	MIRT016527	0	0
hsa-miR-193b-3p	NM_001198836	RBM14	AACTGGCCCTCAAAGTCCCGCT#GGTGGTCTGAGGGCCAAGTTA#((((((((((((.....(((((#)))))..))))))))).))).	2763	2784	1	-23.7	1	0.000694754	0.5	0.4677060153846154	0.46681465250000004	-7.05204	17	21	9	3UTR		0	0
hsa-miR-193b-3p	NM_001198837	RBM14	AACTGGCCCTCAAAGTCCCGCT#GGTGGTCTGAGGGCCAAGTTA#((((((((((((.....(((((#)))))..))))))))).))).	2652	2673	1	-23.7	1	0.000694754	0.5	0.4677060153846154	0.46681465250000004	-7.05204	17	21	9	3UTR		0	0
hsa-miR-193b-3p	NM_001198845	RBM14-RBM4	AACTGGCCCTCAAAGTCCCGCT#GGTGGGATGTGTGTGGGCTG#....(((((.((..((((((((#))))))))...)).))))).	1118	1138	1	-23.5	0	0.00290614	0.5	3.48198	3.0310769799999995	-12.935	15	20	8	3UTR		0	0
hsa-miR-193b-3p	NM_001198954	RNF103-CHMP3	AACTGGCCCTCAAAGTCCCGCT#GTGGGACATGGGCCT#....(((((.....(((((((.#)))))))..))))).	1755	1770	1	-23.4	0	7.034849e-05	0.485	0.04325858571428571	-0.185533	-19.1066	12	15	7	3UTR		0	0
hsa-miR-193b-3p	NM_001199140	AMMECR1L	AACTGGCCCTCAAAGTCCCGCT#GGCACTGCTAAAATGATTCACAGGGAGAGTGGCCAGTTG#(((((((((((....((((...#.))))))).)))))))).	2580	2619	1	-23.7	1	0.00237661	0.5	1.6936583583333331	1.04531	-10.1658	15	18	8	3UTR		0	0
hsa-miR-193b-3p	NM_001199173	MLST8	AACTGGCCCTCAAAGTCCCGCT#GGACGGGCCAGGCTGGGCCAGG#..(((((((.......((((((#)).)))).......))))))).	1519	1541	1	-22.9	1	2.89009e-11	0.353	0.09765345714285718	2.4956462500000005	-15.4856	13	22	7	3UTR		0	0
hsa-miR-193b-3p	NM_001199174	MLST8	AACTGGCCCTCAAAGTCCCGCT#GGACGGGCCAGGCTGGGCCAGG#..(((((((.......((((((#)).)))).......))))))).	1912	1934	1	-22.9	1	2.89009e-11	0.353	0.09765345714285718	2.4956462500000005	-15.4856	13	22	7	3UTR		0	0
hsa-miR-193b-3p	NM_001199175	MLST8	AACTGGCCCTCAAAGTCCCGCT#GGACGGGCCAGGCTGGGCCAGG#..(((((((.......((((((#)).)))).......))))))).	1546	1568	1	-22.9	1	2.89009e-11	0.353	0.09765345714285718	2.4956462500000005	-15.4856	13	22	7	3UTR		0	0
hsa-miR-193b-3p	NM_001199241	KYNU	AACTGGCCCTCAAAGTCCCGCT#AGTGGAGCTTTGAGAAGAGGGCCAC#...(((((((((((((.(((((#))))).))))))).....)))))).	12250	12275	1	-25.5	0	7.240731e-05	0.456	0.15770838888888888	0.03303812499999997	-6.51454	18	25	7	3UTR		0	0
hsa-miR-193b-3p	NM_001199241	KYNU	AACTGGCCCTCAAAGTCCCGCT#AGCCAGGGACTTGCCATTAGCGTTGGAAGTGGGGTTGTGGGGGCAGTC#.(((.(((((((.(((((((((#.))))))))).)))))))))).	13244	13292	1	-25.7	0	0.000194825	0.426	-0.126911	0.07986412500000004	-9.20149	19	22	10	3UTR		0	0
hsa-miR-193b-3p	NM_001199281	CABIN1	AACTGGCCCTCAAAGTCCCGCT#GGAGGGGTCCTTTAGGGCCAGG#..((((((((.((((((((.((#)).))))..)))))))))))).	7455	7477	1	-25	1	1.868563e-06	0.441	-0.823551	-0.0187069	-7.78178	18	22	12	3UTR		0	0
hsa-miR-193b-3p	NM_001199434	NIP7	AACTGGCCCTCAAAGTCCCGCT#AGCACTTTGGGAGGCCAA#...(((((((((((((...(((#))))))))))).))))).	1152	1170	1	-21.1	0	2.253198e-05	0.412	-0.365946	0.15379342824999997	-6.51454	16	18	11	3UTR		0	0
hsa-miR-193b-3p	NM_001199455	BRD2	AACTGGCCCTCAAAGTCCCGCT#GCTCCATTTGGGGCCCTGGGGGTTTCAGTC#.(((((((((((..((((((..#.))))))..)))))))..)))).	4308	4338	1	-24.4	1	1.153937e-05	0.426	1.23522	1.4382347599999998	-5.9393	17	23	7	3UTR		0	0
hsa-miR-193b-3p	NM_001199579	SUN2	AACTGGCCCTCAAAGTCCCGCT#GTGGGGCAGTTGGTGGGGGCTGGG#..((((((((((..(((((((.#)))))))......)))))))))).	3536	3560	1	-28.2	1	0.000487829	0.412	1.8712830999999999	1.8111927375000008	-7.10297	17	24	10	3UTR		0	0
hsa-miR-193b-3p	NM_001199580	SUN2	AACTGGCCCTCAAAGTCCCGCT#GTGGGGCAGTTGGTGGGGGCTGGG#..((((((((((..(((((((.#)))))))......)))))))))).	3497	3521	1	-28.2	1	0.000487829	0.412	1.5908630000000001	2.25617	-7.10297	17	24	10	3UTR		0	0
hsa-miR-193b-3p	NM_001199723	CRABP2	AACTGGCCCTCAAAGTCCCGCT#AGCCCAGAGCAGGGTCTCTCTAAAGGGGACTTGAGGGCCT#....(((((((.(((((((.((#.)))))))))))))))).	868	908	1	-28.8	0	5.77685e-07	0.412	0	0	-12.8934	16	18	16	3UTR		0	0
hsa-miR-193b-3p	NM_001199743	DCTN5	AACTGGCCCTCAAAGTCCCGCT#AGTGGAGACTAAGATGGAGCCAGTTC#(((((((((((..(((((((((#))))).))))..)).)).))))))).	4479	4505	1	-26	1	0.00630575	0.515	0.5339725461538462	0.2902304925000001	-8.57351	20	26	7	3UTR	MIRT194889	0	1
hsa-miR-193b-3p	NM_001199747	HOXD8	AACTGGCCCTCAAAGTCCCGCT#GATTGGGCCAGTG#.((((((((.............#.)))))))).	1157	1170	1	-17.4	1	0.0137221	0.632	0.853012	0.9805875150000001	-14.3219	8	10	8	3UTR		0	0
hsa-miR-193b-3p	NM_001199839	BCL2L2	AACTGGCCCTCAAAGTCCCGCT#GGTGGGGCTAGGTGTGGCTGGGGGCCAGG#..((((((((((.(((((((((#))))))))).........)))))))))).	806	835	1	-32	1	3.673176e-06	0.368	0	0	-6.24613	19	29	10	3UTR		1	0
hsa-miR-193b-3p	NM_001199853	AK3	AACTGGCCCTCAAAGTCCCGCT#CGGGAGGTTGAGGCAGG#..(((..((((((..(((((..#)))))..))))))))).	3247	3264	1	-19.7	0	0.00388075	0.368	-0.0271857	0.42330284000000007	-9.99394	14	17	9	3UTR		0	0
hsa-miR-193b-3p	NM_001199860	KCNAB2	AACTGGCCCTCAAAGTCCCGCT#GGCGGGCAGGGCCAGC#..((((((((....(.((((((#))))))))))))))).	1647	1663	1	-26.1	1	2.641058e-06	0.338	0.3908278999999999	-0.231875	-13.5076	15	16	15	3UTR		0	0
hsa-miR-193b-3p	NM_001199861	KCNAB2	AACTGGCCCTCAAAGTCCCGCT#GGCGGGCAGGGCCAGC#..((((((((....(.((((((#))))))))))))))).	1653	1669	1	-26.1	1	2.641058e-06	0.338	0.3908278999999999	-0.231875	-13.5076	15	16	15	3UTR		0	0
hsa-miR-193b-3p	NM_001199862	KCNAB2	AACTGGCCCTCAAAGTCCCGCT#GGCGGGCAGGGCCAGC#..((((((((....(.((((((#))))))))))))))).	1954	1970	1	-26.1	1	2.641058e-06	0.338	0.3908278999999999	-0.231875	-13.5076	15	16	15	3UTR		0	0
hsa-miR-193b-3p	NM_001199863	KCNAB2	AACTGGCCCTCAAAGTCCCGCT#GGCGGGCAGGGCCAGC#..((((((((....(.((((((#))))))))))))))).	1665	1681	1	-26.1	1	2.641058e-06	0.338	0.3908278999999999	-0.231875	-13.5076	15	16	15	3UTR		0	0
hsa-miR-193b-3p	NM_001199898	PDK2	AACTGGCCCTCAAAGTCCCGCT#GTGGGCGATGCCTGAGGGTTAGG#..((((((((((..(((((((.#)))))....)).)))))))))).	1636	1659	1	-23.9	1	0.000116434	0.382	0.39212636100000003	0.08291933674999998	-7.10297	17	23	10	3UTR		0	0
hsa-miR-193b-3p	NM_001199899	PDK2	AACTGGCCCTCAAAGTCCCGCT#GTGGGCGATGCCTGAGGGTTAGG#..((((((((((..(((((((.#)))))....)).)))))))))).	1435	1458	1	-23.9	1	0.000116434	0.382	0.39212636100000003	0.08291933674999998	-7.10297	17	23	10	3UTR		0	0
hsa-miR-193b-3p	NM_001200018	NAA80	AACTGGCCCTCAAAGTCCCGCT#GGGGGGCAGCTTTAACCTGGGCATGTTTCCTGGGTACCAGTGGGGCCAGG#..((((((((....((((((..#.)))).))....)))))))).	1062	1112	1	-23.1	1	0.00126494	0.397	0.505333	0.490778	-13.2745	14	21	8	3UTR		0	0
hsa-miR-193b-3p	NM_001201365	RNF14	AACTGGCCCTCAAAGTCCCGCT#GCGGGATATTTAGGGTA#.....(((((.((.(((((((.#))))))).)).))))).	1738	1755	1	-22.2	0	0.000489853	0.603	0.6111647142857143	0.6561416187500001	-17.3472	14	17	7	3UTR		0	0
hsa-miR-193b-3p	NM_001201365	RNF14	AACTGGCCCTCAAAGTCCCGCT#AGCACTTTGGGAGGCCTAGG#..((((((((((((((...(((#))))))))))).)))).)).	3320	3340	1	-20.5	1	0.000112026	0.368	-0.0791455	-0.132607	-4.957	17	20	11	3UTR		0	0
hsa-miR-193b-3p	NM_001201370	RNF7	AACTGGCCCTCAAAGTCCCGCT#AGACGGGATTTCCCCATGTTGGCCAGG#..((((((..((((((((((((#)).)))))))).....))..)))))).	1222	1249	1	-24.1	1	0.00128844	0.515	0.1413587777222223	0.035442418712500014	-7.2559	18	27	8	3UTR		0	0
hsa-miR-193b-3p	NM_001201370	RNF7	AACTGGCCCTCAAAGTCCCGCT#GGATTTTAAGTTTGGGCCAGTG#.((((((((..(((((((....#)))))))......)))))))).	841	863	1	-21.7	1	0.00208842	0.706	0.0956142	0.18270484493749997	-7.86061	15	22	8	3UTR		0	0
hsa-miR-193b-3p	NM_001201404	WASF2	AACTGGCCCTCAAAGTCCCGCT#GTGGGGCTCCTGAGGTTCAGTA#.(((((.(((((.((((((((.#))))))))..))))).))))).	1408	1430	1	-27.1	0	0.0003898	0.441	1.1227616249999999	0.970874	-6.62614	18	22	8	3UTR		0	0
hsa-miR-193b-3p	NM_001201407	ZNF778	AACTGGCCCTCAAAGTCCCGCT#TGGGGTCTTGCTGTGGGGGCTAGA#..((((((((((((((((((..#))))).)))....)))))))))).	6727	6751	1	-24.5	1	4.845414e-06	0.471	0.34333907478260867	-0.0251487	-4.957	18	24	10	3UTR		0	0
hsa-miR-193b-3p	NM_001201429	CABIN1	AACTGGCCCTCAAAGTCCCGCT#GGAGGGGTCCTTTAGGGCCAGG#..((((((((.((((((((.((#)).))))..)))))))))))).	7010	7032	1	-25	1	1.868563e-06	0.441	0.22572739999999997	-0.0619298	-7.78178	18	22	12	3UTR		0	0
hsa-miR-193b-3p	NM_001201472	CORO7	AACTGGCCCTCAAAGTCCCGCT#GGGCCTTGGGGGCTGGC#..(((((((((((.((((....#)))).))))))))))).	3210	3227	1	-24.4	1	2.266647e-08	0.353	2.3131047454545457	1.91121	-5.81384	15	17	11	3UTR		0	0
hsa-miR-193b-3p	NM_001201473	CORO7	AACTGGCCCTCAAAGTCCCGCT#GGGCCTTGGGGGCTGGC#..(((((((((((.((((....#)))).))))))))))).	3009	3026	1	-24.4	1	2.266647e-08	0.353	2.3803806272727277	1.9669651599999995	-5.81384	15	17	11	3UTR		0	0
hsa-miR-193b-3p	NM_001201480	OSBPL6	AACTGGCCCTCAAAGTCCCGCT#AGCAGTGGCTTGGGGGCTGGA#..(((((((((.((((((.(((#))).).)))))))))))))).	6658	6679	1	-23.8	1	0.000368217	0.5	-0.208017	0.2743133099999999	-8.3038	18	21	14	3UTR		0	0
hsa-miR-193b-3p	NM_001201481	OSBPL6	AACTGGCCCTCAAAGTCCCGCT#AGCAGTGGCTTGGGGGCTGGA#..(((((((((.((((((.(((#))).).)))))))))))))).	6490	6511	1	-23.8	1	0.000368217	0.5	-0.208017	0.2743133099999999	-8.3038	18	21	14	3UTR		0	0
hsa-miR-193b-3p	NM_001202475	CRHR2	AACTGGCCCTCAAAGTCCCGCT#AGGGGGACTGCAAGGGACAGGGATGAGTGGGGGCCAC#...(((((((((.((((((.((#)).))))))..................))))))))).	1536	1573	1	-26.7	0	0.000133085	0.353	4.023542333333333	3.57666	-7.80367	17	37	9	3UTR		0	0
hsa-miR-193b-3p	NM_001202476	UBE2E1	AACTGGCCCTCAAAGTCCCGCT#AGCTGCTTATGATTTTGAAGGGGTCAGG#..(((((((((((((((.....#.))))))))..))))))).	550	578	1	-20.5	1	0.00503139	0.515	3.94549705882353	2.9781751624999995	-4.957	15	19	8	3UTR		0	0
hsa-miR-193b-3p	NM_001202481	CRHR2	AACTGGCCCTCAAAGTCCCGCT#AGGGGGACTGCAAGGGACAGGGATGAGTGGGGGCCAC#...(((((((((.((((((.((#)).))))))..................))))))))).	1763	1800	1	-26.7	0	0.000133085	0.353	5.524929444444443	5.003339429999999	-7.80367	17	37	9	3UTR		0	0
hsa-miR-193b-3p	NM_001202514	MXD1	AACTGGCCCTCAAAGTCCCGCT#GGGATTTTGGGGTTGGG#..(((((((.(((((((((...#)))))))))))))))).	3590	3607	1	-25	1	0.000154655	0.529	1.1655865555555556	1.1982478637499998	-6.19951	16	17	16	3UTR		0	0
hsa-miR-193b-3p	NM_001202514	MXD1	AACTGGCCCTCAAAGTCCCGCT#GGTGGGGGGAGGGGCAGG#..(((.(((((....(((((((#))))))).))))).))).	2691	2709	1	-24.2	0	0.00766232	0.603	1.2456798571428571	0.5342792412499999	-13.0862	15	18	7	3UTR		0	0
hsa-miR-193b-3p	NM_001202557	CD44	AACTGGCCCTCAAAGTCCCGCT#TTGAGGGCATAGTTT#(((((((((((((.........#)))))))).))))).	1738	1753	1	-17.8	1	0.00119078	0.662	0.17299654285714286	0.14108680750000002	-5.76291	13	15	8	3UTR		0	0
hsa-miR-193b-3p	NM_001203244	SEMA4G	AACTGGCCCTCAAAGTCCCGCT#AGCTCCTACCCCTGTCCTACCTCACCGGGGCACTTTCAGGGGCCAGG#..((((((((.(((((((((..#.))))..)))))..)))))))).	2863	2910	1	-25.9	1	1.208211e-05	0.368	1.3473808181818179	2.21535	-7.78178	17	23	8	3UTR		0	0
hsa-miR-193b-3p	NM_001203251	MAPT	AACTGGCCCTCAAAGTCCCGCT#GTGGGGCAGGCTCTTGGGGCCAGC#..(((((((.(((.(((((((.#)))))))......)))))))))).	4369	4393	1	-26.9	1	7.559984e-07	0.412	0	0	-7.05635	17	24	10	3UTR		0	0
hsa-miR-193b-3p	NM_001203251	MAPT	AACTGGCCCTCAAAGTCCCGCT#GGTGGGGGCCTGCTGTGGGTCAGTG#.((((((((.((.(((((((((#)))))))..))..)).)))))))).	1997	2022	1	-25.5	1	0.000110032	0.279	0	0	-6.32496	19	25	8	3UTR		0	0
hsa-miR-193b-3p	NM_001203251	MAPT	AACTGGCCCTCAAAGTCCCGCT#TGGGACTTTAGGGCTAA#...(((((((.(((((((((..#)))))))))))))))).	2280	2297	1	-25.6	0	0.00120505	0.515	0	0	-9.33931	16	17	16	3UTR		0	0
hsa-miR-193b-3p	NM_001203252	MAPT	AACTGGCCCTCAAAGTCCCGCT#GTGGGGCAGGCTCTTGGGGCCAGC#..(((((((.(((.(((((((.#)))))))......)))))))))).	4456	4480	1	-26.9	1	7.559984e-07	0.412	0.0813142285714286	-0.390569	-7.05635	17	24	10	3UTR		0	0
hsa-miR-193b-3p	NM_001203252	MAPT	AACTGGCCCTCAAAGTCCCGCT#TGGGACTTTAGGGCTAA#...(((((((.(((((((((..#)))))))))))))))).	2367	2384	1	-25.6	0	0.00120505	0.515	-0.18687	-0.139876	-9.33931	16	17	16	3UTR		0	0
hsa-miR-193b-3p	NM_001204087	KCNN3	AACTGGCCCTCAAAGTCCCGCT#GCGGGGGGTGGGGGTCAGA#..((((((((((...((((((.#))))))..)))))))))).	2866	2885	1	-29.3	1	1.1137e-05	0.397	-0.254256	-0.183252	-7.83842	16	19	10	3UTR		0	0
hsa-miR-193b-3p	NM_001204137	MBD1	AACTGGCCCTCAAAGTCCCGCT#AGTTGGATTTTAAGGGTGGGG#..((.(((((.(((((((.(((#))).))))))).))))).)).	2342	2363	1	-22	0	0.0152581	0.588	-0.0372296	0.20385038499999997	-11.9008	17	21	7	3UTR		0	0
hsa-miR-193b-3p	NM_001204140	MBD1	AACTGGCCCTCAAAGTCCCGCT#AGTTGGATTTTAAGGGTGGGG#..((.(((((.(((((((.(((#))).))))))).))))).)).	2174	2195	1	-22	0	0.0152581	0.588	0.4872251285714286	0.35107351249999996	-11.9008	17	21	7	3UTR		0	0
hsa-miR-193b-3p	NM_001204218	NOS1	AACTGGCCCTCAAAGTCCCGCT#AGTGGGATTTGAGGGTGTCCGGG#..(((((((((.((((((((((#)))))))))))))))...)))).	11160	11183	1	-27.9	1	0.00203093	0.412	1.9280849999999998	1.7226515324999996	-8.3038	19	23	15	3UTR		0	0
hsa-miR-193b-3p	NM_001204300	ARHGAP19	AACTGGCCCTCAAAGTCCCGCT#GTGATGGGCTTTGATGTGGTGTCAATTTGGGGCCTTGTG#.((.(((((((((((((((((.#)))..)))))))))...............)))))..)).	3974	4013	1	-22.6	0	4.694511e-05	0.544	1.810584970588235	1.37553	-6.82535	19	39	9	3UTR	MIRT016589	1	1
hsa-miR-193b-3p	NM_001204376	NPR3	AACTGGCCCTCAAAGTCCCGCT#TGGGTAGGGGGGCCAGG#..(((((((((.....((((..#))))...))))))))).	3926	3943	1	-24.5	1	0.000440352	0.529	0.25107865555555553	0.45634102749999994	-11.4183	13	17	9	3UTR		0	0
hsa-miR-193b-3p	NM_001204426	LIMK1	AACTGGCCCTCAAAGTCCCGCT#GGCGGGGGTGGGAGGGCCAT#...((((((((..(.(((((((#))))))).)..)))))))).	2870	2890	1	-32.3	0	1.107349e-05	0.485	2.4299	1.93153	-11.8859	16	20	8	3UTR		0	0
hsa-miR-193b-3p	NM_001204446	AP5S1	AACTGGCCCTCAAAGTCCCGCT#GTGGGGCTGCTGAGCTCCAGTTC#((((((..((((.((((((((.#))))))))..))))..)))))).	3278	3301	1	-26.9	0	0.000304772	0.426	0	0	-9.08403	18	23	8	3UTR		0	0
hsa-miR-193b-3p	NM_001204447	AP5S1	AACTGGCCCTCAAAGTCCCGCT#GTGGGGCTGCTGAGCTCCAGTTC#((((((..((((.((((((((.#))))))))..))))..)))))).	3126	3149	1	-26.9	0	0.000304772	0.426	-0.0371023	-0.0103526	-9.08403	18	23	8	3UTR		0	0
hsa-miR-193b-3p	NM_001204504	DGKH	AACTGGCCCTCAAAGTCCCGCT#AGTGGGATGGGGCCT#....((((((....((((((((#)))))))))))))).	6568	6583	1	-23.8	0	0.000140621	0.456	0.179747	-0.280295	-17.8641	14	15	14	3UTR		0	0
hsa-miR-193b-3p	NM_001204505	DGKH	AACTGGCCCTCAAAGTCCCGCT#AGTGGGATGGGGCCT#....((((((....((((((((#)))))))))))))).	6386	6401	1	-23.8	0	0.000140621	0.456	-0.02895	-0.469953	-17.8641	14	15	14	3UTR		0	0
hsa-miR-193b-3p	NM_001204506	DGKH	AACTGGCCCTCAAAGTCCCGCT#AGTGGGATGGGGCCT#....((((((....((((((((#)))))))))))))).	6338	6353	1	-23.8	0	0.000140621	0.456	-0.02895	-0.469953	-17.8641	14	15	14	3UTR		0	0
hsa-miR-193b-3p	NM_001204860	ELOC	AACTGGCCCTCAAAGTCCCGCT#GGCGGGTAGATCACTTGAGGCCAGG#..((((.((((.((((((((((#))))))......)))))))))))).	1832	1857	1	-25	0	0.0028591	0.412	1.53286	3.1629394775000006	-9.84749	18	25	12	3UTR		0	0
hsa-miR-193b-3p	NM_001204861	ELOC	AACTGGCCCTCAAAGTCCCGCT#GGCGGGTAGATCACTTGAGGCCAGG#..((((.((((.((((((((((#))))))......)))))))))))).	1884	1909	1	-25	0	0.0028591	0.412	0.41755372500000004	0.48346741249999986	-9.84749	18	25	12	3UTR		0	0
hsa-miR-193b-3p	NM_001204868	STX16	AACTGGCCCTCAAAGTCCCGCT#GGCTGGGCTCGGTGGCTCACGCCTGTAATCCCAGACTTTGAGAGGCCAA#...(((((((((((((((((((#.)))))..................))))))))).))))).	3143	3192	1	-26.7	0	0.00587229	0.397	-0.534264	-0.0421412	-6.51454	19	40	9	3UTR	MIRT041539	1	1
hsa-miR-193b-3p	NM_001204869	CCN4	AACTGGCCCTCAAAGTCCCGCT#AGCTGCTGACTGGCAGGGCTTTGGGCAGTTGGCCAGG#..((((((((((((((((.(((#.))).)))))))))).....)))))).	1533	1570	1	-29.3	1	8.765328e-06	0.426	-0.45829	-0.307948	-4.957	19	27	10	3UTR		0	0
hsa-miR-193b-3p	NM_001204870	CCN4	AACTGGCCCTCAAAGTCCCGCT#AGCTGCTGACTGGCAGGGCTTTGGGCAGTTGGCCAGG#..((((((((((((((((.(((#.))).)))))))))).....)))))).	1253	1290	1	-29.3	1	8.765328e-06	0.426	-0.45829	-0.307948	-4.957	19	27	10	3UTR		0	0
hsa-miR-193b-3p	NM_001204889	ALDH2	AACTGGCCCTCAAAGTCCCGCT#GGTGGGGCAAGGTGTGAGGTGTTAGG#..((((((((((..((((((((#))))))))......))))).))))).	7938	7964	1	-24.5	1	0.12697	0.441	0.17131036363636362	0.15843973750000007	-7.10297	18	26	8	3UTR		0	0
hsa-miR-193b-3p	NM_001204911	USB1	AACTGGCCCTCAAAGTCCCGCT#GCGGGAATGAGGGAGCCTAGA#..((((((((((...((((((.#)))))).))))))...)))).	1386	1407	1	-24.5	1	0.0111872	0.529	-0.222118	0.02024077499999998	-7.83842	16	21	6	3UTR		0	0
hsa-miR-193b-3p	NM_001205316	STEAP4	AACTGGCCCTCAAAGTCCCGCT#TGGGGGCCAGTA#.(((((((((((..........#))))))))))).	7622	7634	1	-22.1	1	7.508887e-05	0.603	0.31130627363636365	0.45968756287499996	-6.90779	11	12	11	3UTR		0	0
hsa-miR-193b-3p	NM_001206	KLF9	AACTGGCCCTCAAAGTCCCGCT#AGTGAGGAGTTTGGGGTTGCCTAGC#..((((((((((((.(((((((#)))).))).)))))))..))).)).	4171	4196	1	-23.5	1	1.848993e-05	0.574	0.6322293333333334	0.878728	-5.69245	19	25	7	3UTR		0	0
hsa-miR-193b-3p	NM_001206691	RFX4	AACTGGCCCTCAAAGTCCCGCT#AGTGGGACTGGGTTTCTGTAGCCAAGCCAGA#..((((((((...(((((((((#)))))))))))).............))))).	2568	2599	1	-22.7	1	0.000244942	0.529	0.5046971222222223	1.4590928812500001	-12.4177	17	31	12	3UTR		0	0
hsa-miR-193b-3p	NM_001206696	IRF6	AACTGGCCCTCAAAGTCCCGCT#GGCTGGGATGAAGAAGGGCTGGG#..(((((((((...((((((((#))).)))))...)).))))))).	2421	2444	1	-24.4	1	0.00345047	0.485	0.38663600000000004	0.45866614999999983	-10.4498	17	23	7	3UTR		0	0
hsa-miR-193b-3p	NM_001206709	PRKAG1	AACTGGCCCTCAAAGTCCCGCT#GCATATGAAGGGAGATGGGGGTTAGG#..((((((((((...((((...#.))))..)))))))))).	1577	1603	1	-23	1	0.226623	0.485	1.8753646999999998	2.7168249165000002	-7.83842	14	18	10	3UTR		0	0
hsa-miR-193b-3p	NM_001206744	TPO	AACTGGCCCTCAAAGTCCCGCT#TGGGAAGAGCACTCCTGGCTTCCTGCAGGGCCGGTG#.((((((((((((((((.....#.)))))..)).))))))))).	3323	3359	1	-22.3	1	1.92136e-06	0.382	0	0	-3.79332	16	21	9	3UTR		0	0
hsa-miR-193b-3p	NM_001206836	RAB11A	AACTGGCCCTCAAAGTCCCGCT#AGCAGGATTTTGAGAGCTTGA#..(.(((.((((((((((.(((#))).)))))))))).))).).	1111	1132	1	-21.7	0	0.0042229	0.676	2.22411	1.40026	-10.3027	17	21	10	3UTR		0	0
hsa-miR-193b-3p	NM_001206843	GSG1	AACTGGCCCTCAAAGTCCCGCT#AGCGGGTTTGGGGAGTAGG#..(((..(((((((..((((((#)))))))))))))..))).	971	990	1	-21.3	0	0.00701474	0.485	-0.197124	-0.190537	-9.37014	16	19	13	3UTR		0	0
hsa-miR-193b-3p	NM_001206845	GSG1	AACTGGCCCTCAAAGTCCCGCT#AGCGGGTTTGGGGAGTAGG#..(((..(((((((..((((((#)))))))))))))..))).	902	921	1	-21.3	0	0.00701474	0.485	-0.0150743	-0.063102	-9.37014	16	19	13	3UTR		0	0
hsa-miR-193b-3p	NM_001206901	TAX1BP1	AACTGGCCCTCAAAGTCCCGCT#GGATCAGGGTCAGTC#.(((((((((....((((....#)))).))))))))).	2583	2598	1	-17.9	1	3.805799e-05	0.632	0.3514152222222222	0.934054	-12.1109	13	15	9	3UTR		0	0
hsa-miR-193b-3p	NM_001207026	POU2F2	AACTGGCCCTCAAAGTCCCGCT#AGGGGTGCTGATGGGGGTCAGTG#.(((((((((((.(((.((.((#)).)).)))..))))))))))).	1786	1809	1	-27.1	1	1.973537e-05	0.353	0	0	-5.08246	18	23	11	3UTR		0	0
hsa-miR-193b-3p	NM_001220	CAMK2B	AACTGGCCCTCAAAGTCCCGCT#AGTGGGAGTGCCTTTGGAATCTGGGCCGGG#..((((((((((((((((((((#)))))))....)))))).....))))))).	3443	3473	1	-27.7	1	0.000321779	0.456	5.677229199999998	4.55905	-4.957	20	30	7	3UTR		0	0
hsa-miR-193b-3p	NM_001220488	CDH13	AACTGGCCCTCAAAGTCCCGCT#GGTGGGAATGGGTGTGTGTATGAGGGTTTCAGA#..((((((((((...(((((((#))))))).............)))))))..))).	7236	7269	1	-21.5	1	0.0185379	0.676	0.214446	0.17135131625000008	-7.83842	17	33	7	3UTR		0	0
hsa-miR-193b-3p	NM_001220489	CDH13	AACTGGCCCTCAAAGTCCCGCT#GGTGGGAATGGGTGTGTGTATGAGGGTTTCAGA#..((((((((((...(((((((#))))))).............)))))))..))).	7013	7046	1	-21.5	1	0.0185379	0.676	0.214446	0.17135131625000008	-7.83842	17	33	7	3UTR		0	0
hsa-miR-193b-3p	NM_001240	CCNT1	AACTGGCCCTCAAAGTCCCGCT#GGTGGGATTGGAGGGTGGGA#..((.((((((..(((((((((#))))))))).)))))).)).	2744	2764	1	-28	0	0.112719	0.426	0.12273979999999998	0.521848	-13.712	17	20	9	3UTR		0	0
hsa-miR-193b-3p	NM_001240	CCNT1	AACTGGCCCTCAAAGTCCCGCT#GGTGGGTGGGAGGCTAGG#..((((((((((....((((((#)))))))))).)))))).	2773	2791	1	-22.6	1	0.00953502	0.456	0.9008135818181817	0.37692463174999996	-8.07147	16	18	10	3UTR		0	0
hsa-miR-193b-3p	NM_001241	CCNT2	AACTGGCCCTCAAAGTCCCGCT#AGAAATGACTACTTGAGGGCTAT#...((((((((((((((.....#.))))..)))))))))).	5417	5440	1	-20.5	0	0.00166851	0.662	0.403054	0.14409582874999993	-6.51454	14	18	10	3UTR		0	0
hsa-miR-193b-3p	NM_001242333	LHX6	AACTGGCCCTCAAAGTCCCGCT#AGTGGTGCTTGGGCCAGG#..(((((((...((((.(((((#))))).))))))))))).	2026	2044	1	-24.4	1	0.000213783	0.485	0.1663592571428571	1.2808810800000001	-12.3711	16	18	11	3UTR		0	0
[truncated: 2,814 more rows]

## Sheet: TargetScanHuman
Predicting downstream targets of miR-193b-3p
[truncated: 287 more rows]
